# Supplementary material for: Pd-catalyzed reaction of aryl halides and propargyl furylmethyl ethers: a novel pathway to functionalized dihydroisobenzofurans
Source: Royal Society of Chemistry journal article supplement (doi:10.1039/c3ob27503e), 2013-01-01

# Pd-Catalyzed Reaction of Aryl Halides and Propargyl Furylmethyl Ethers: A Novel Entry to Functionalized Dihydroisobenzofurans

Lingzhu Chen,<sup>a</sup> Ruwei Shen,<sup>a</sup> Luling Wu <sup>\*a</sup> and Xian Huang <sup>a, b</sup>

[wululing@zju.edu.cn](mailto:wululing@zju.edu.cn)

<sup>a</sup> Department of Chemistry, Zhejiang University, Hangzhou, 310028, P. R. China

<sup>b</sup> State Key Laboratory of Organometallic Chemistry, Shanghai Institute of Organic Chemistry, Chinese Academy of Sciences, Shanghai, 200032, P. R. China.

## Supporting Information

|                                                                    |        |
|--------------------------------------------------------------------|--------|
| <sup>1</sup> H NMR and <sup>13</sup> C NMR spectra of all products | S2-S76 |
|--------------------------------------------------------------------|--------|

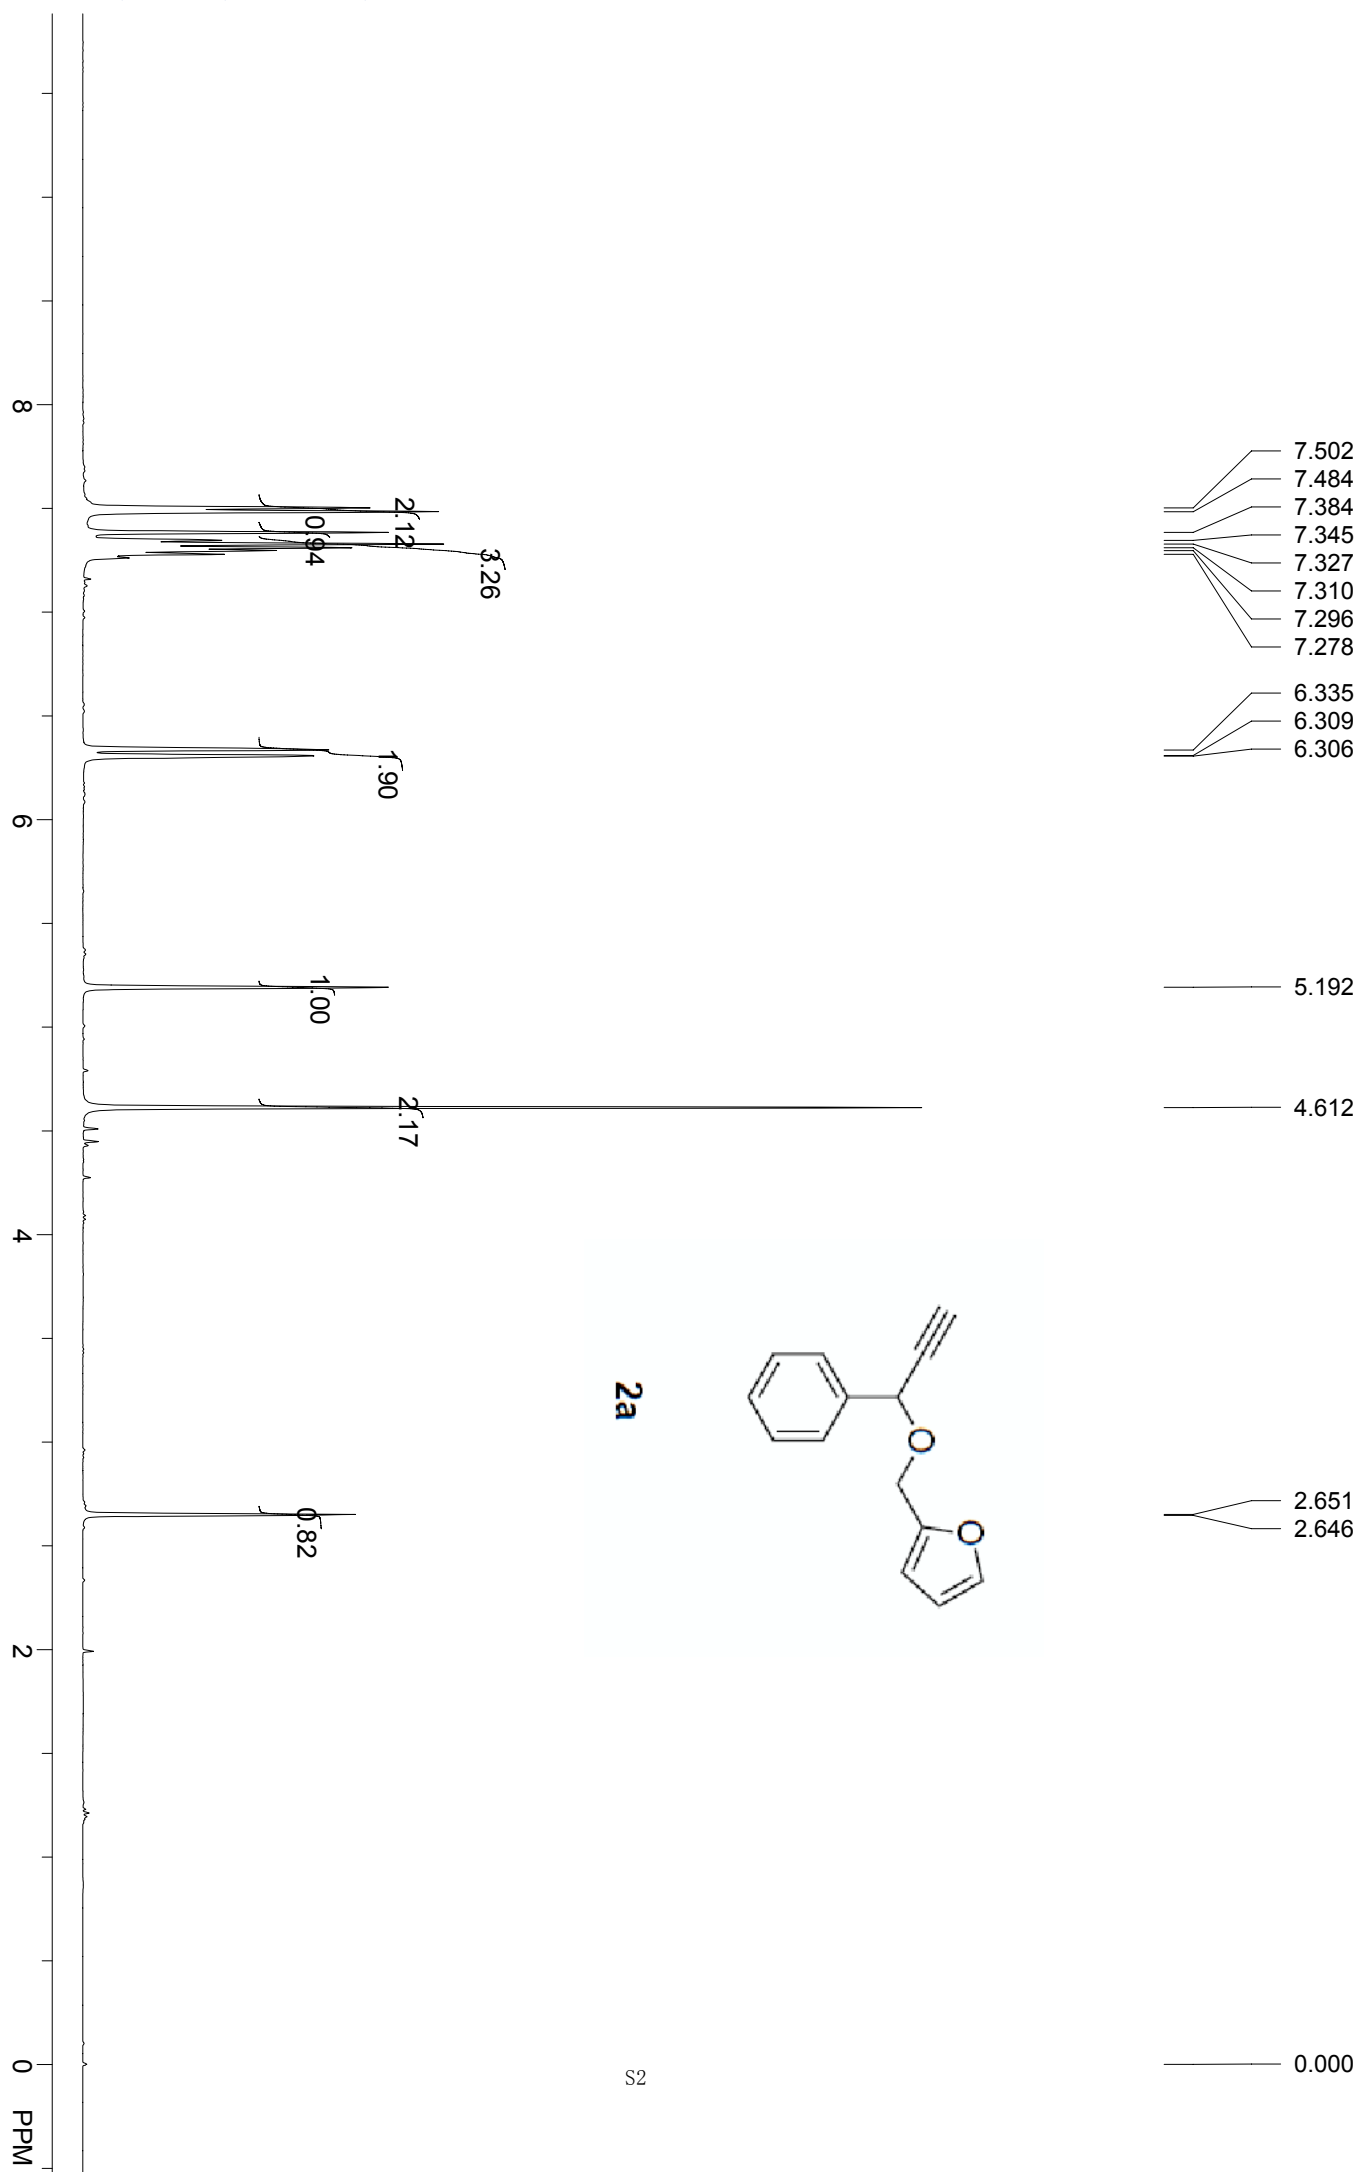

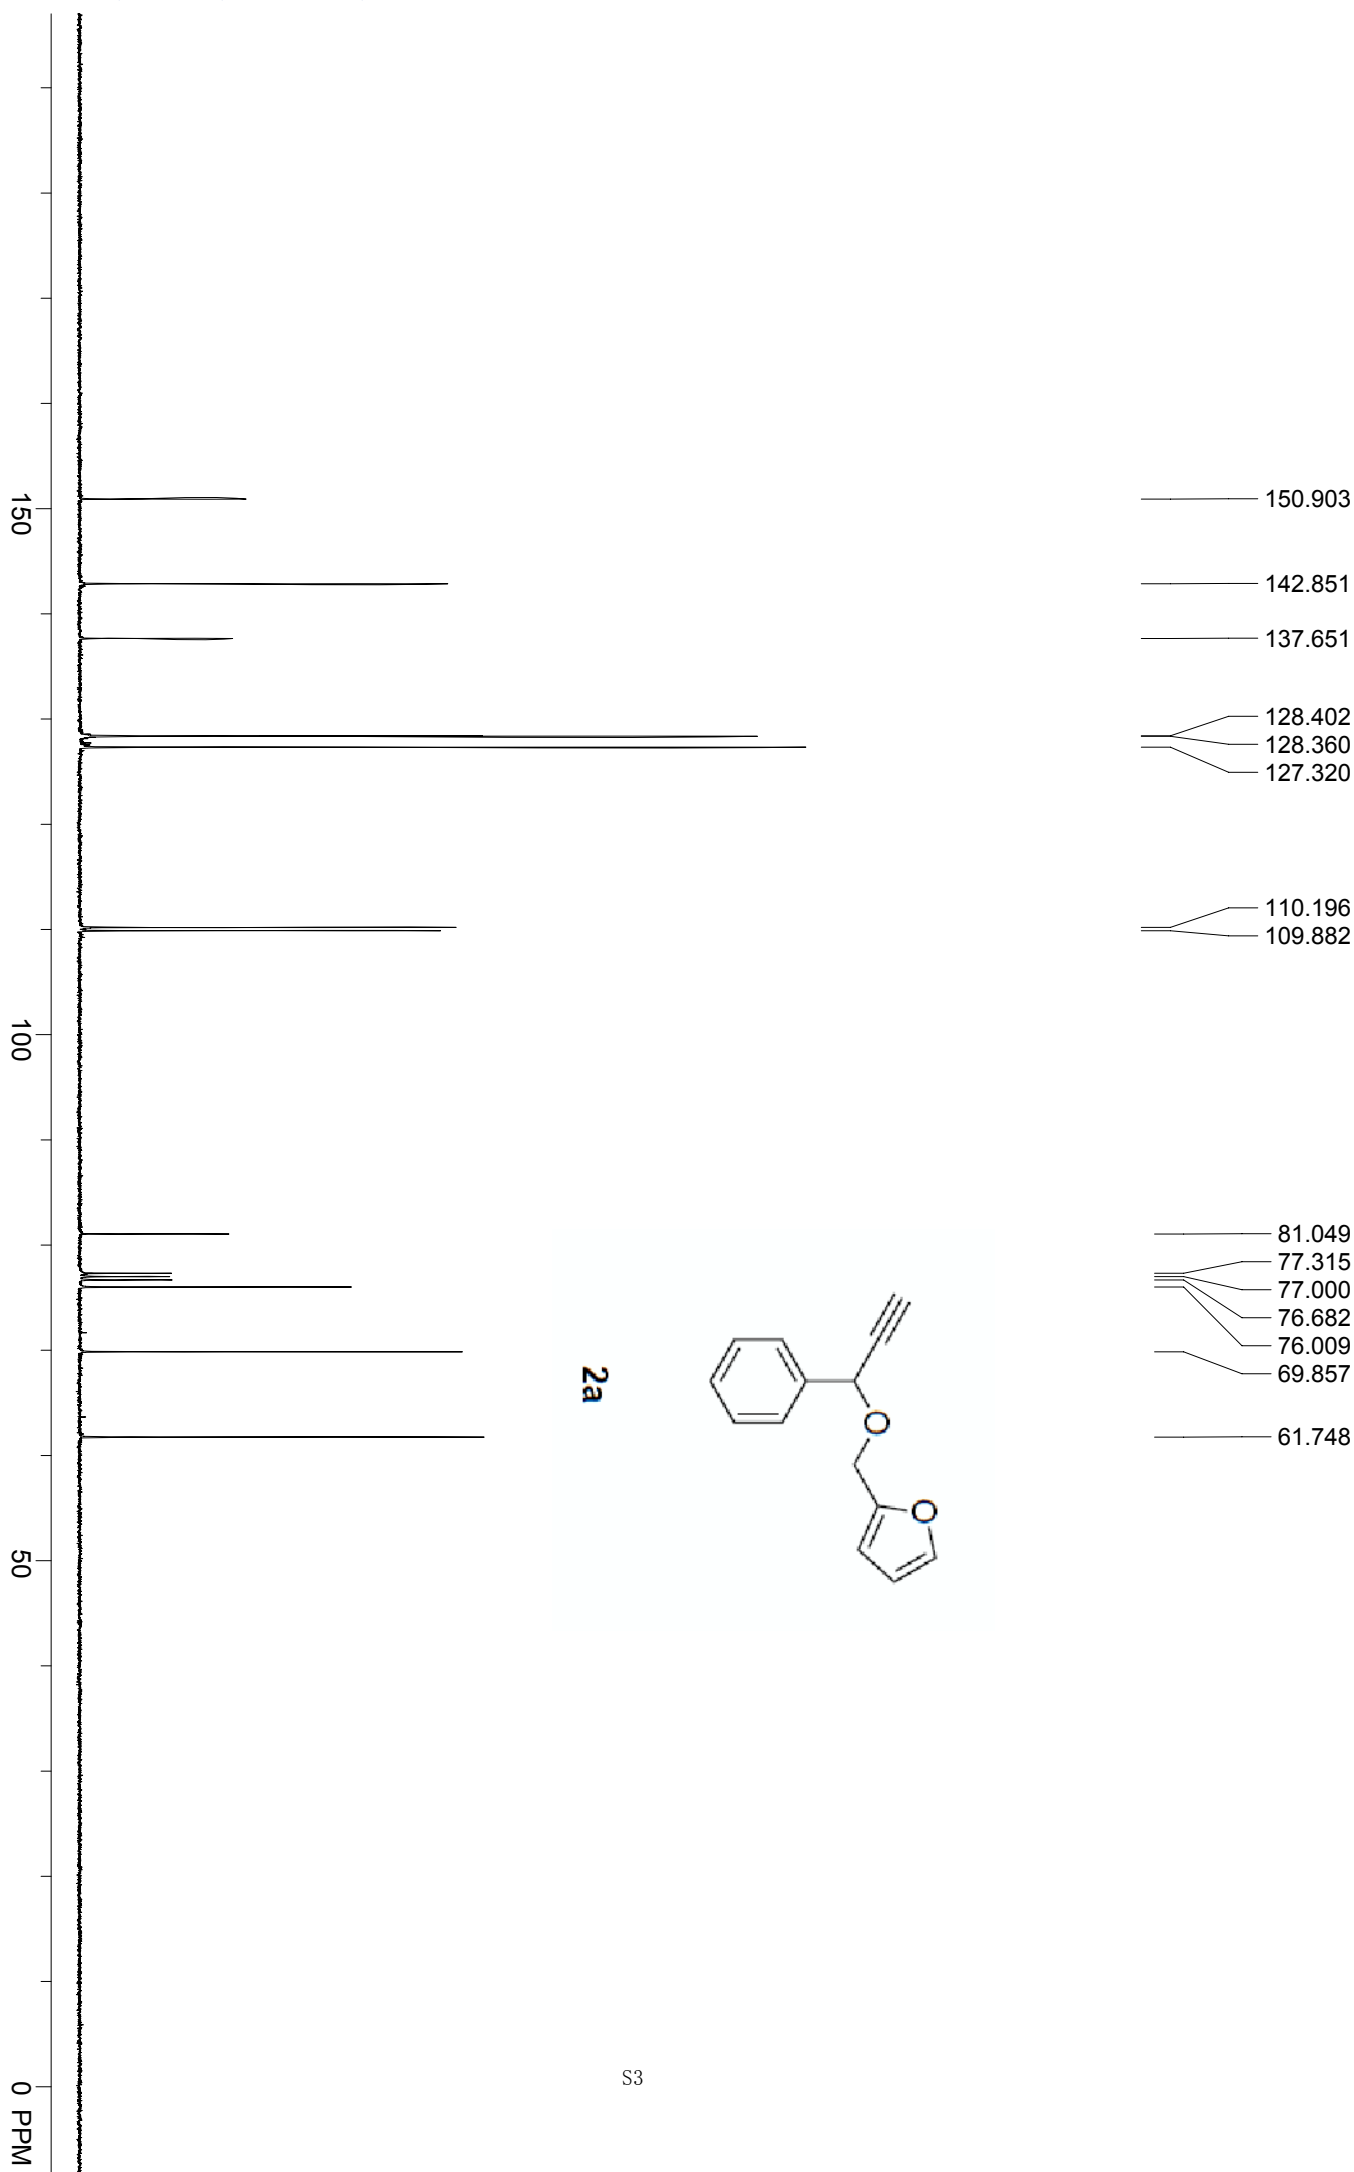

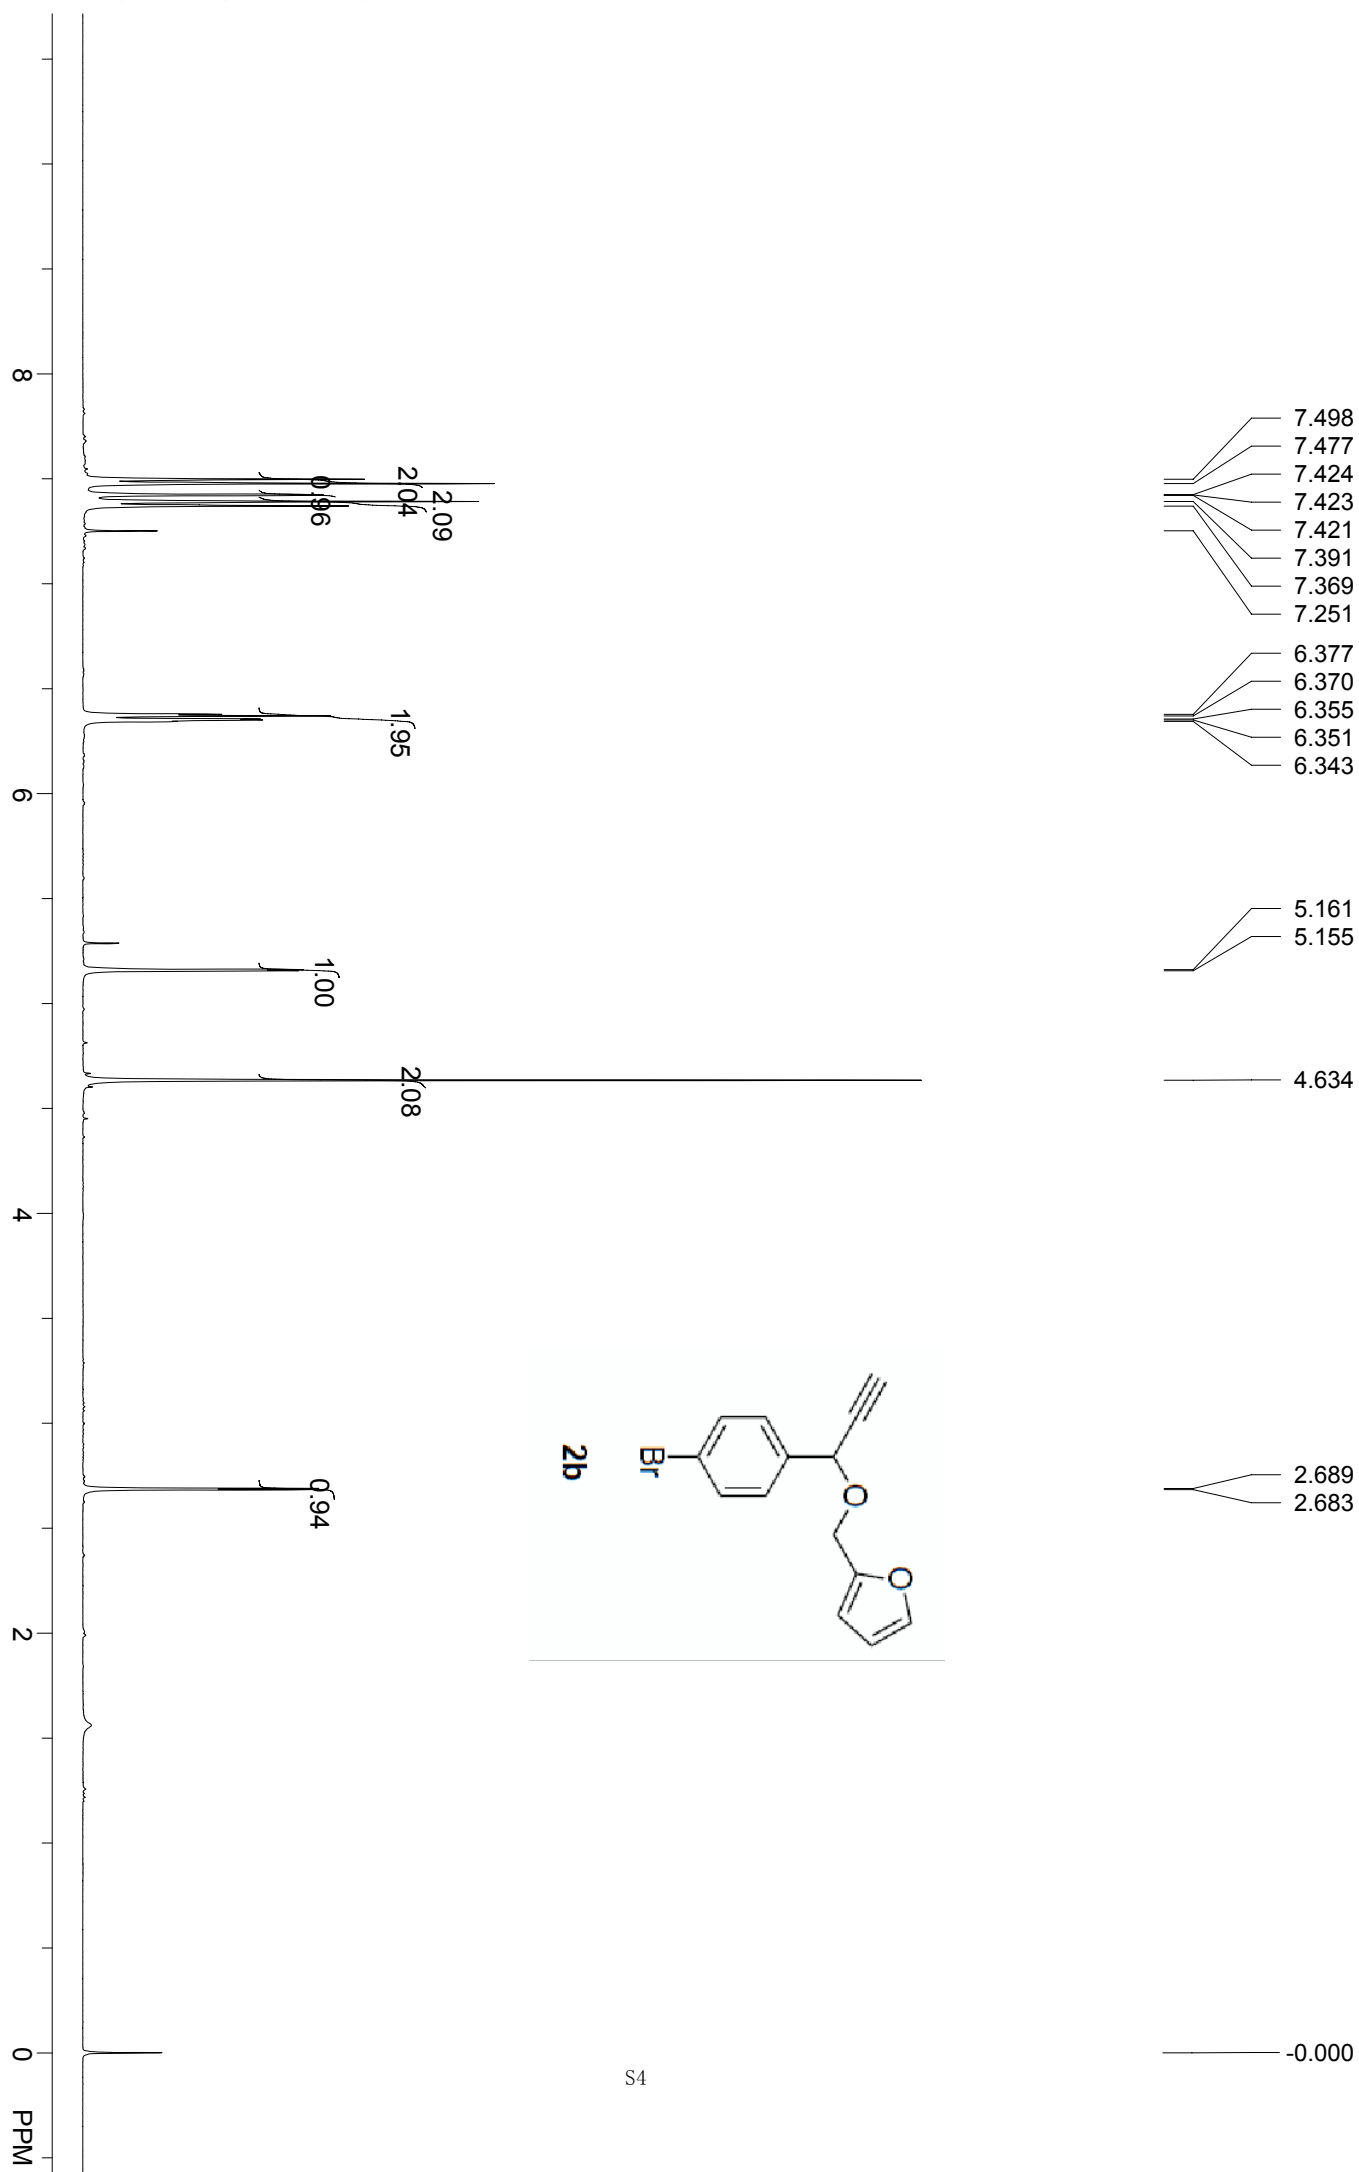

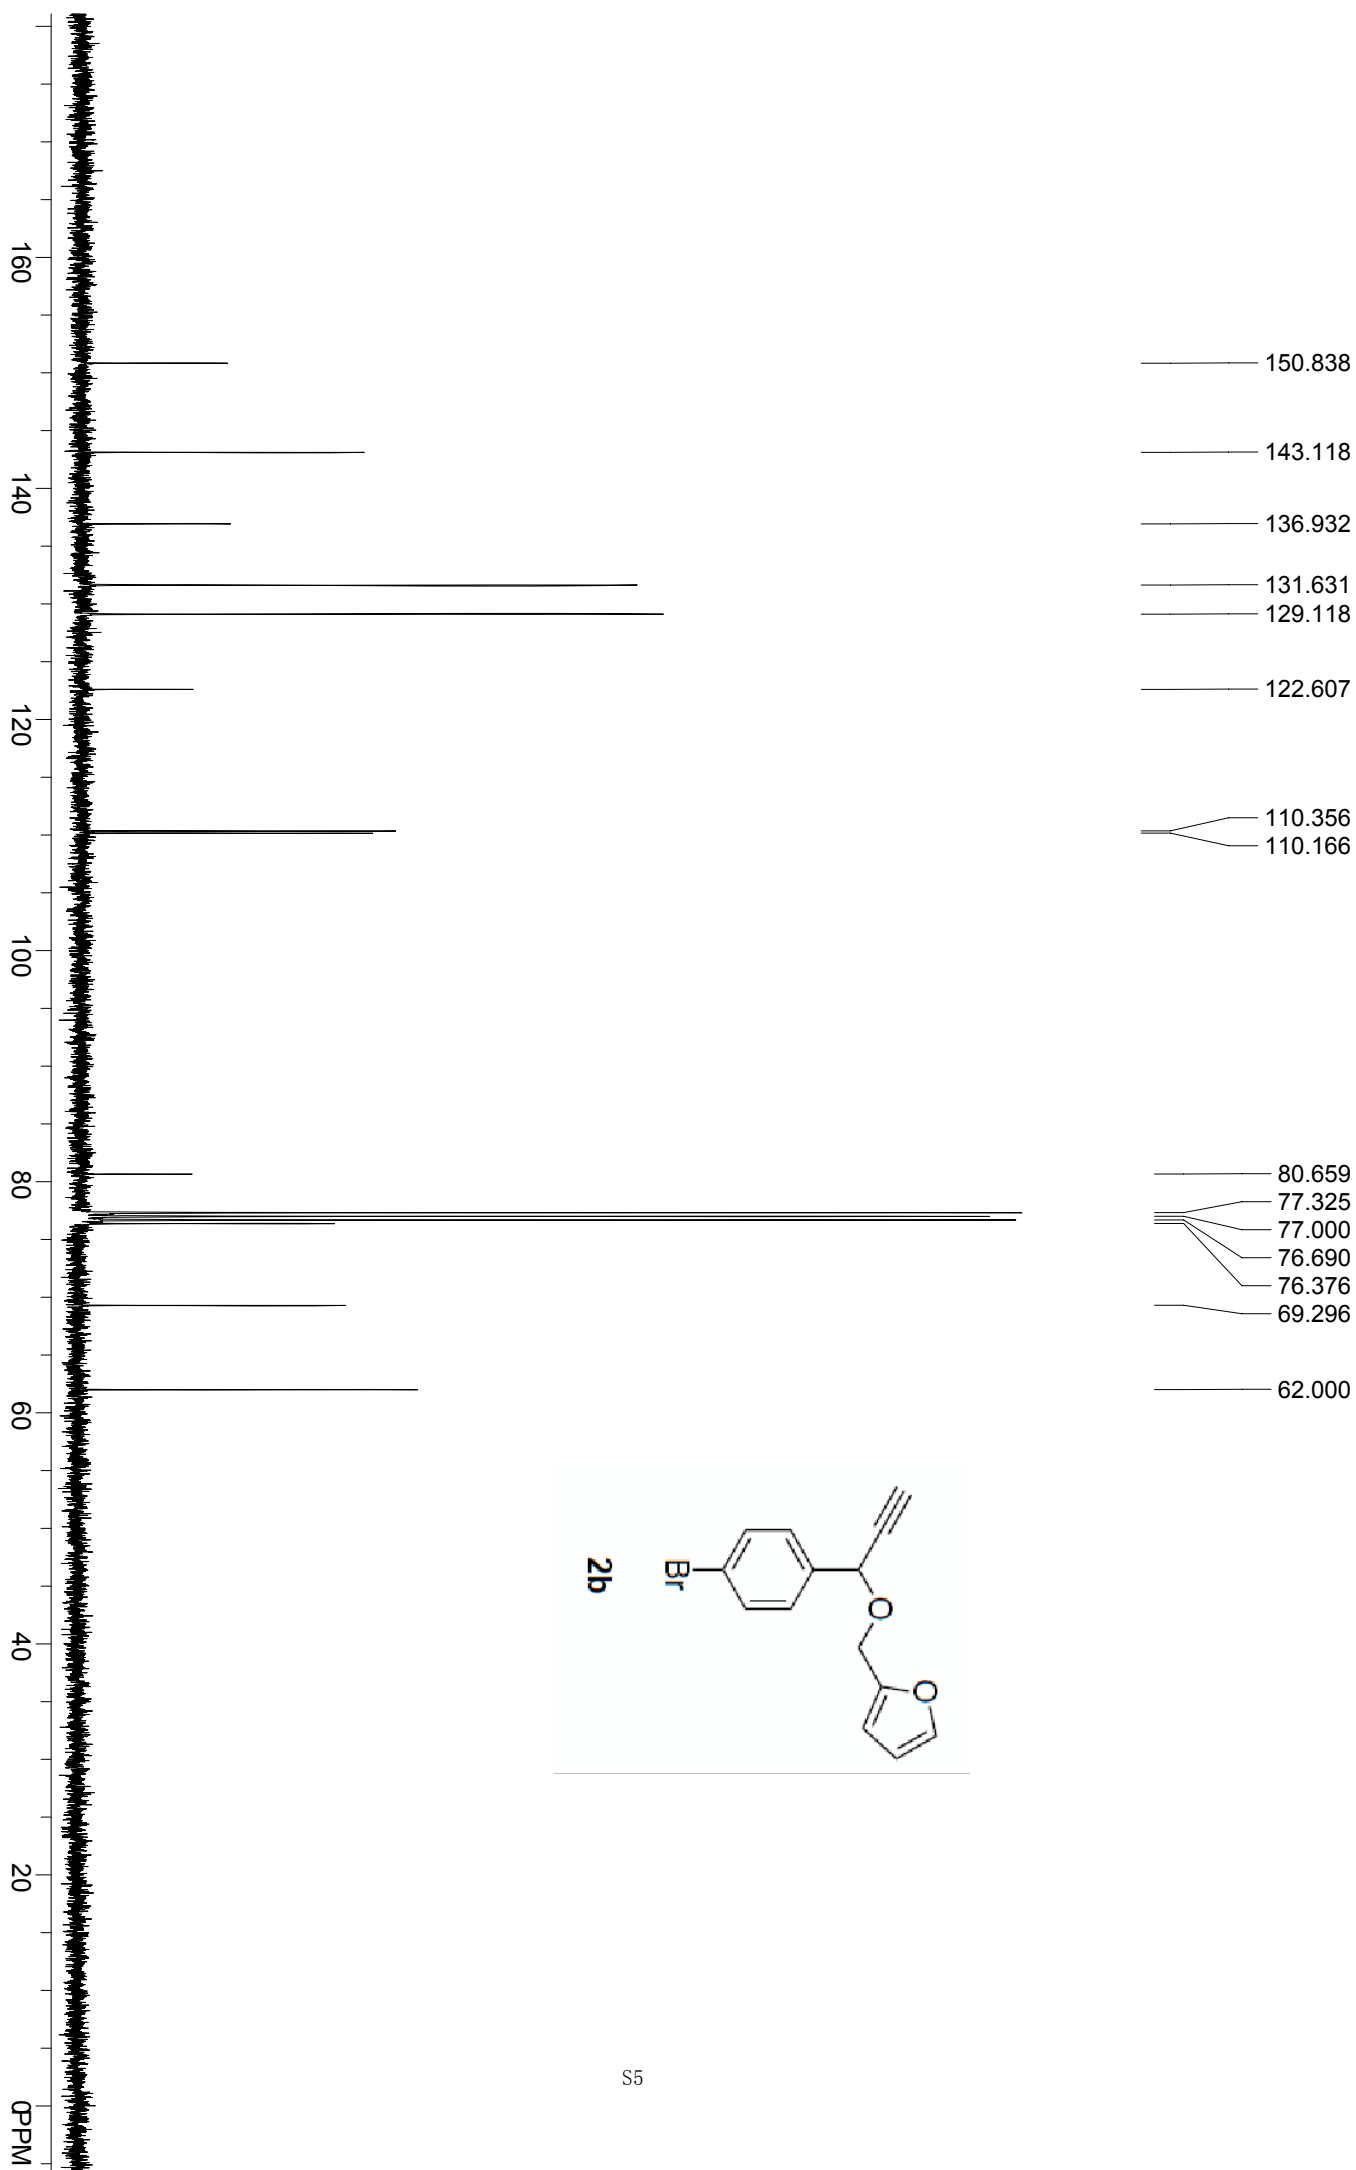

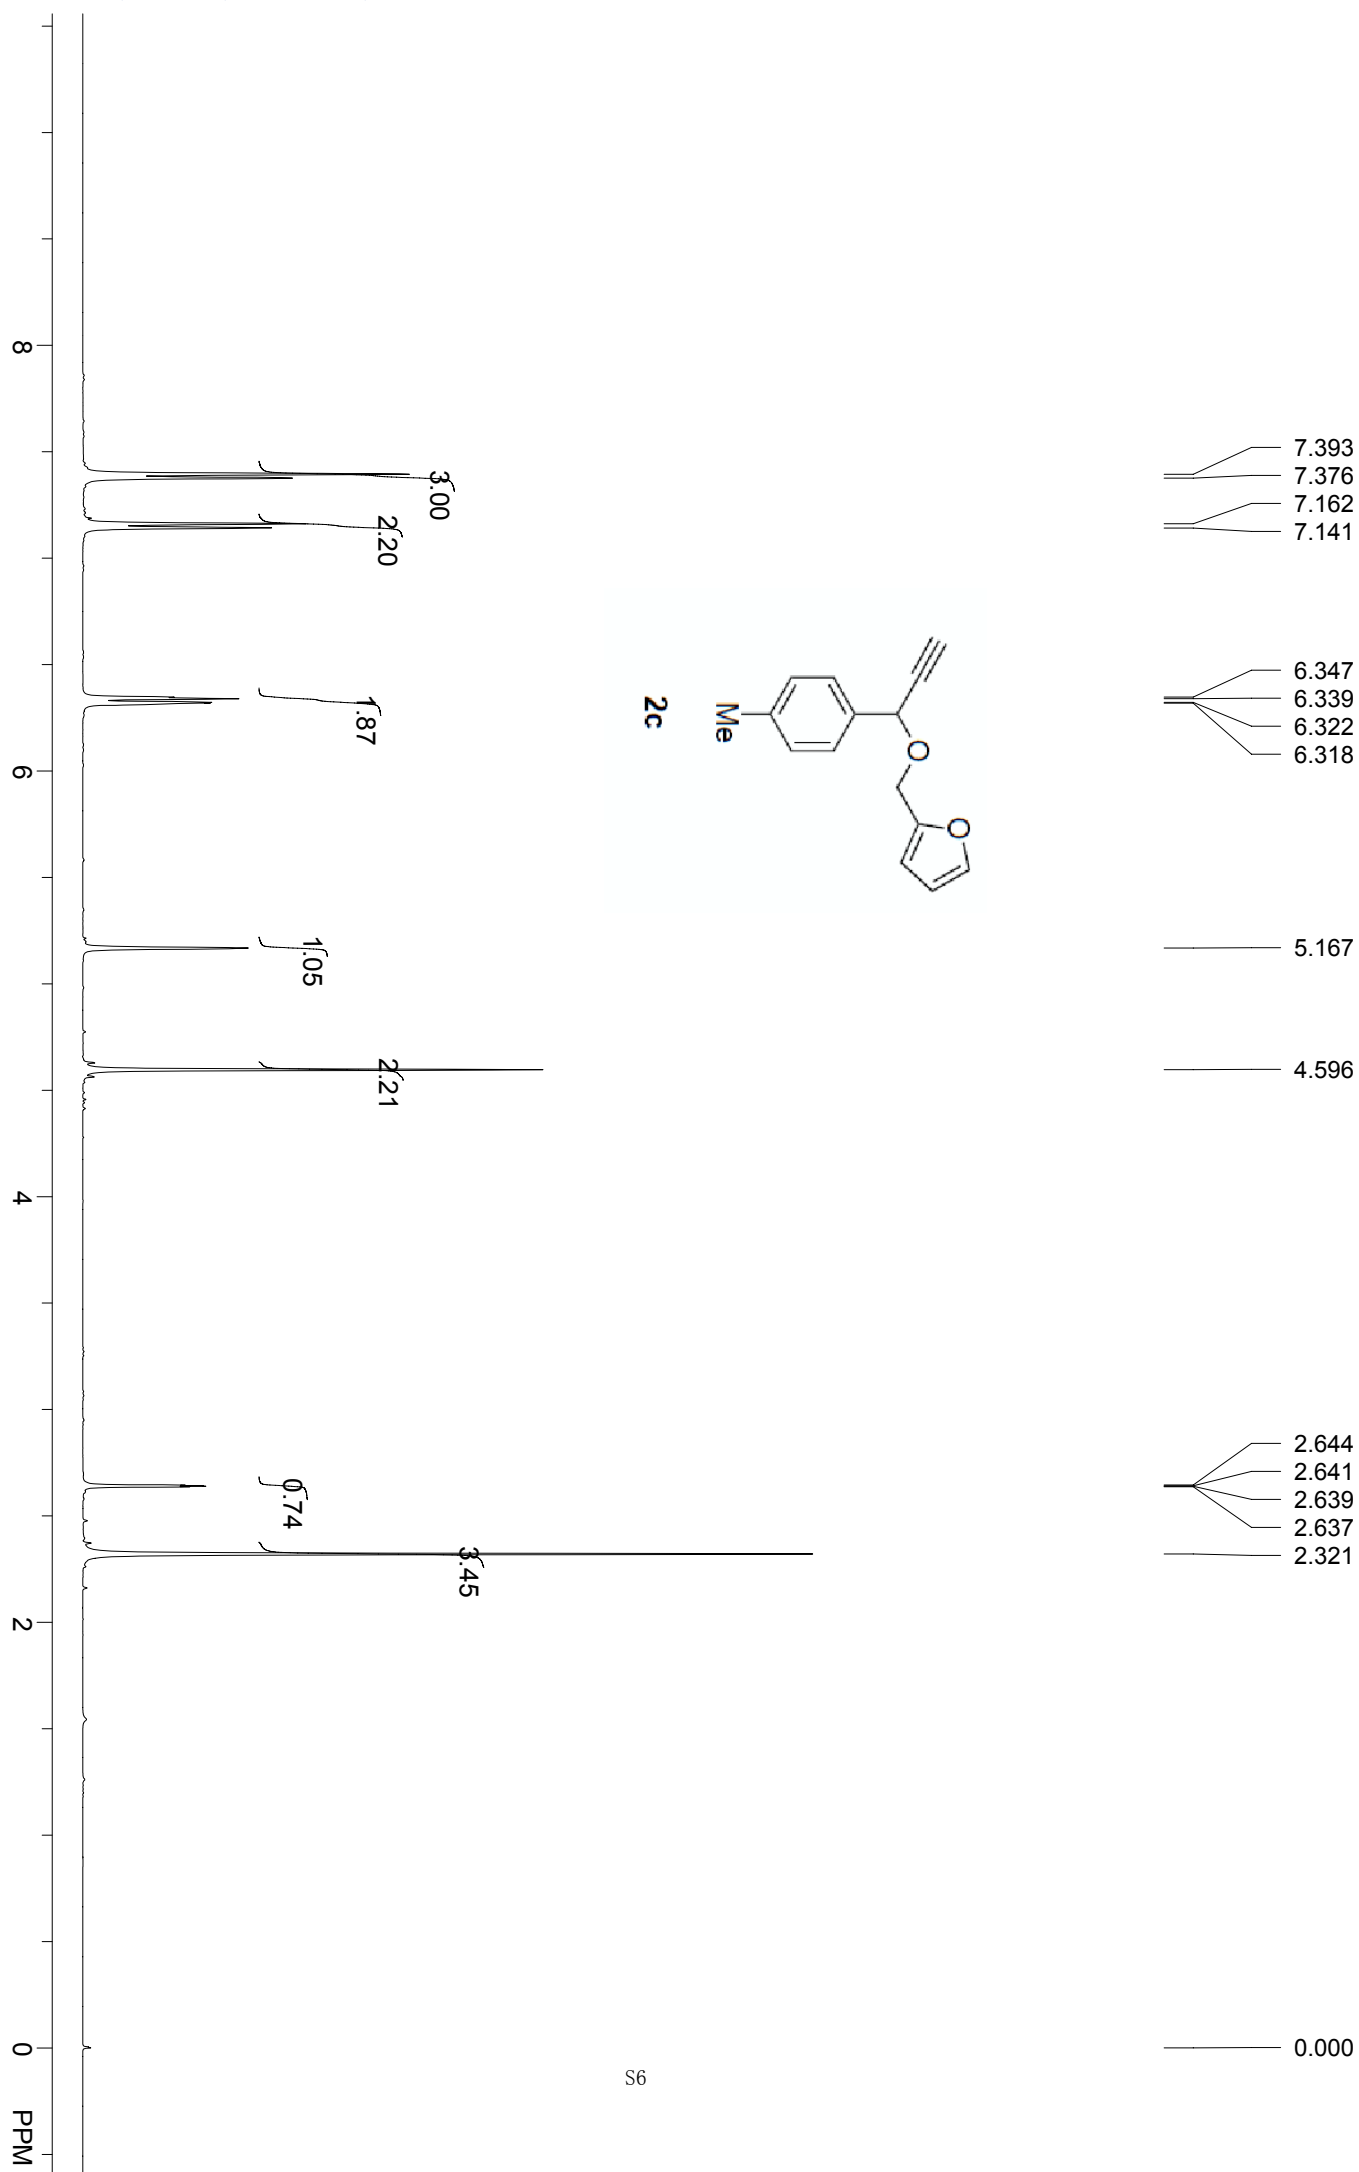

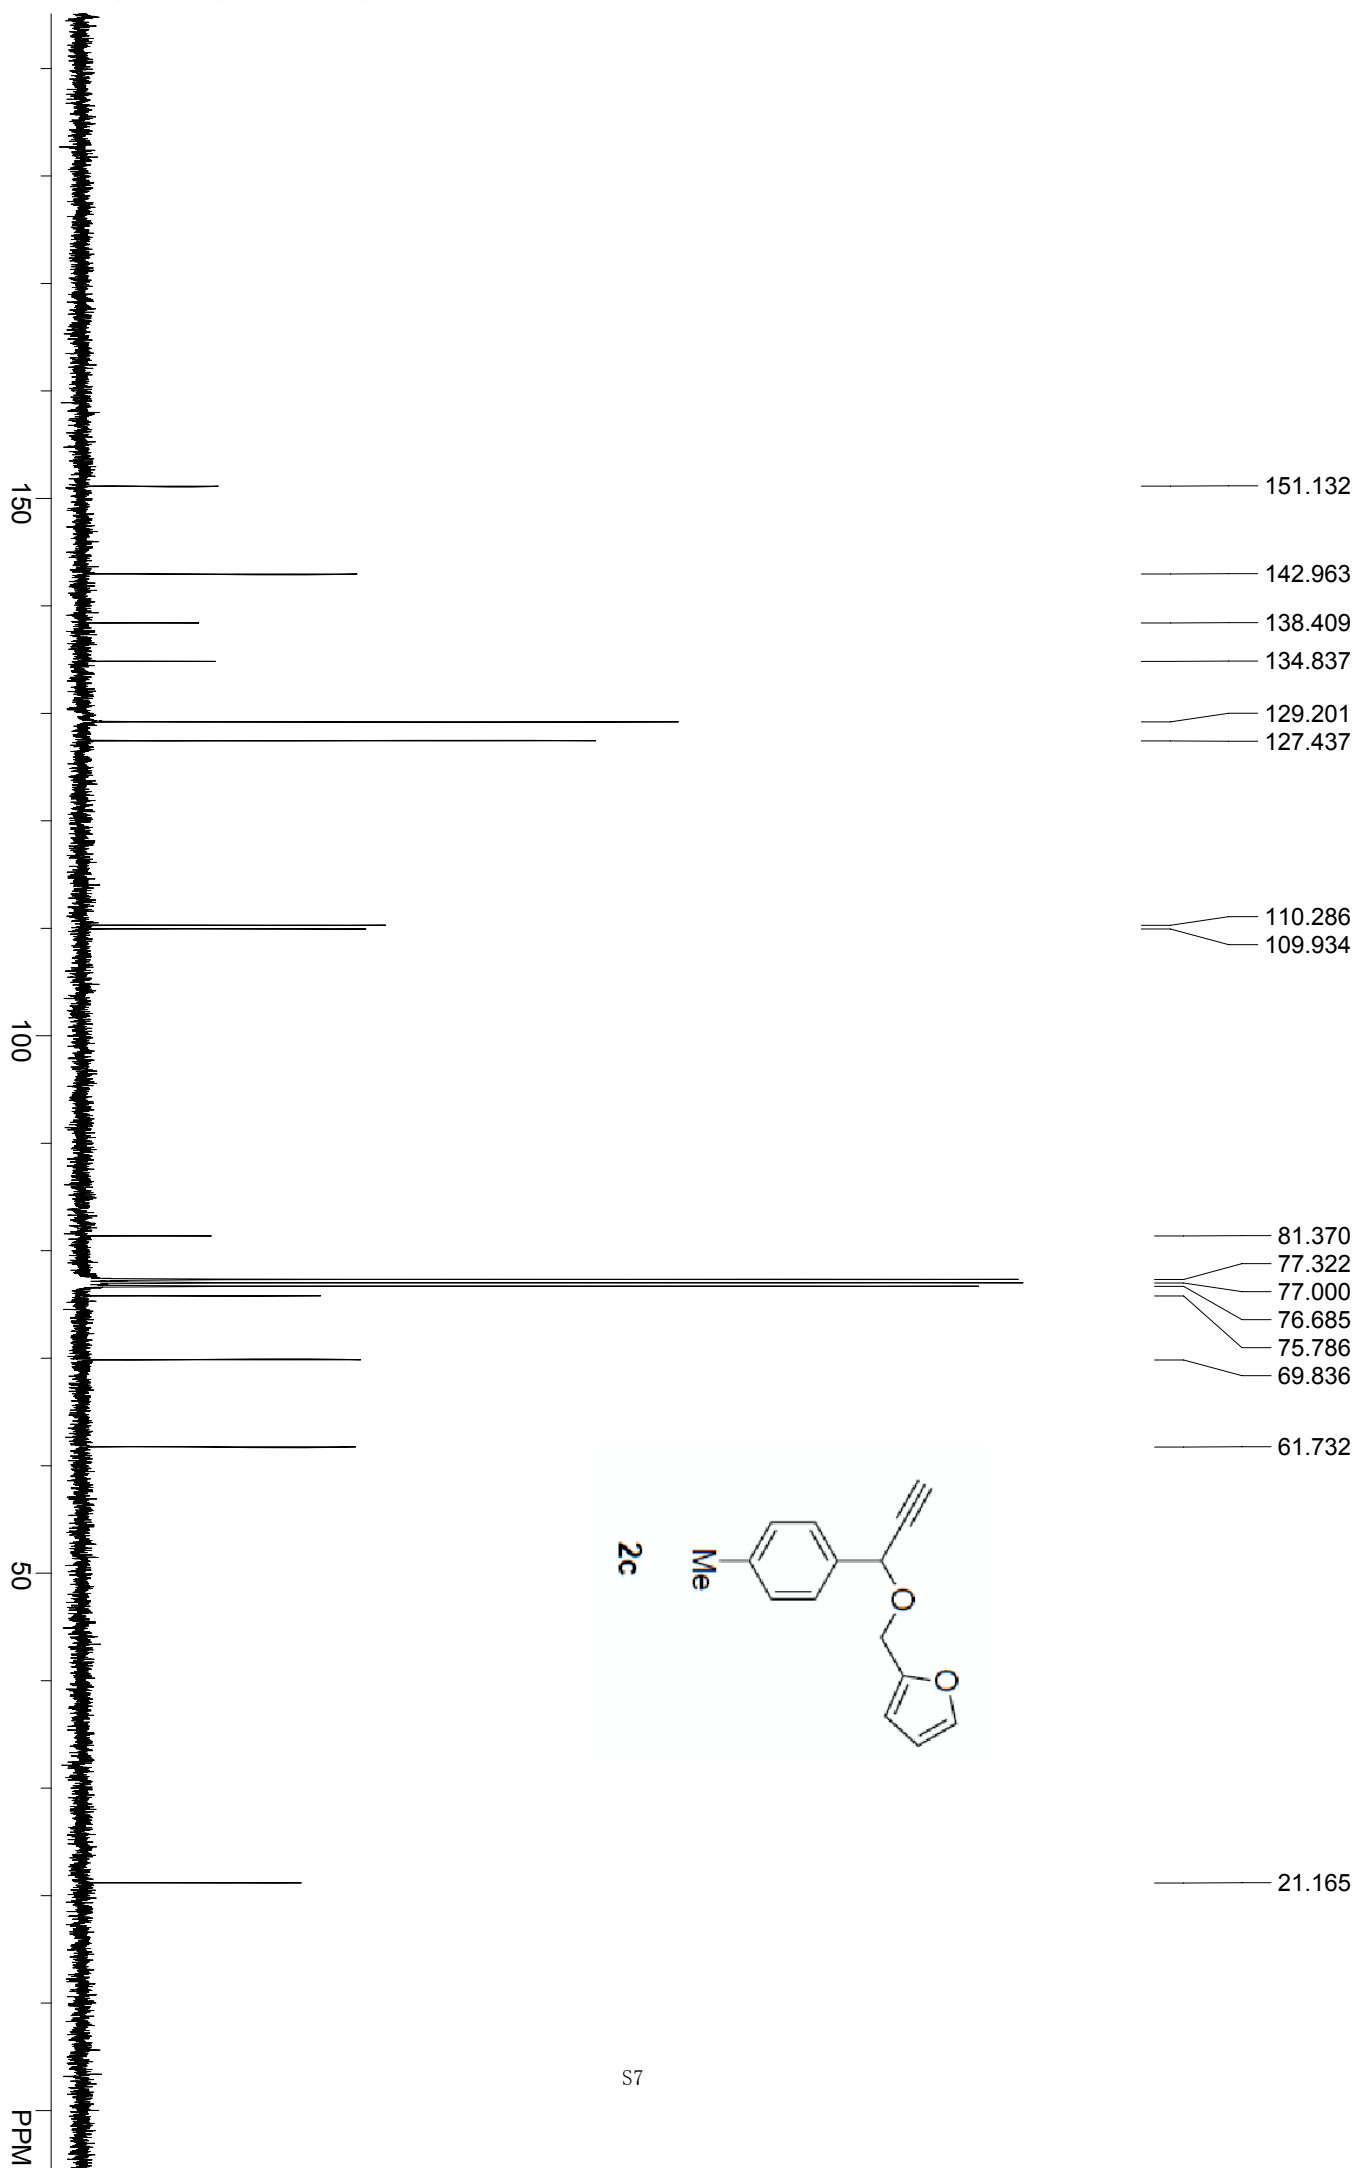

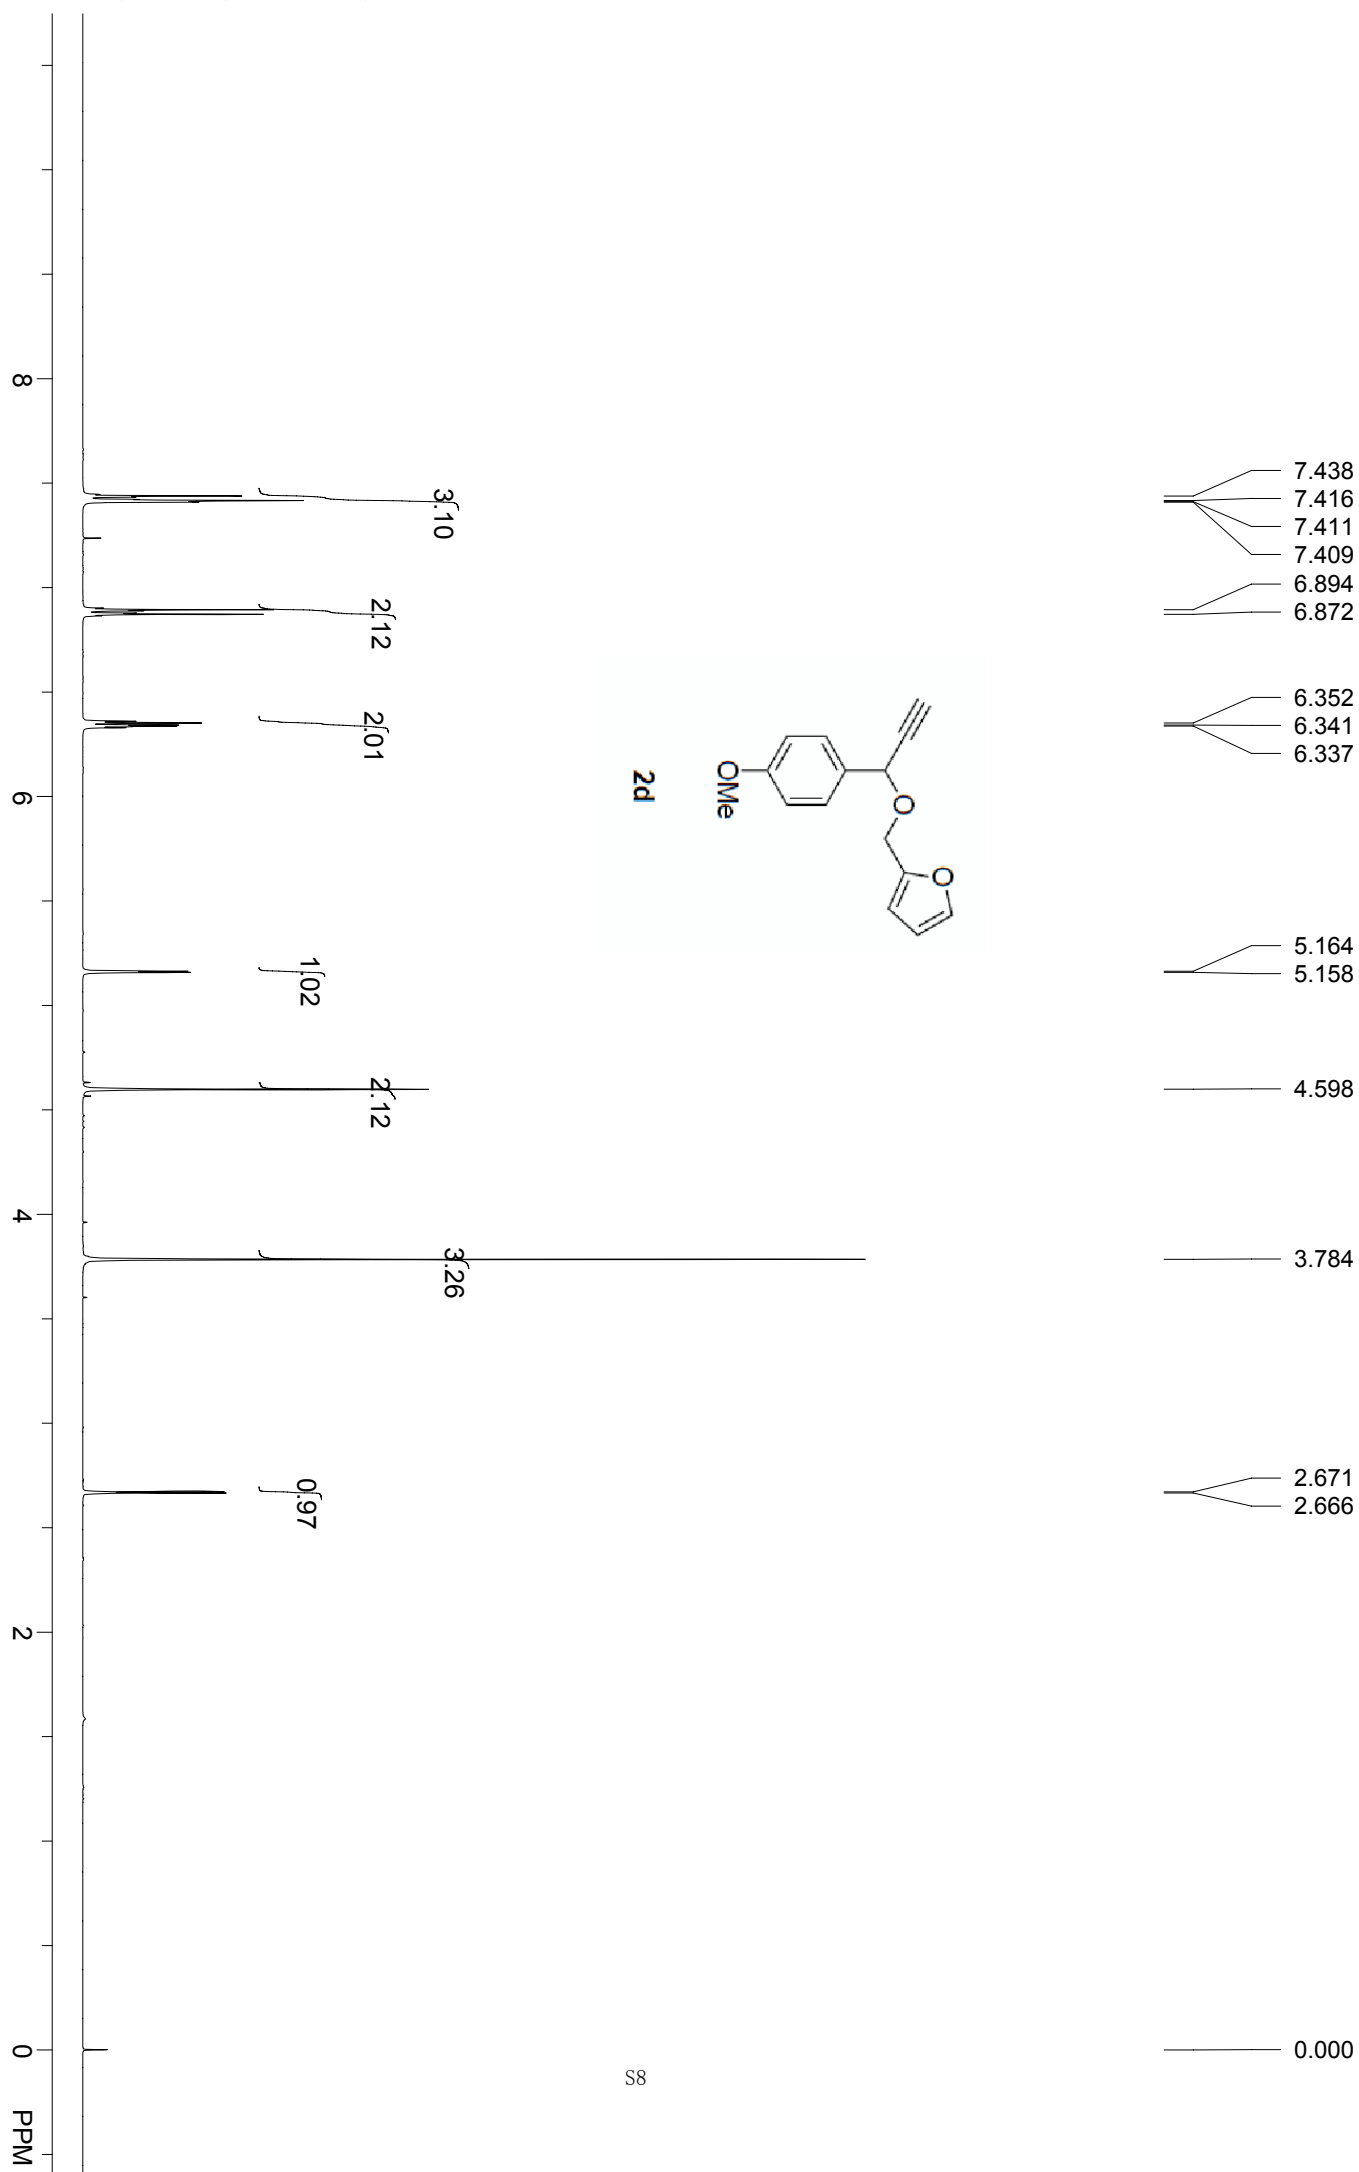



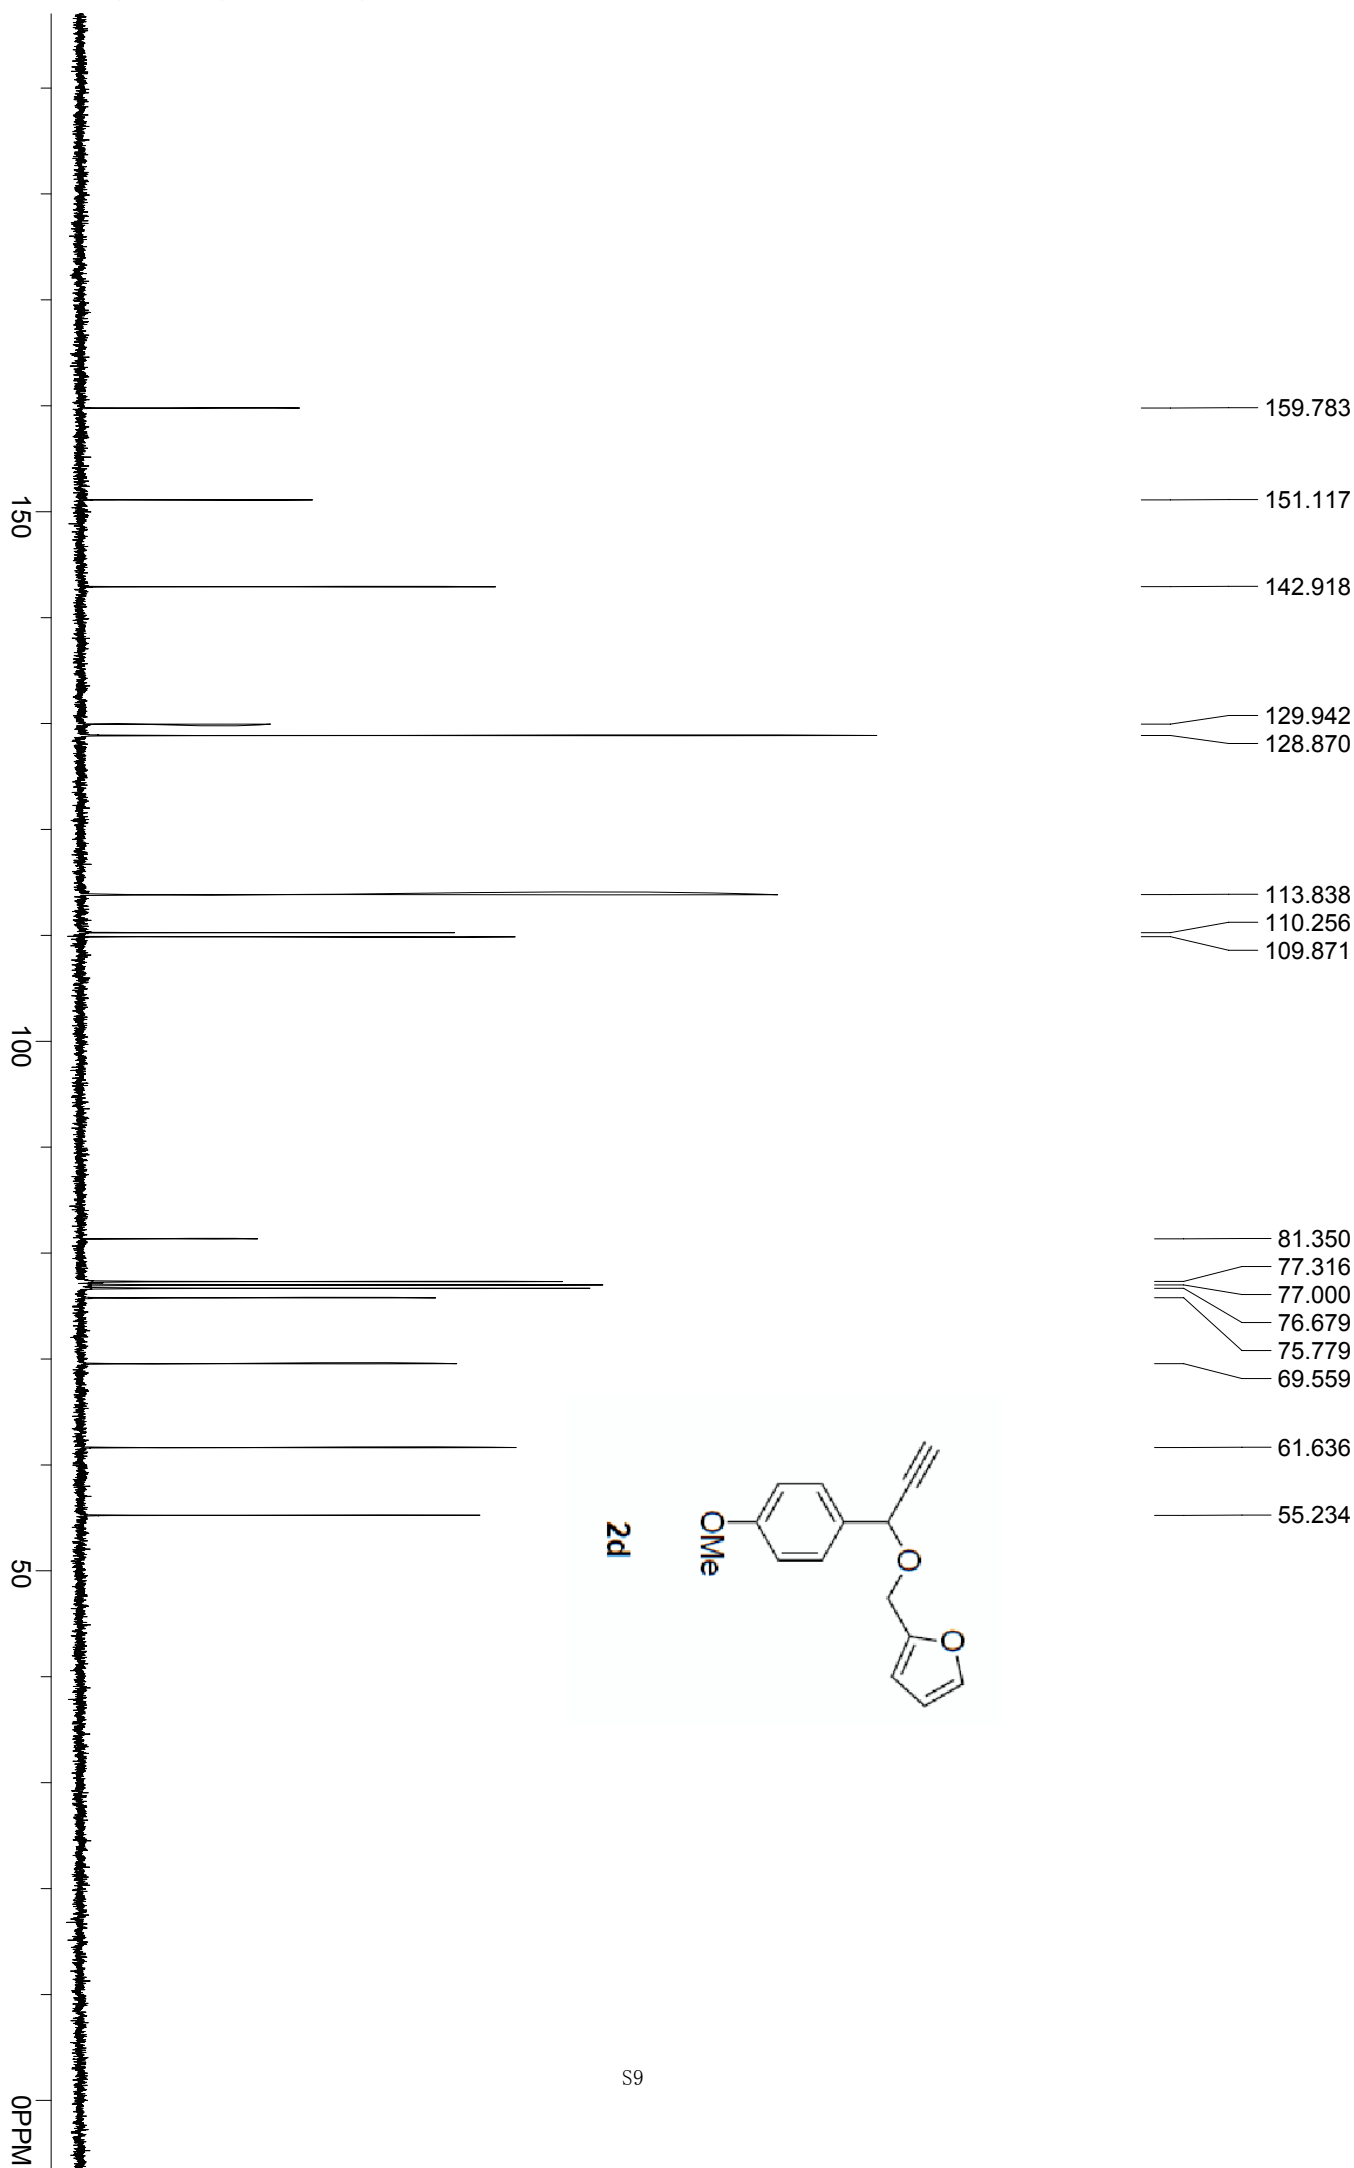

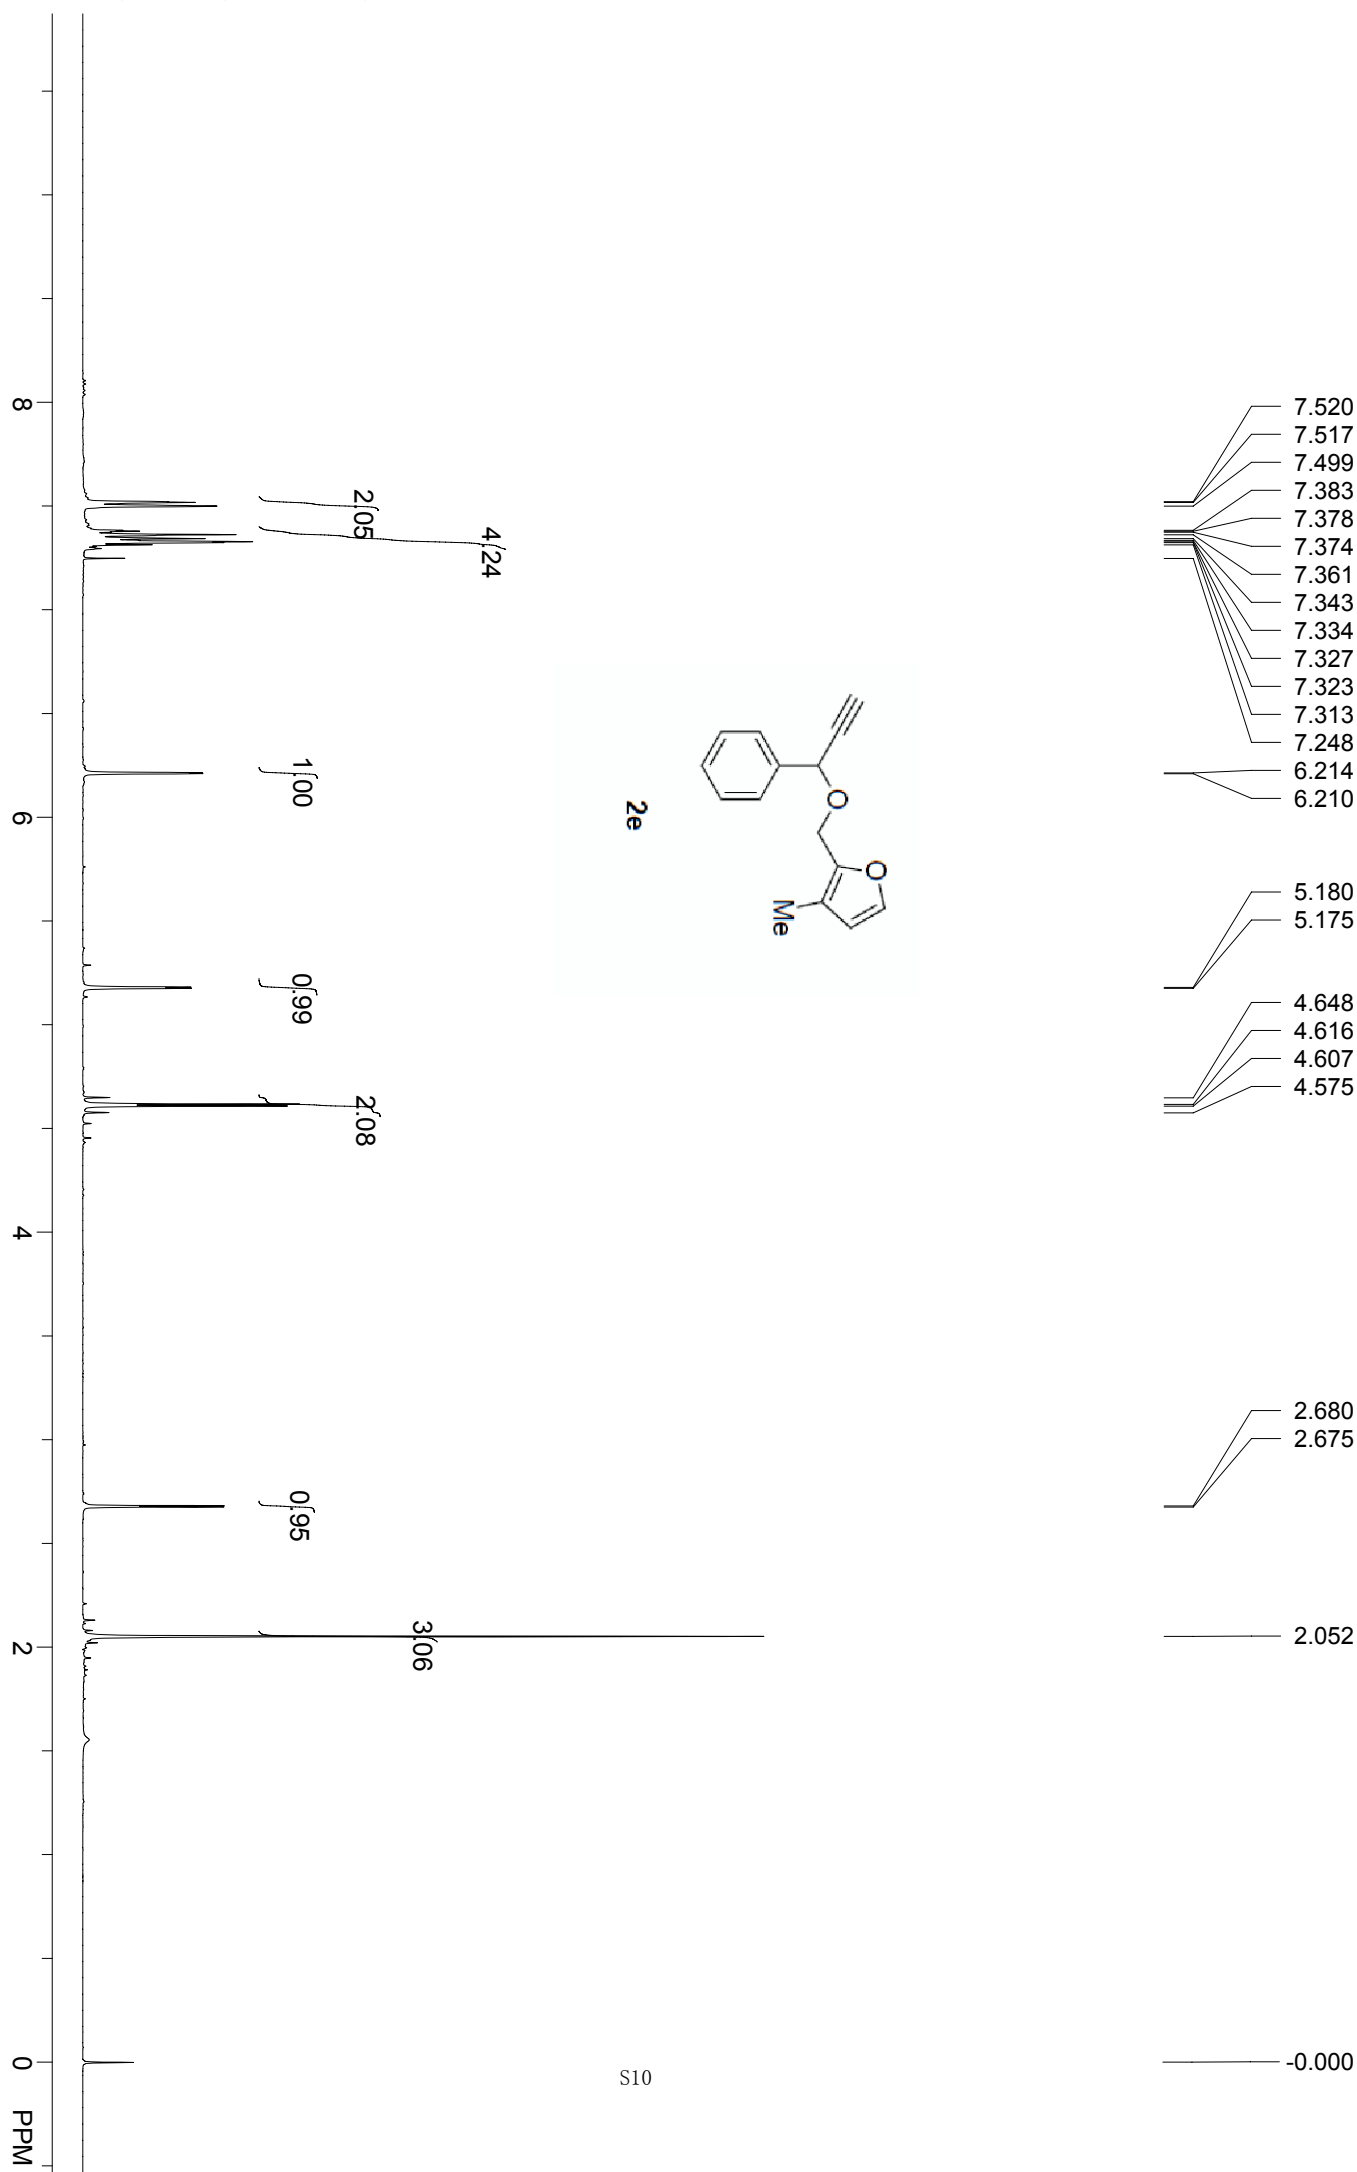

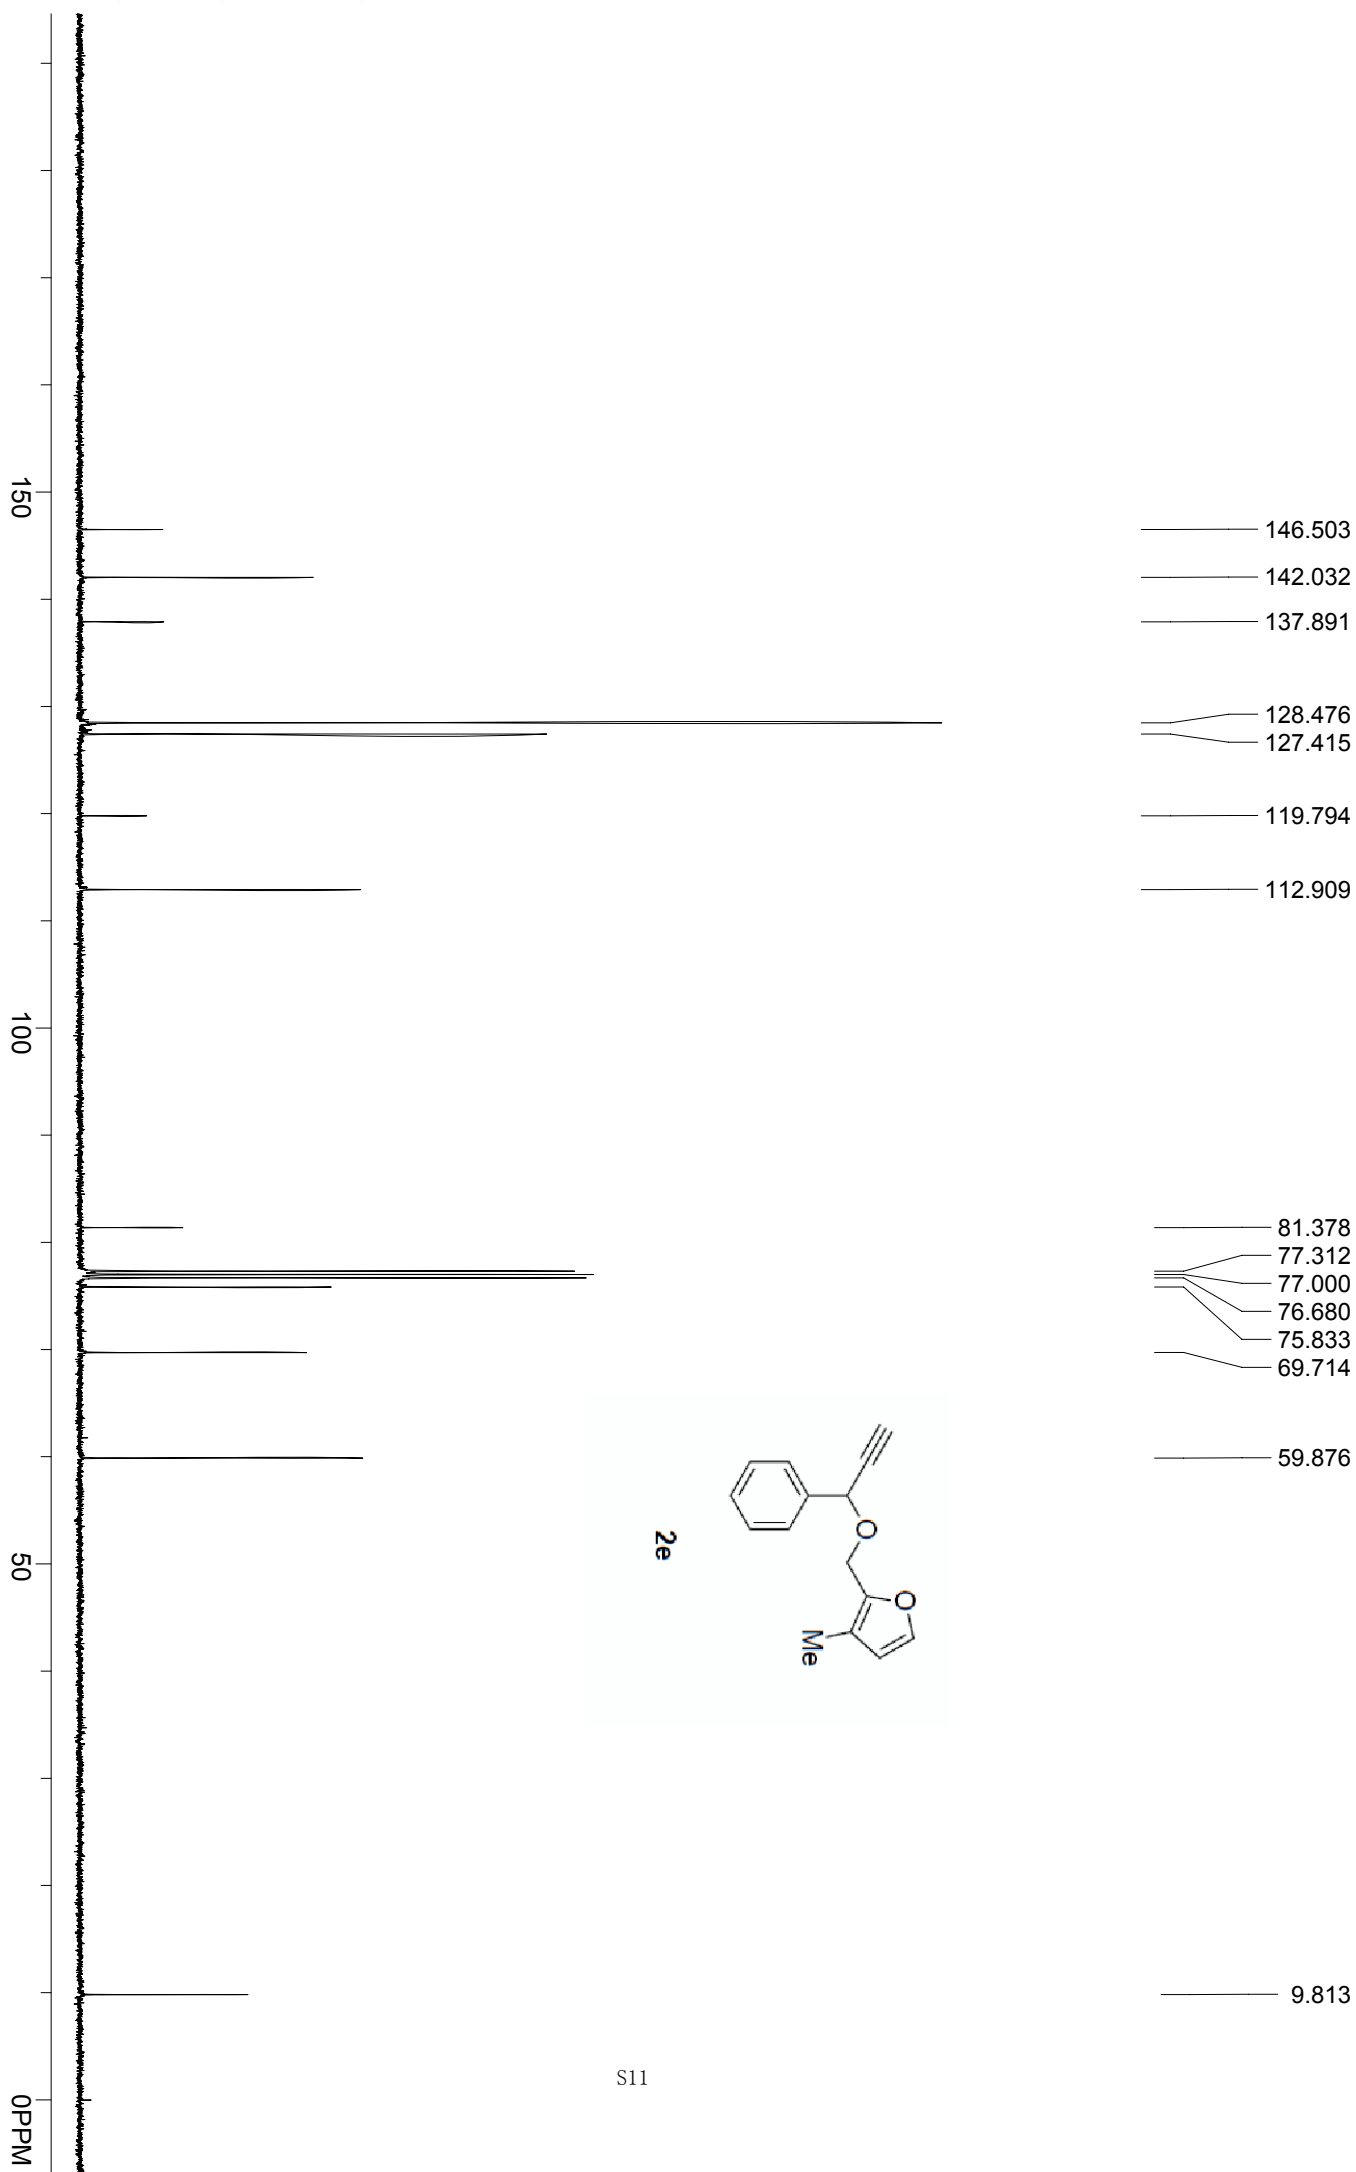

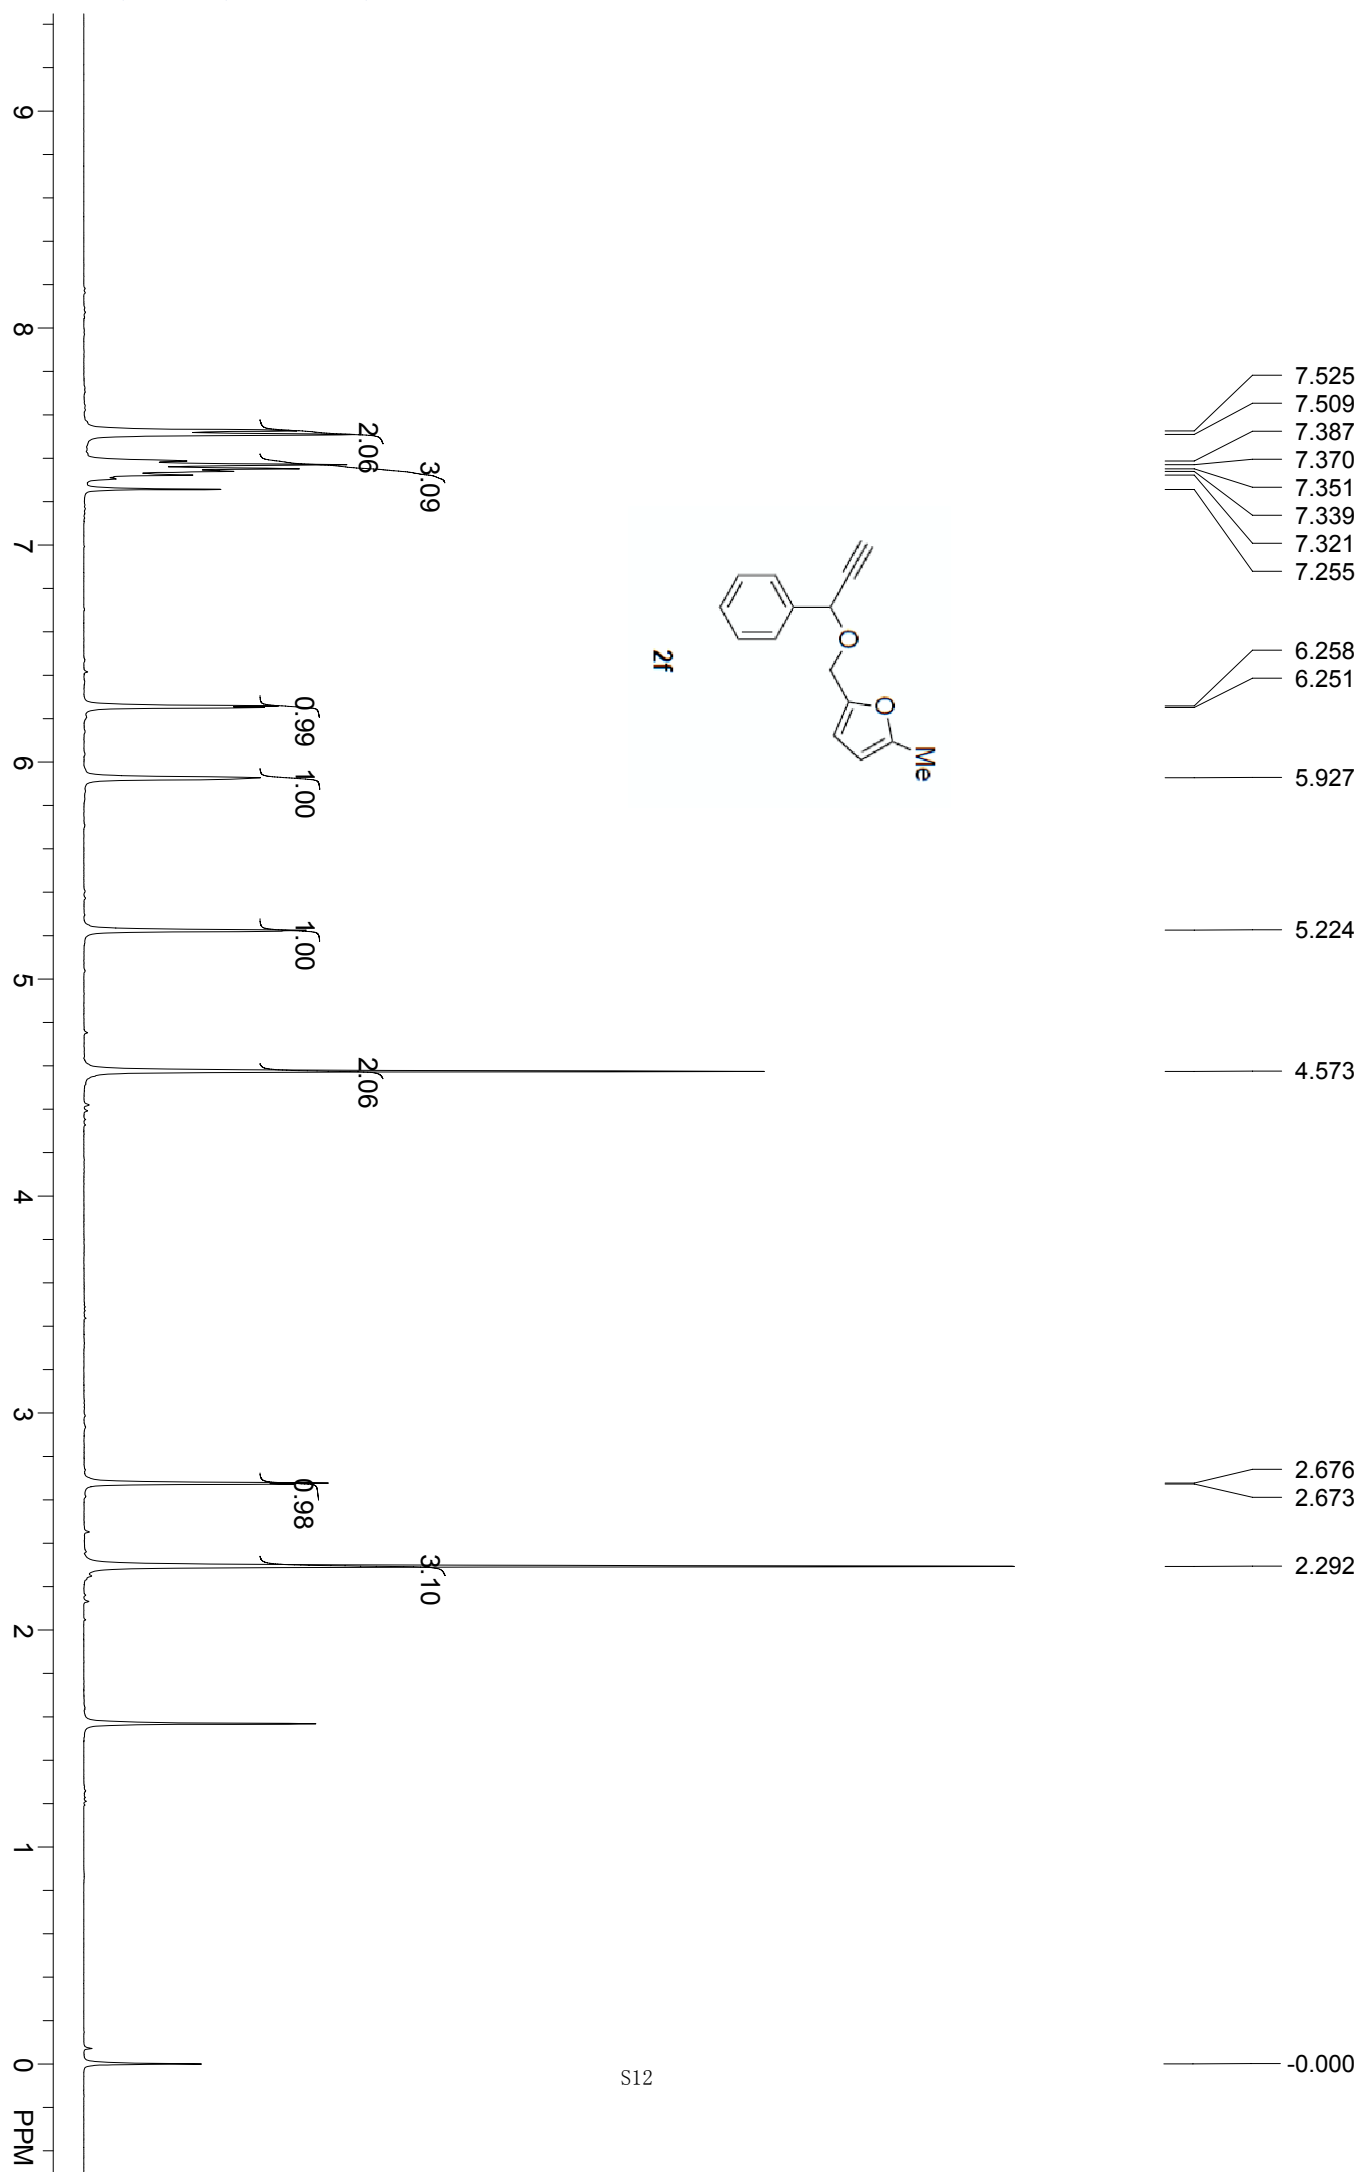

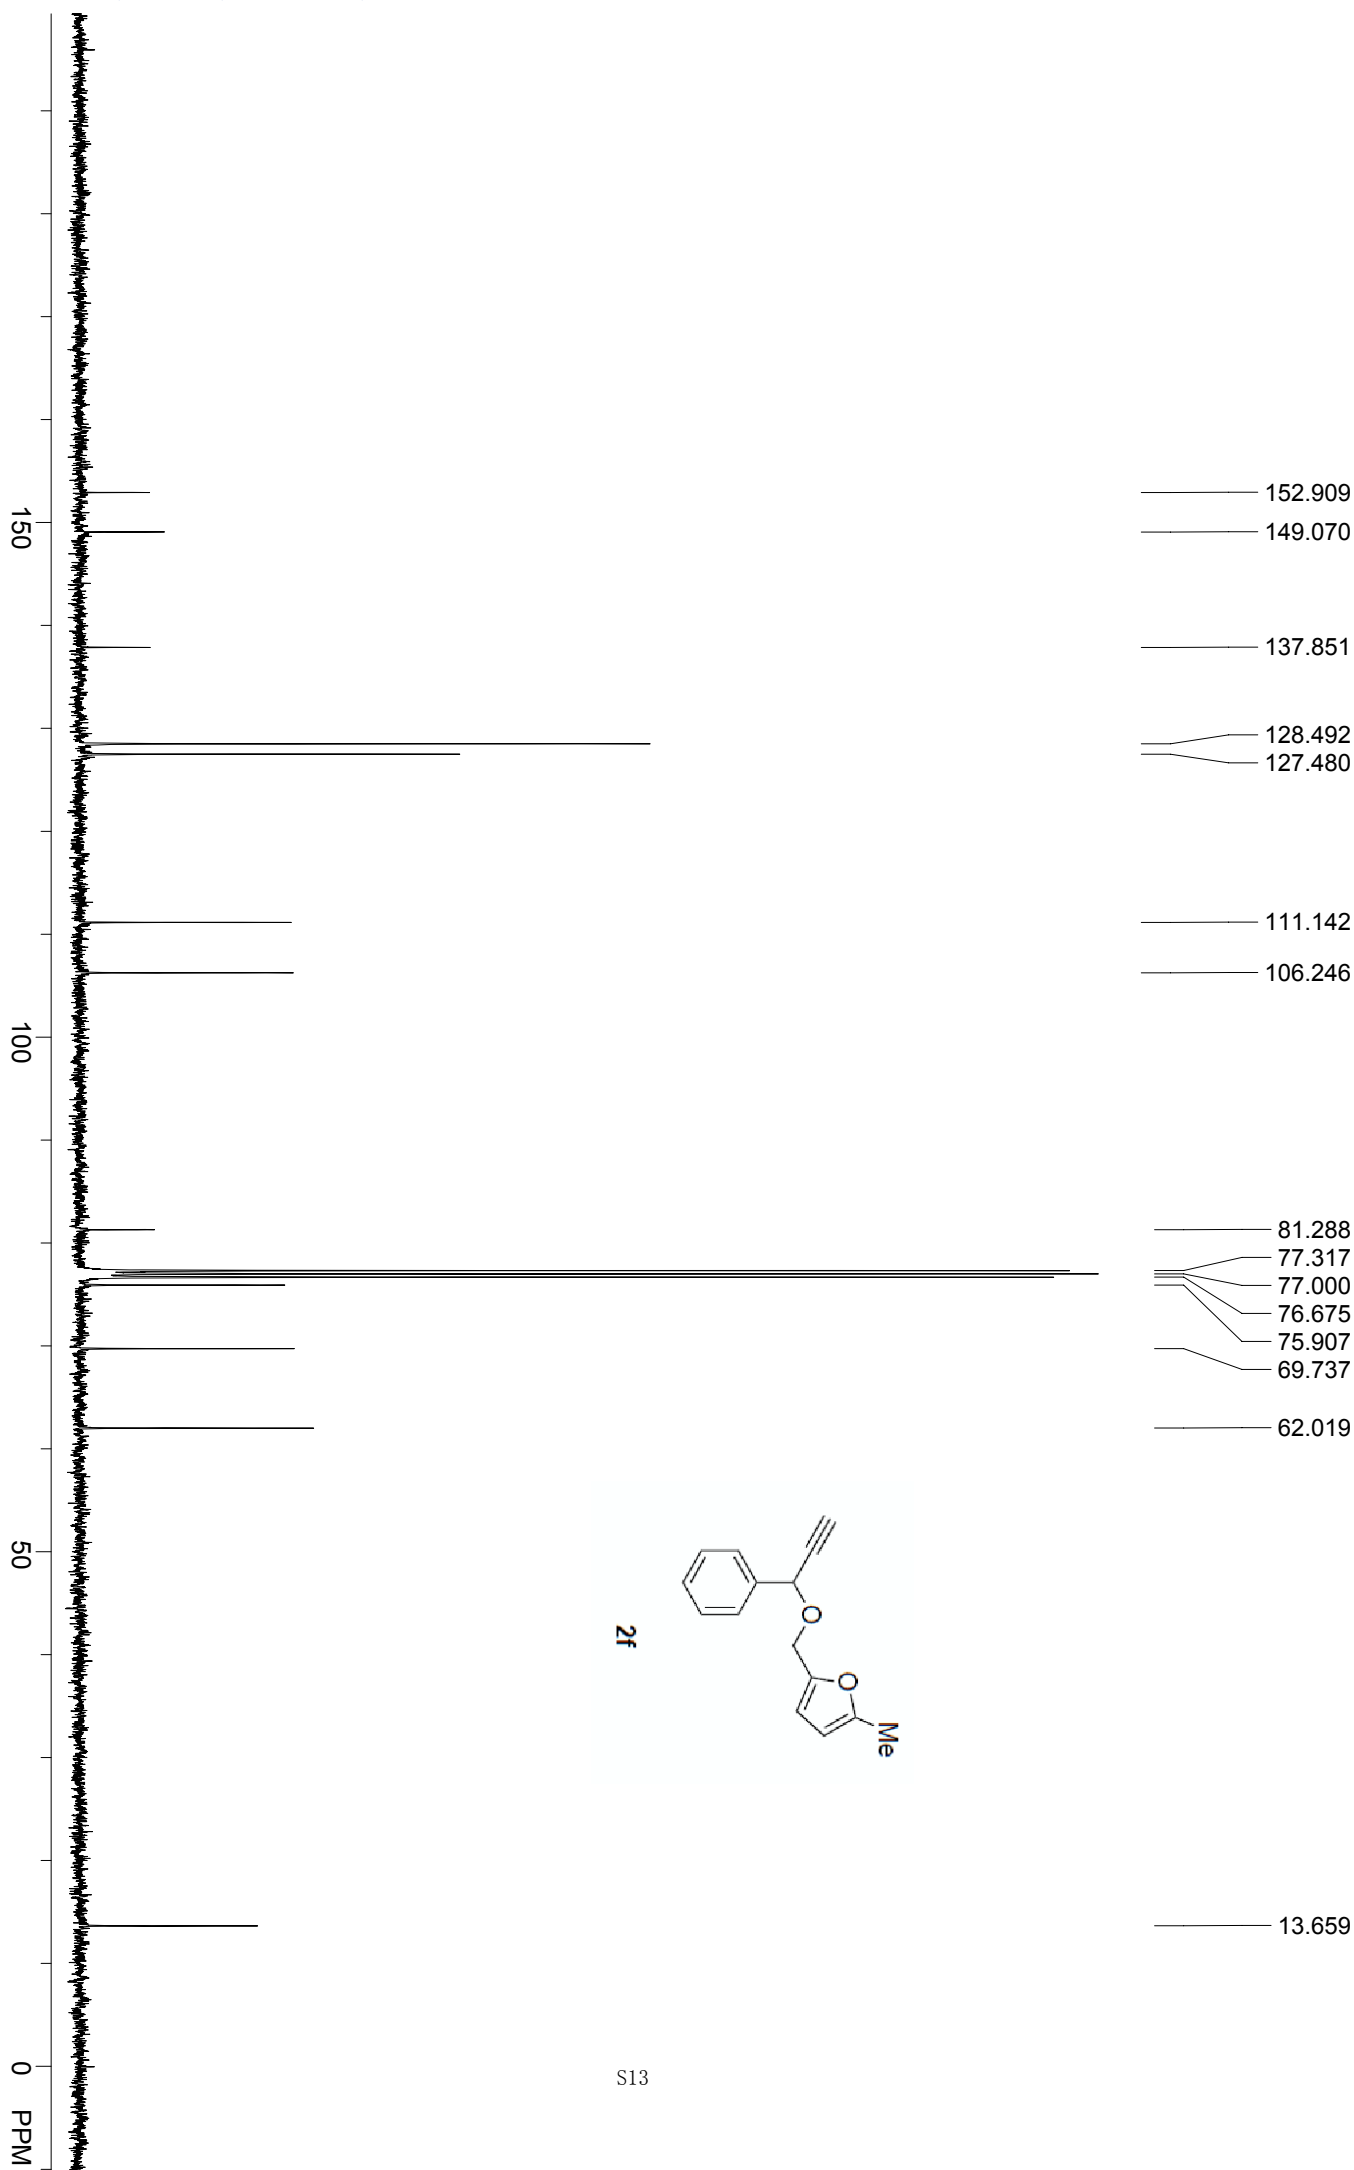

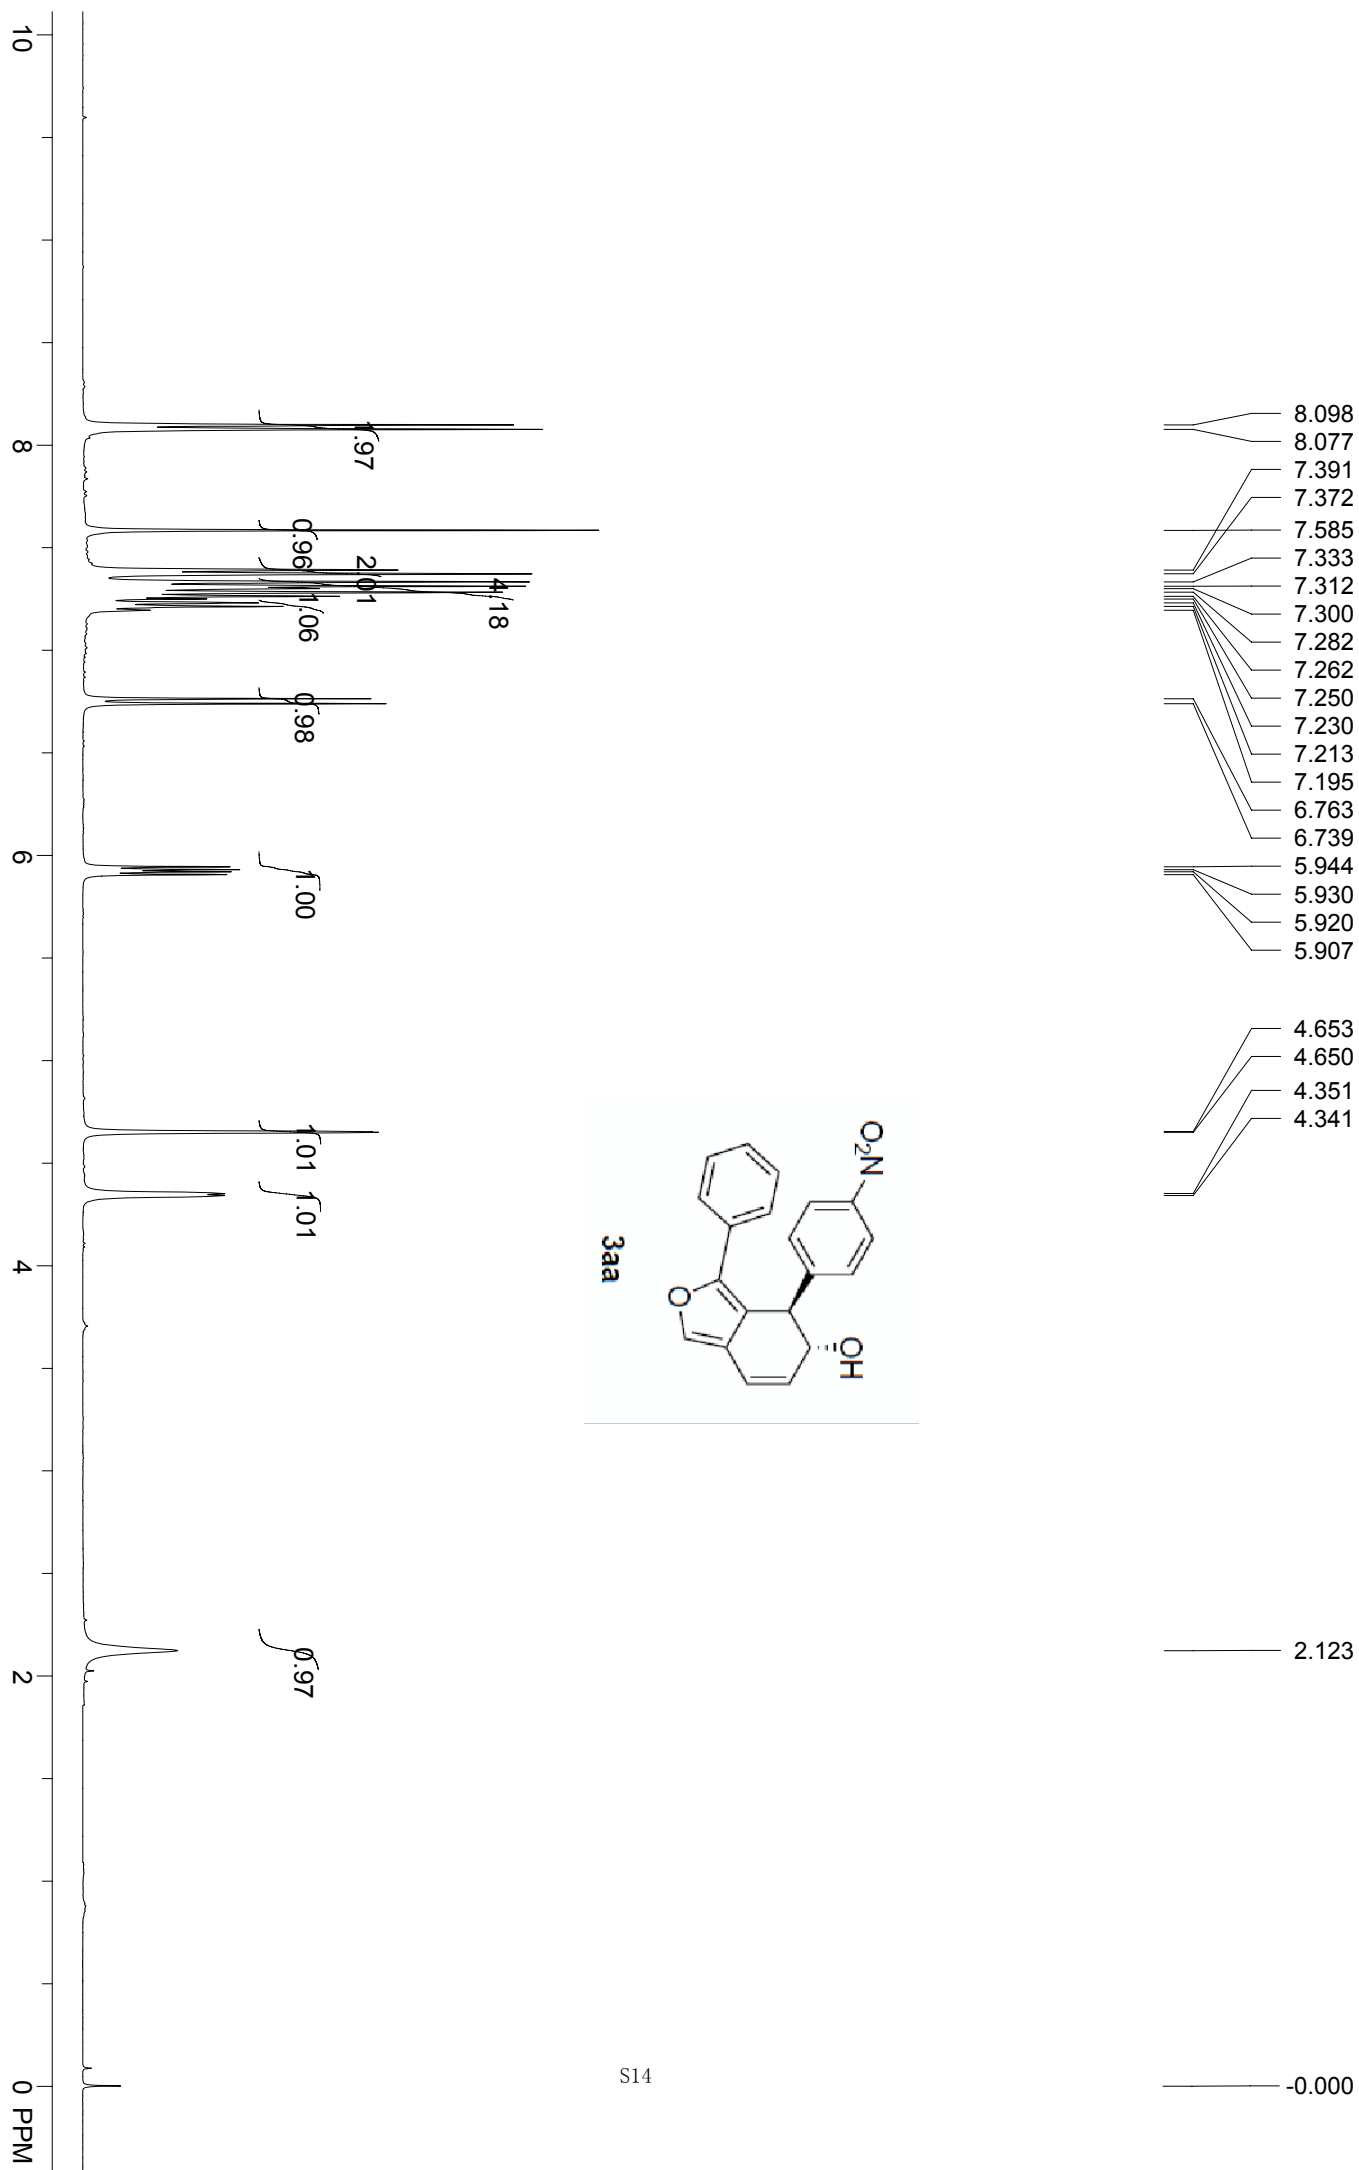

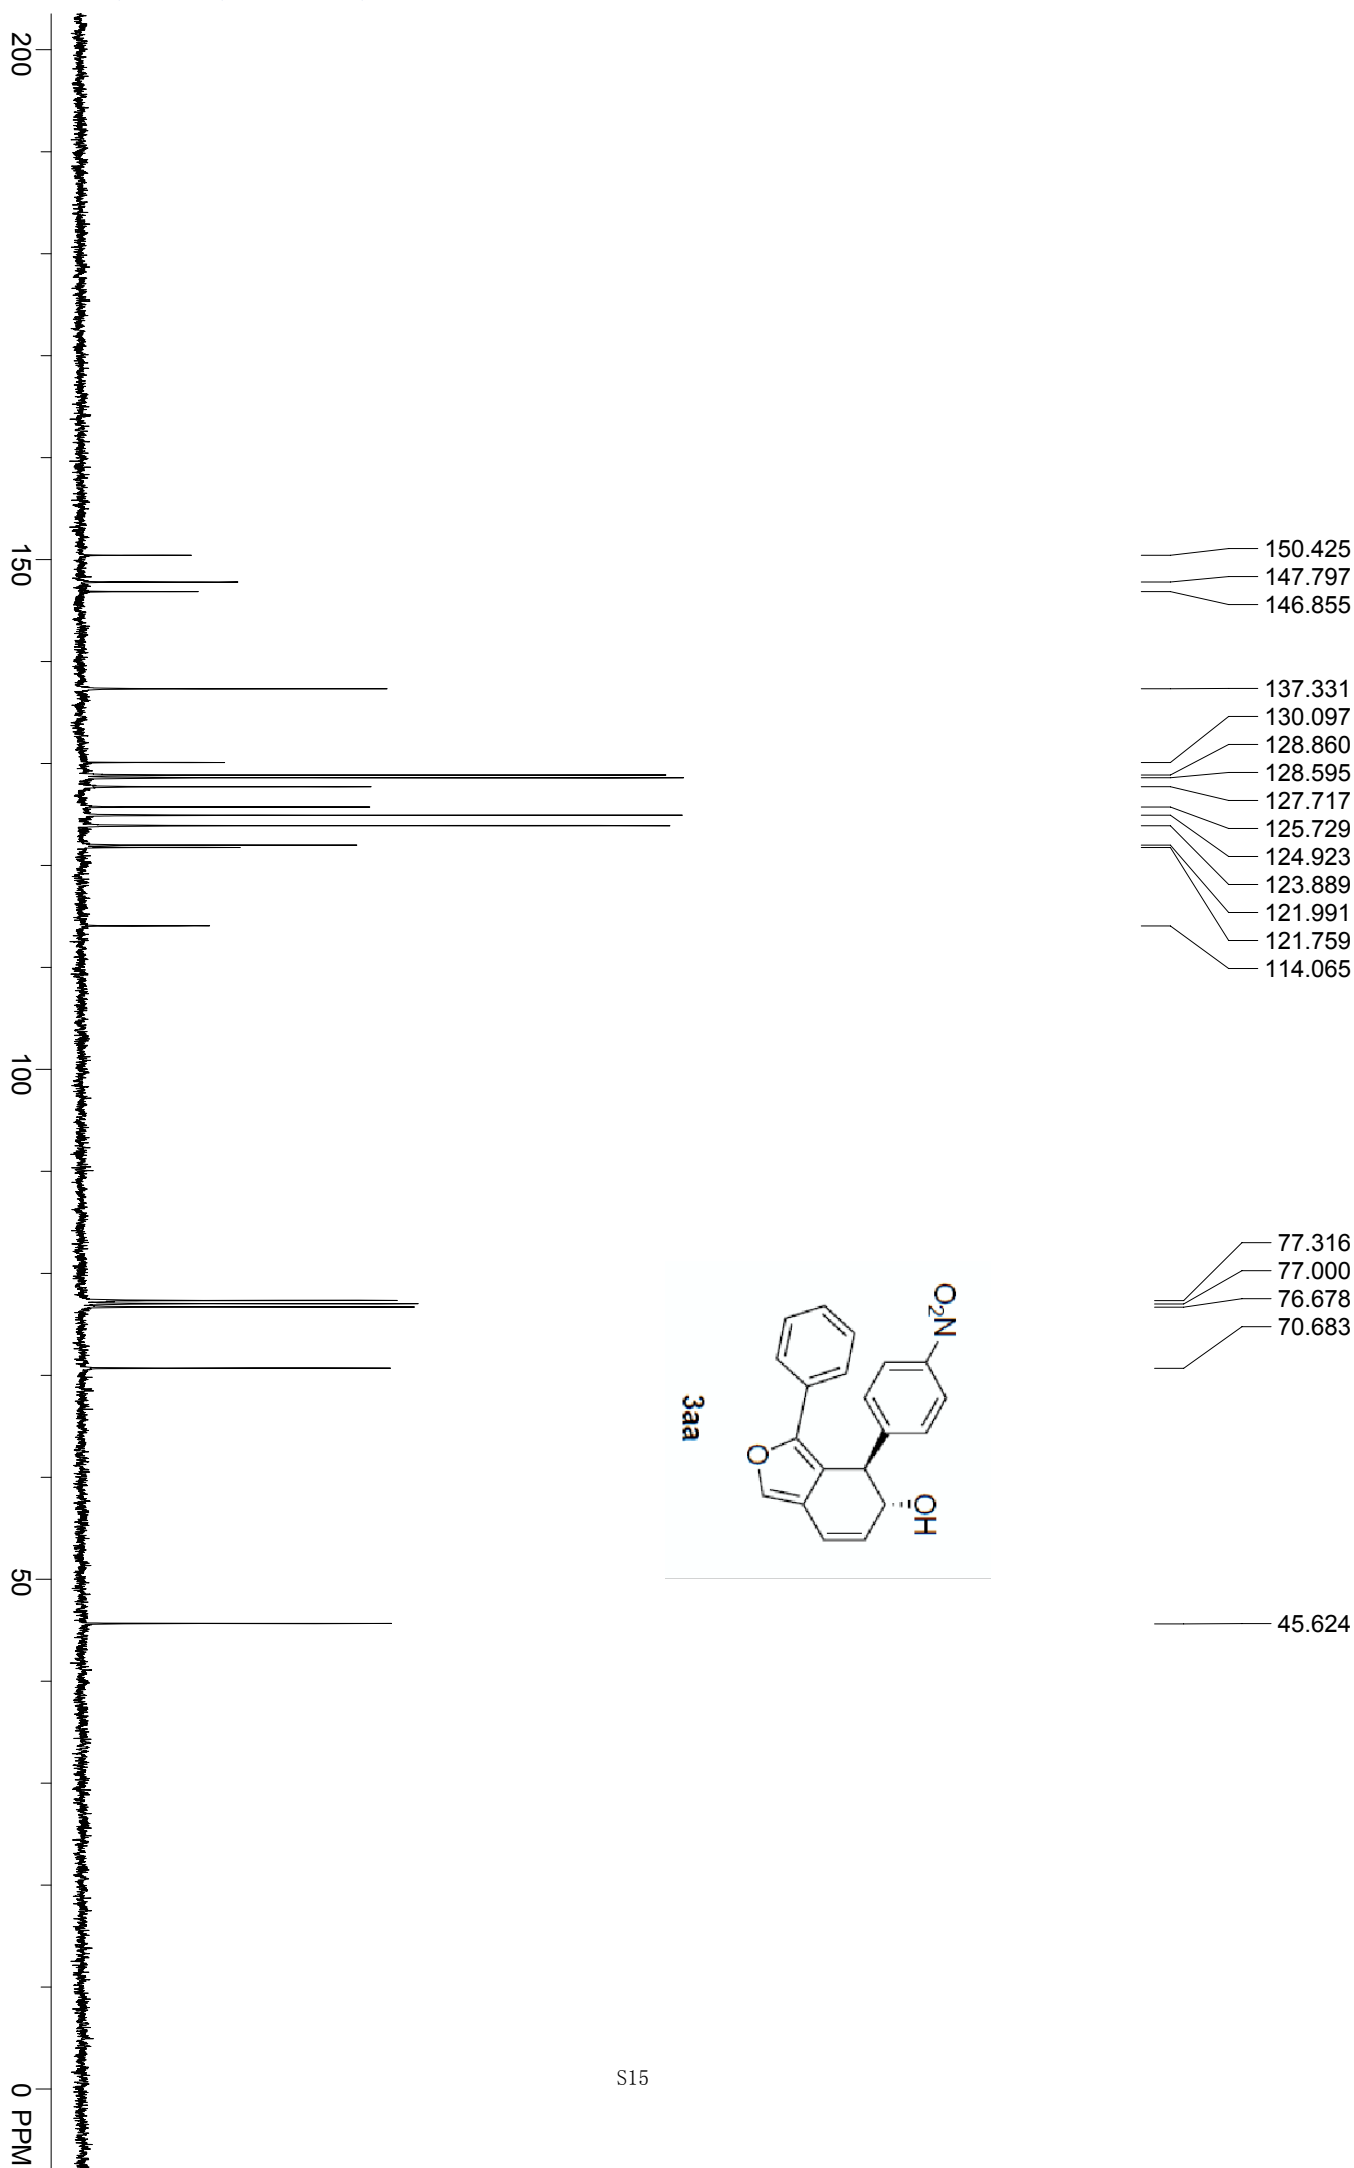

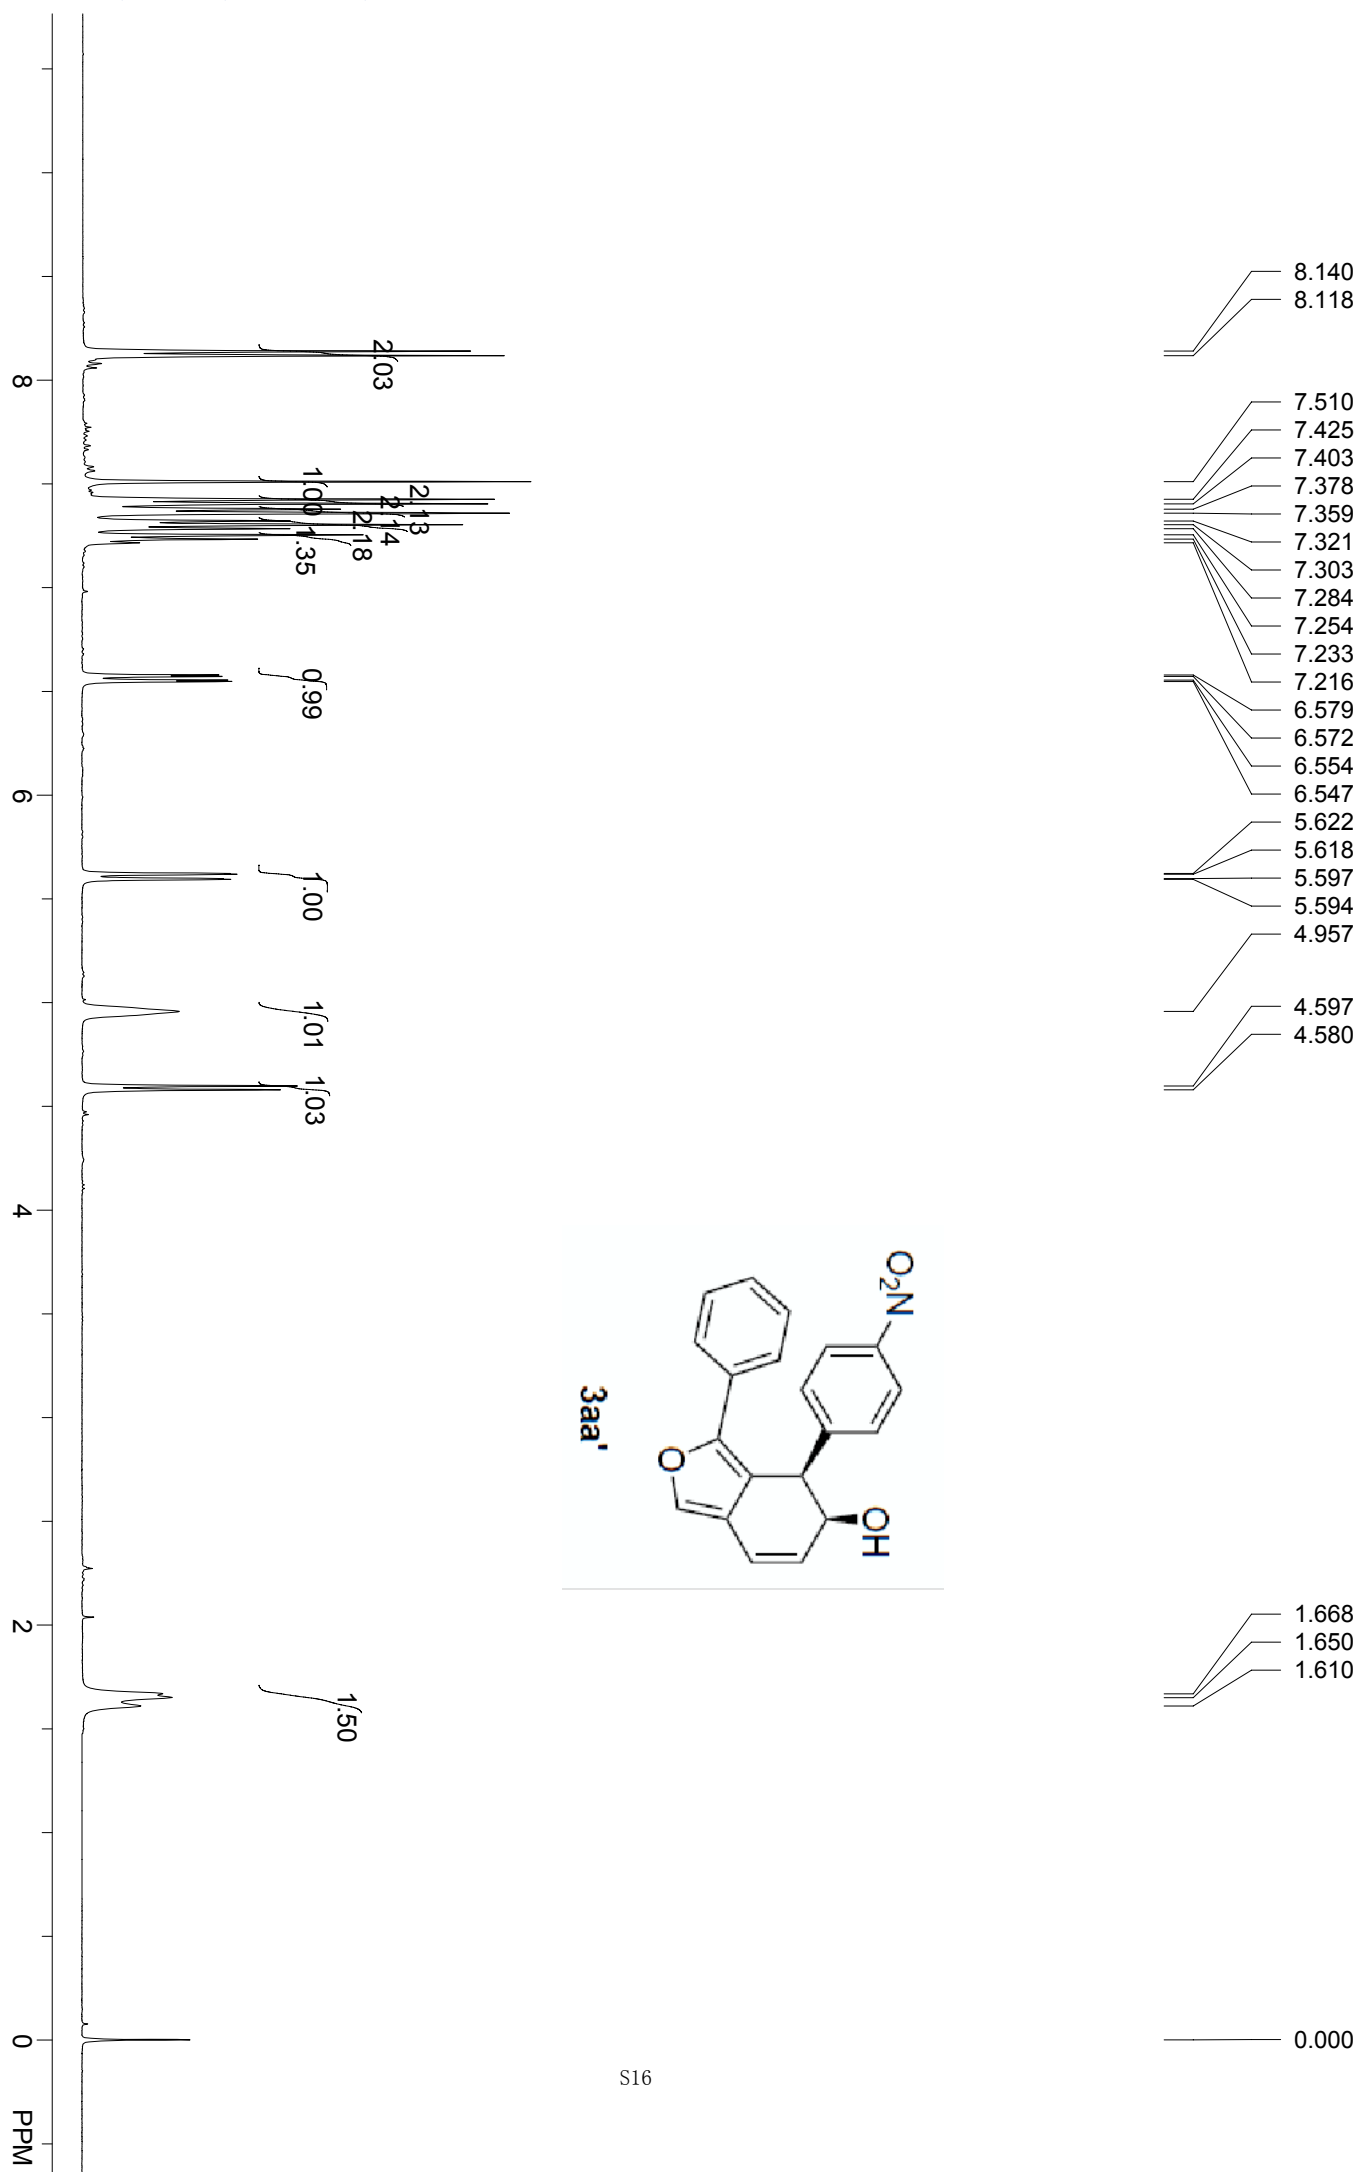



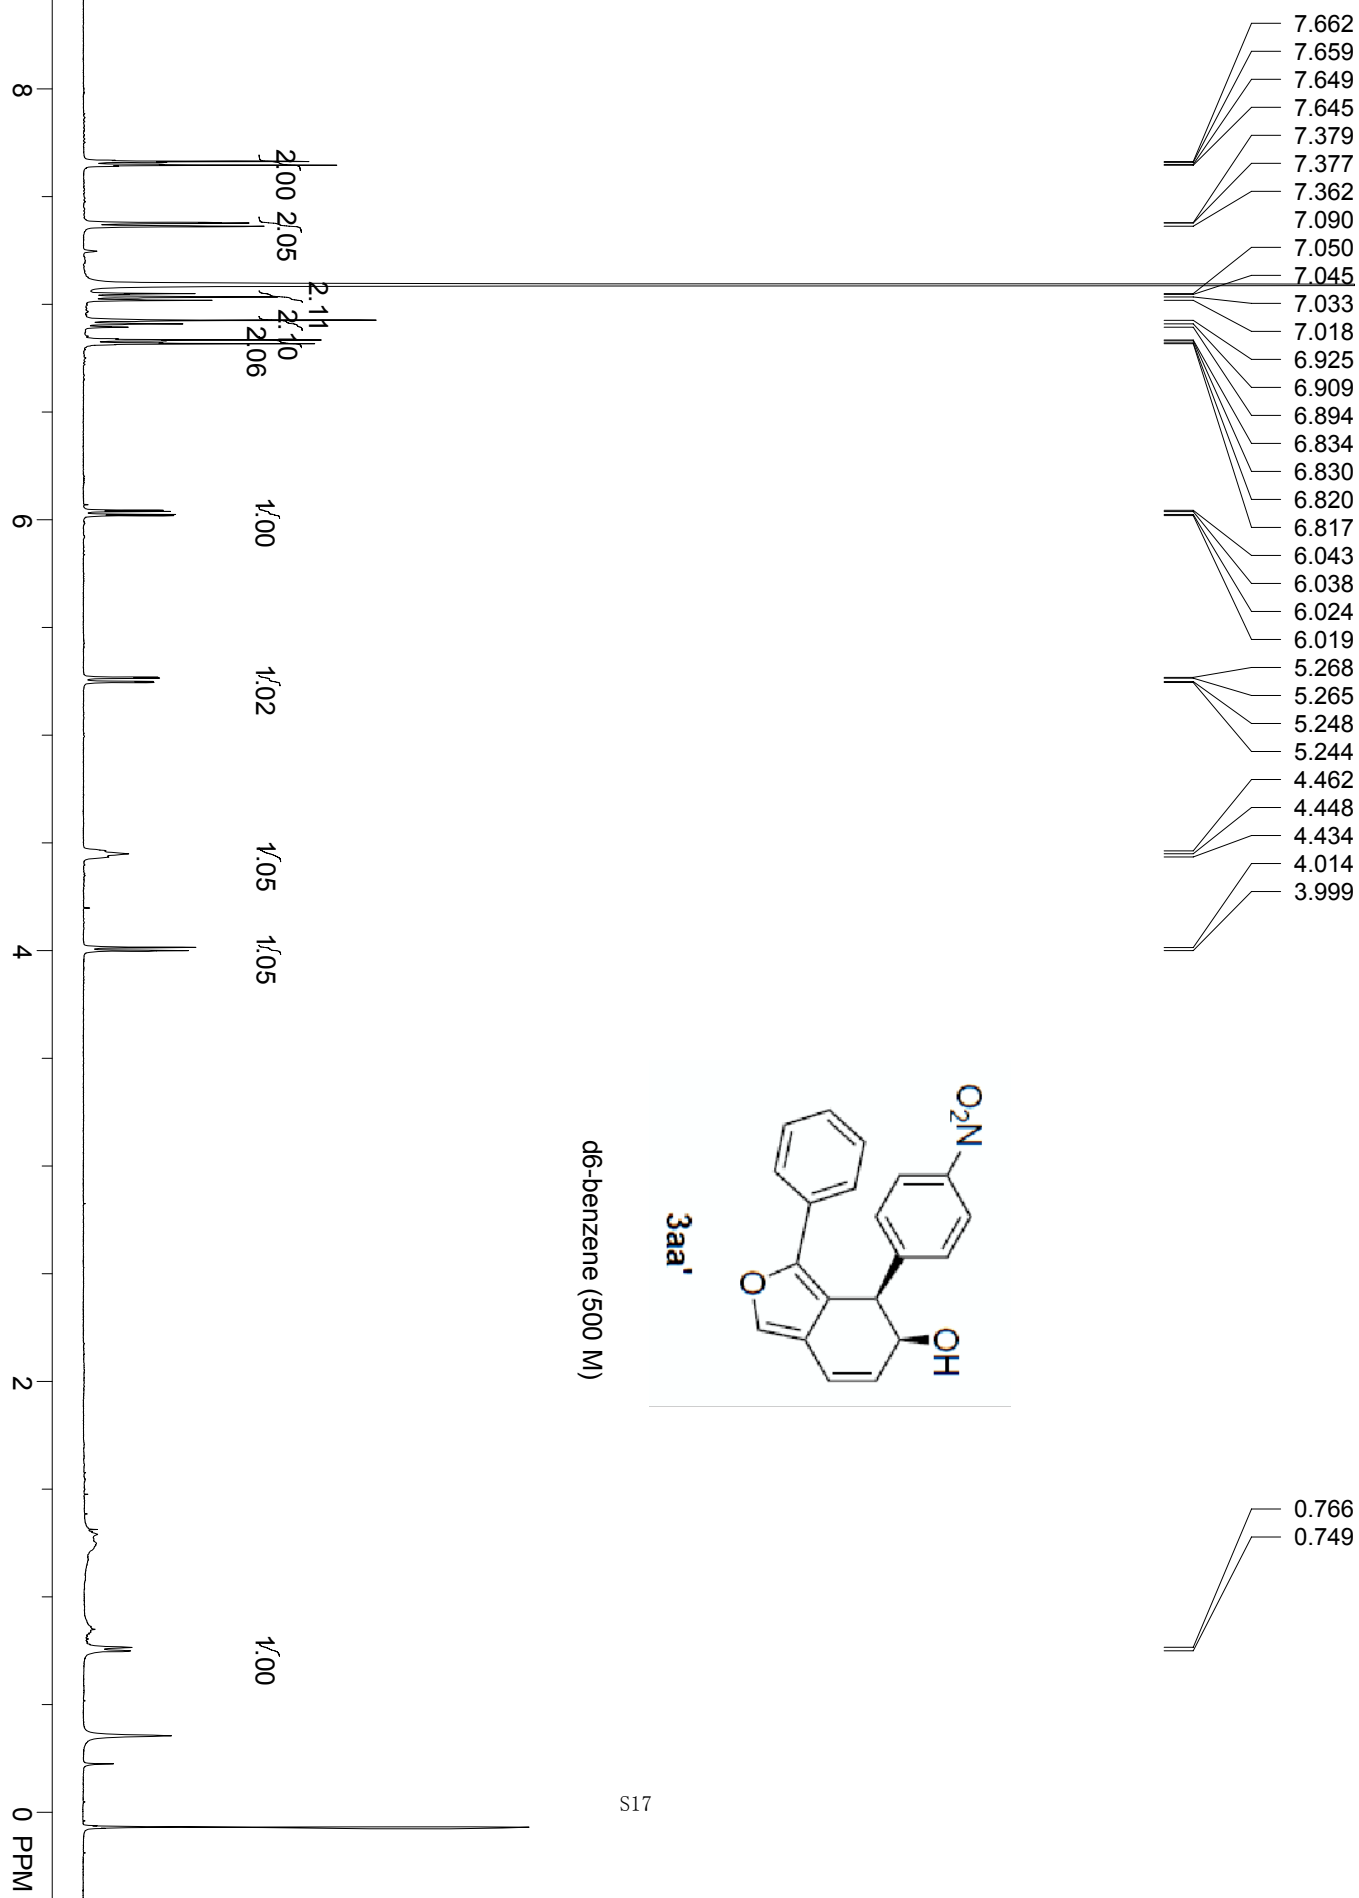

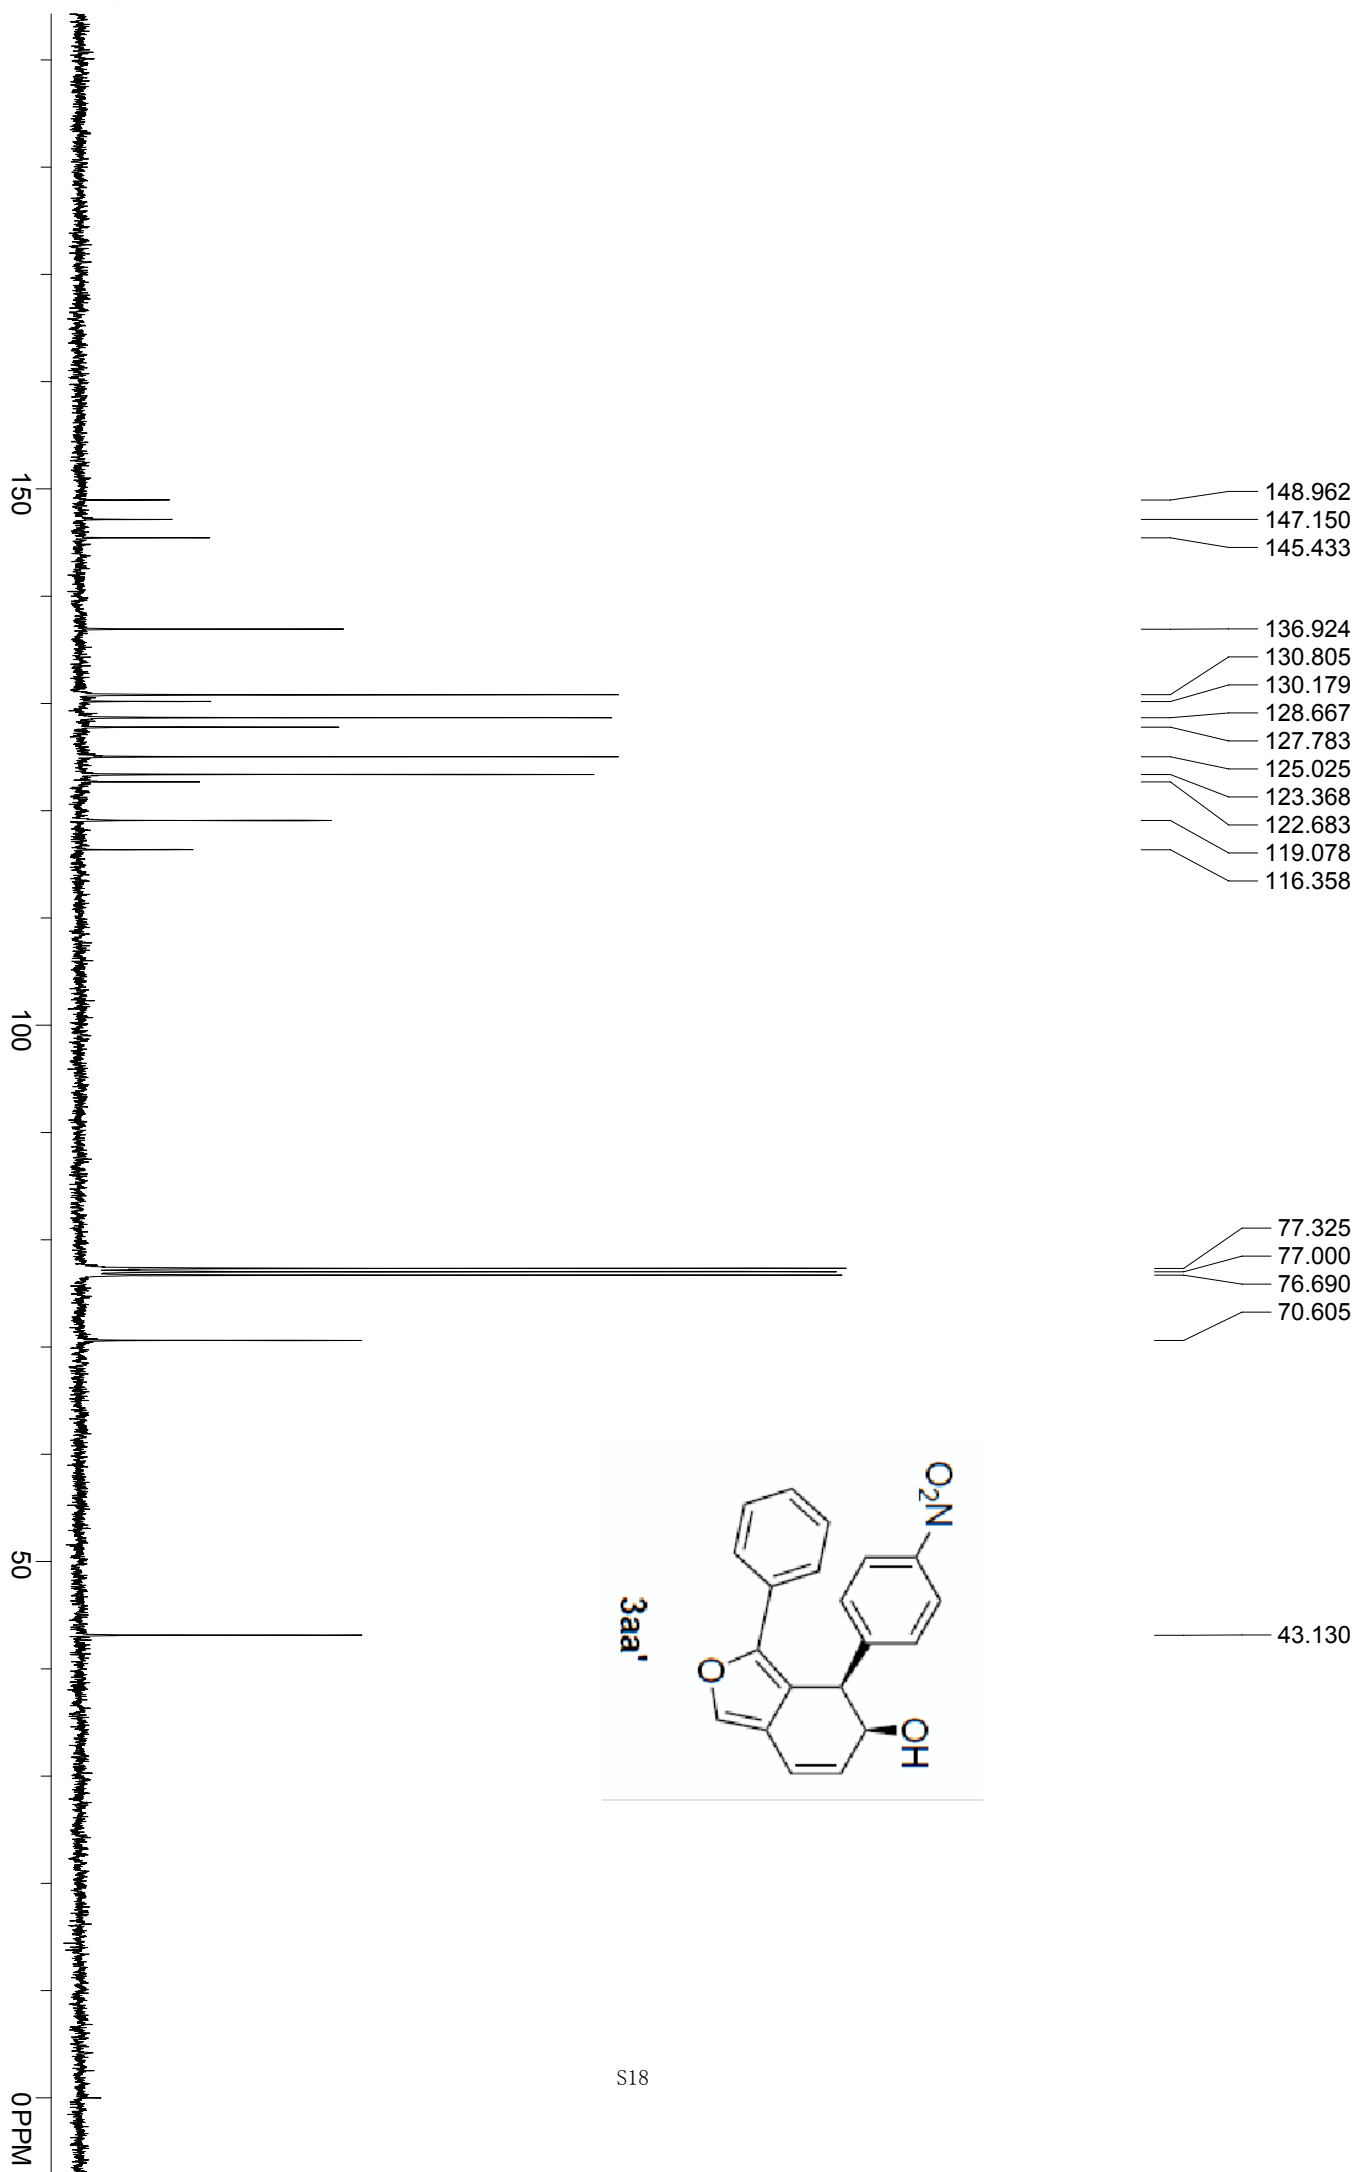

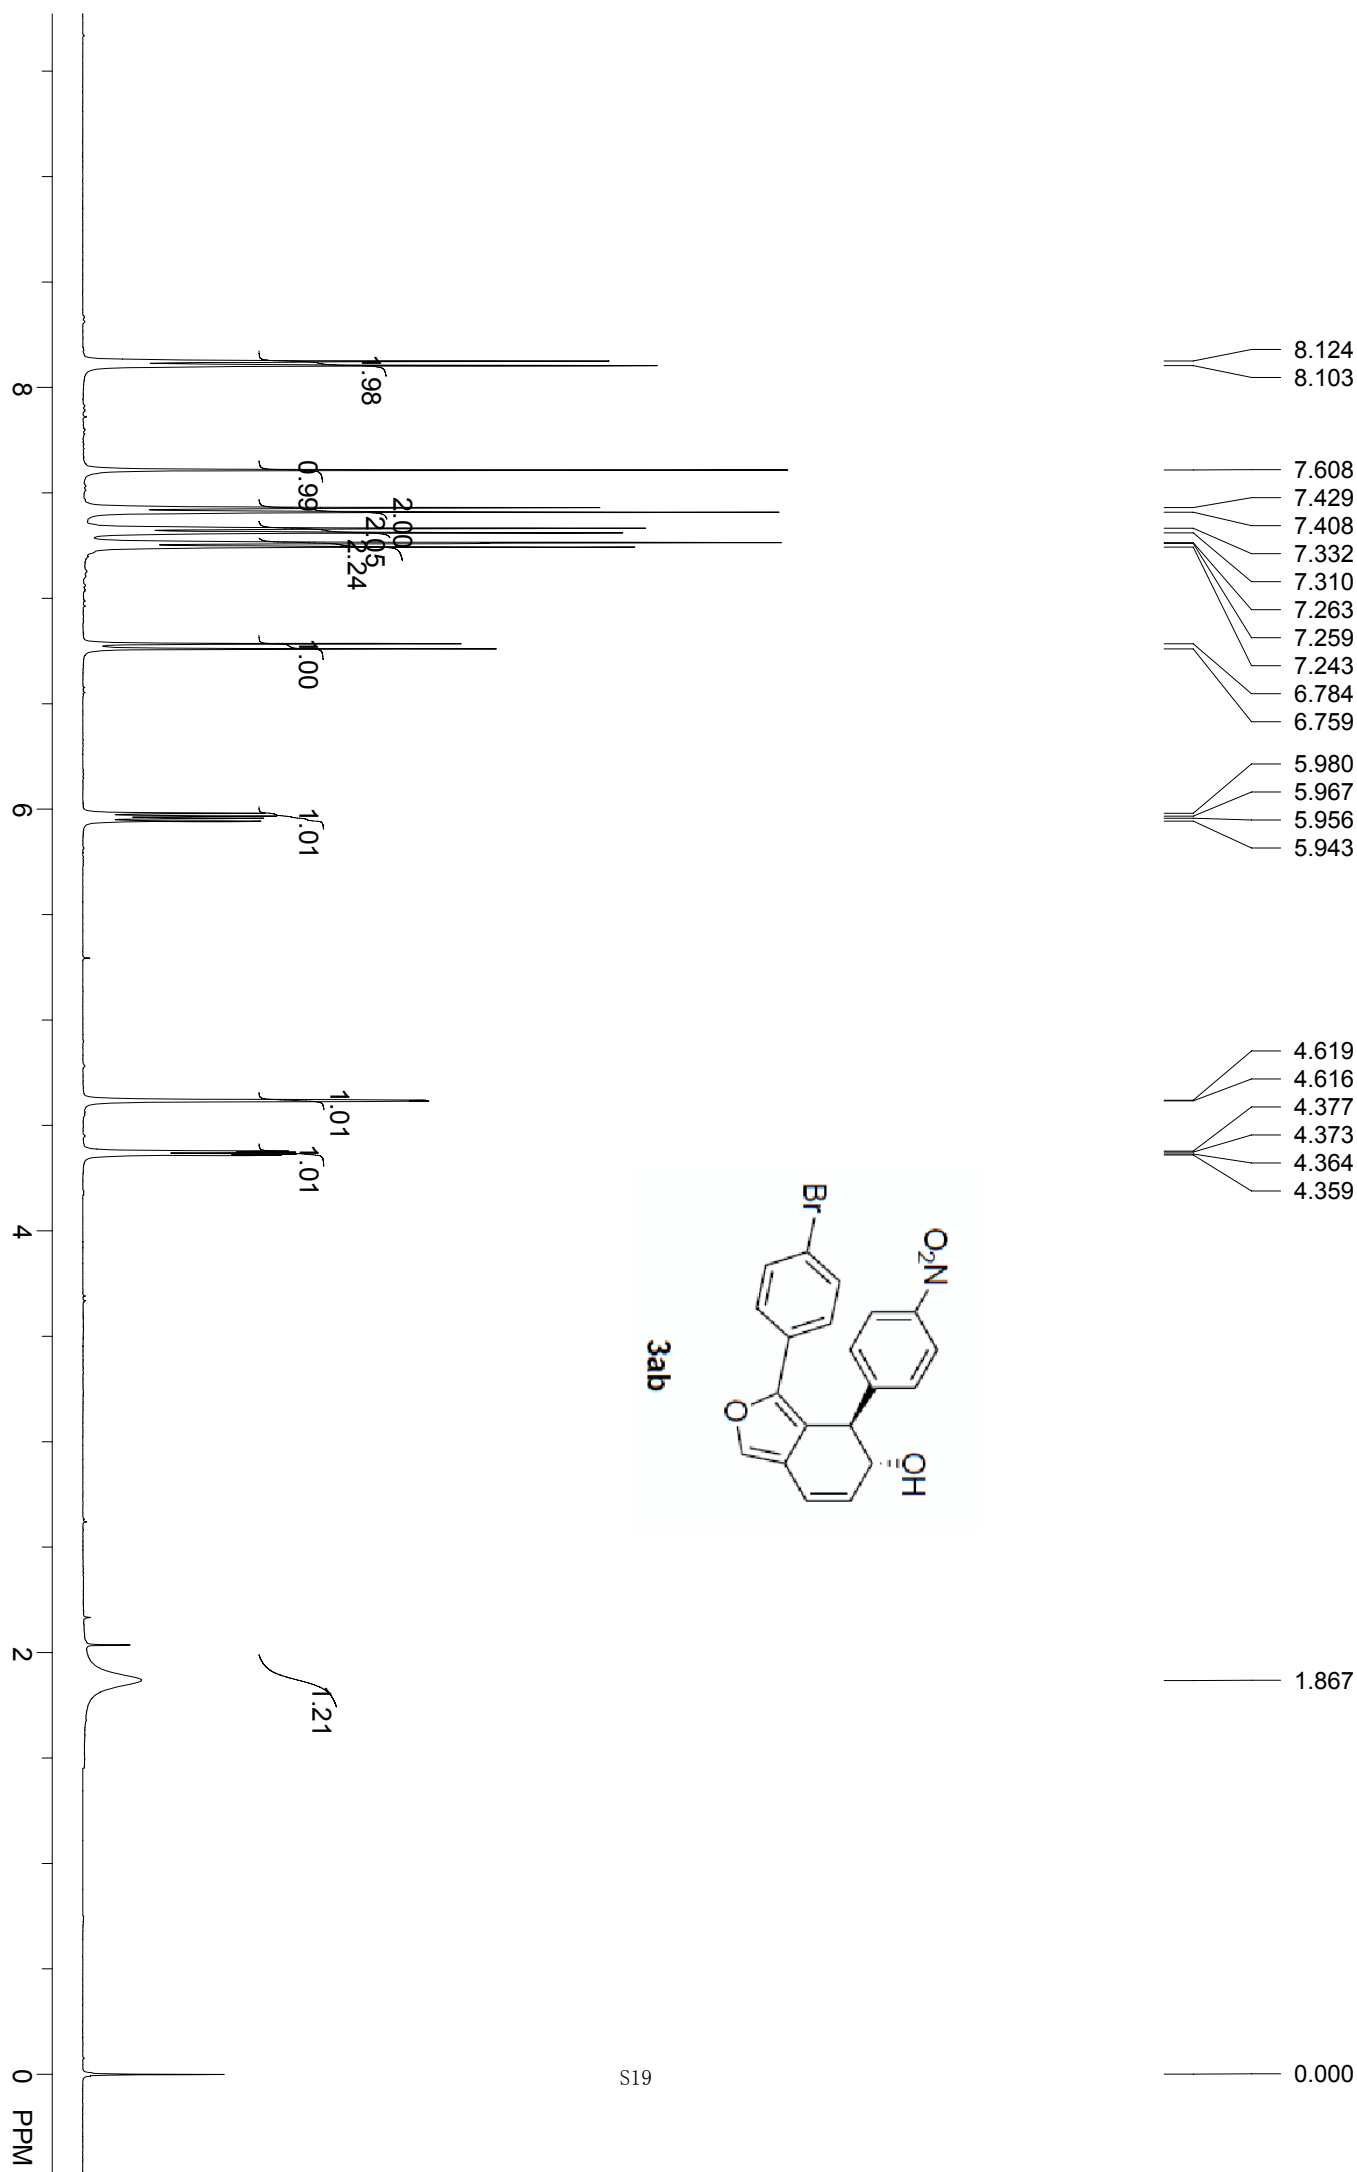

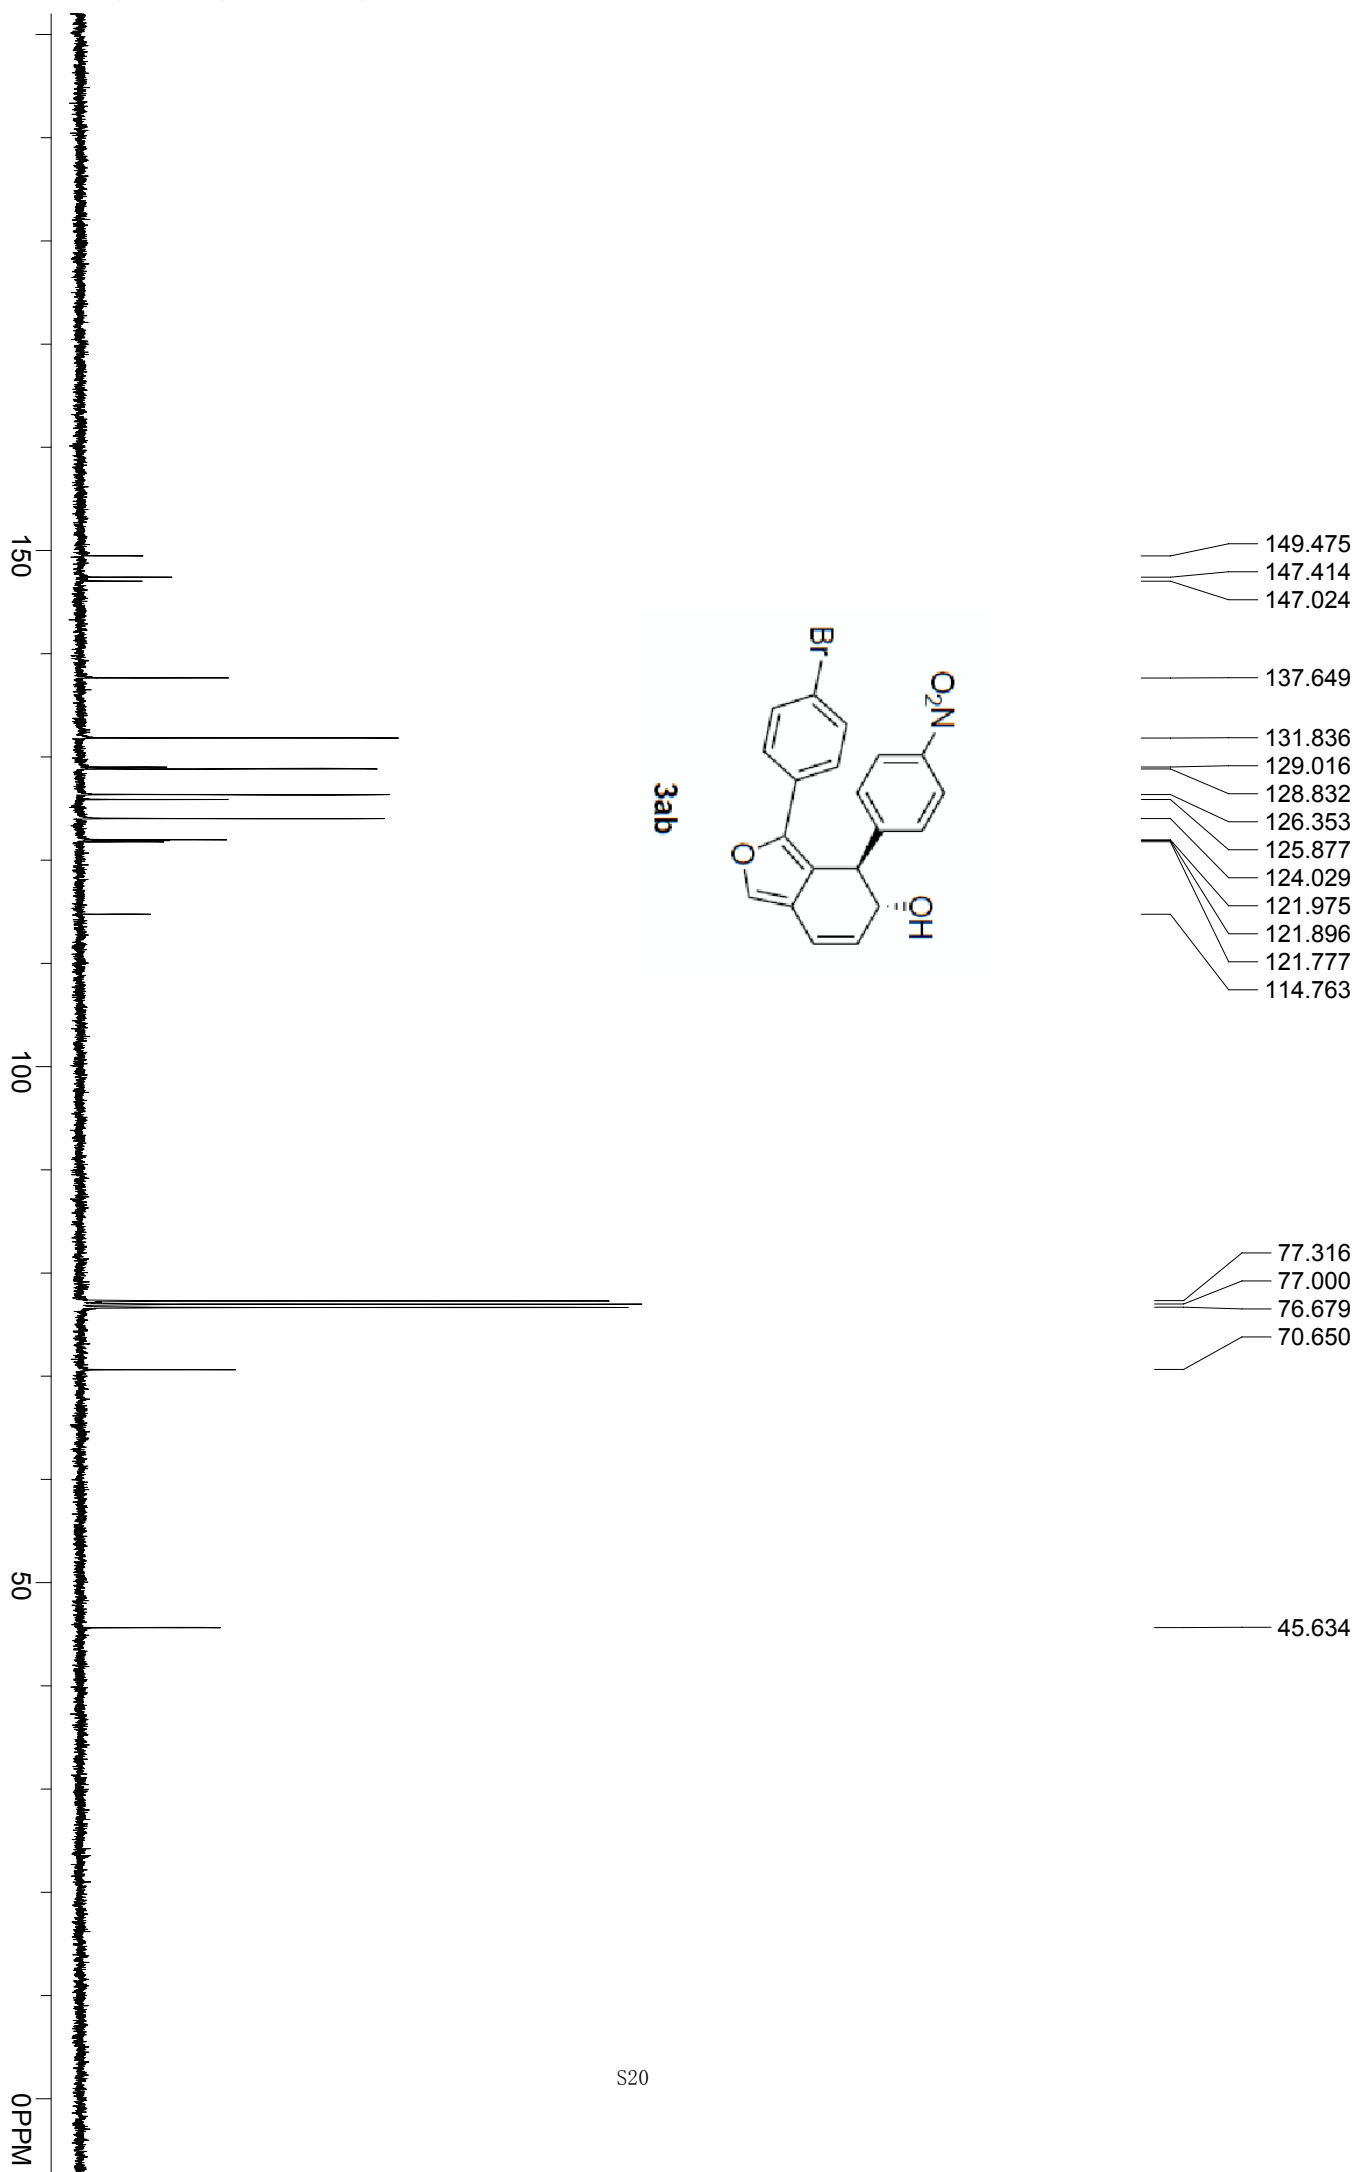

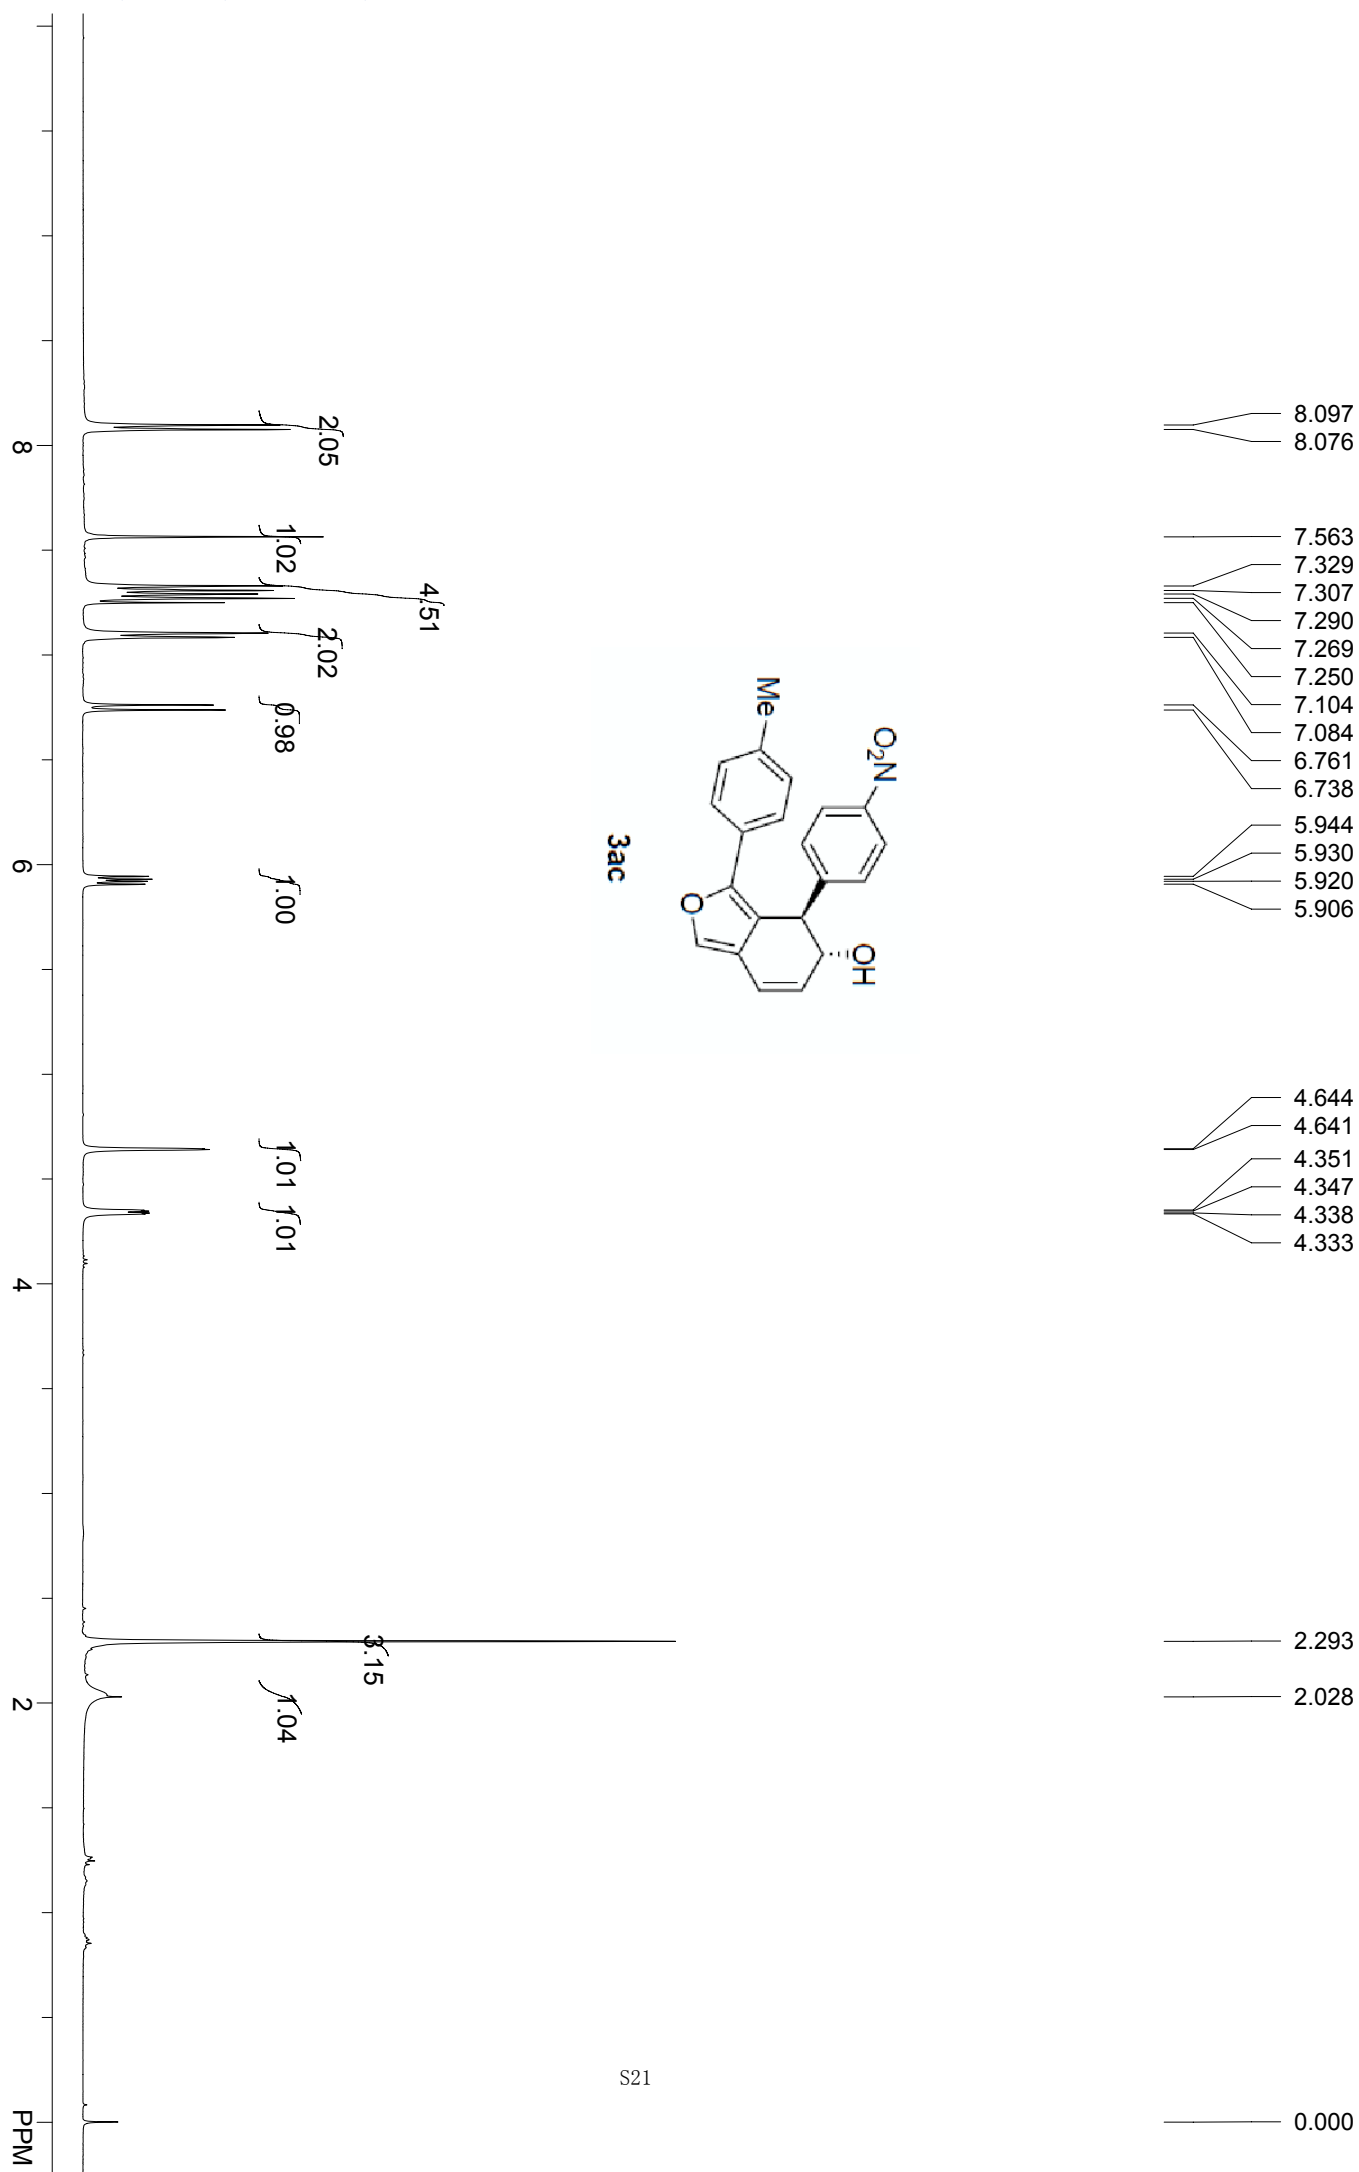

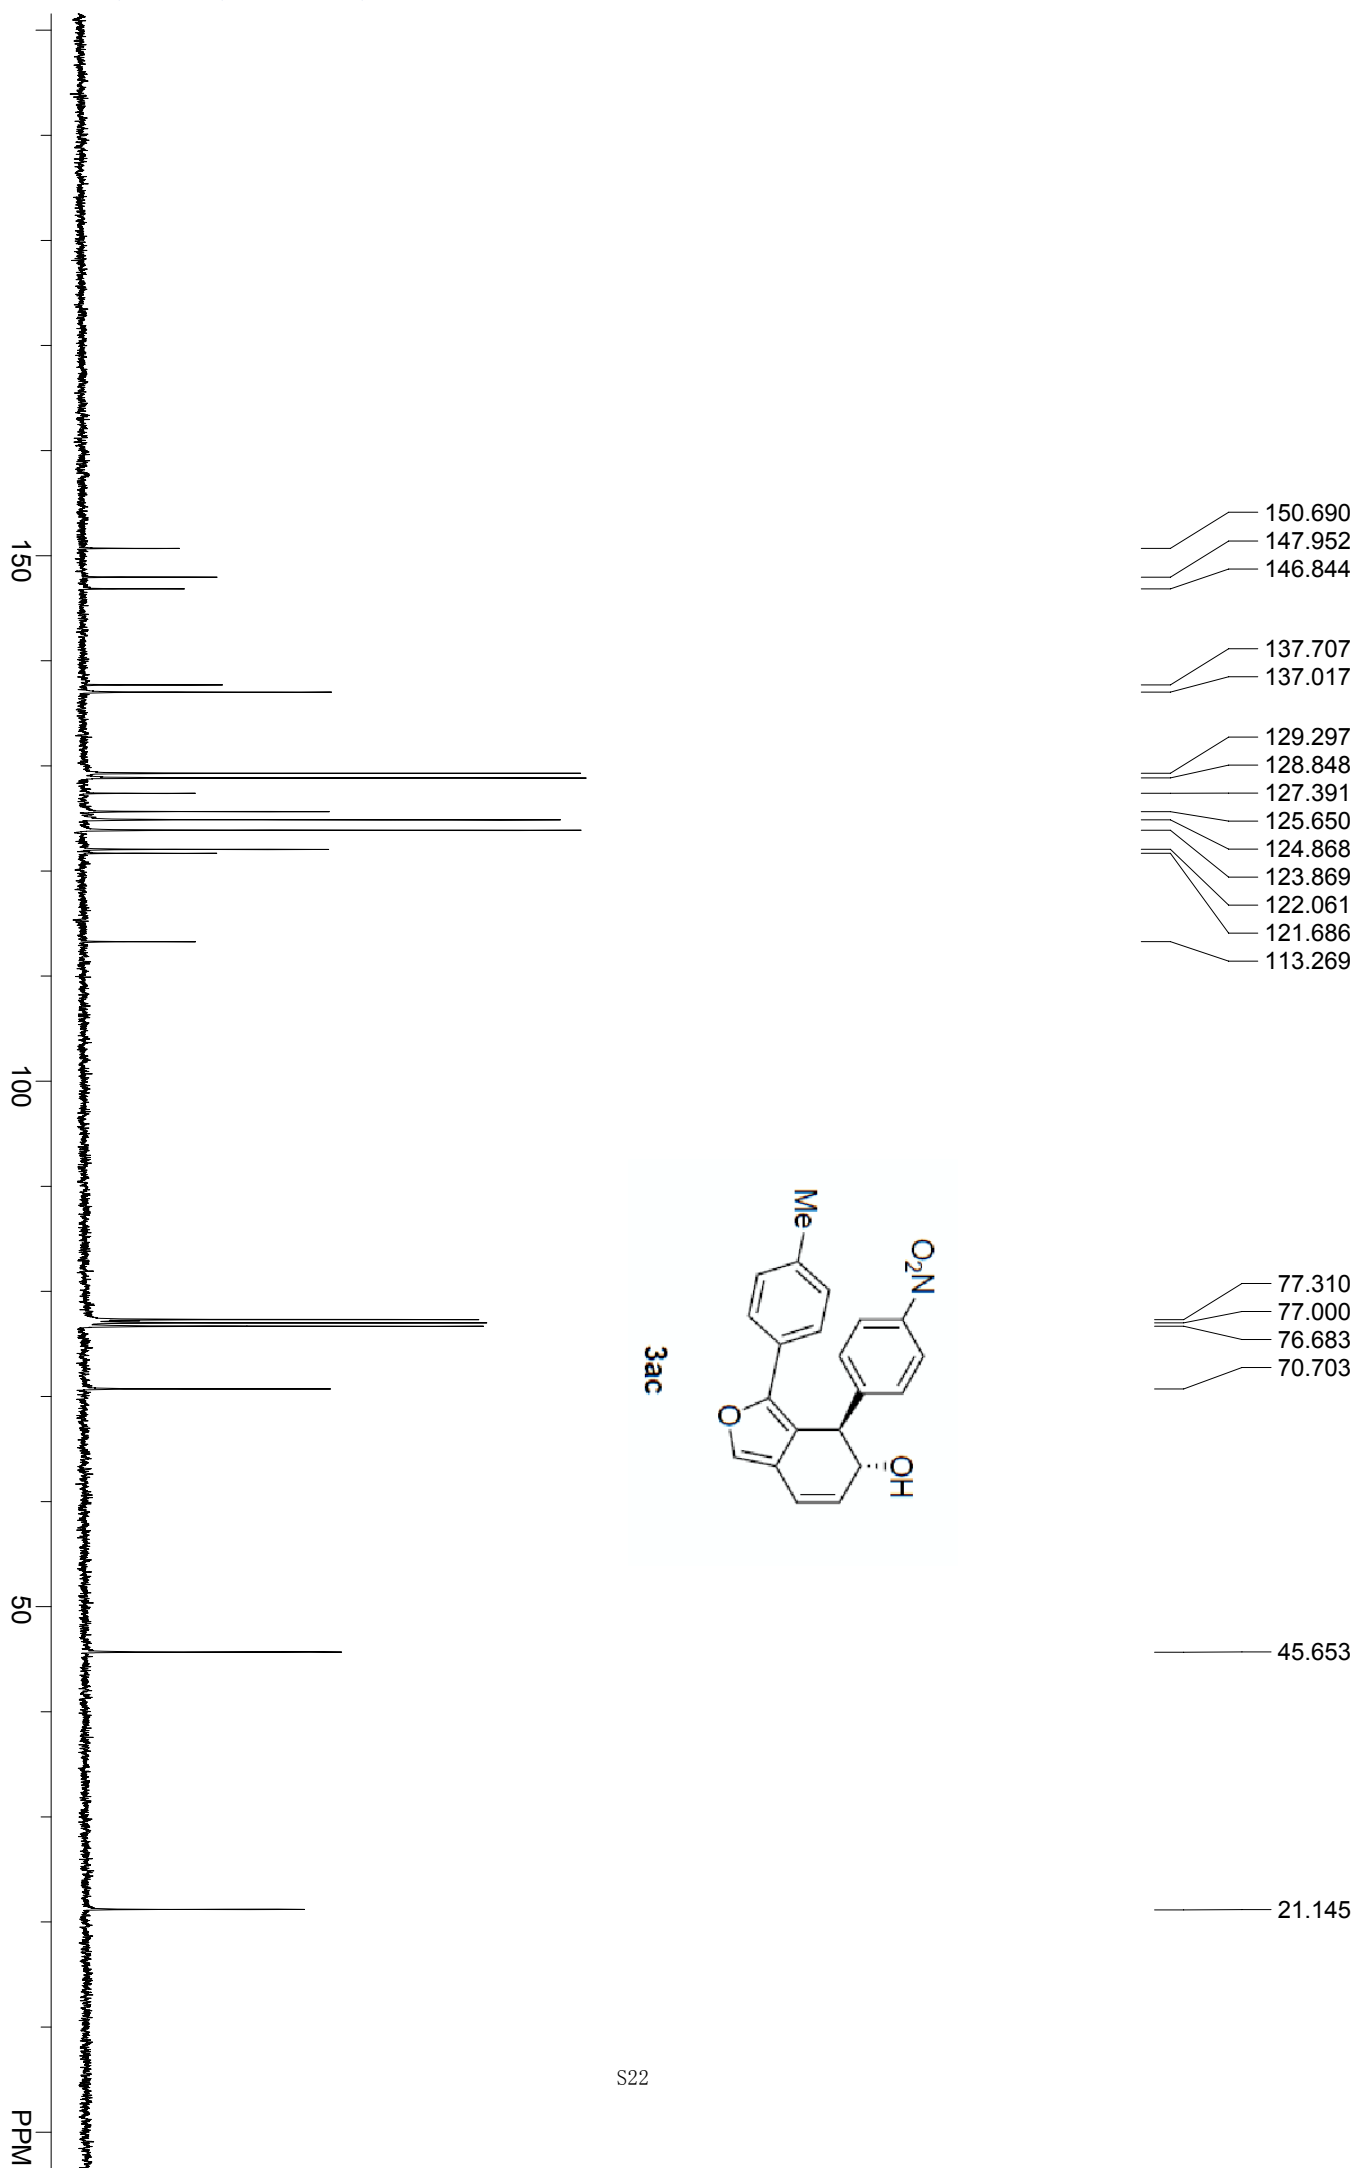

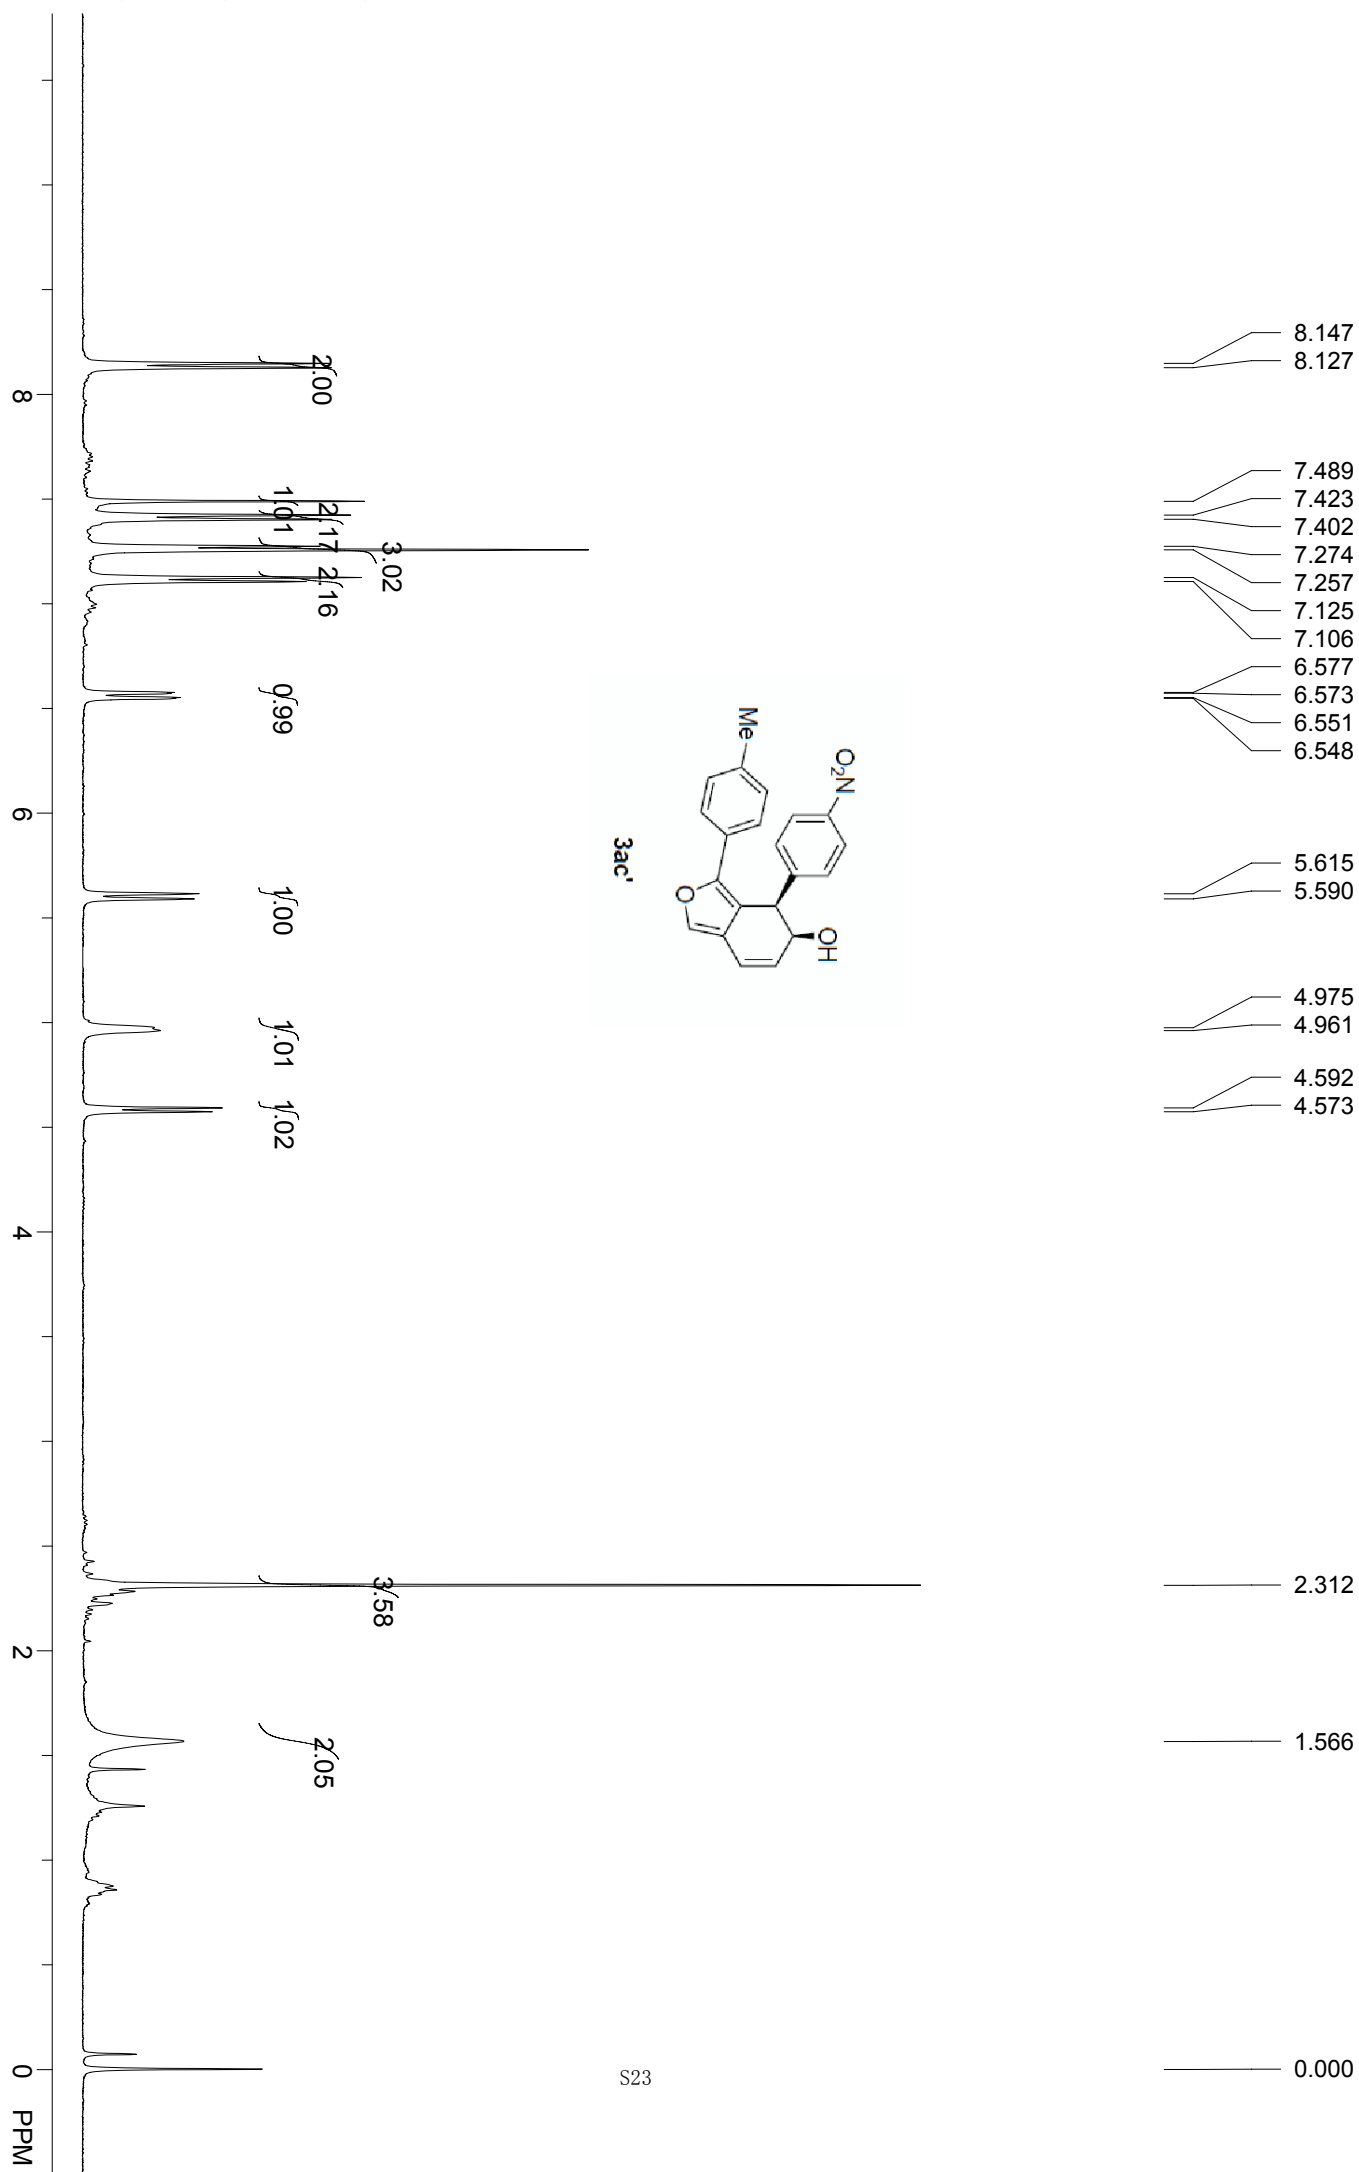

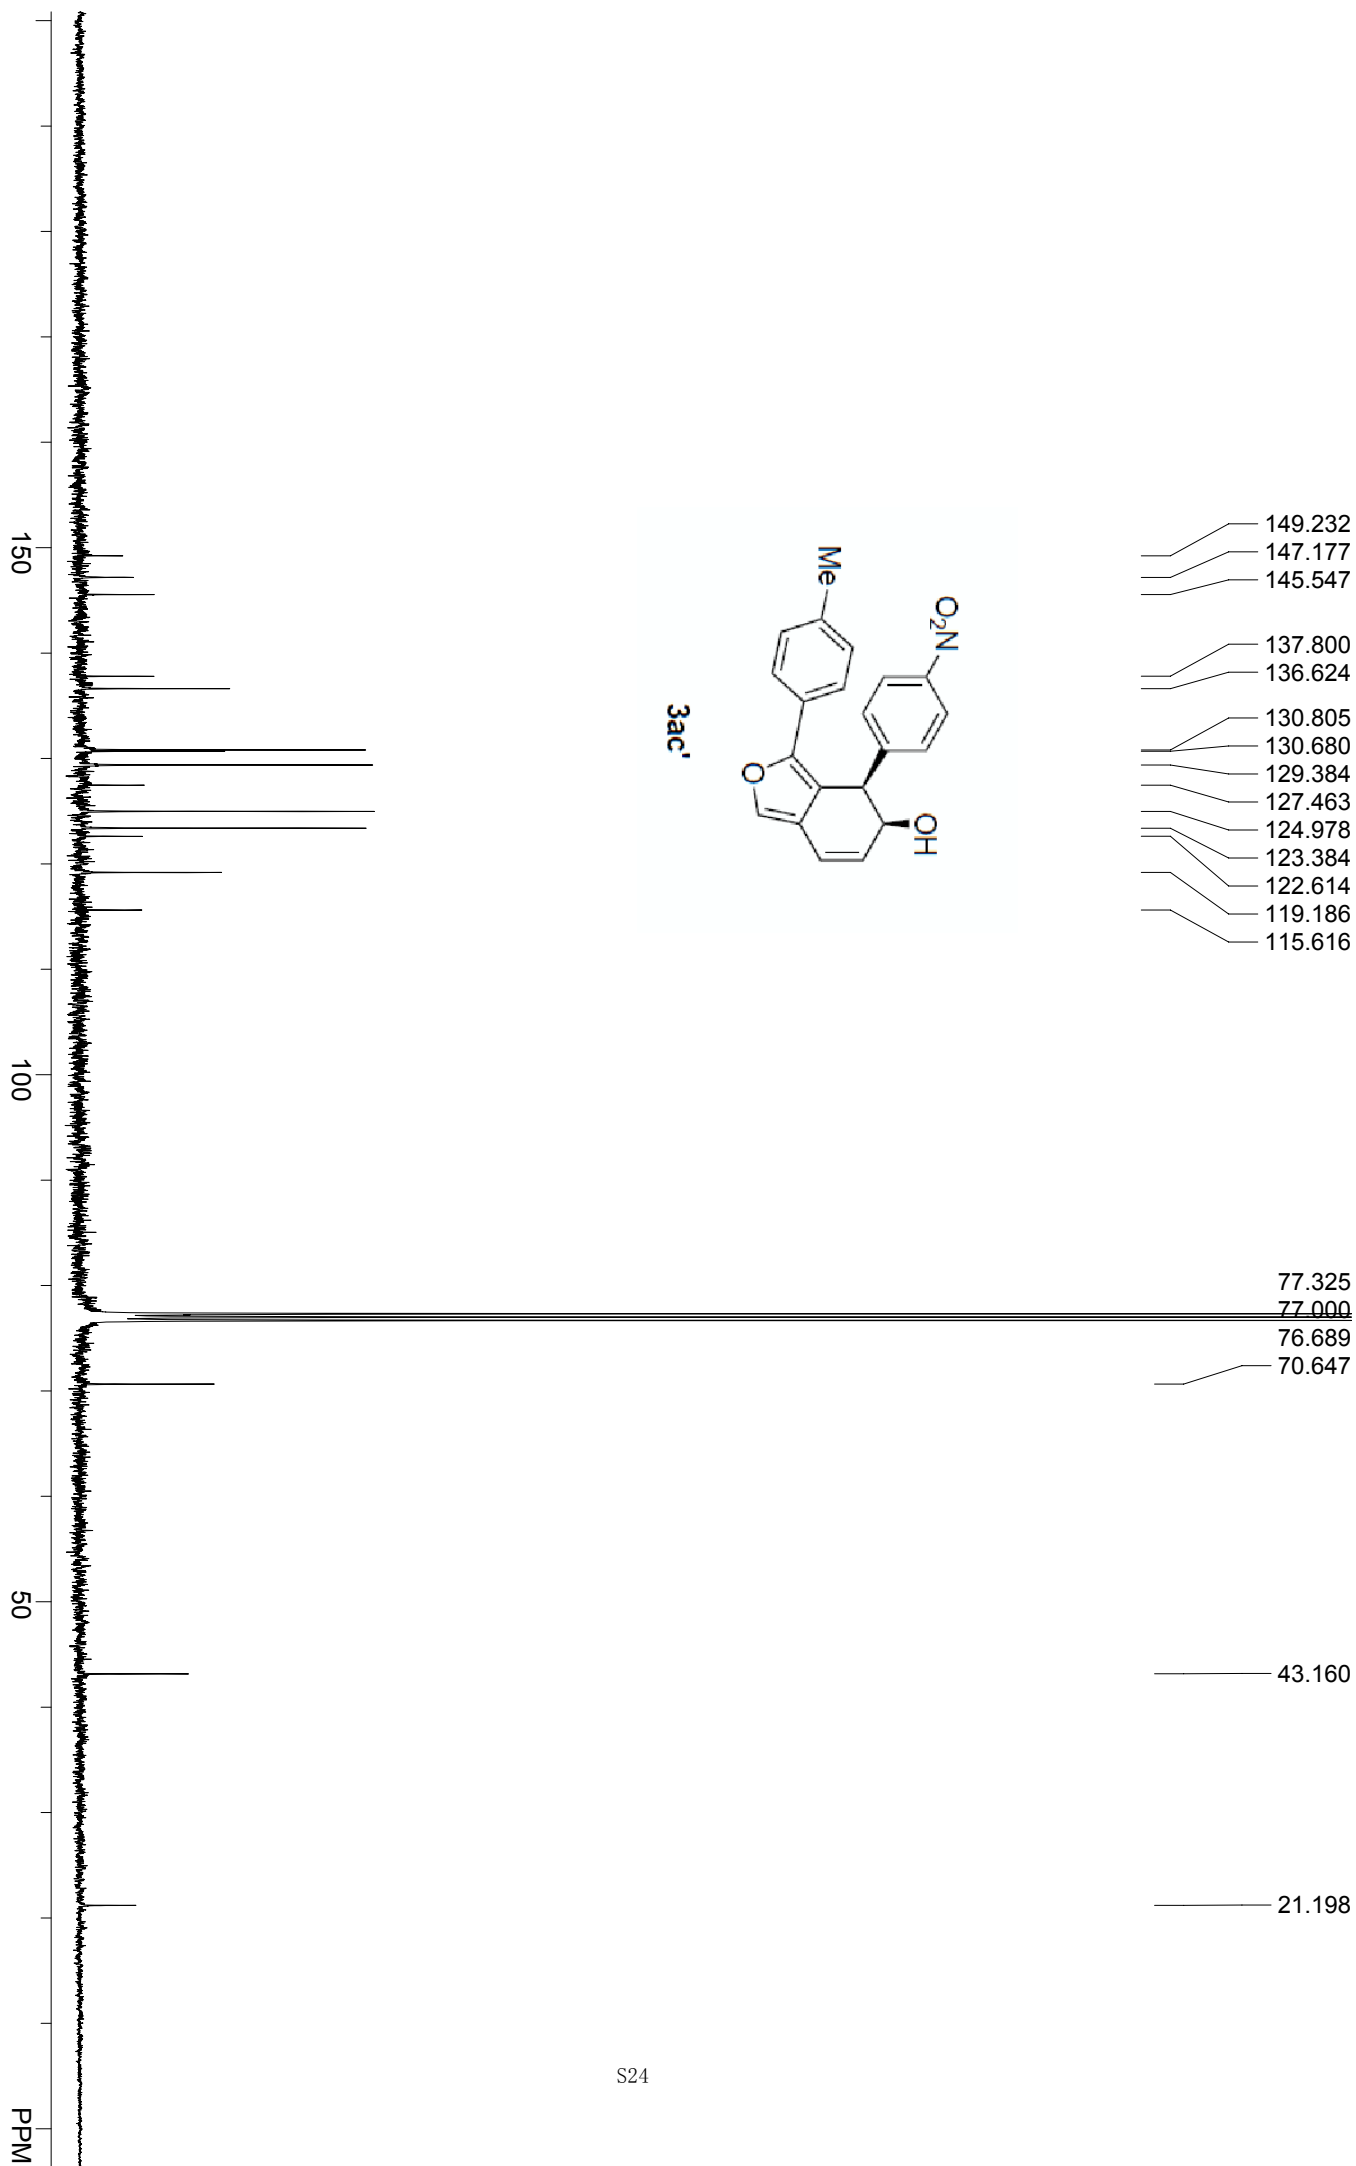



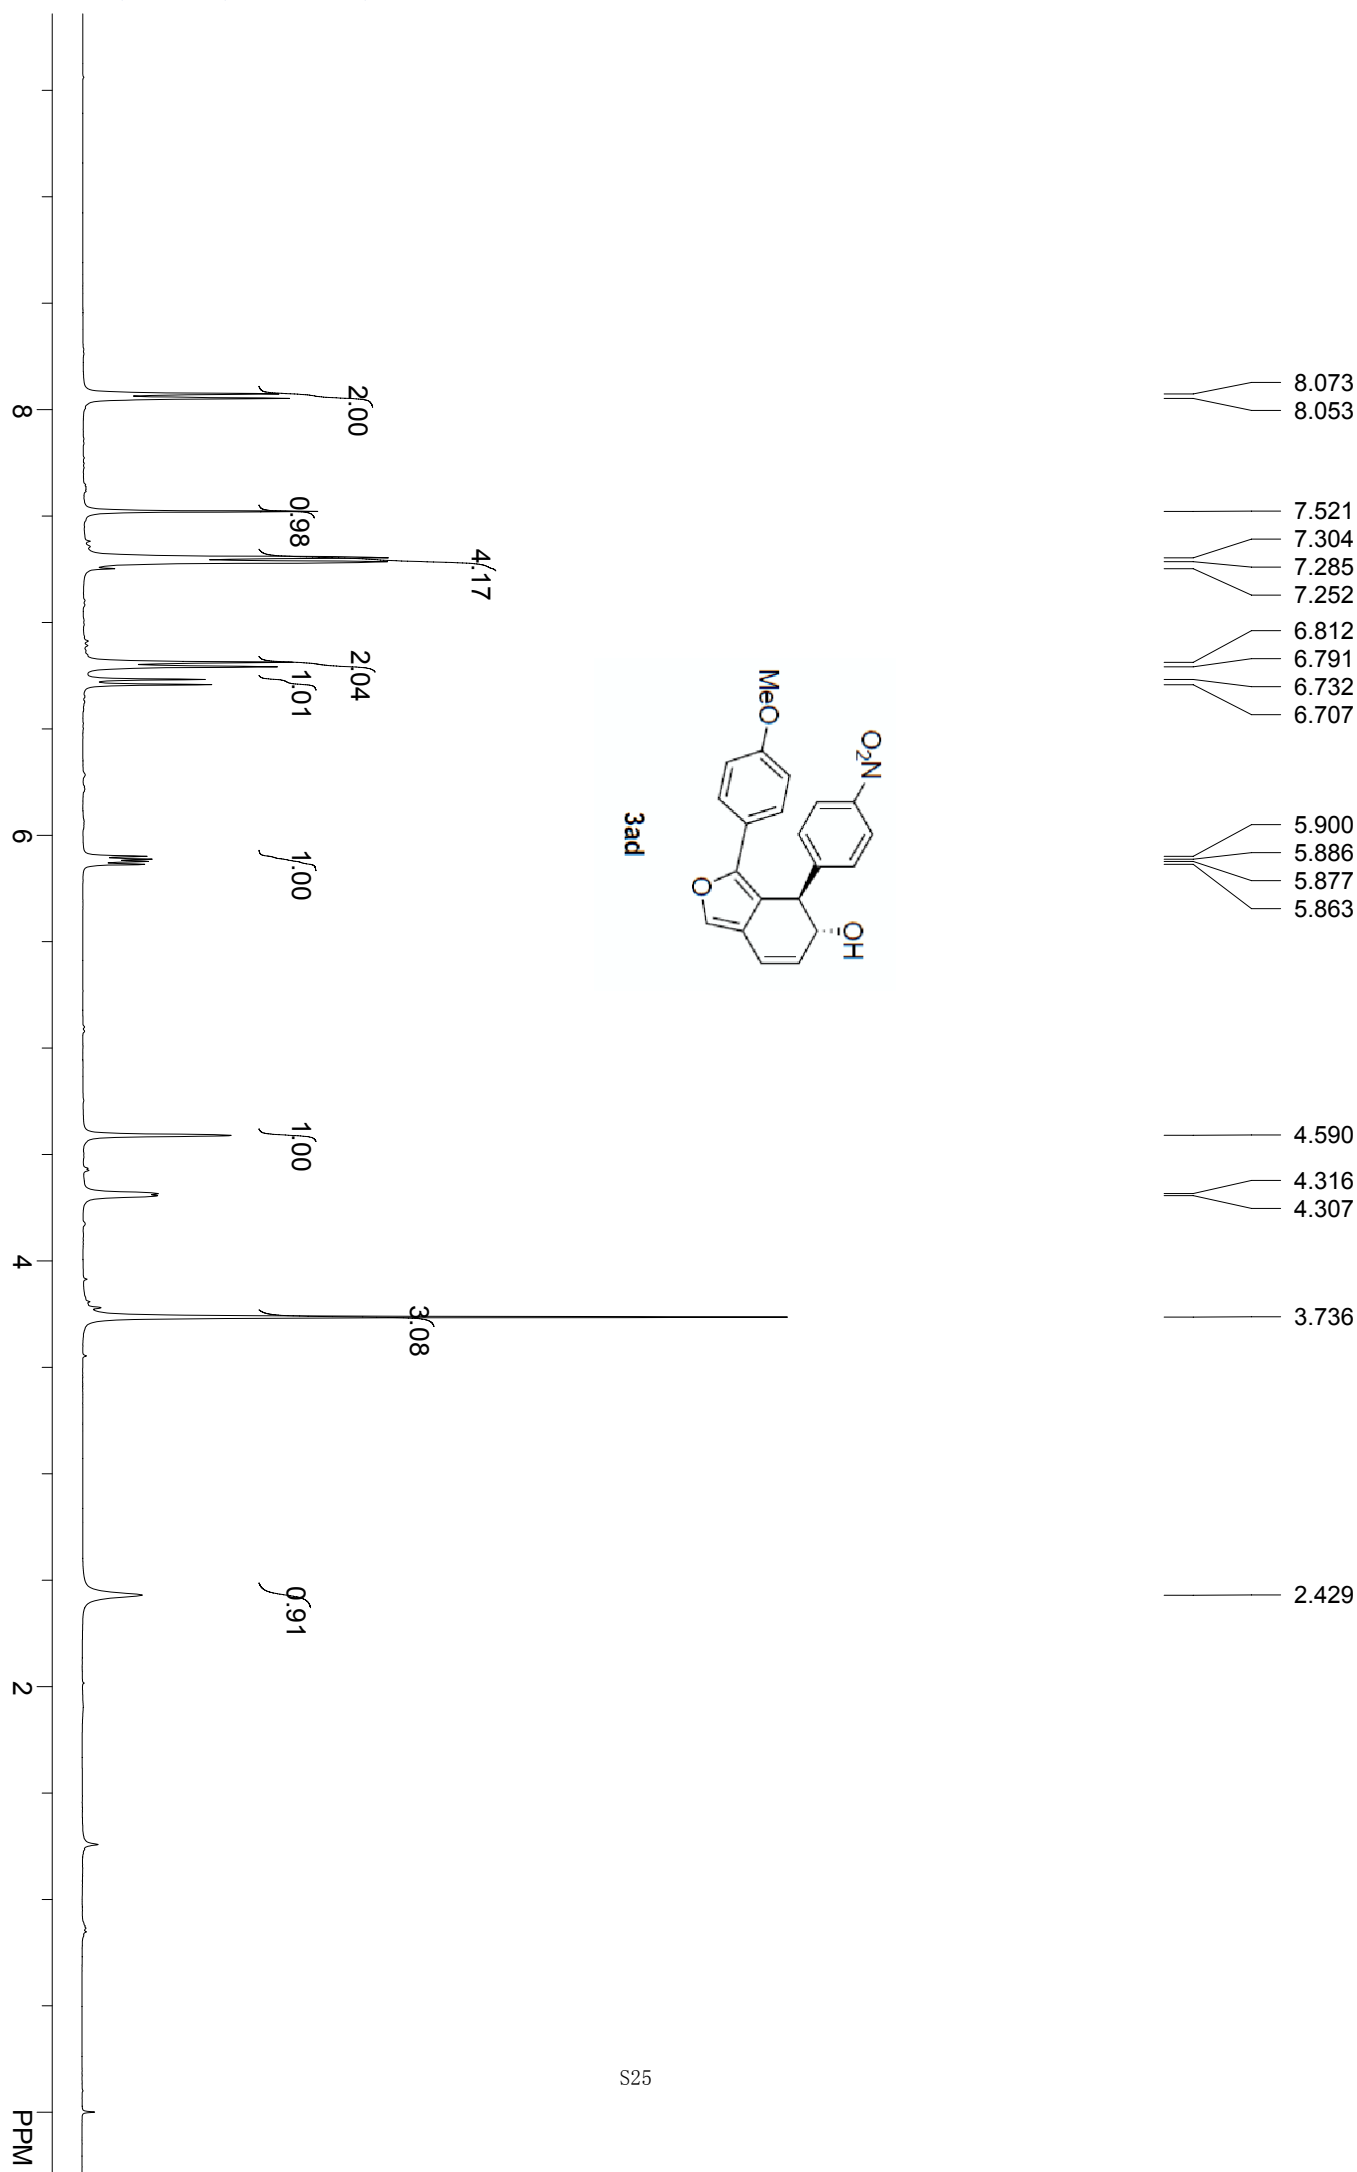

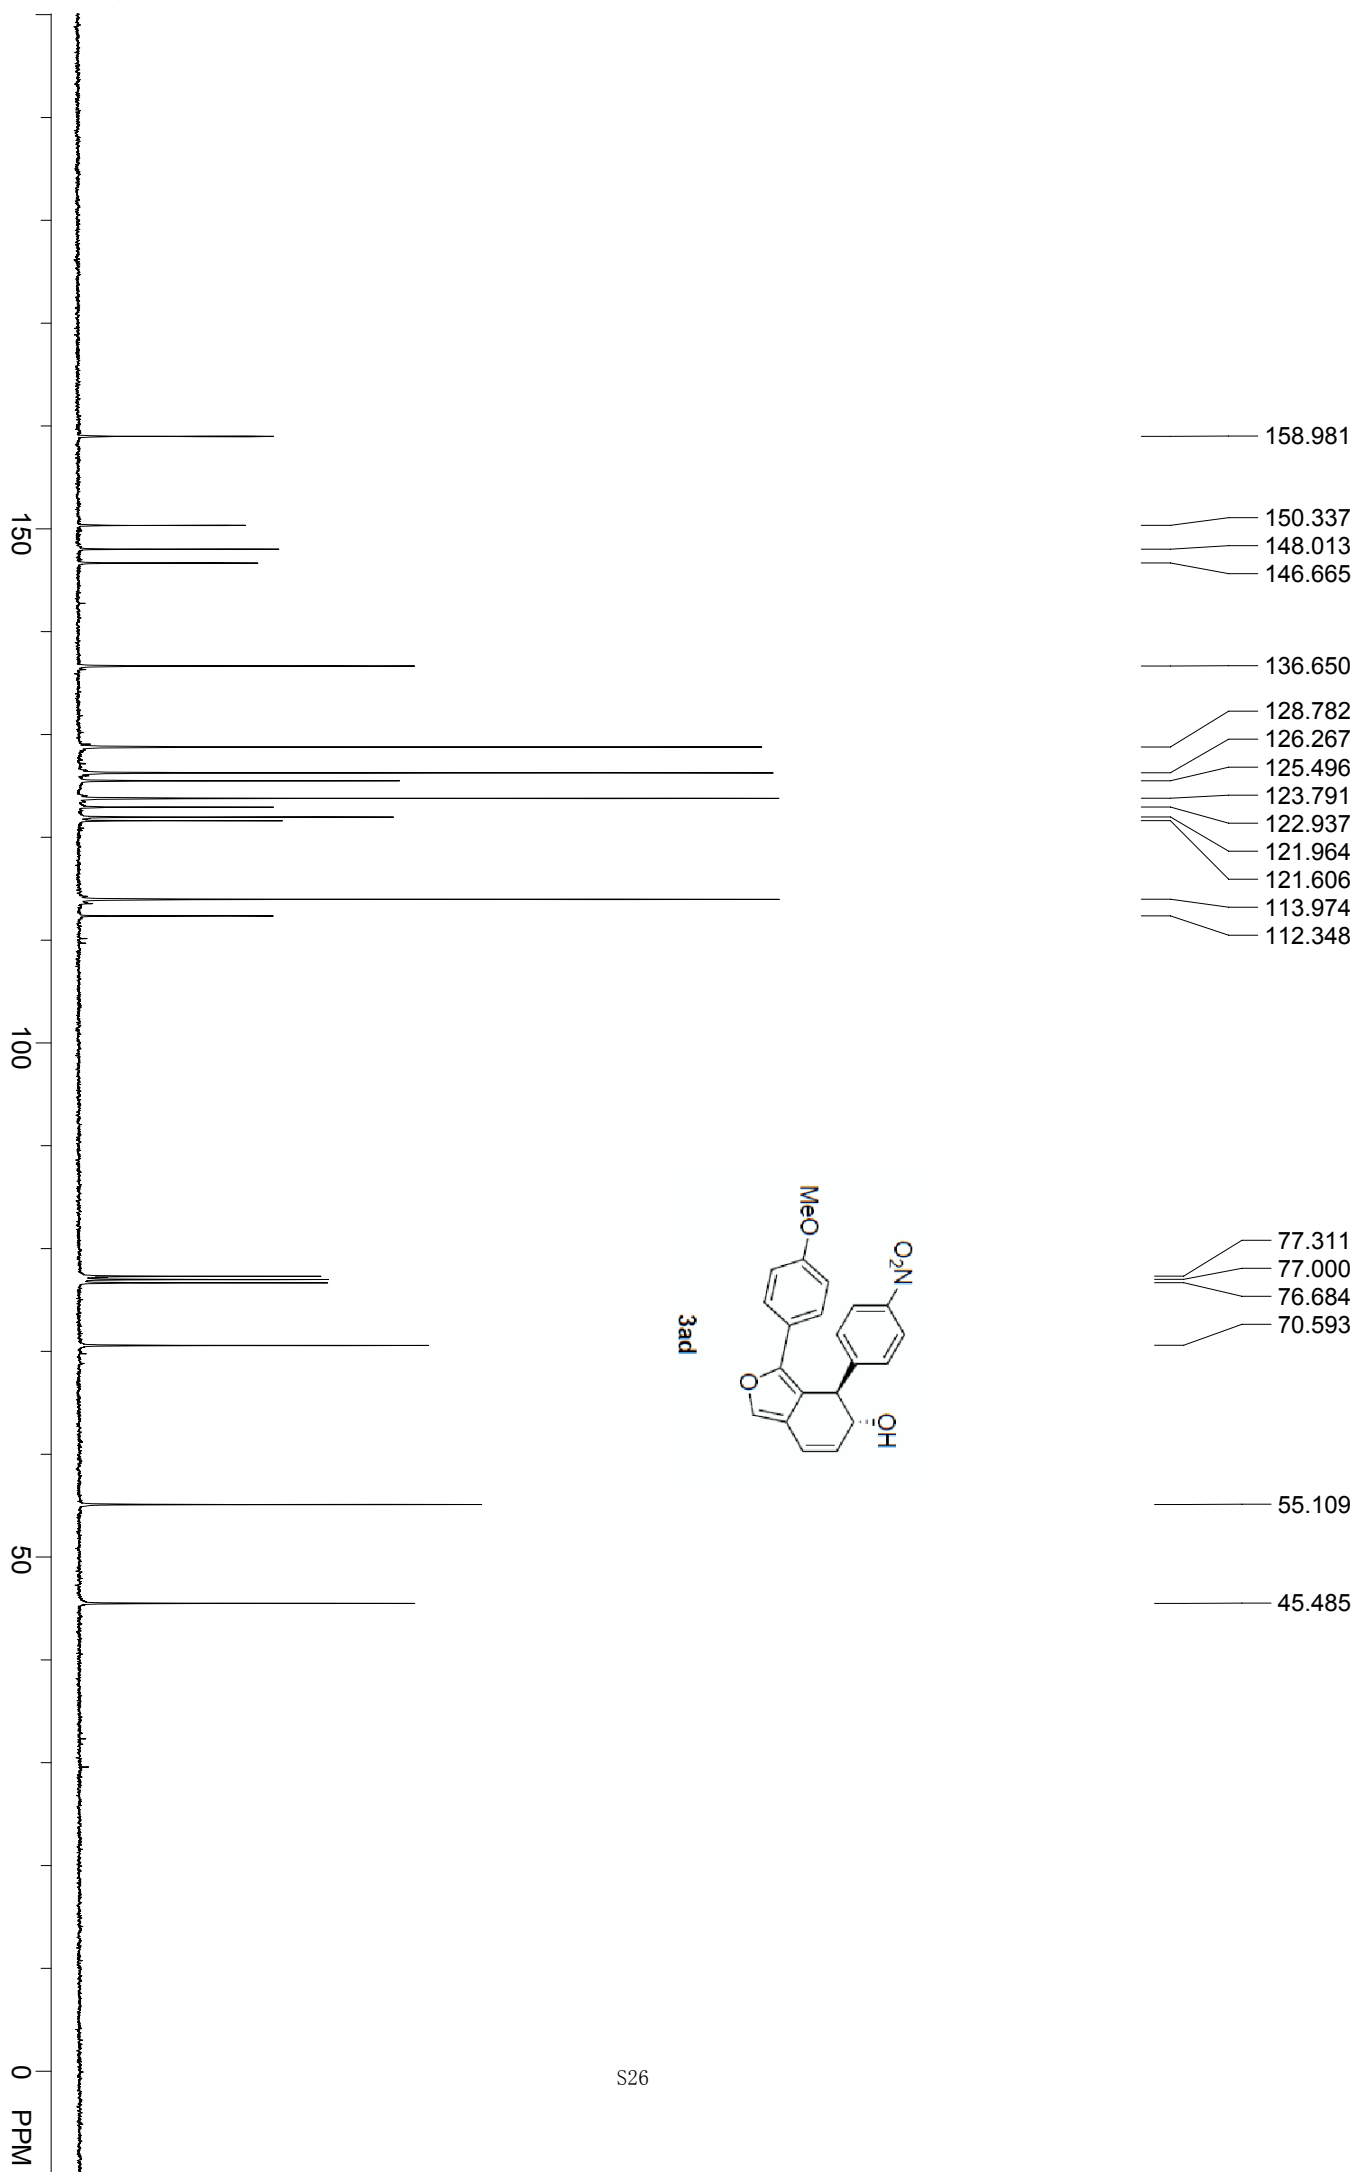

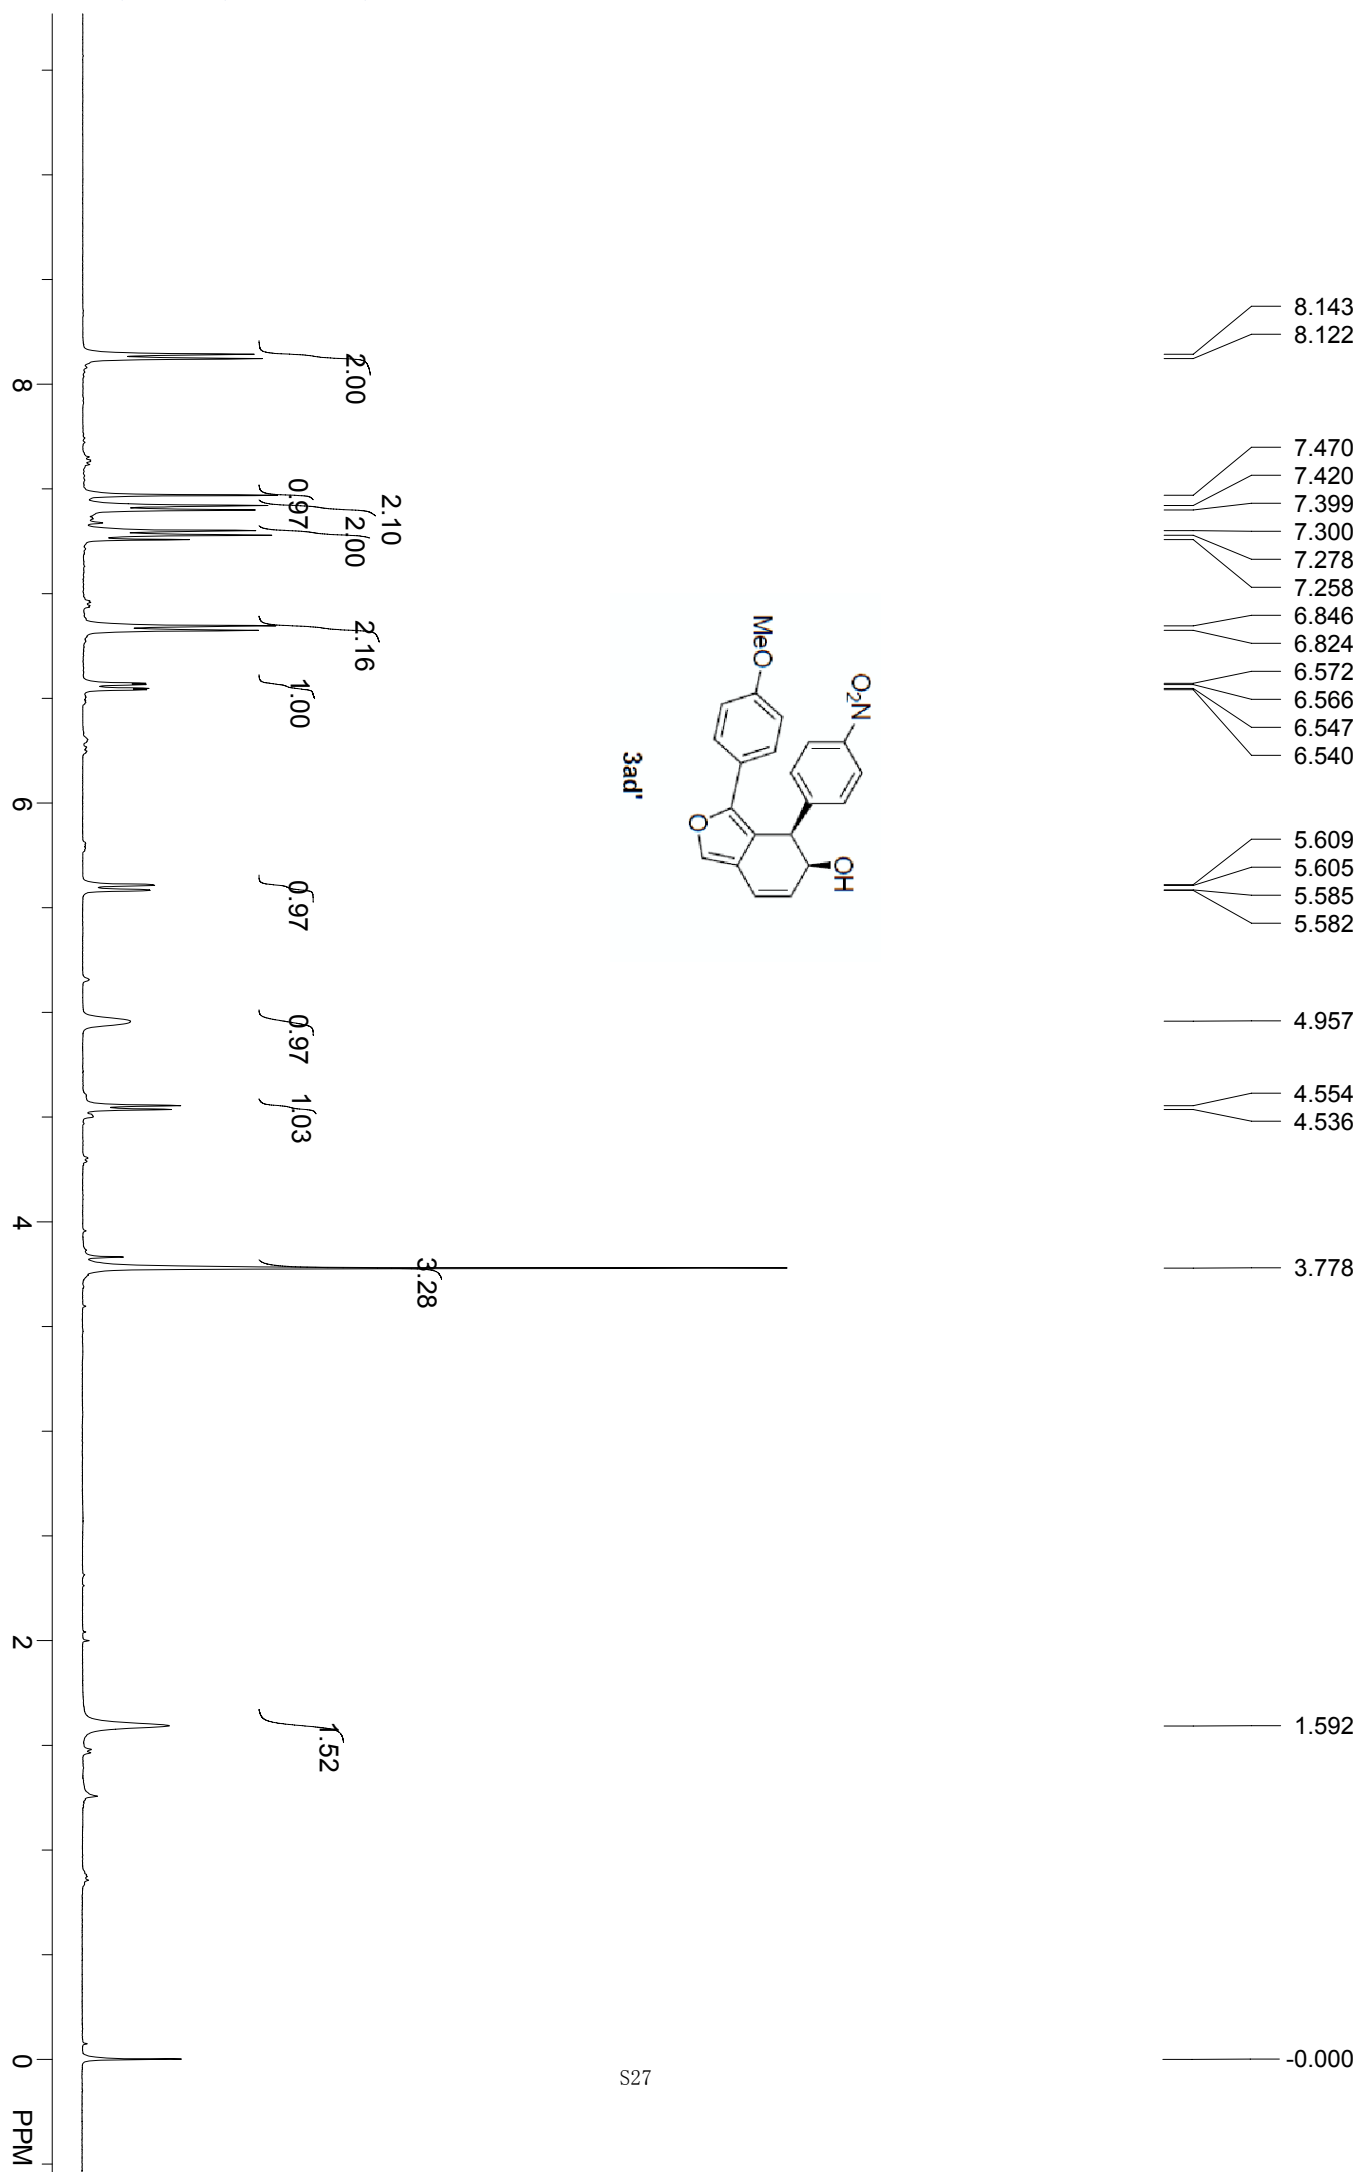

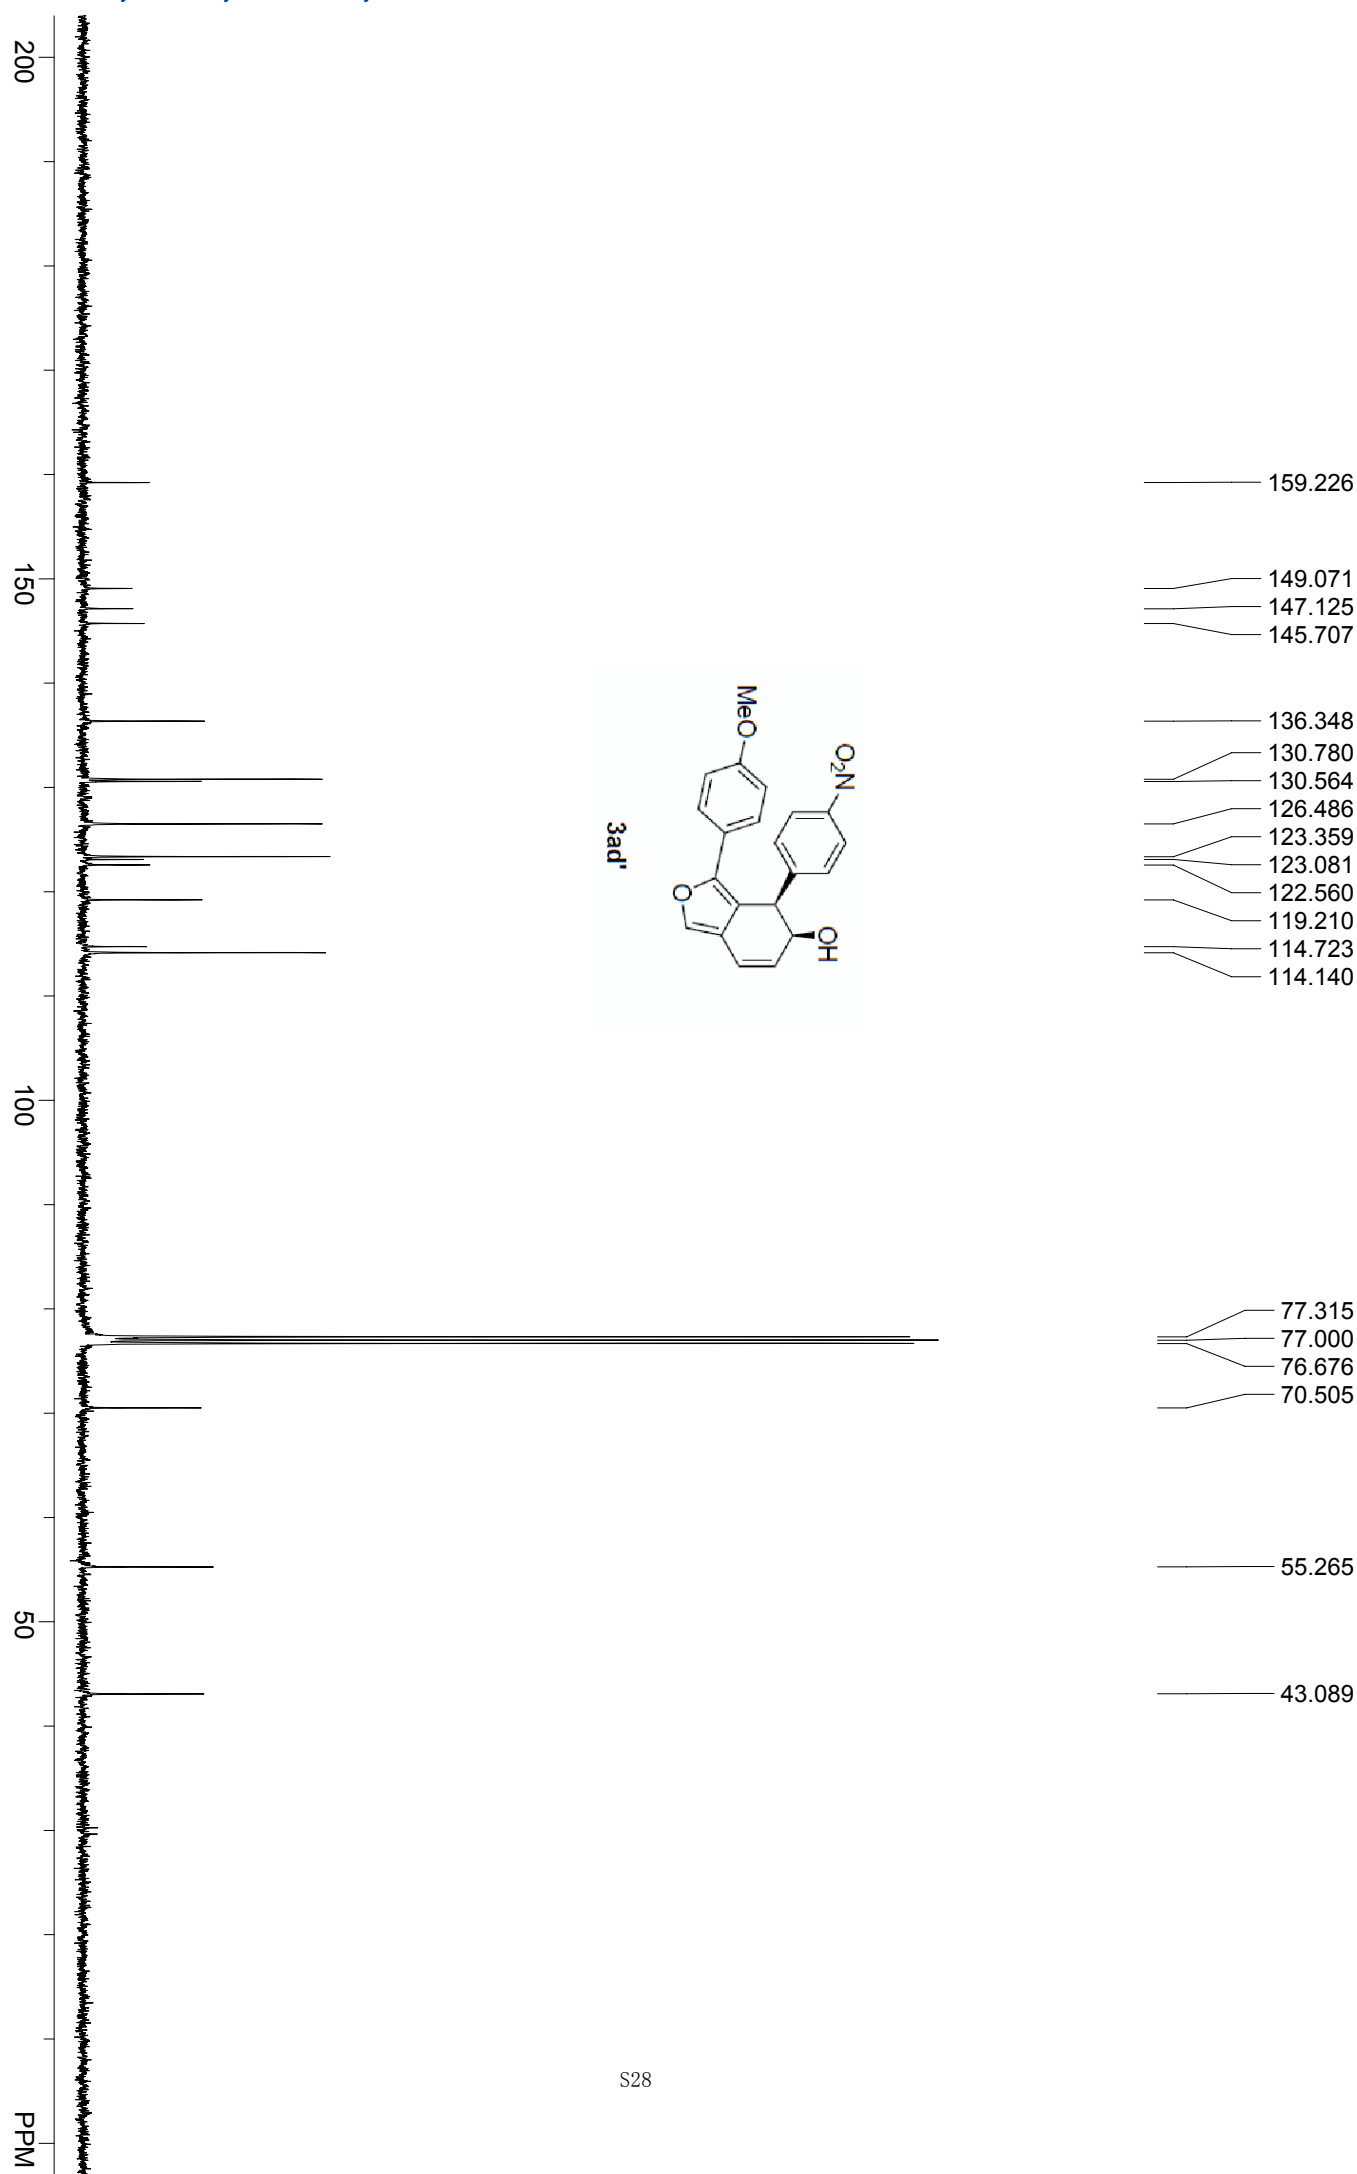

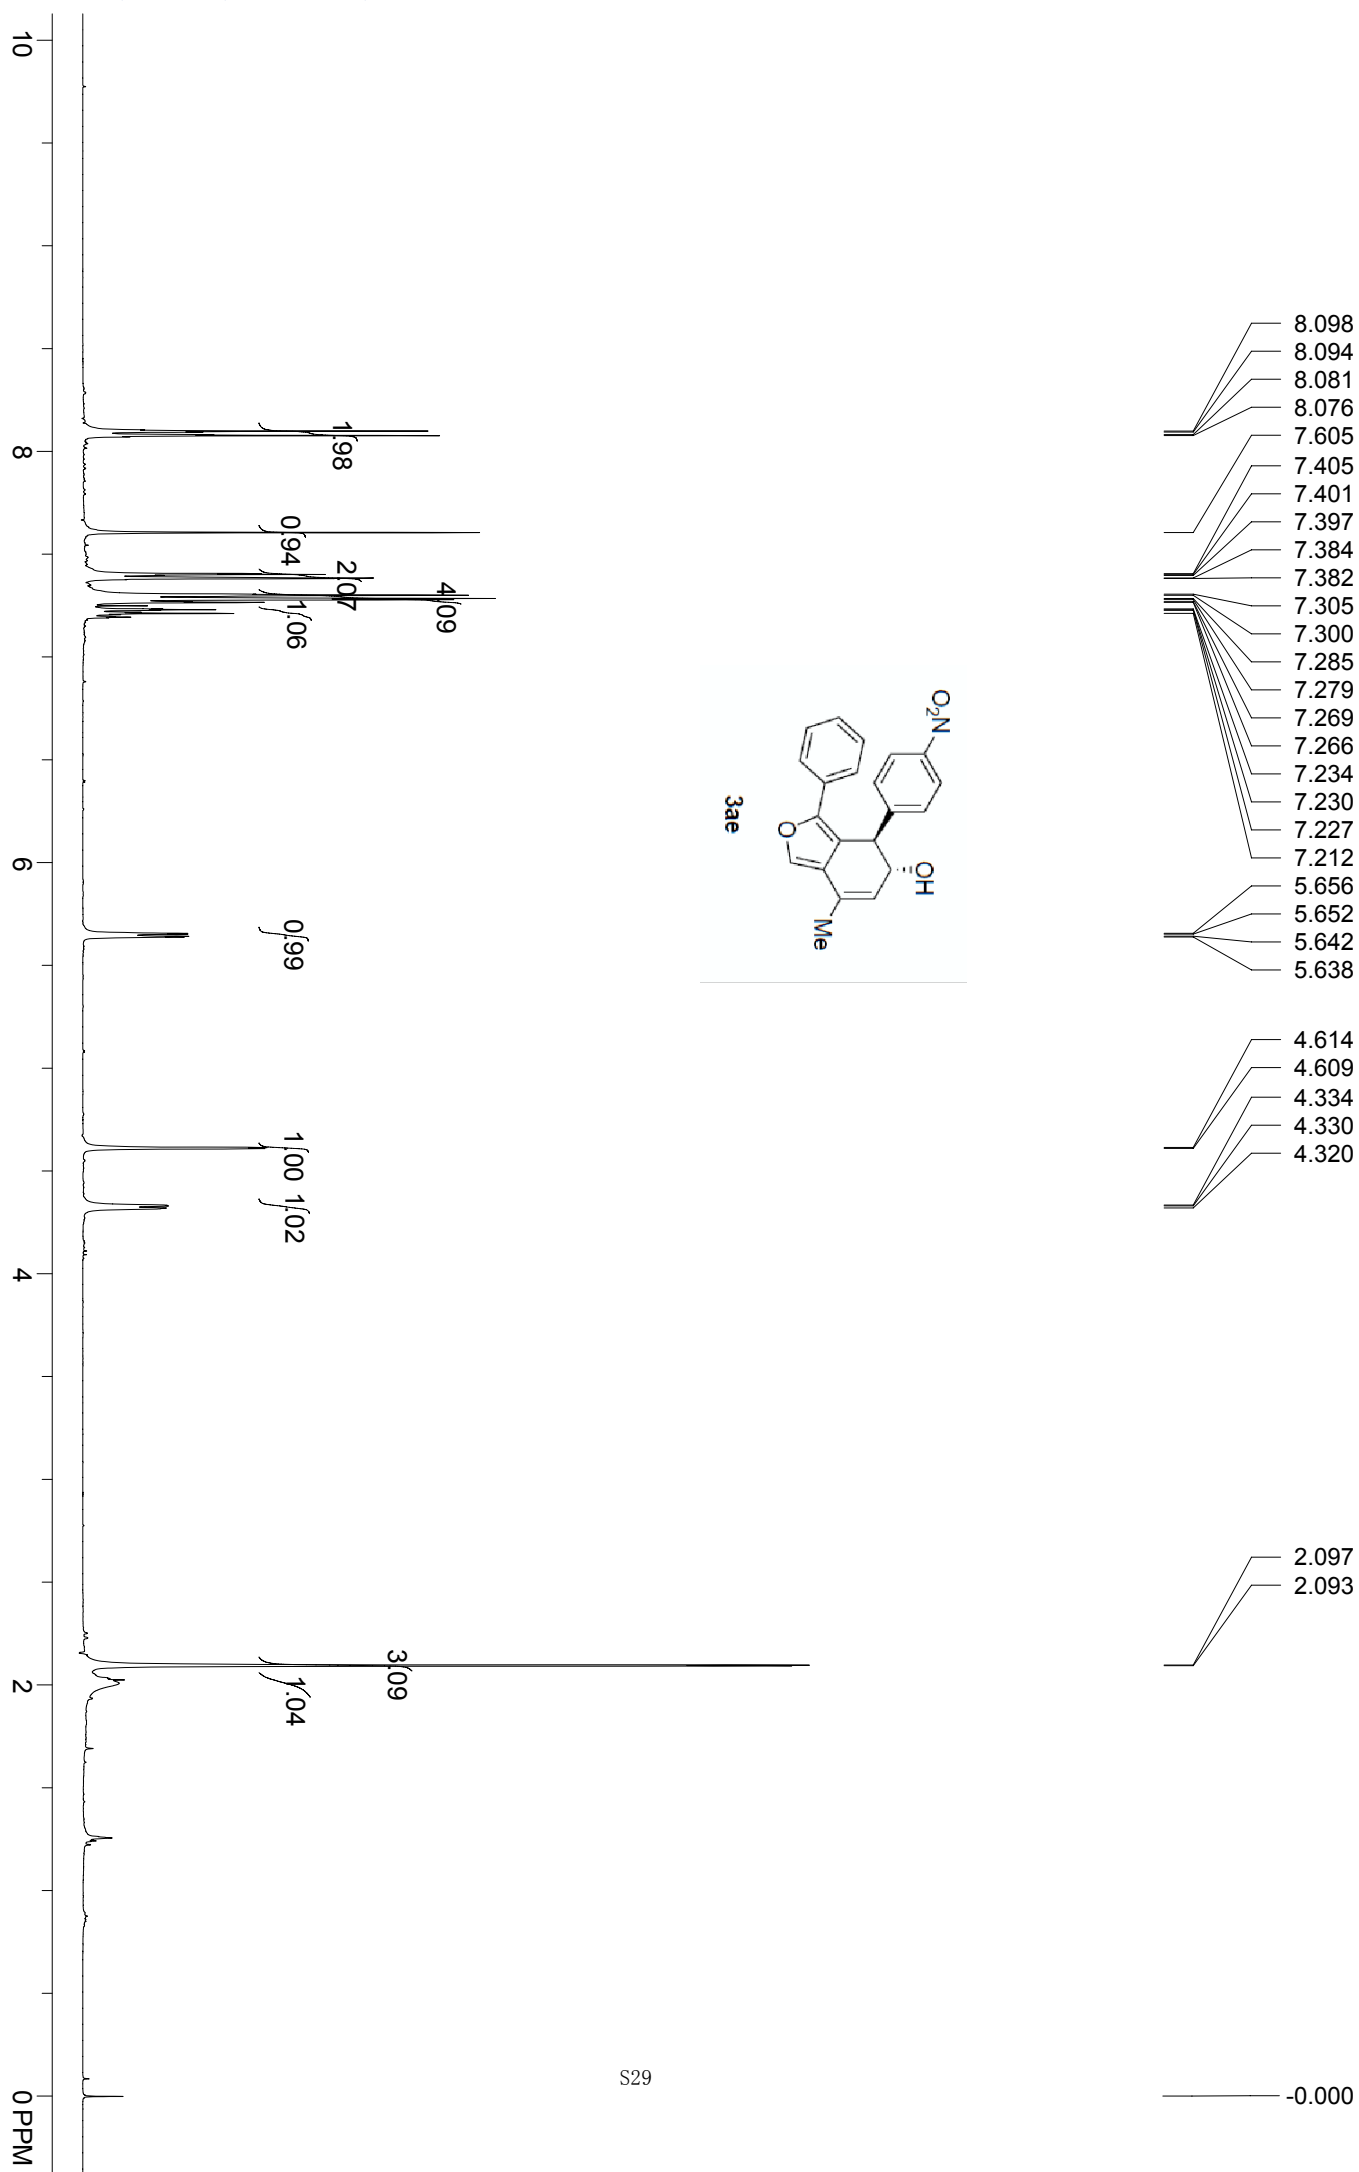

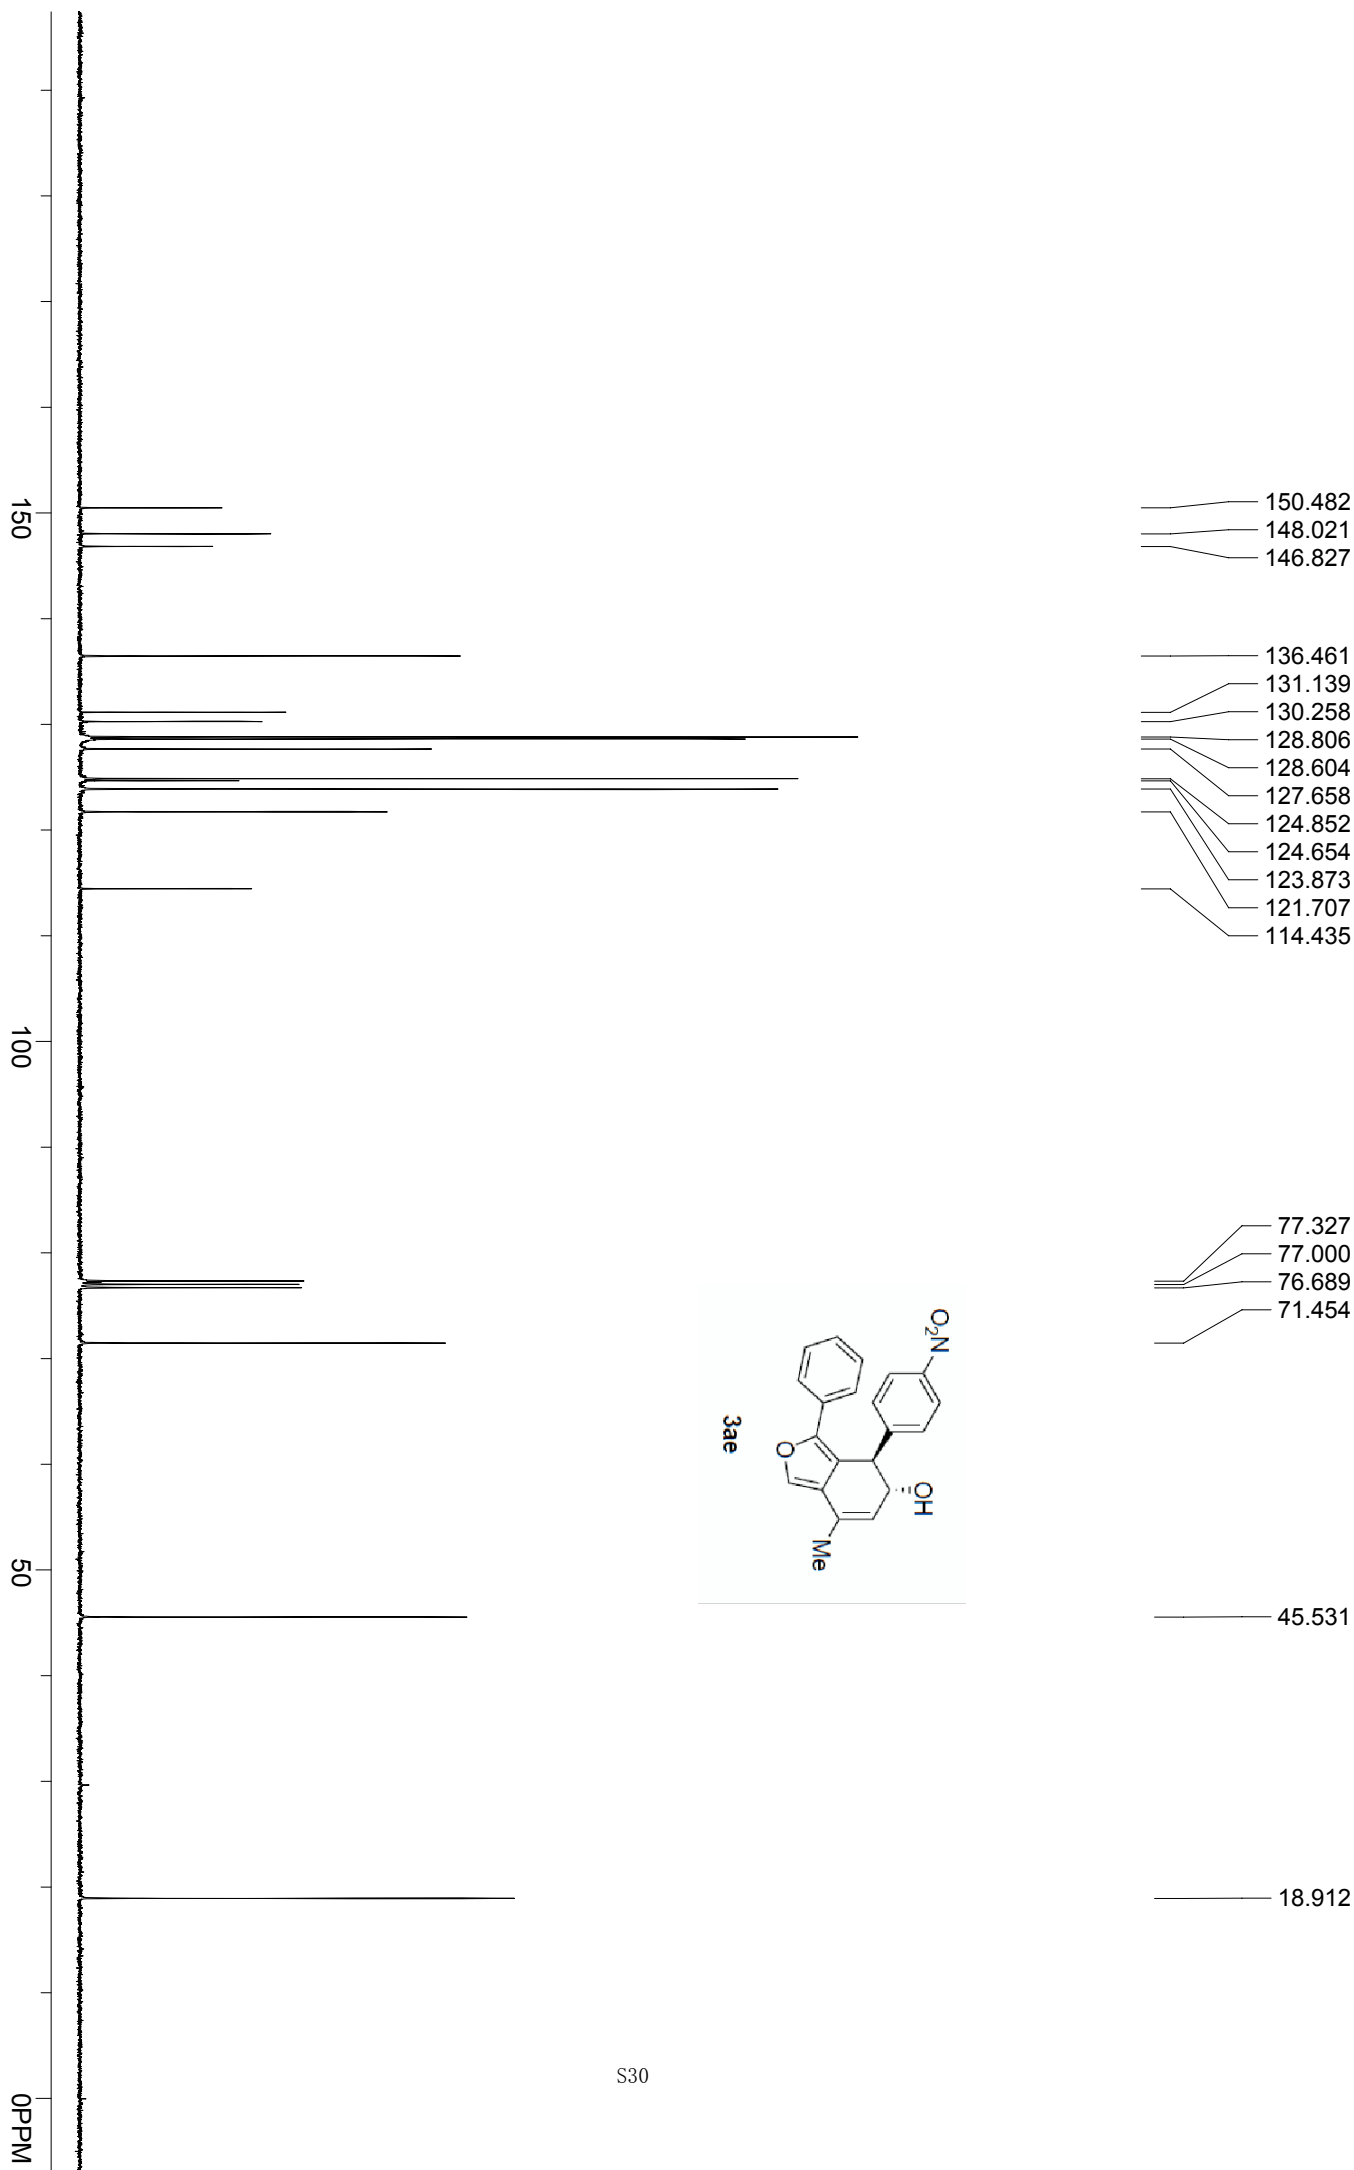

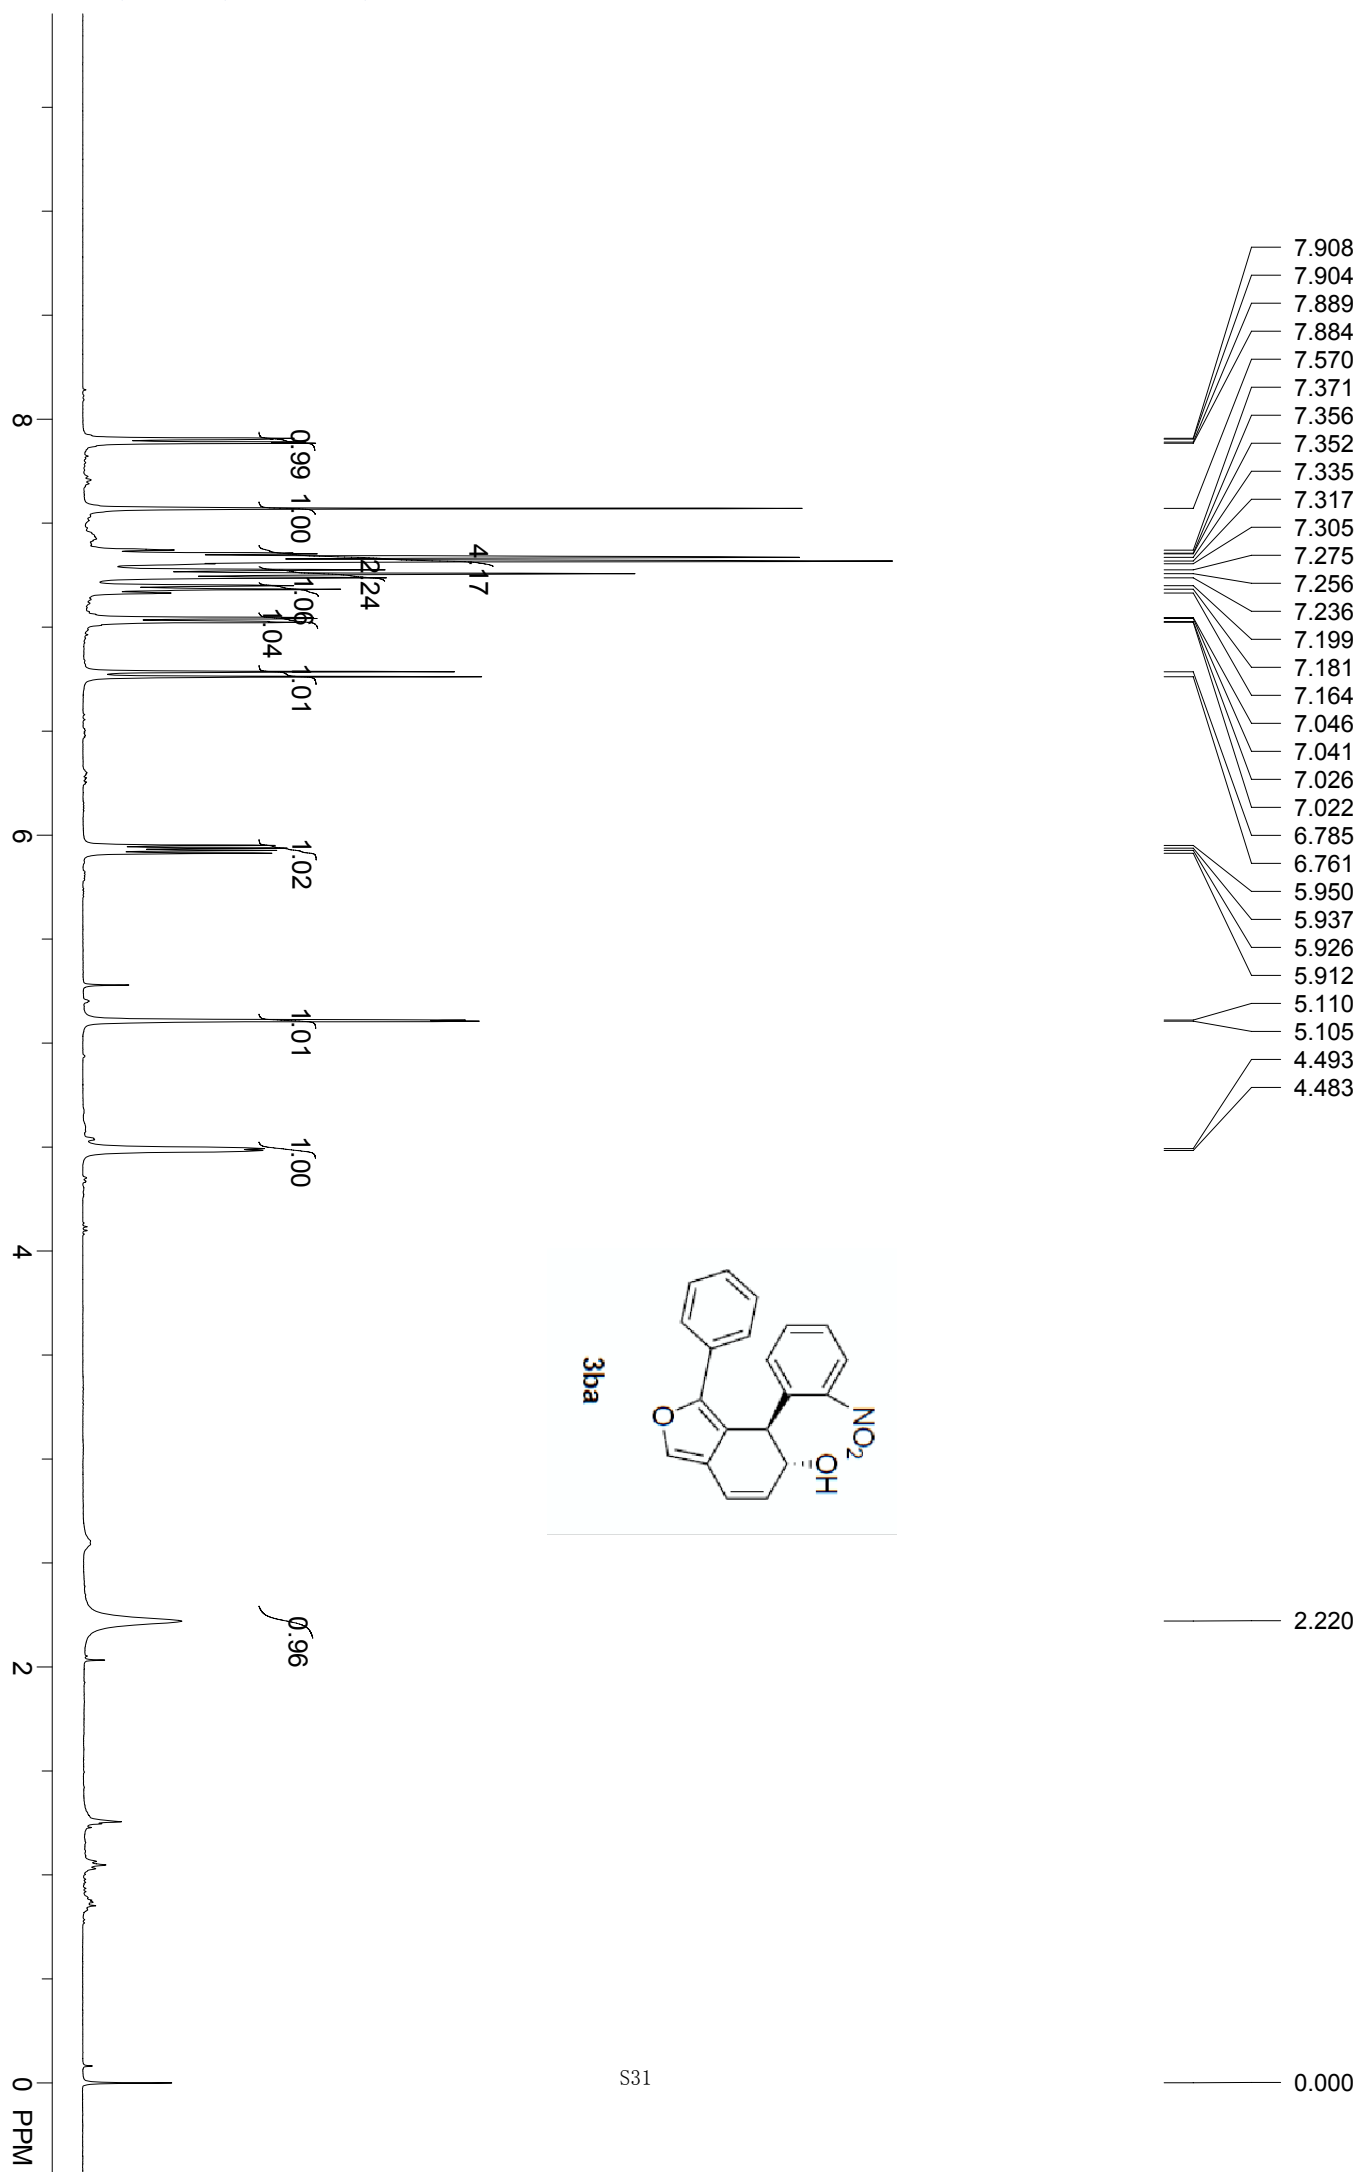

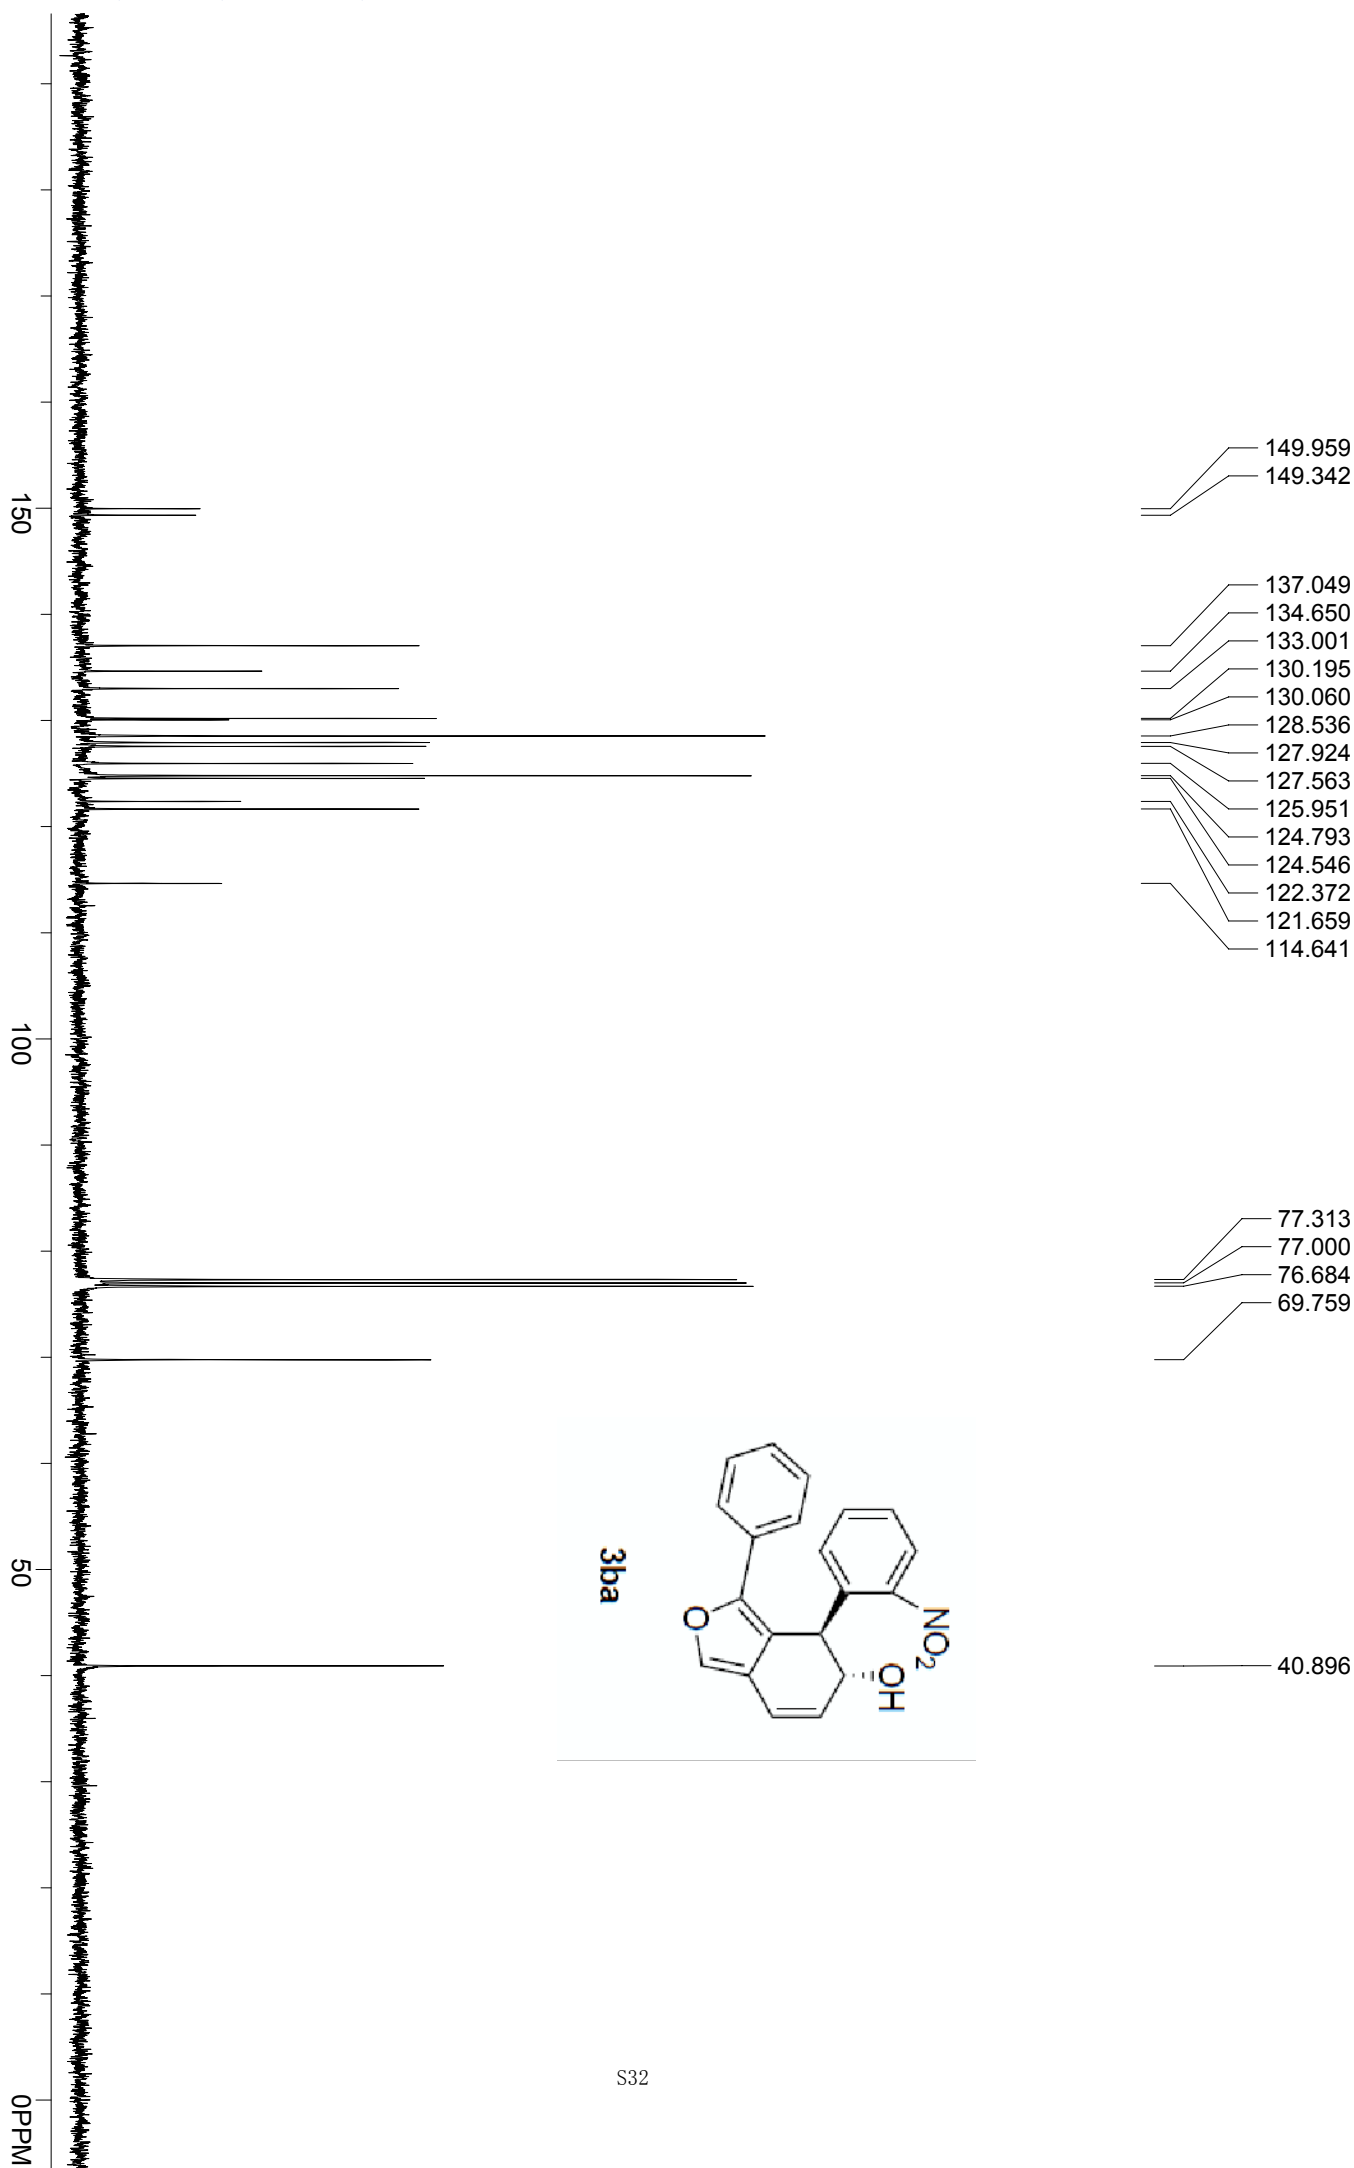



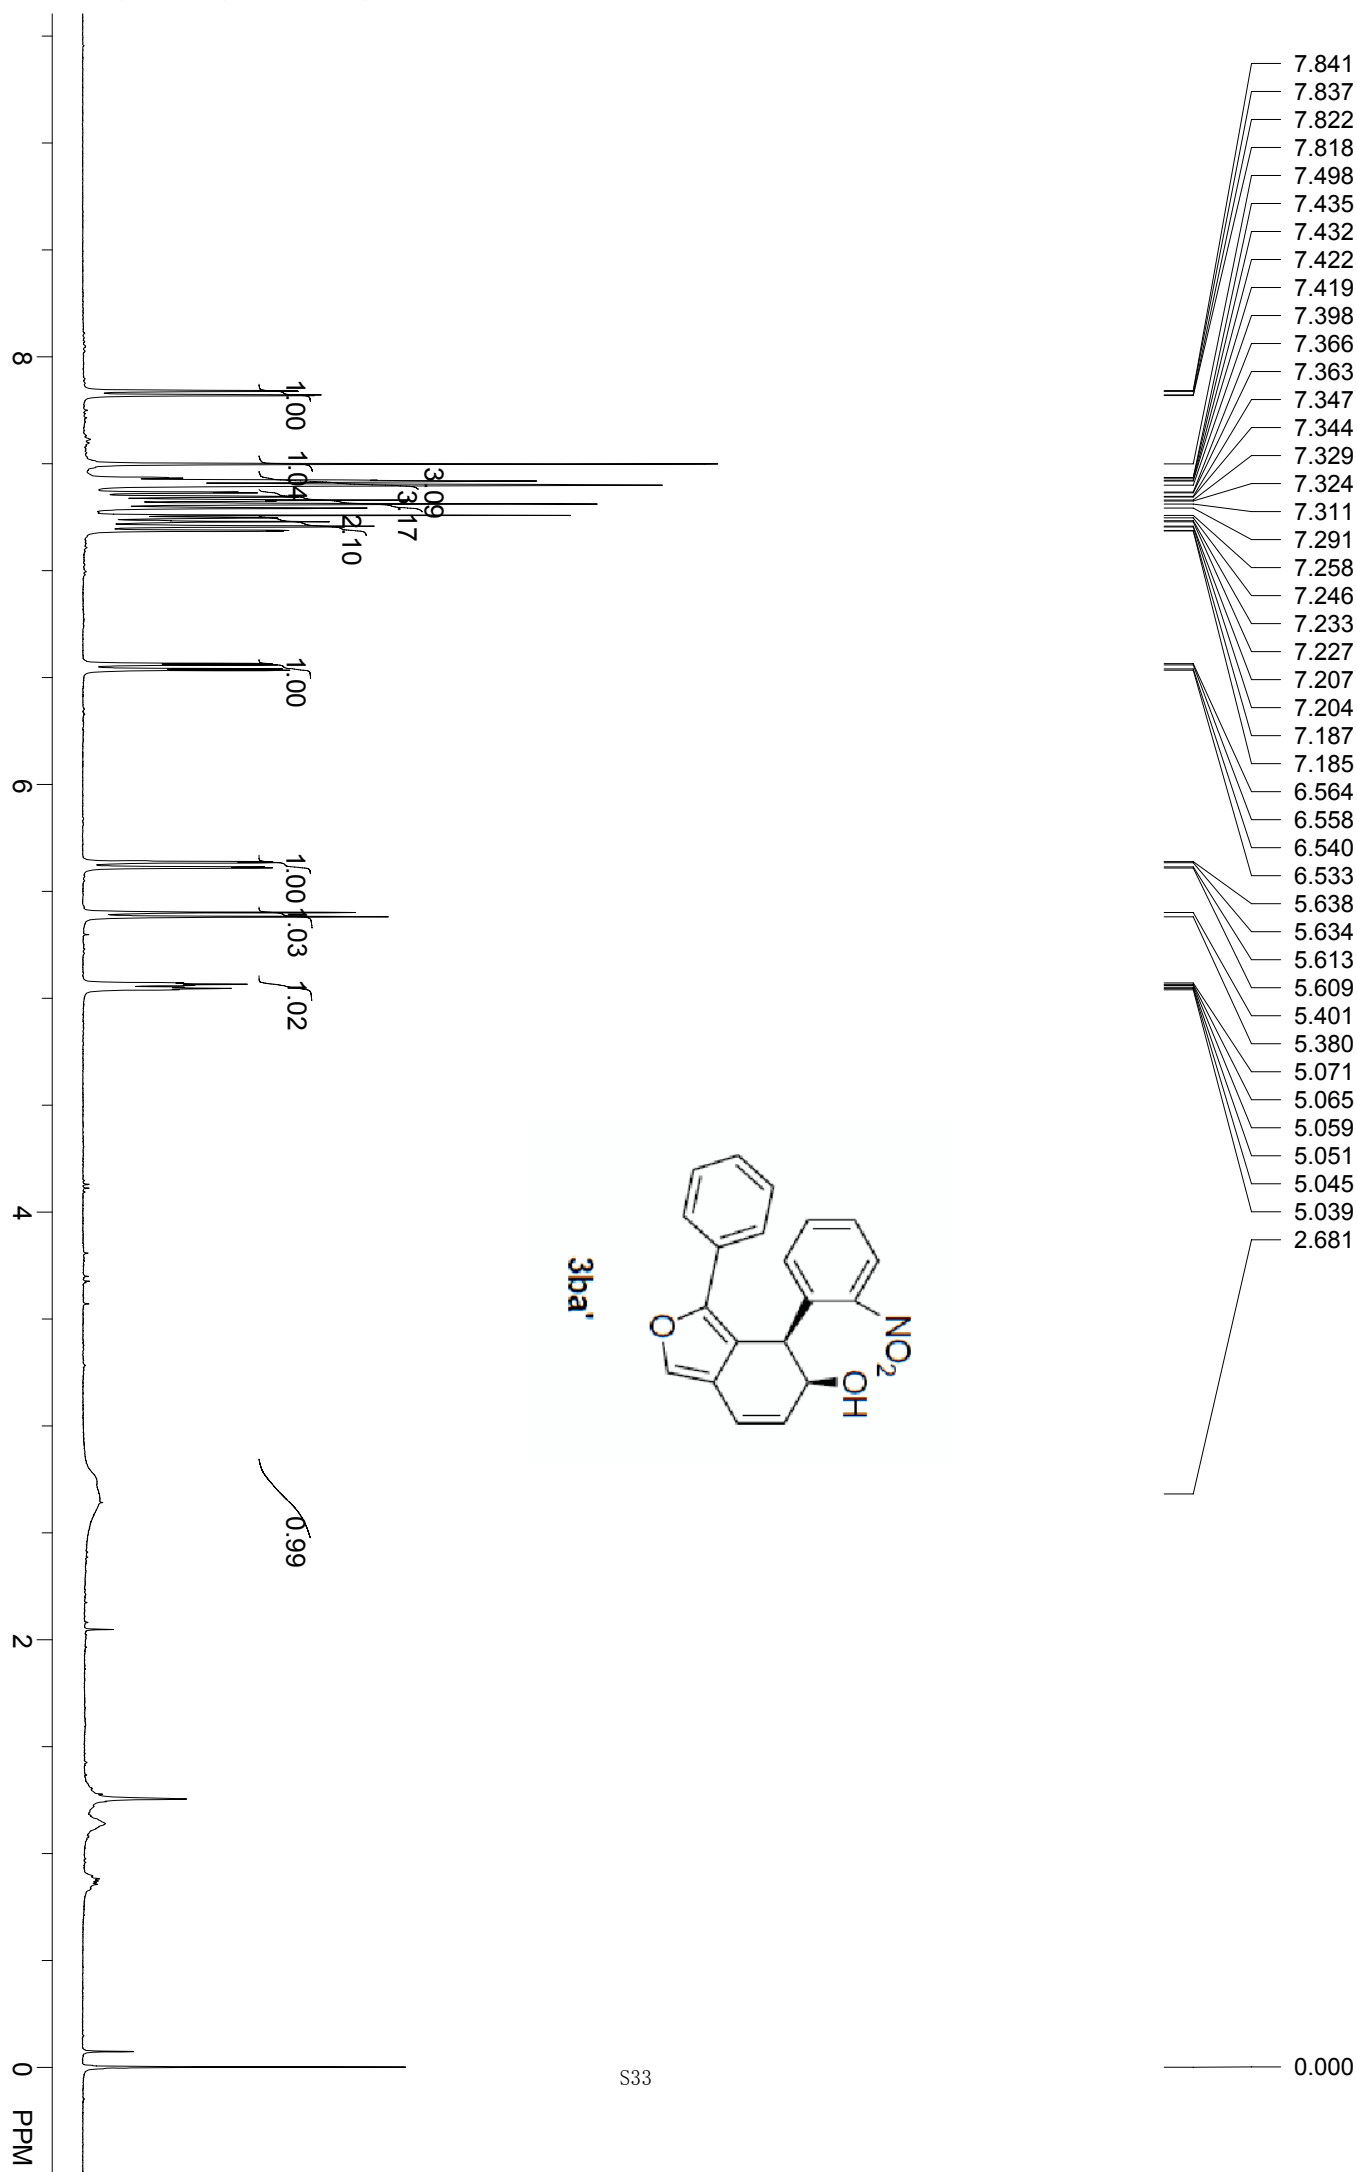

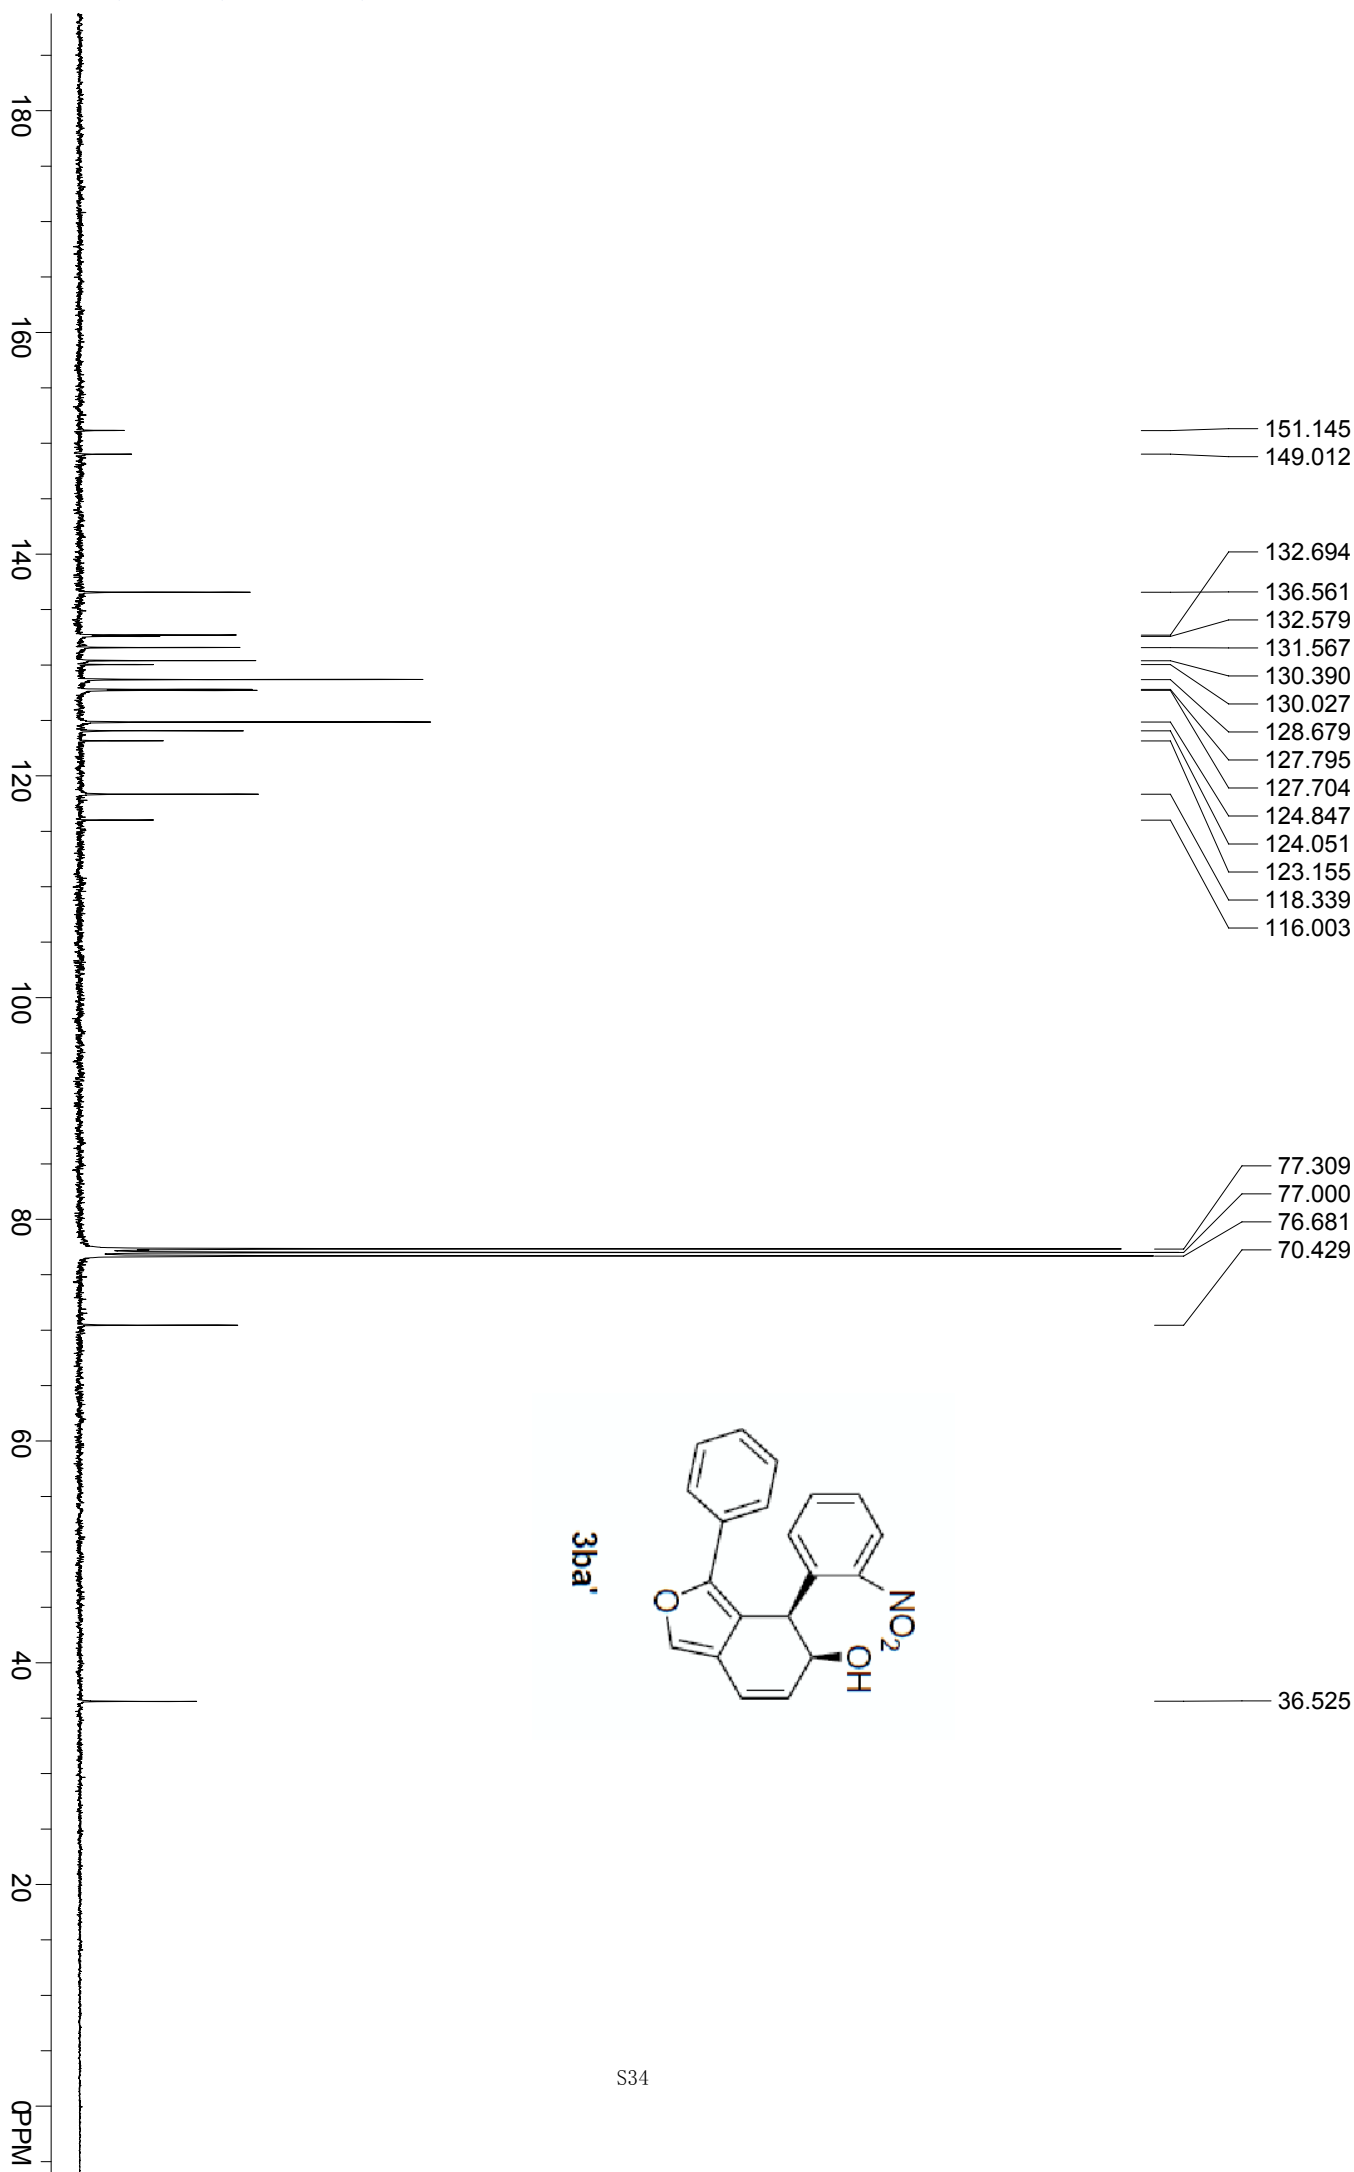

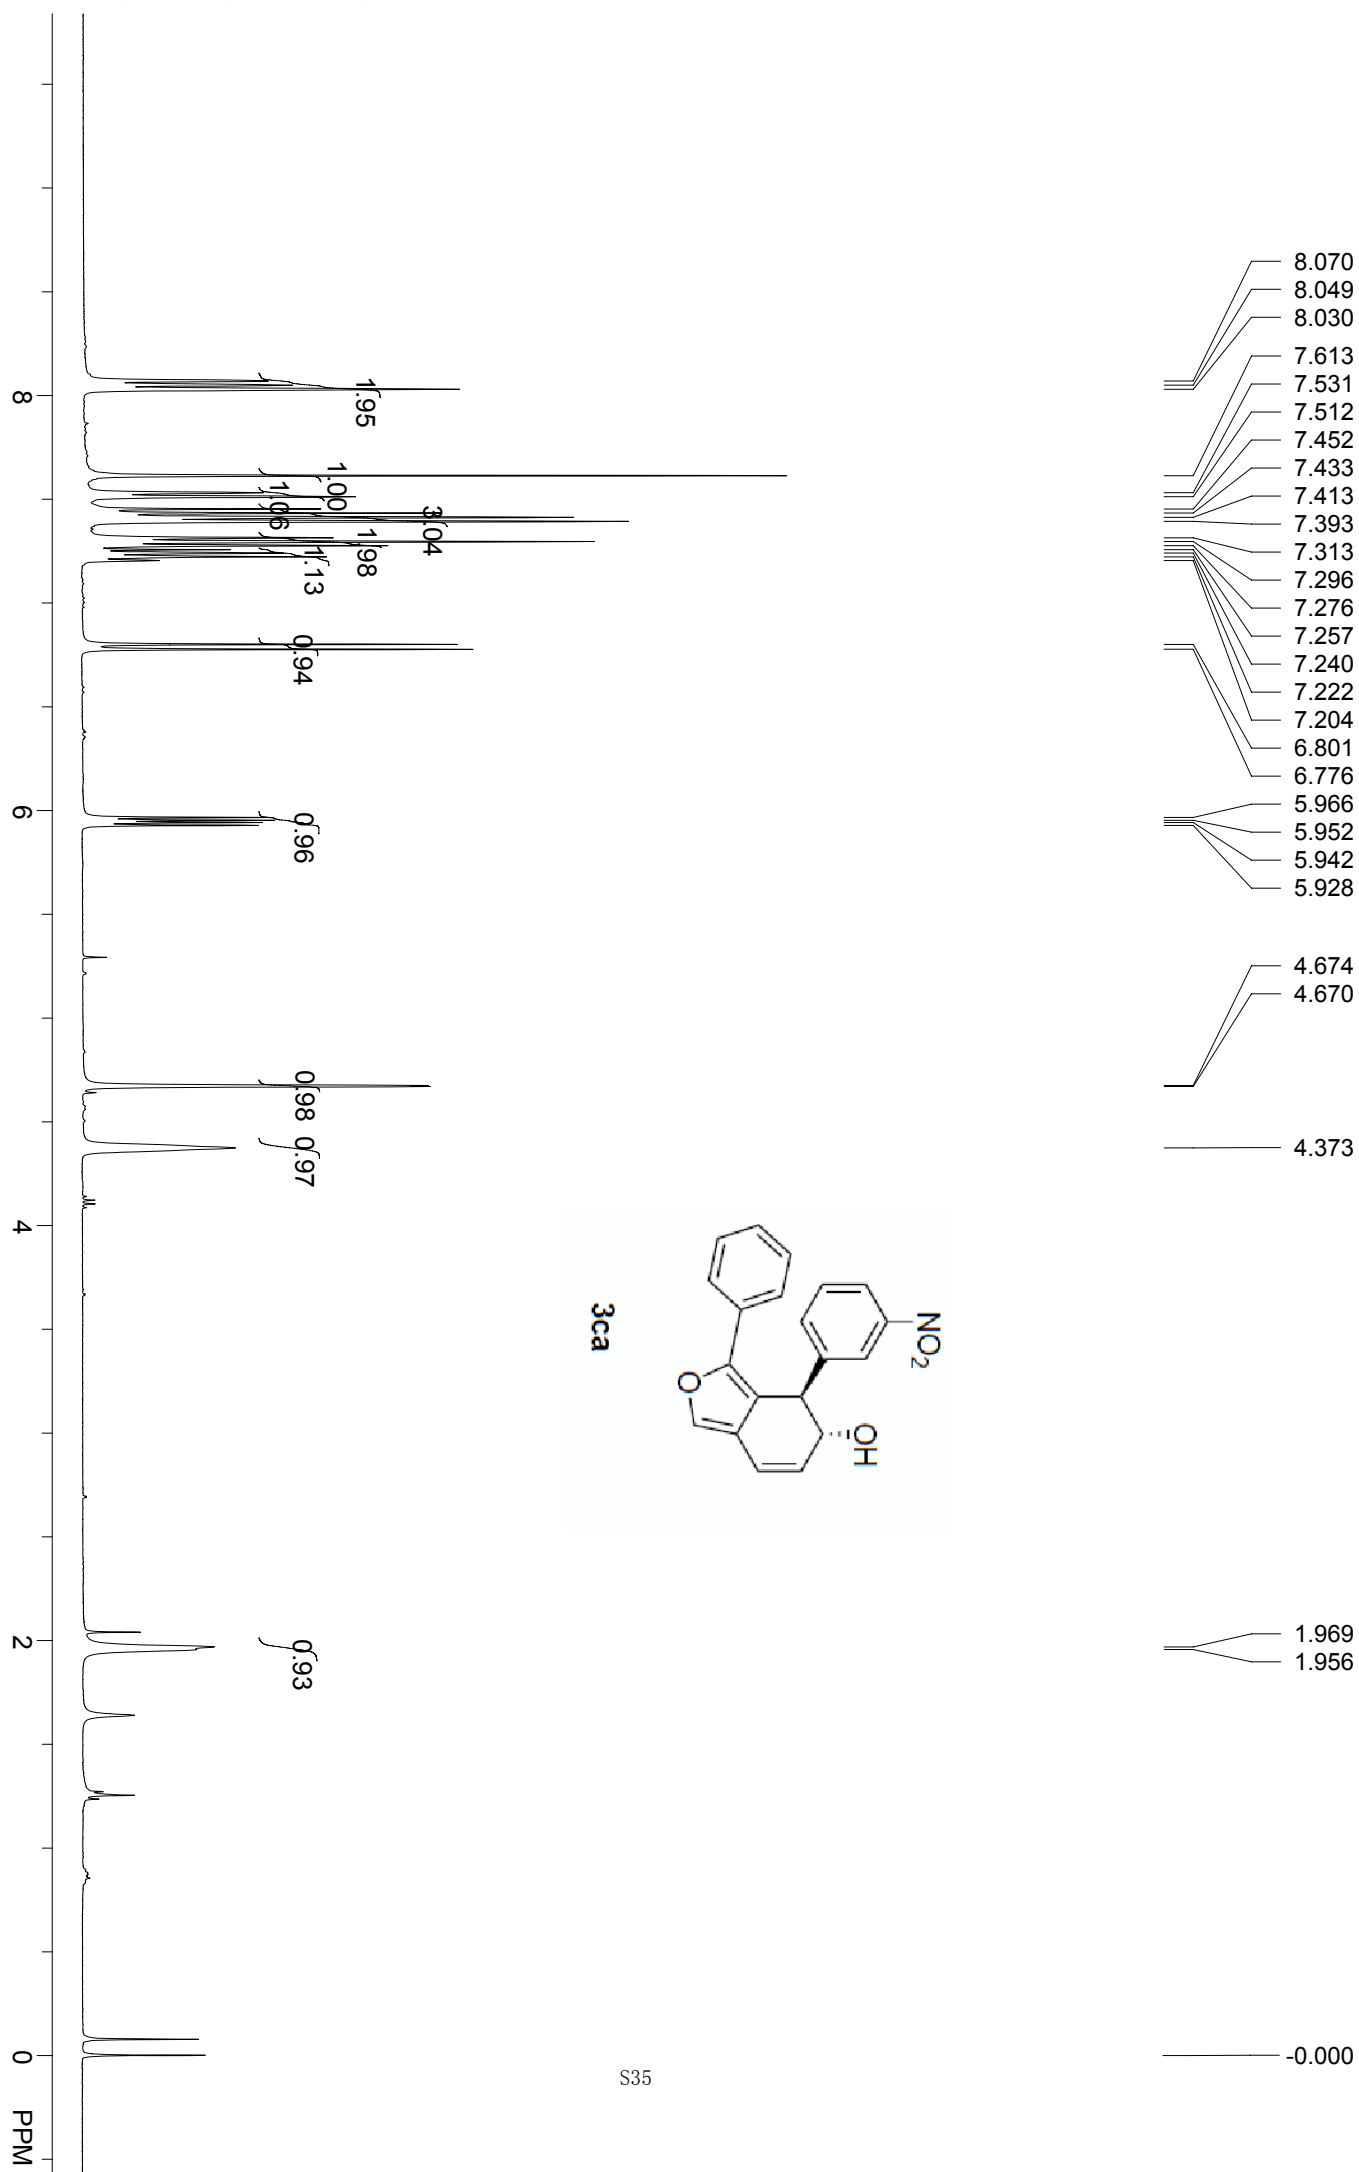

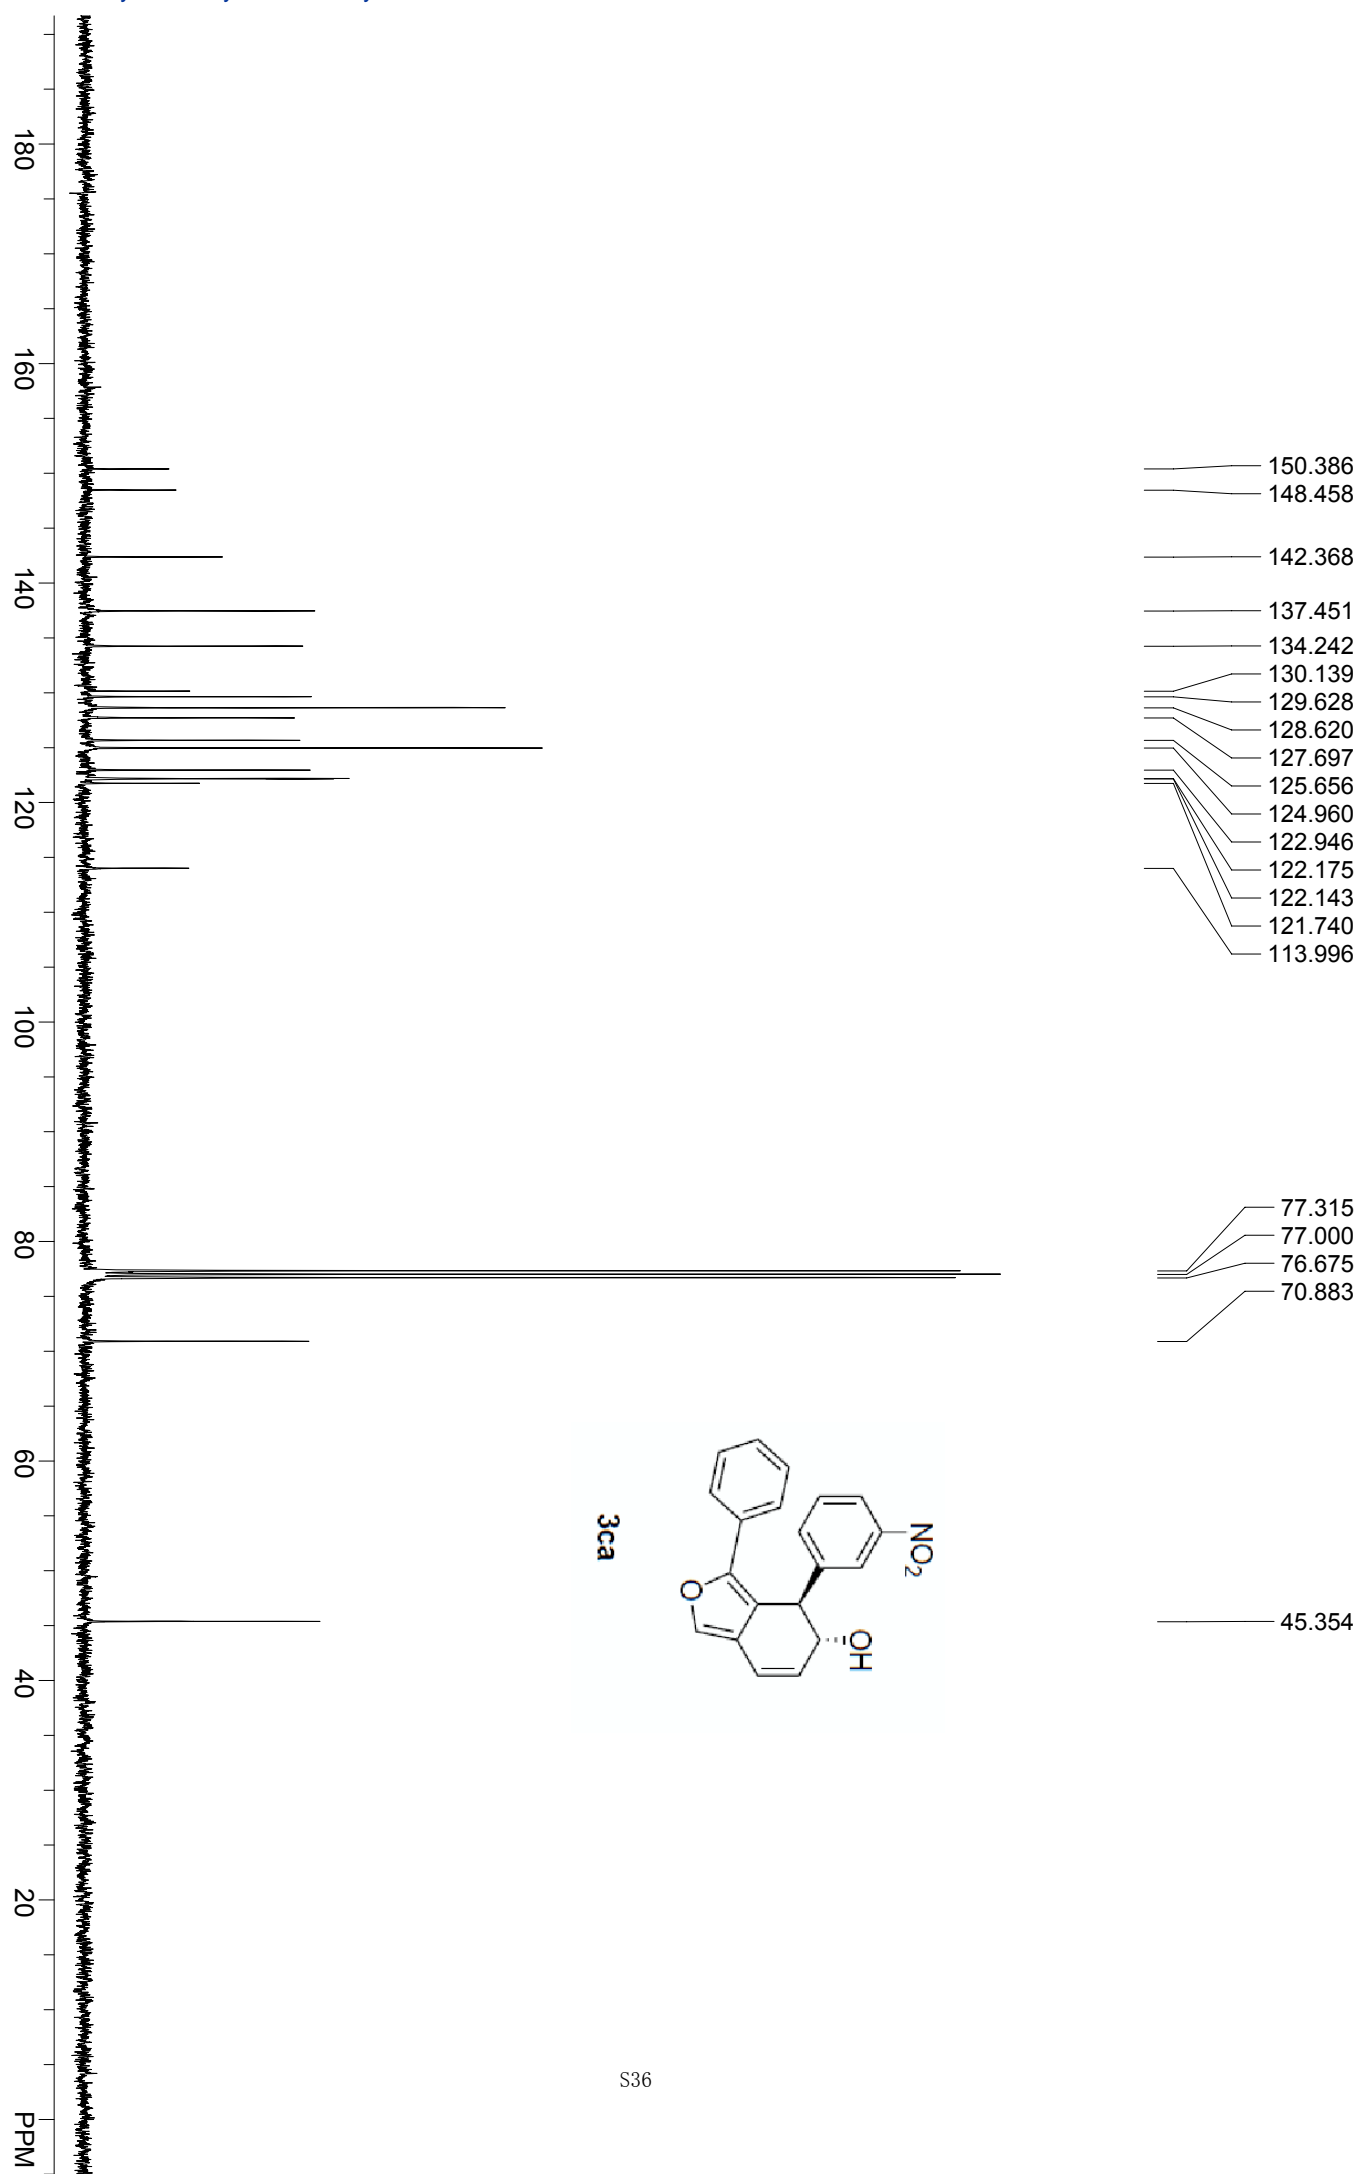

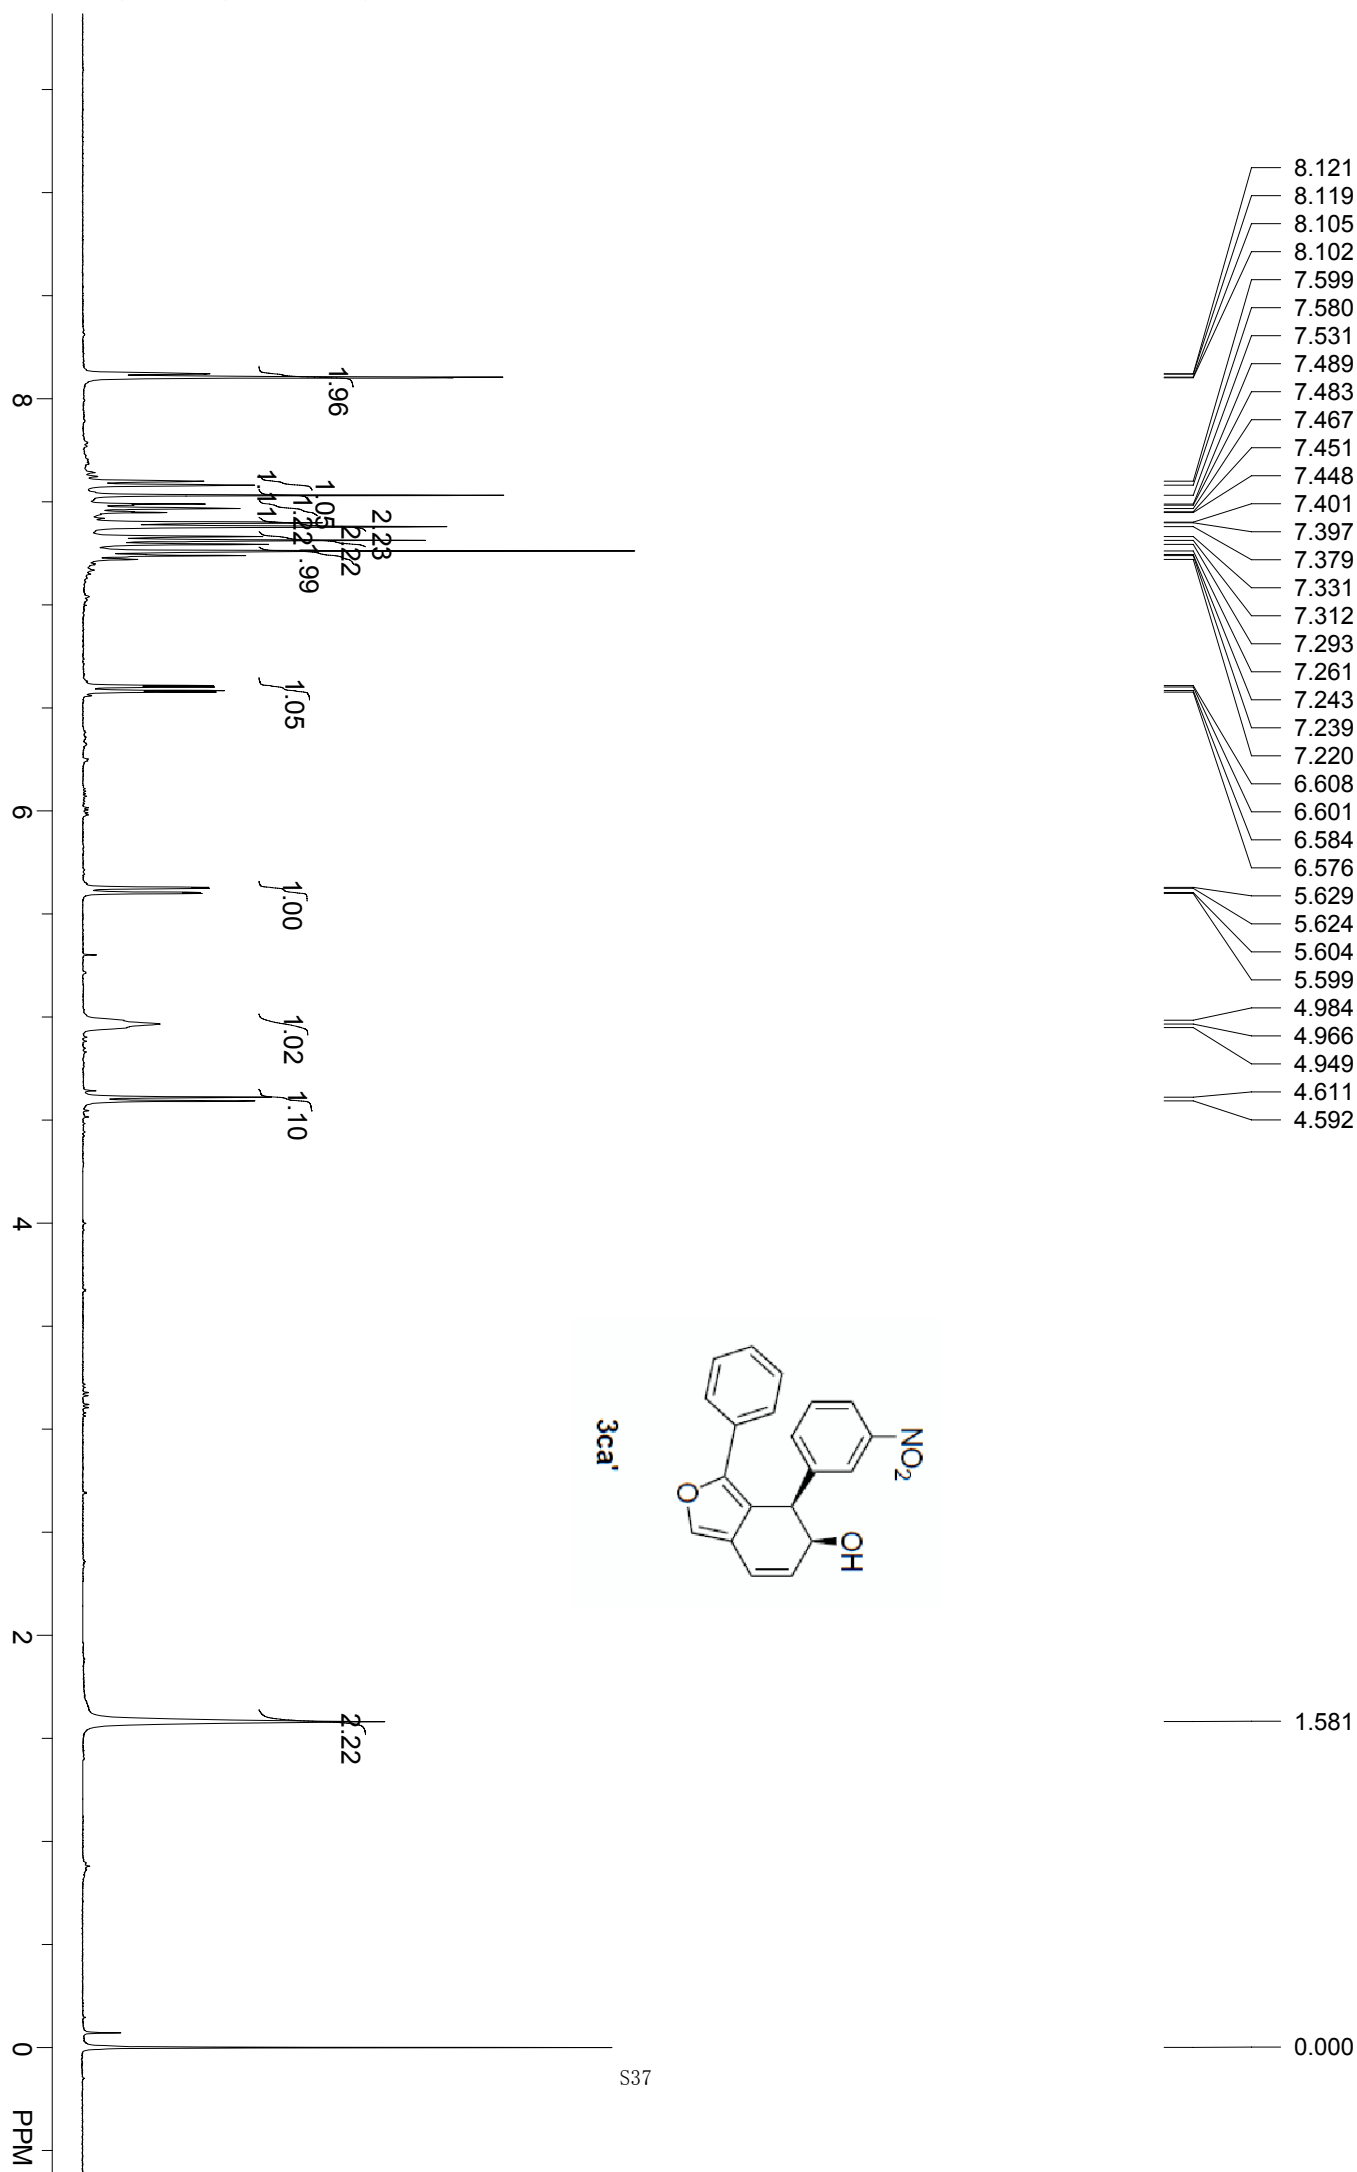

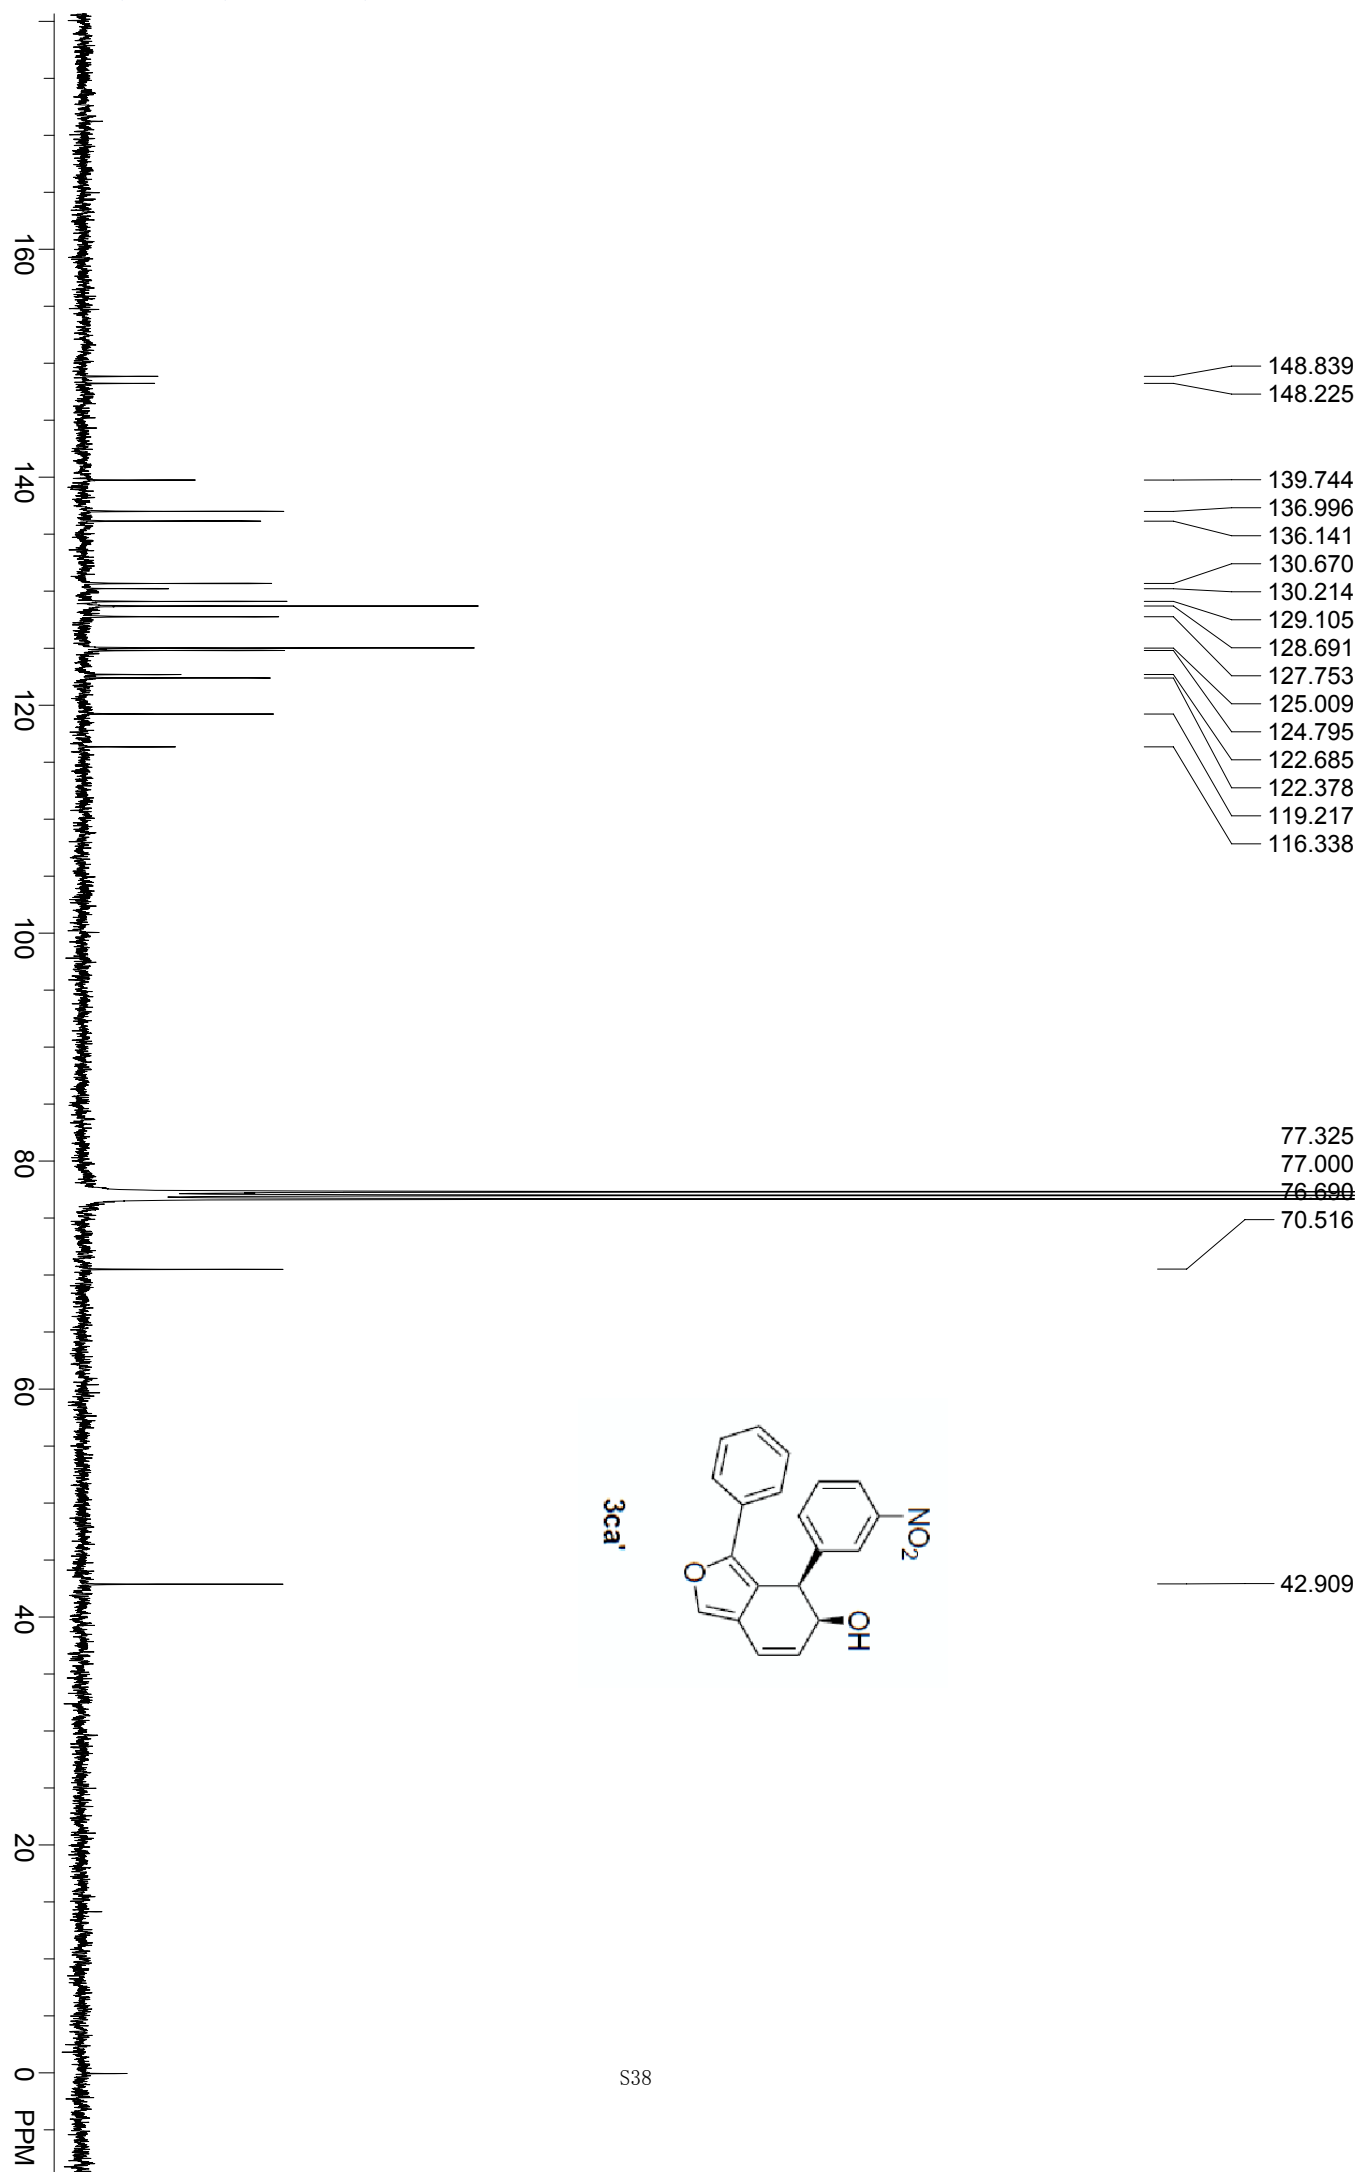

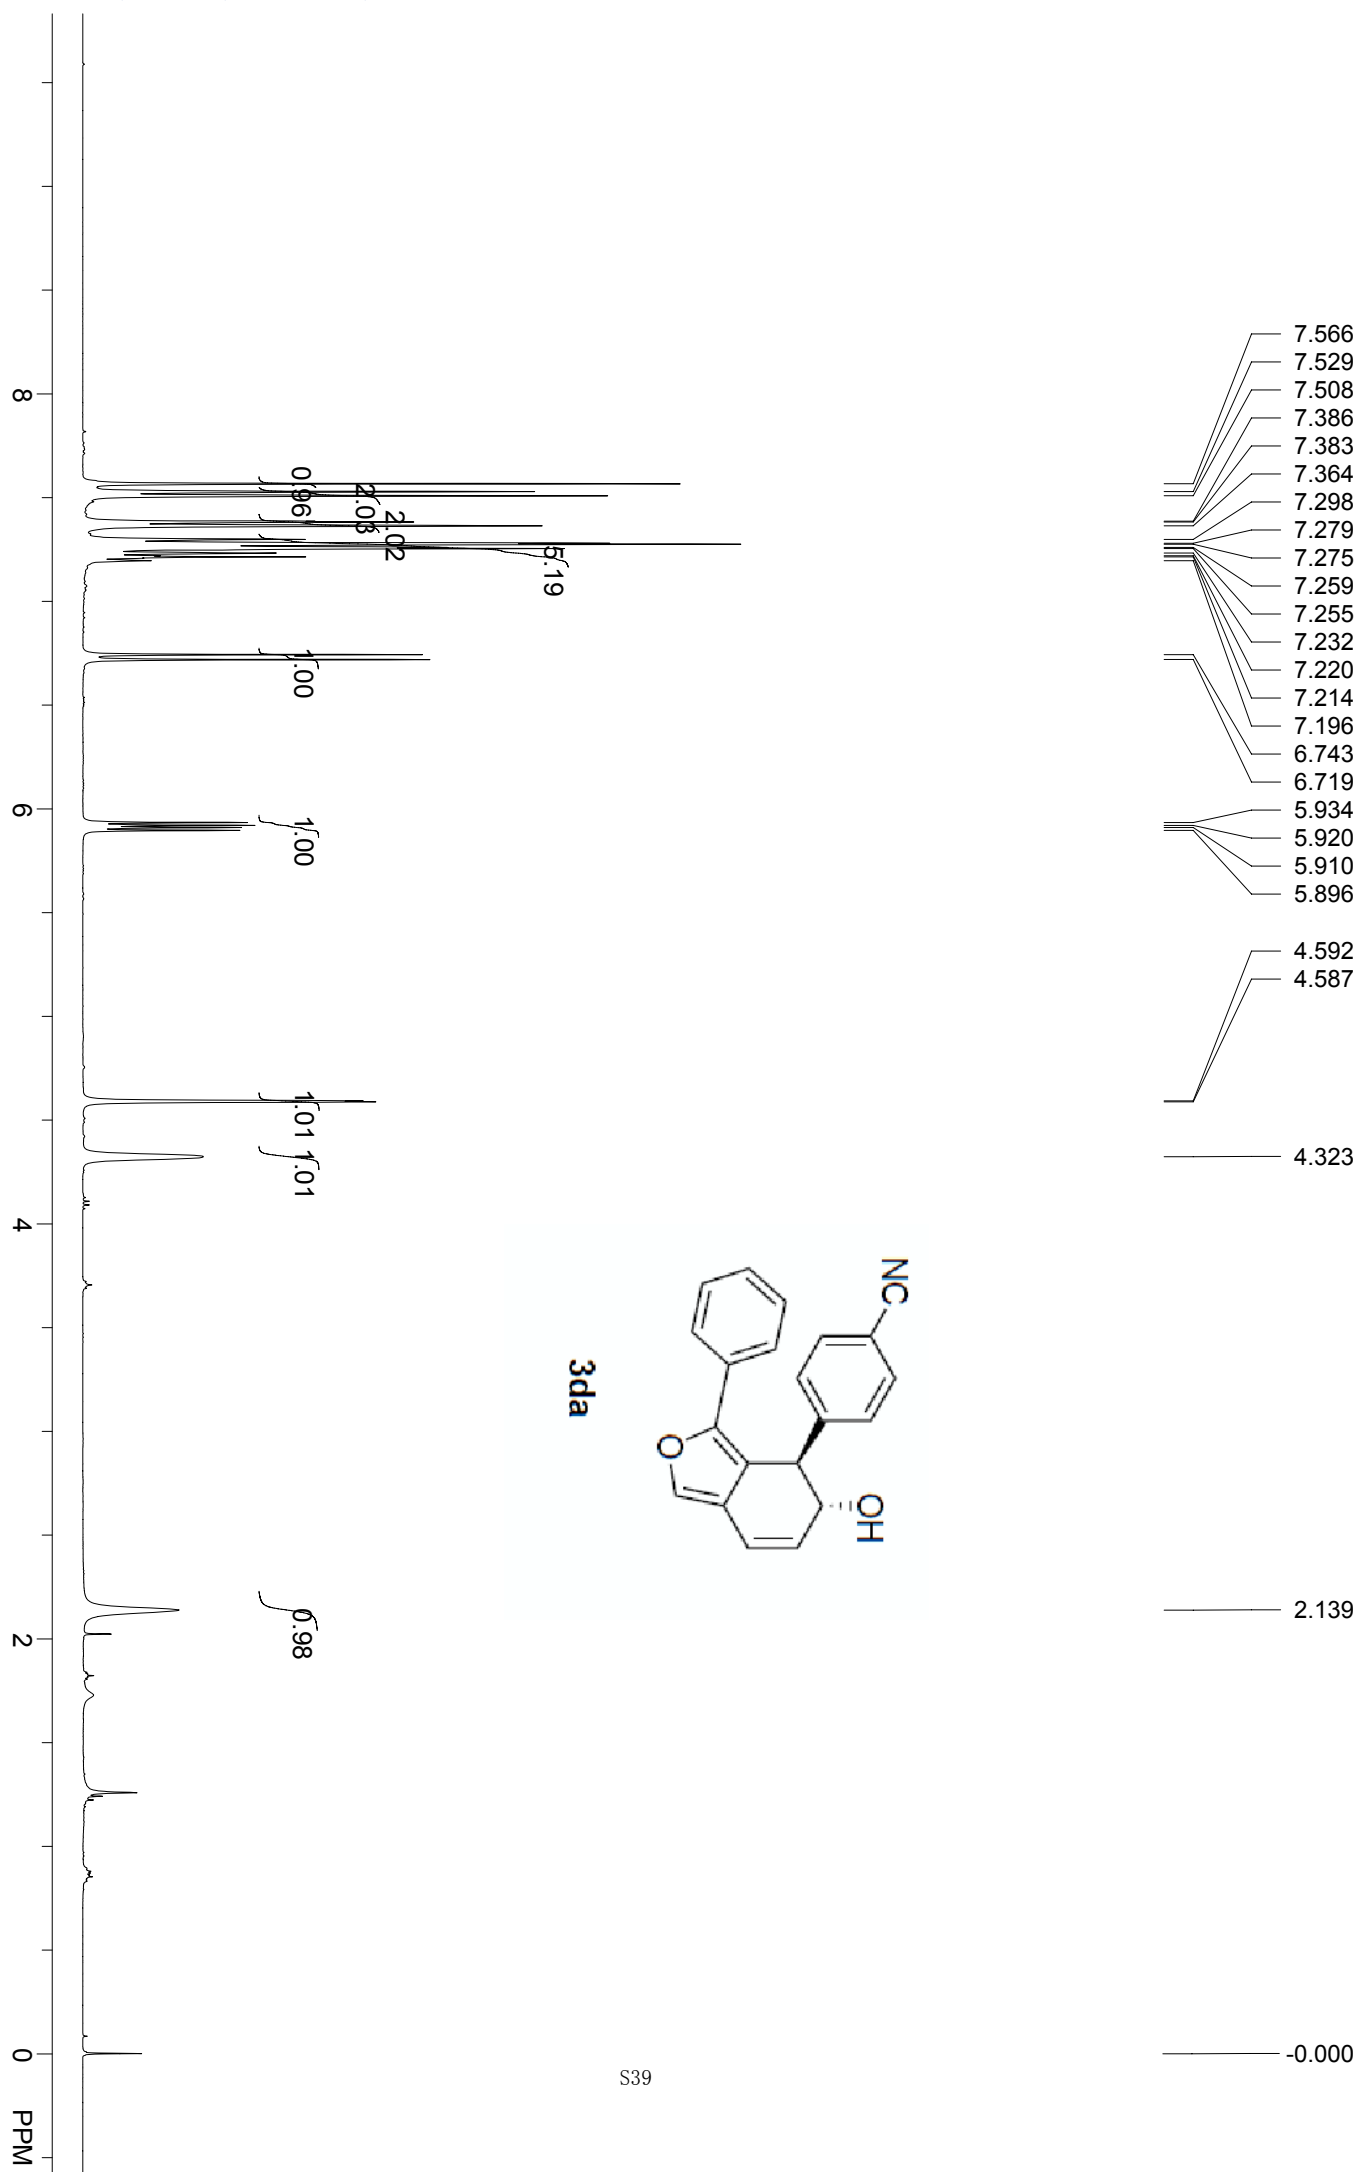

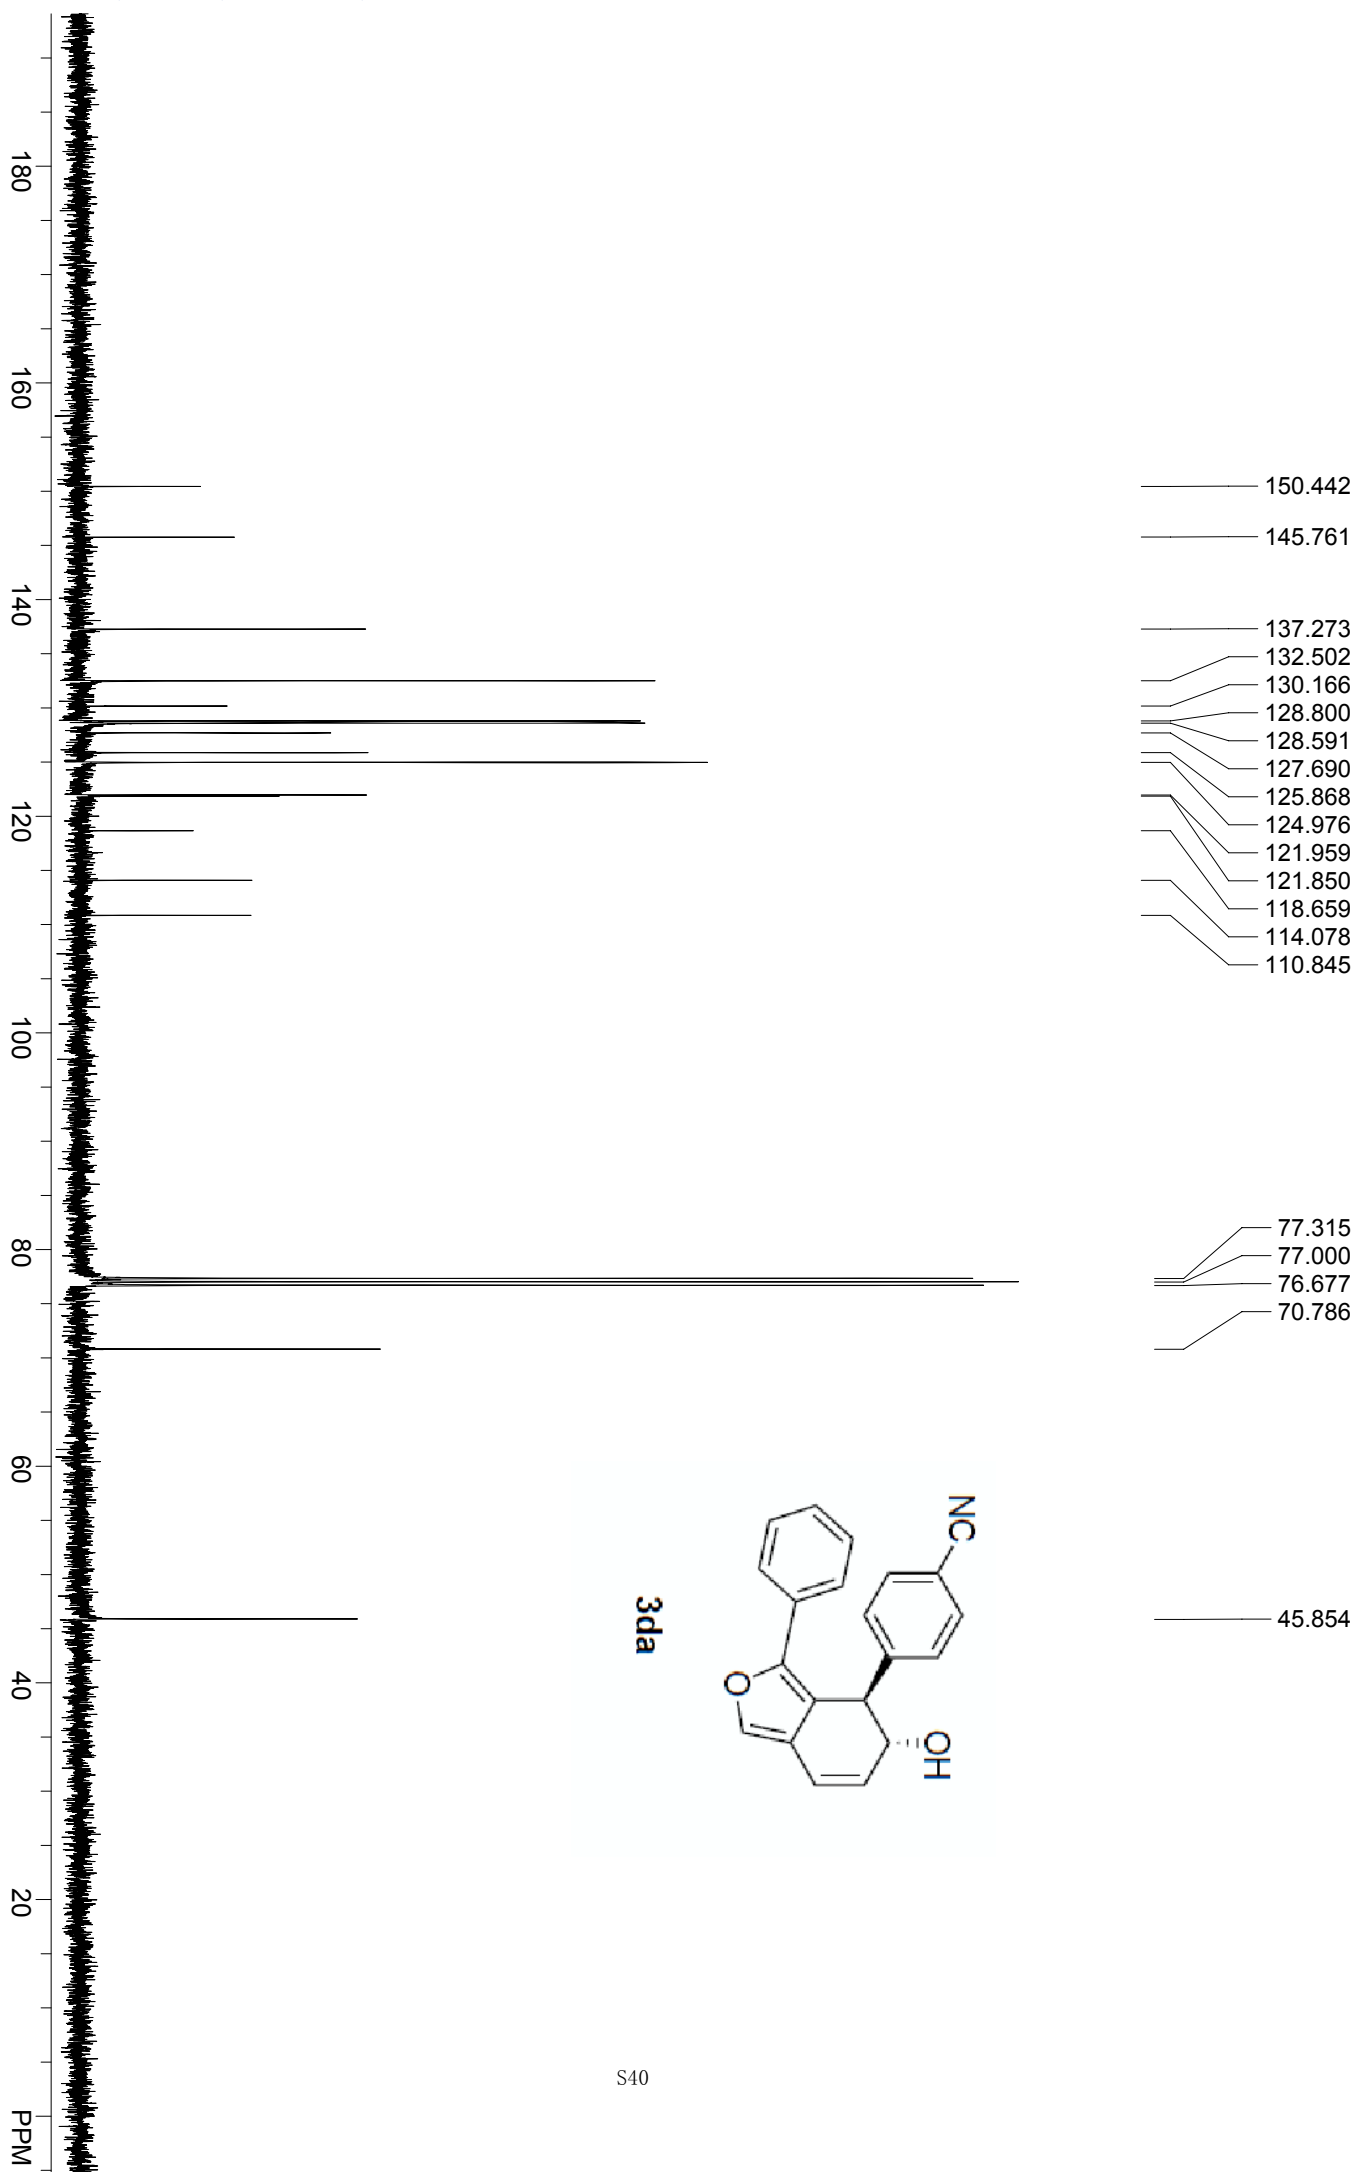



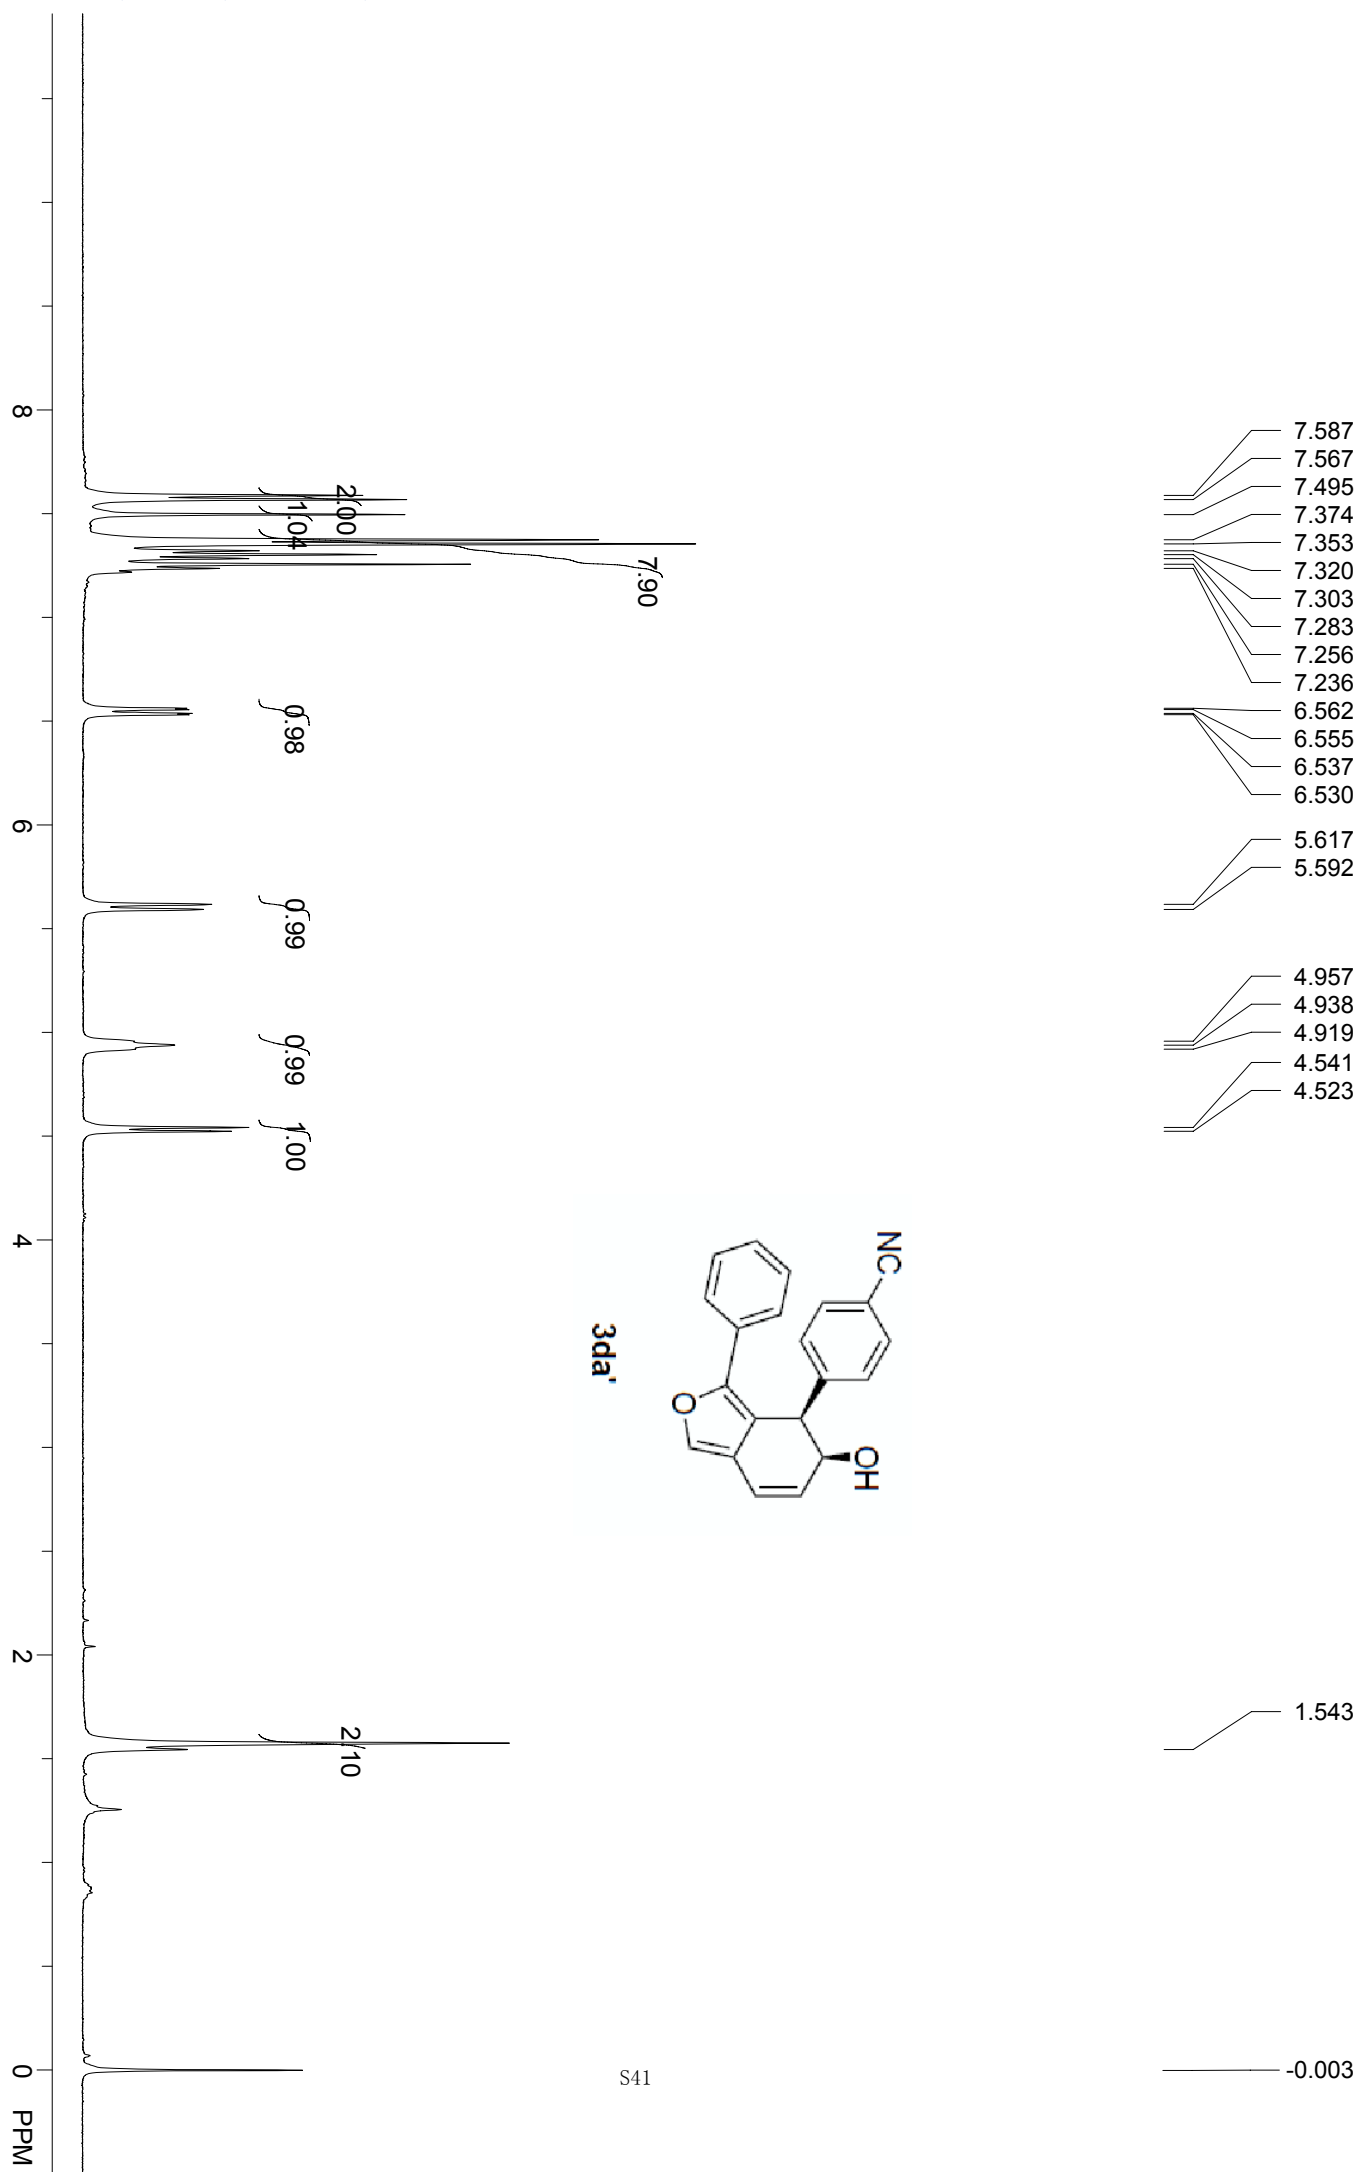

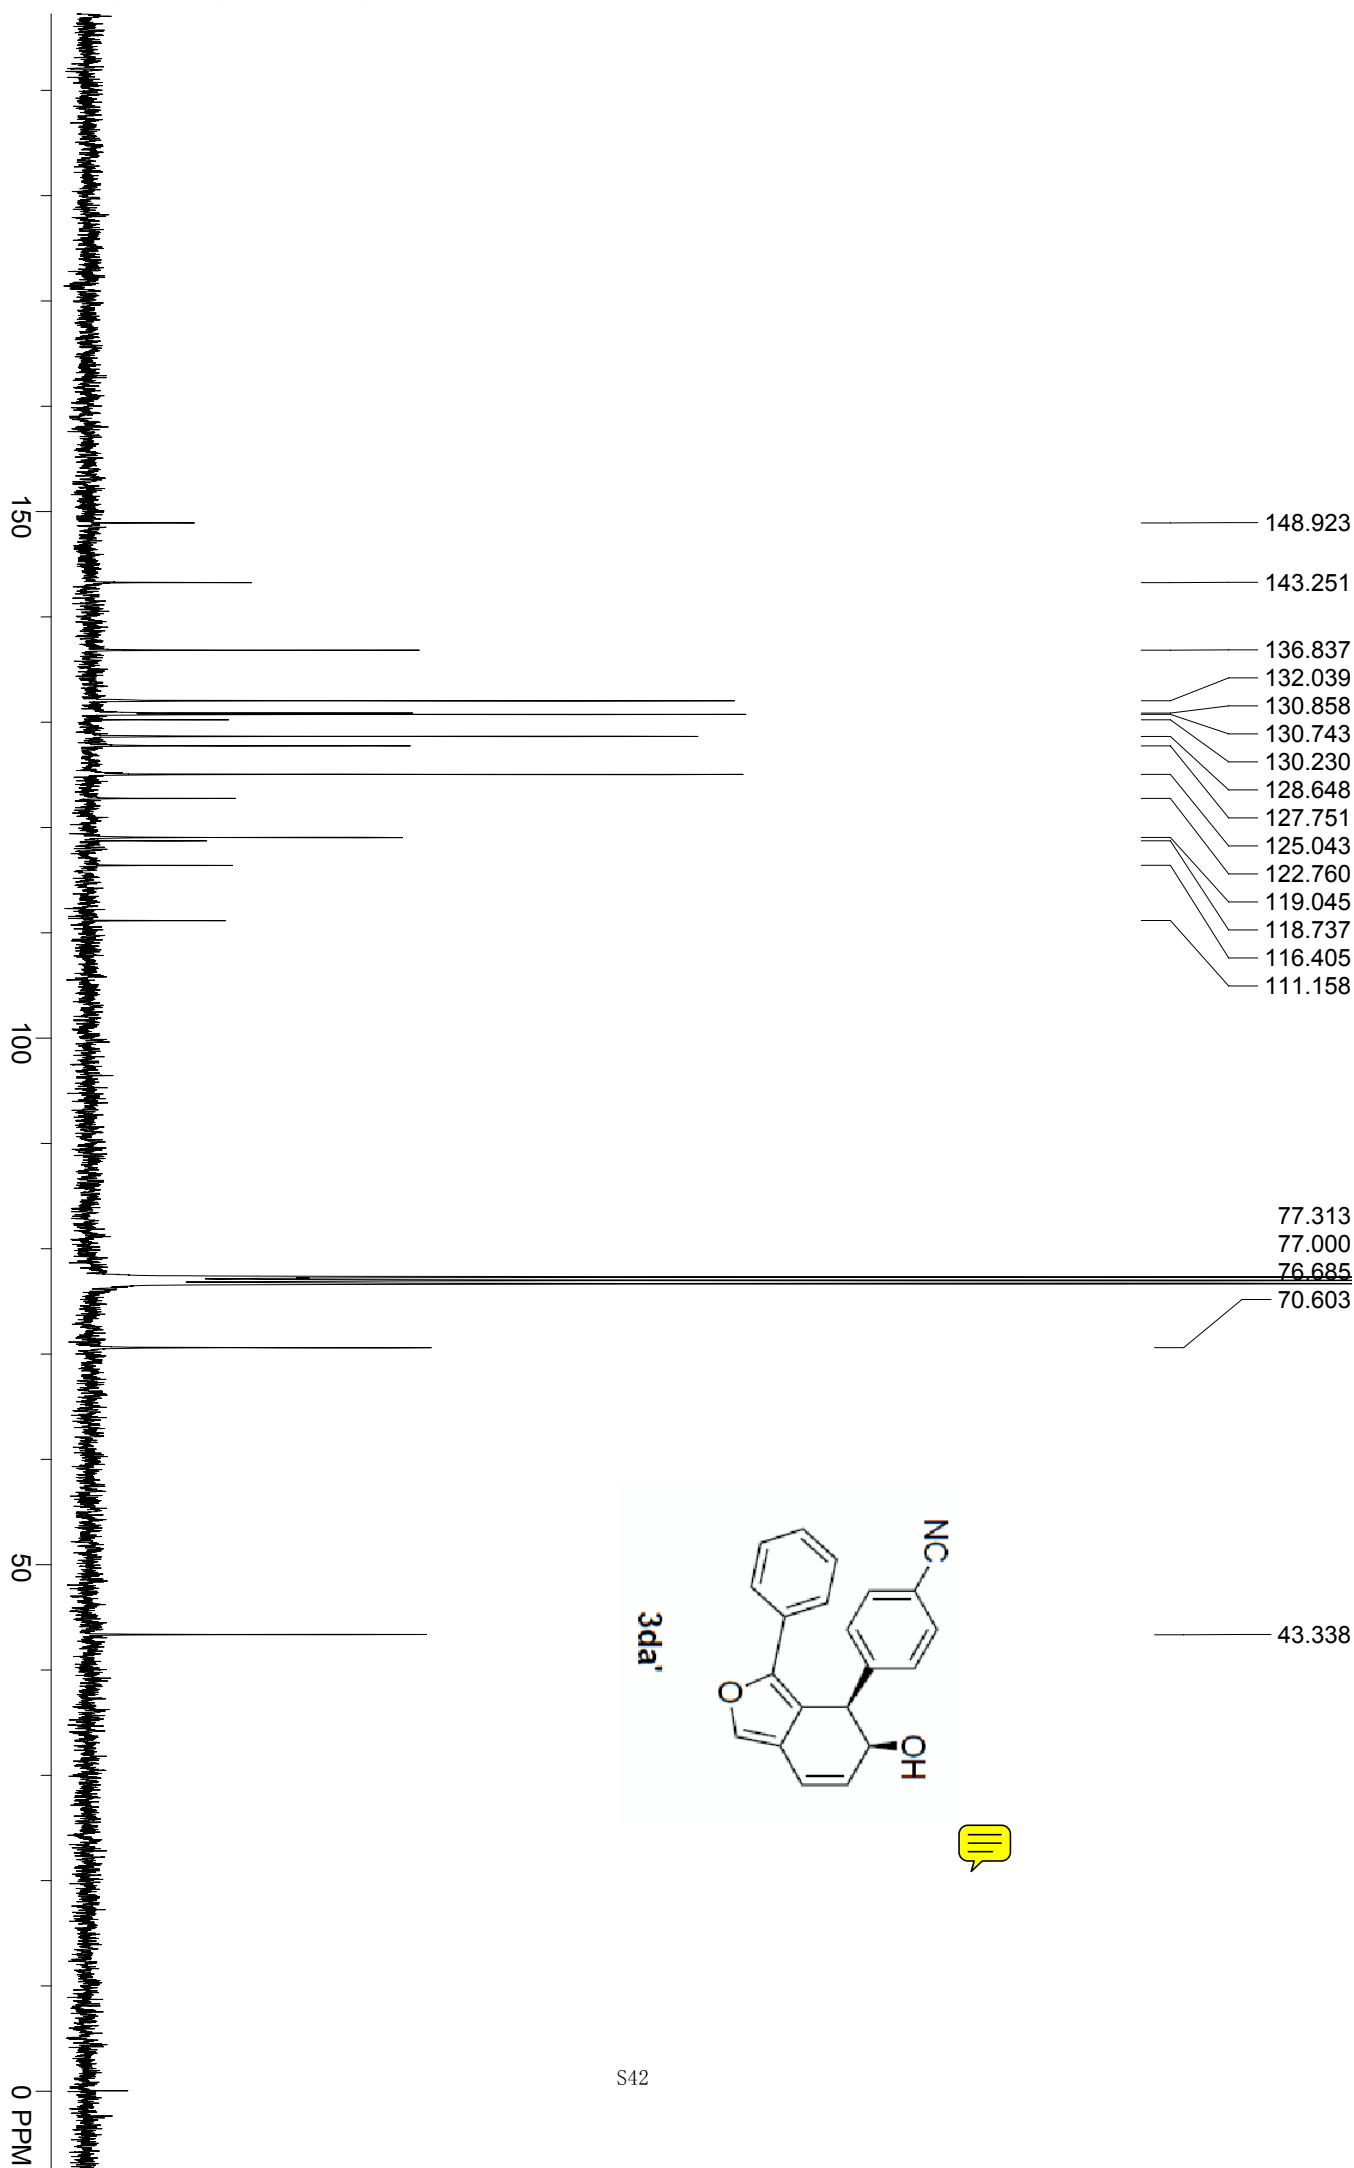

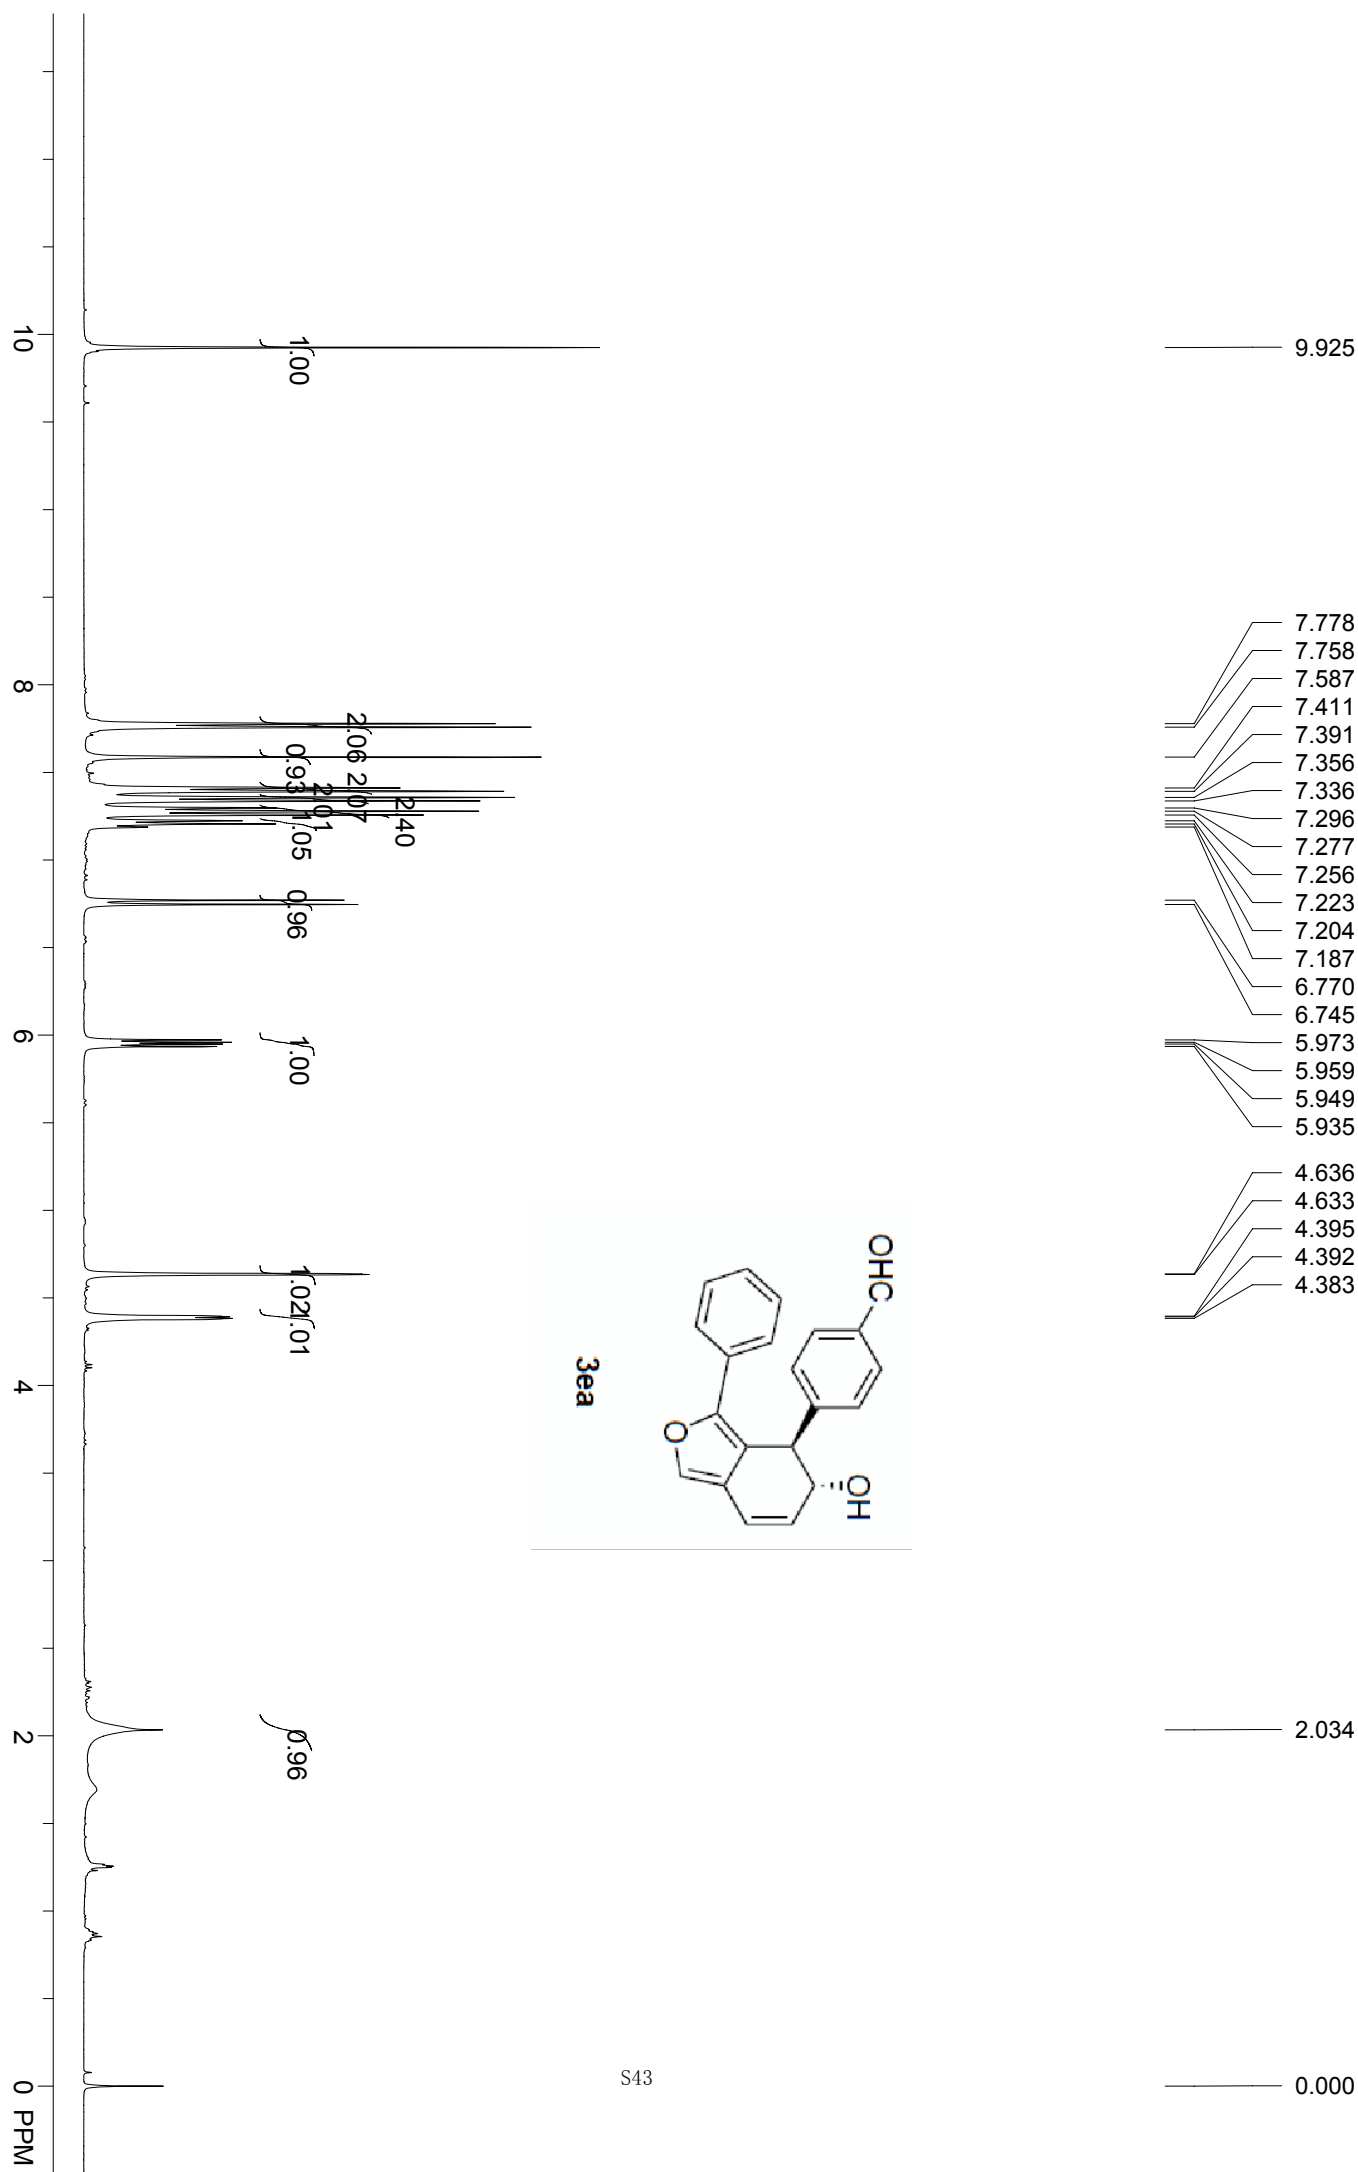

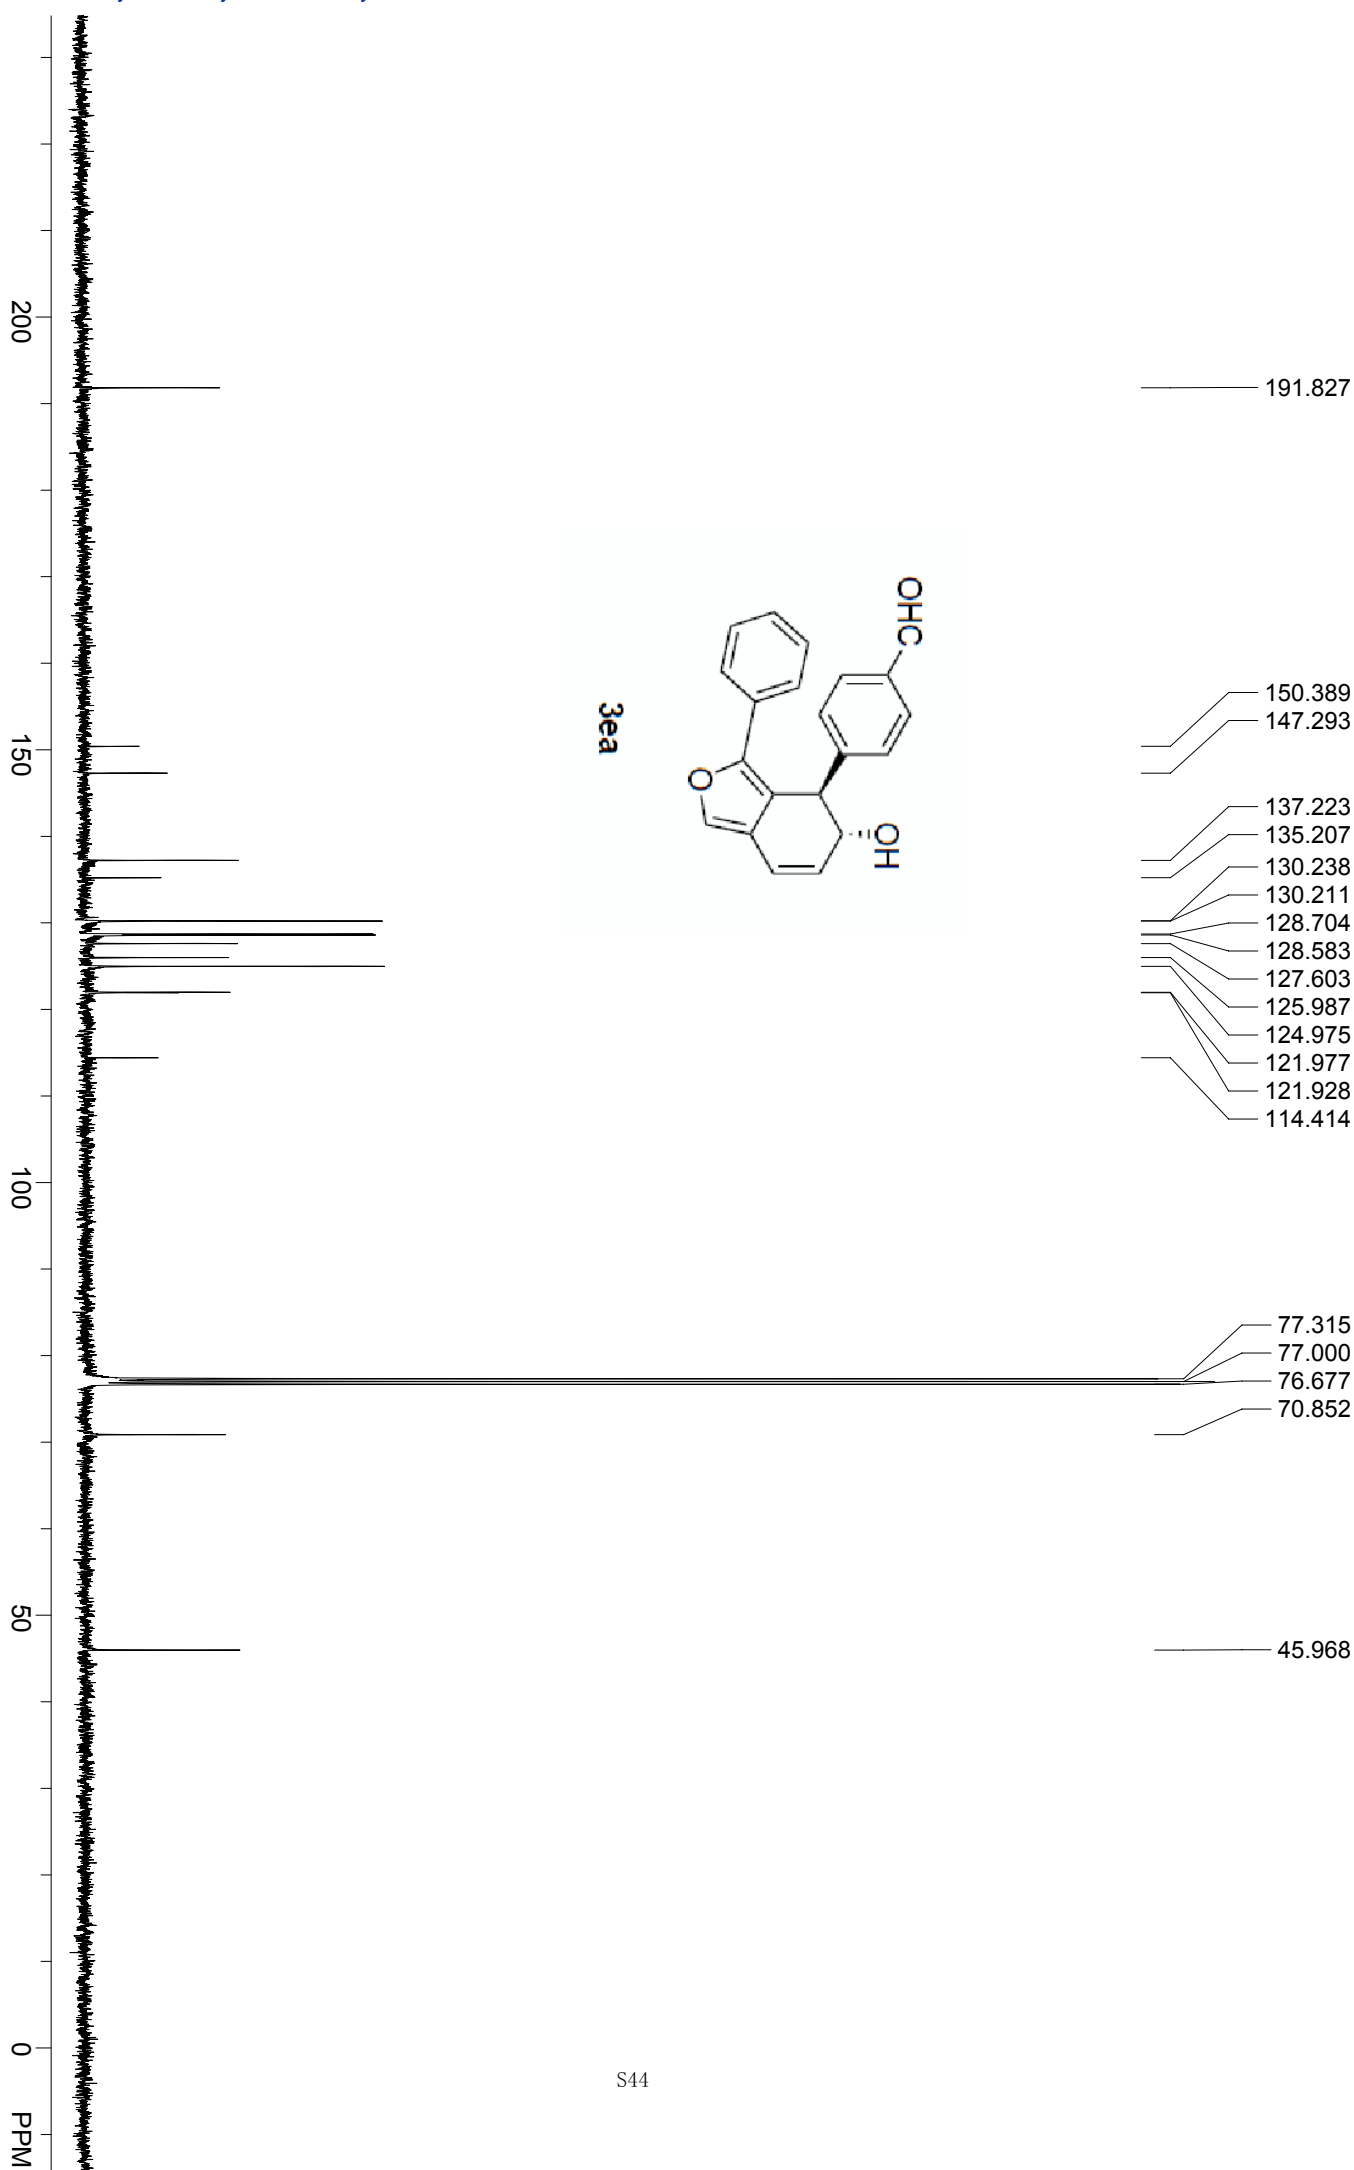

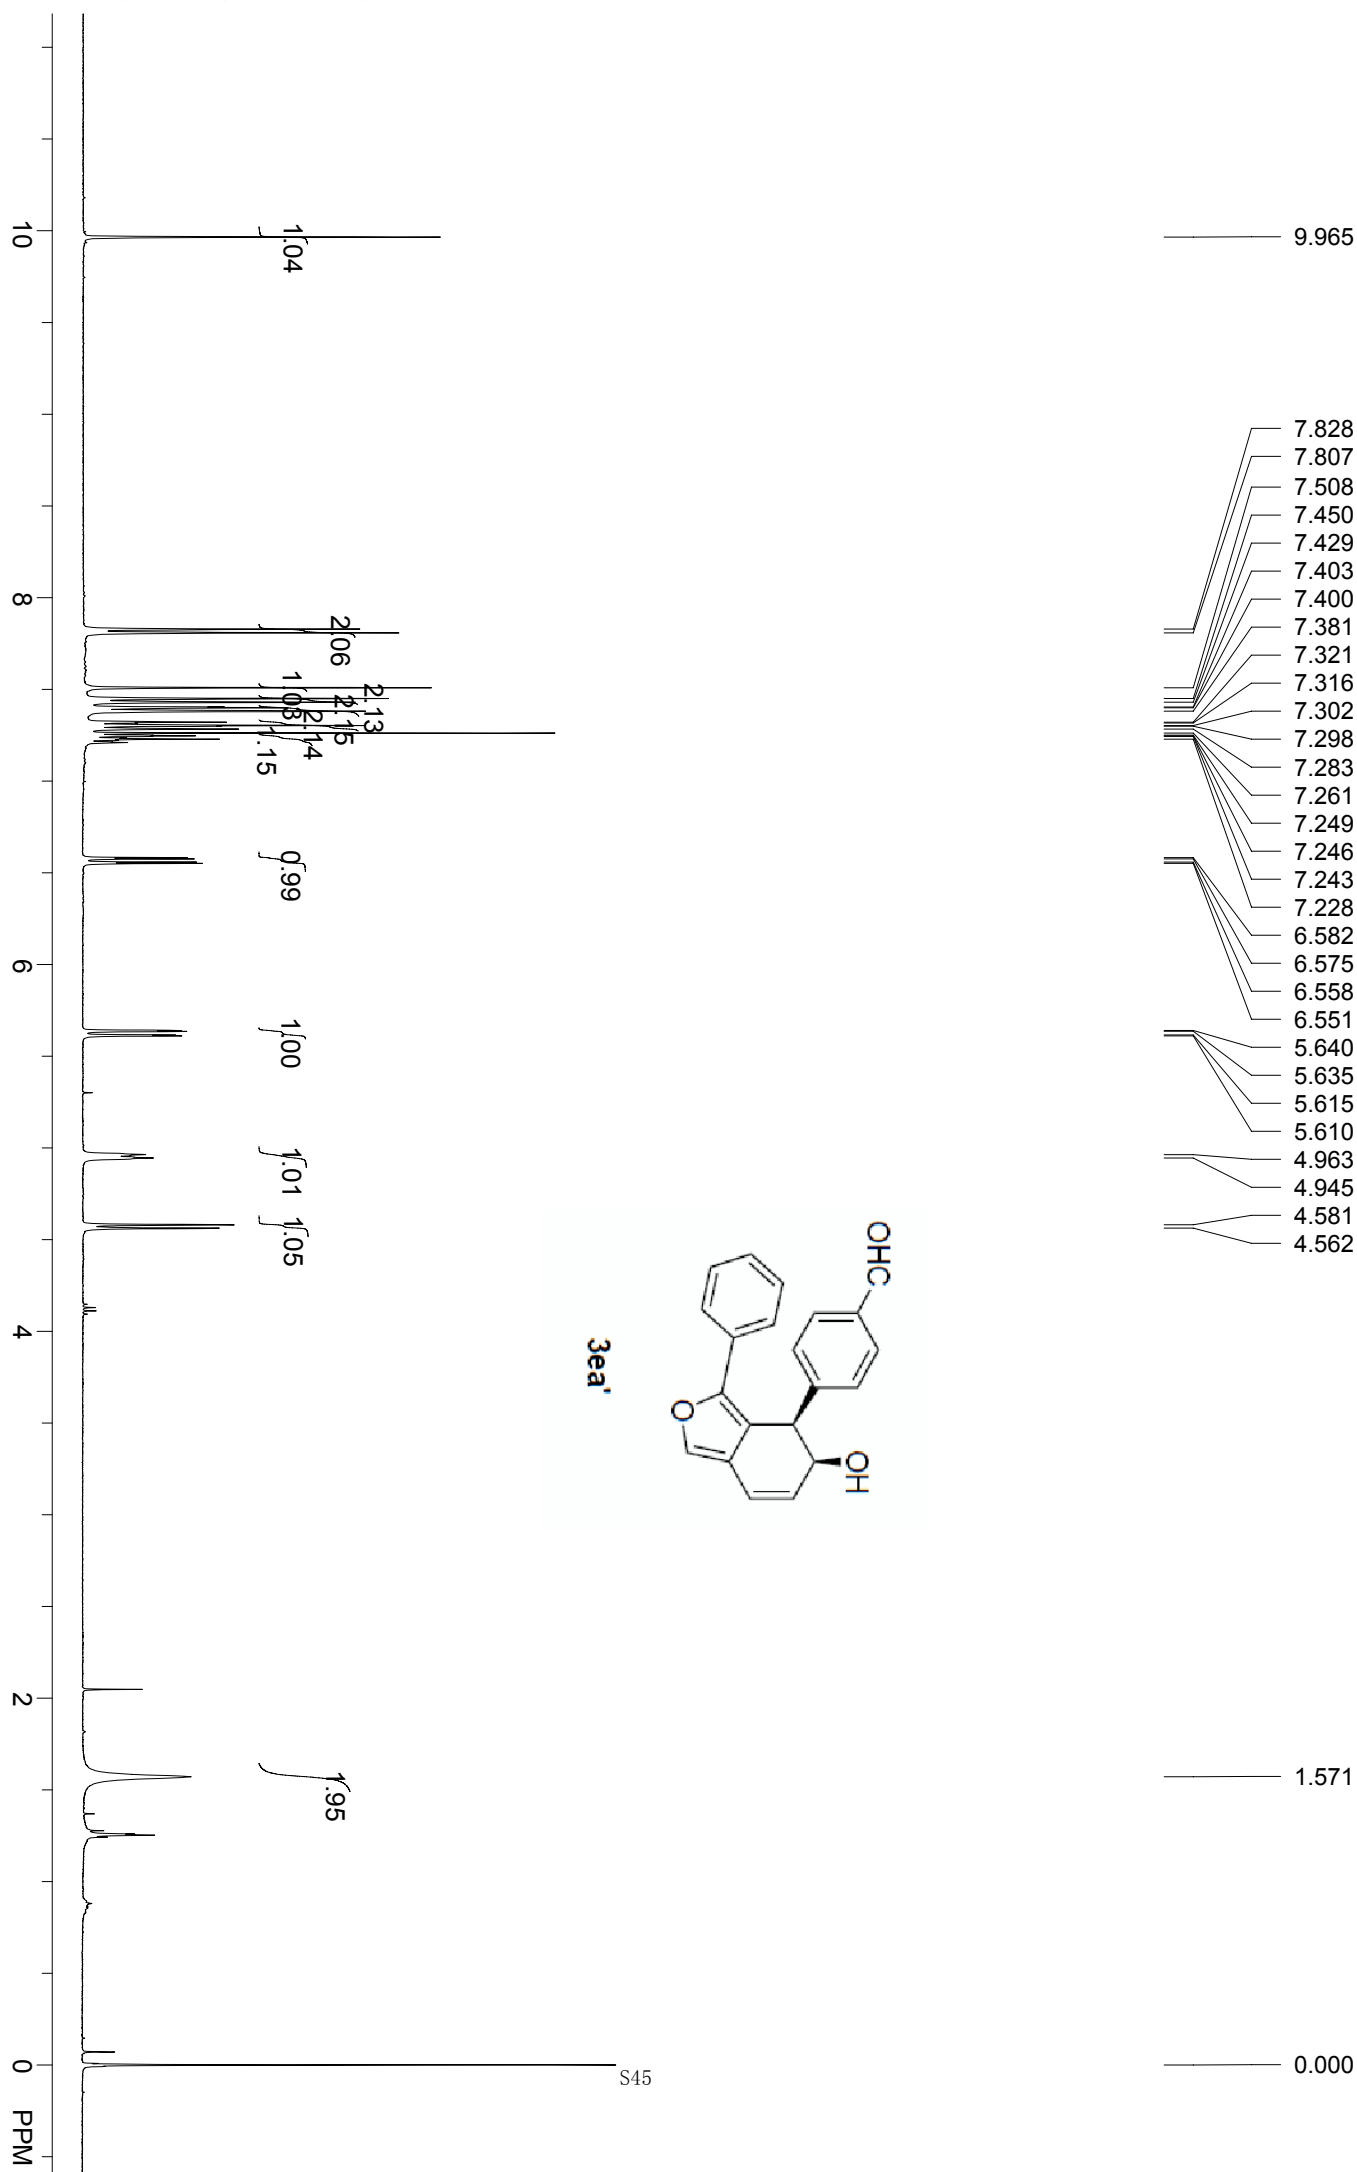

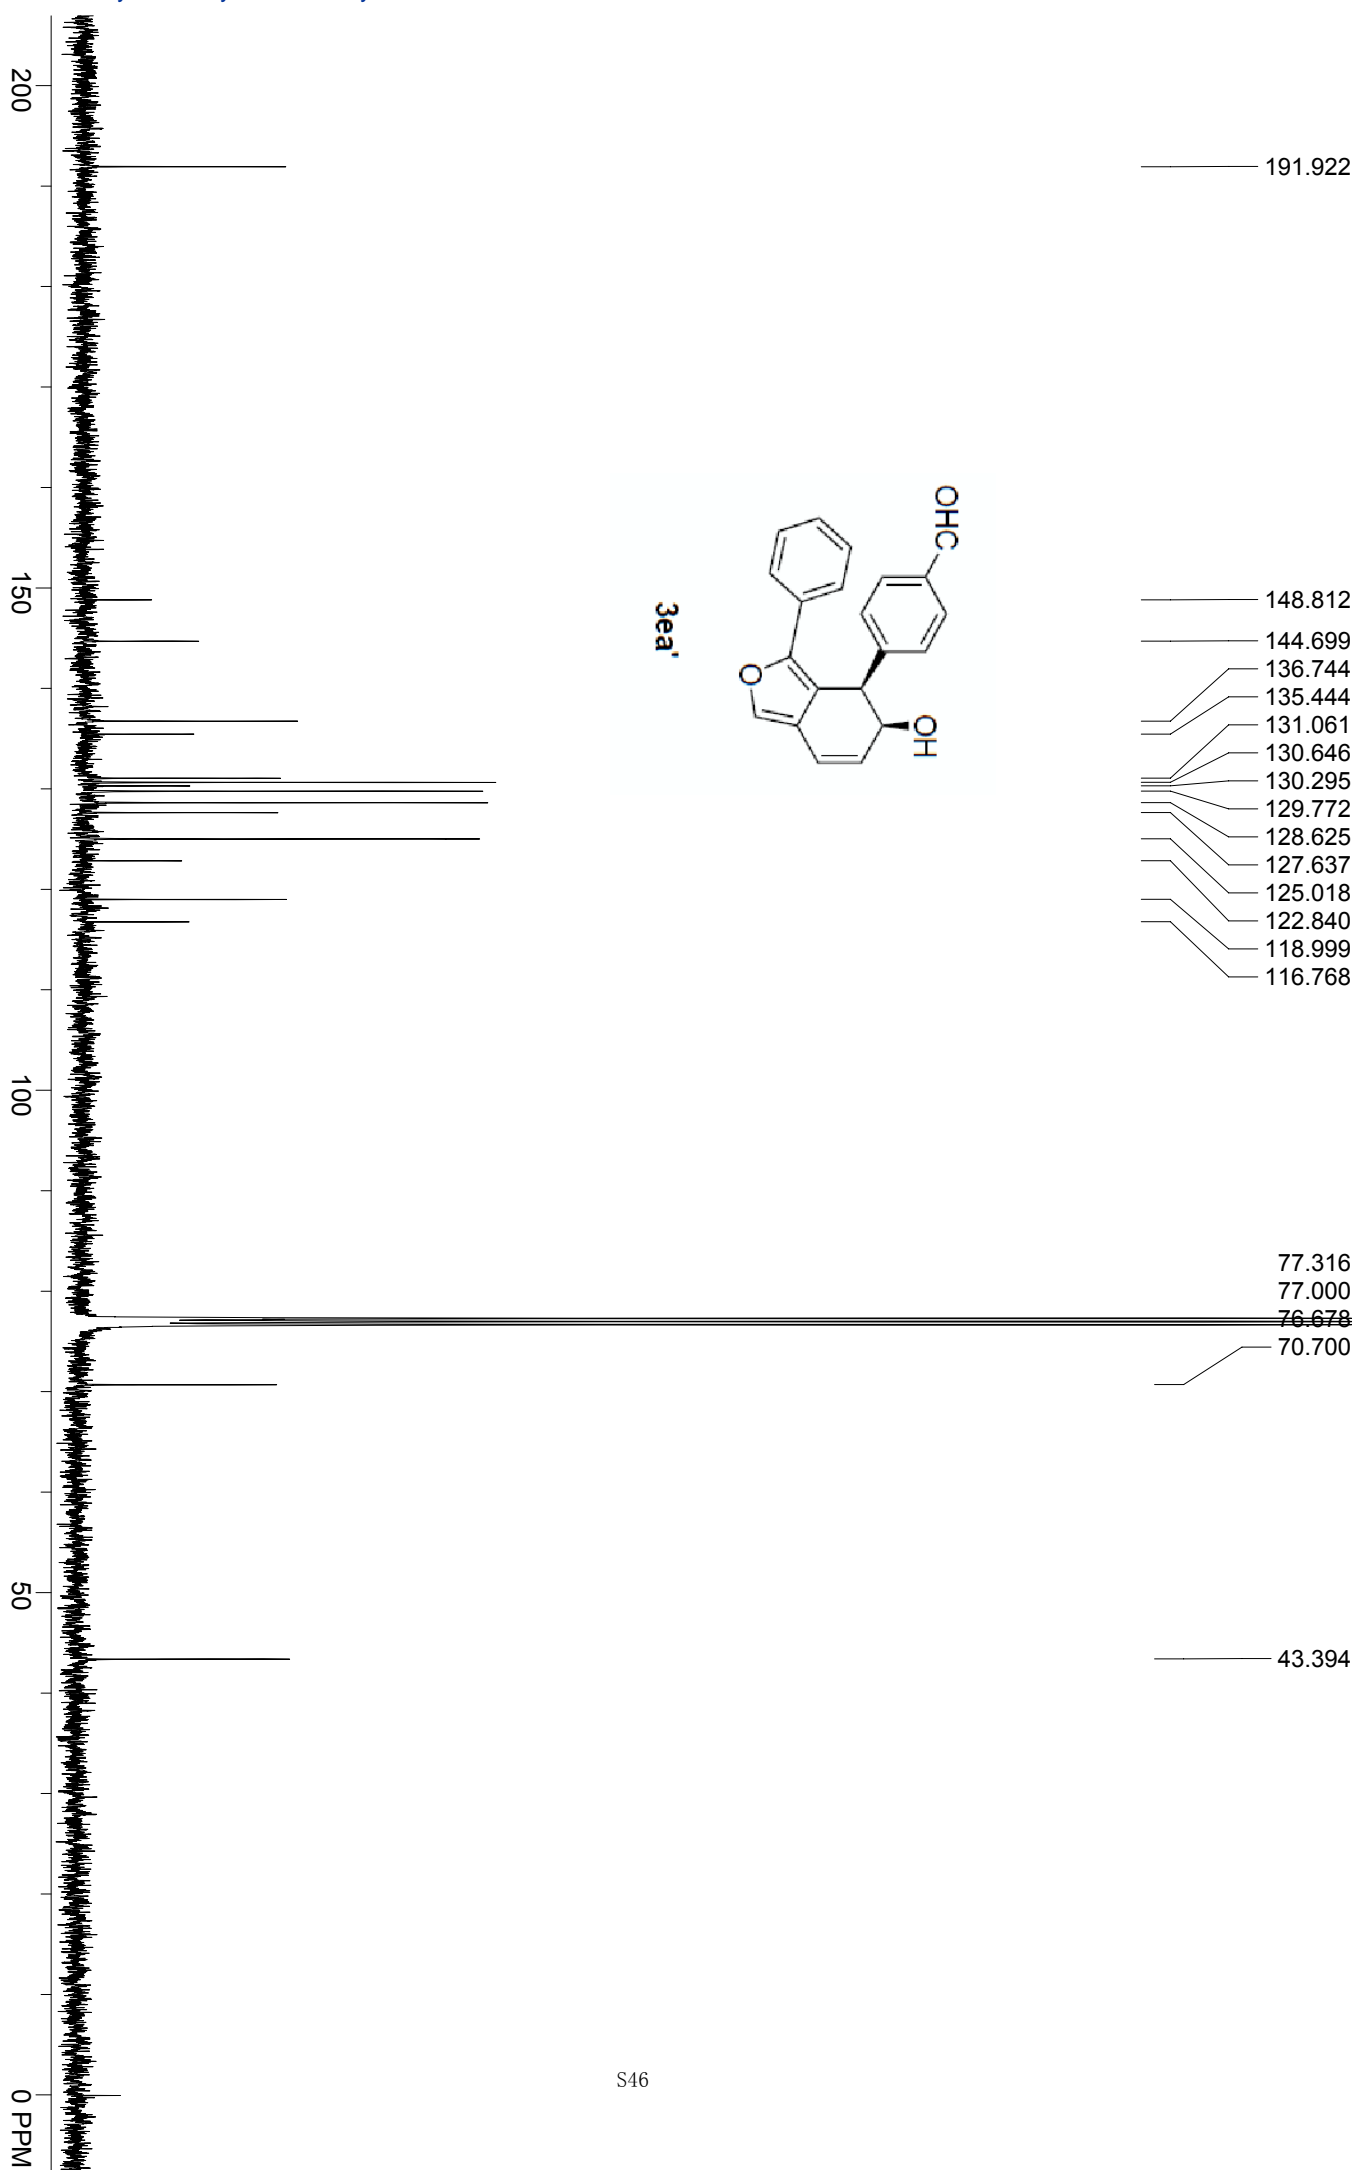

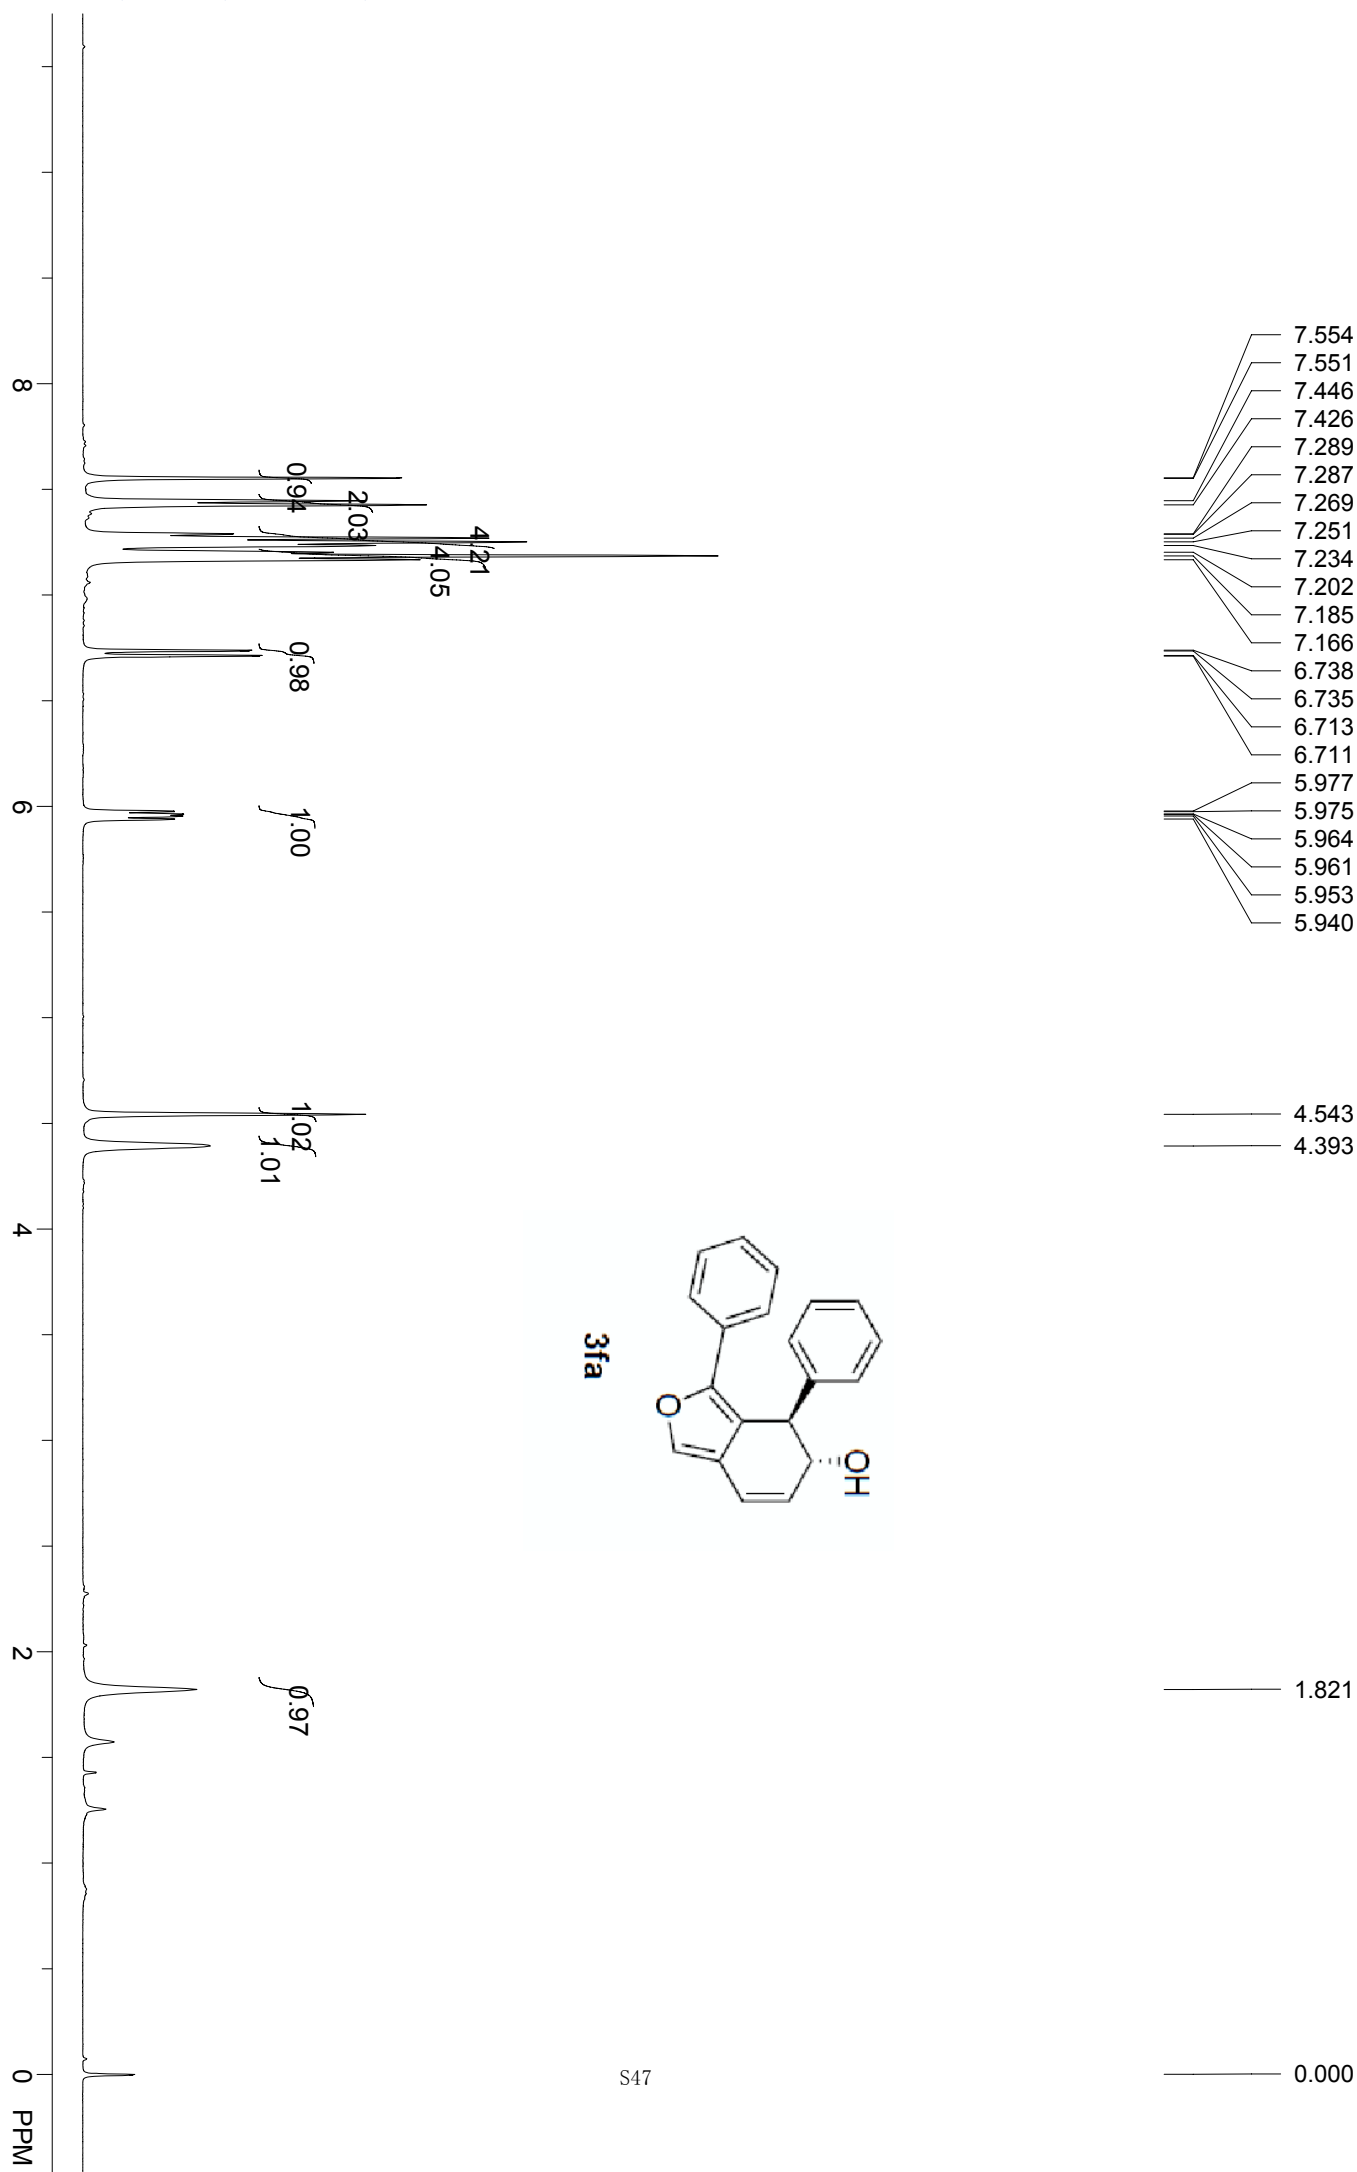

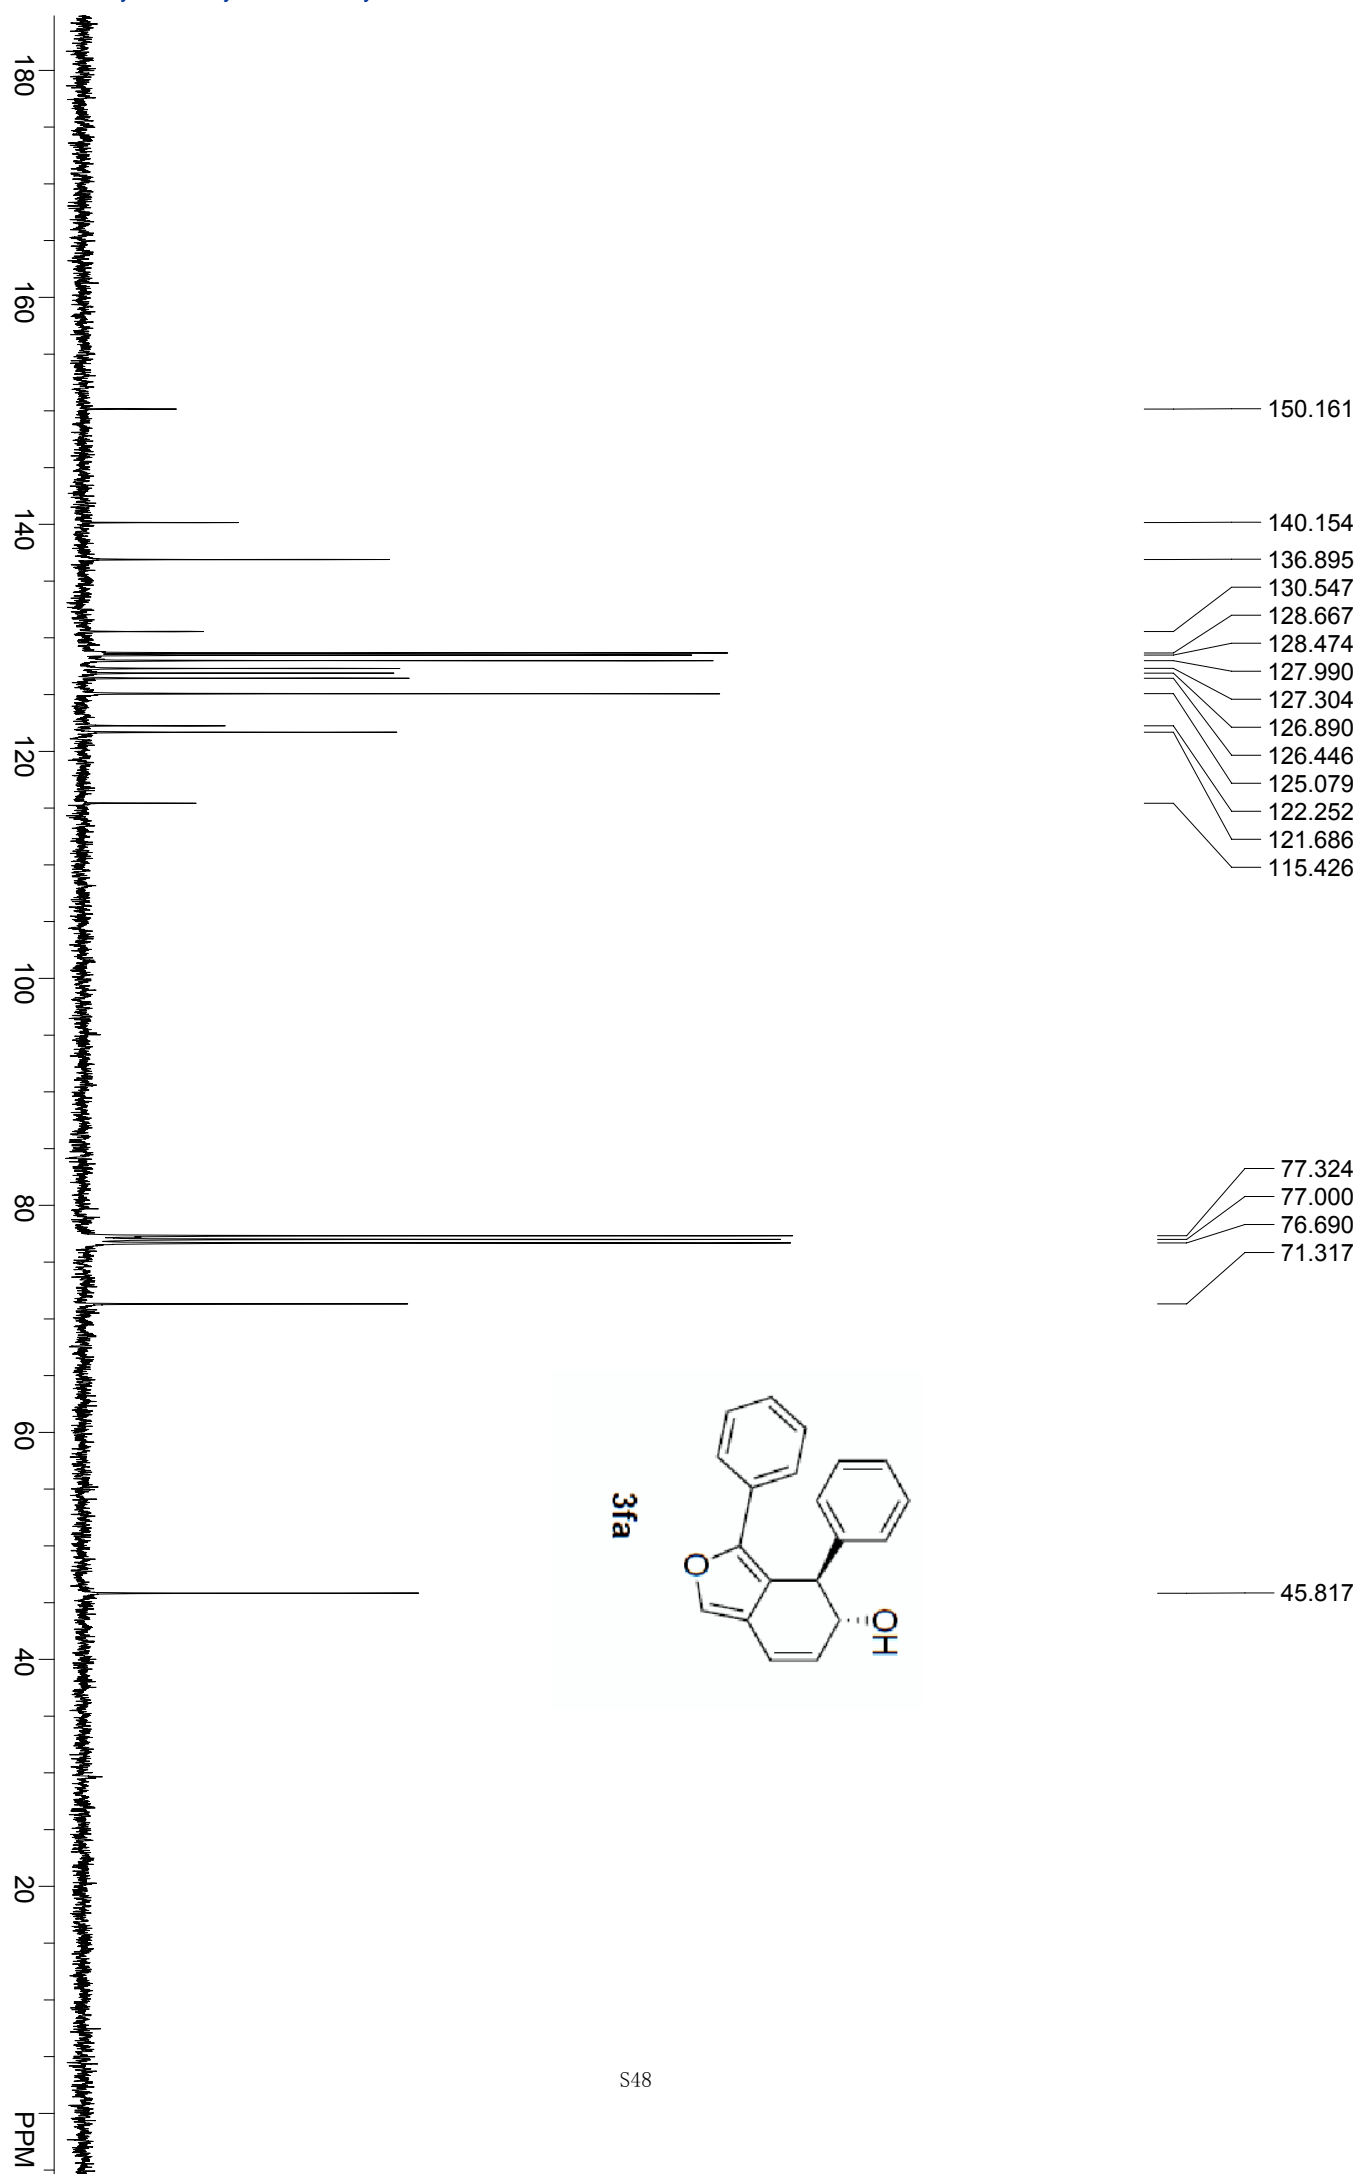



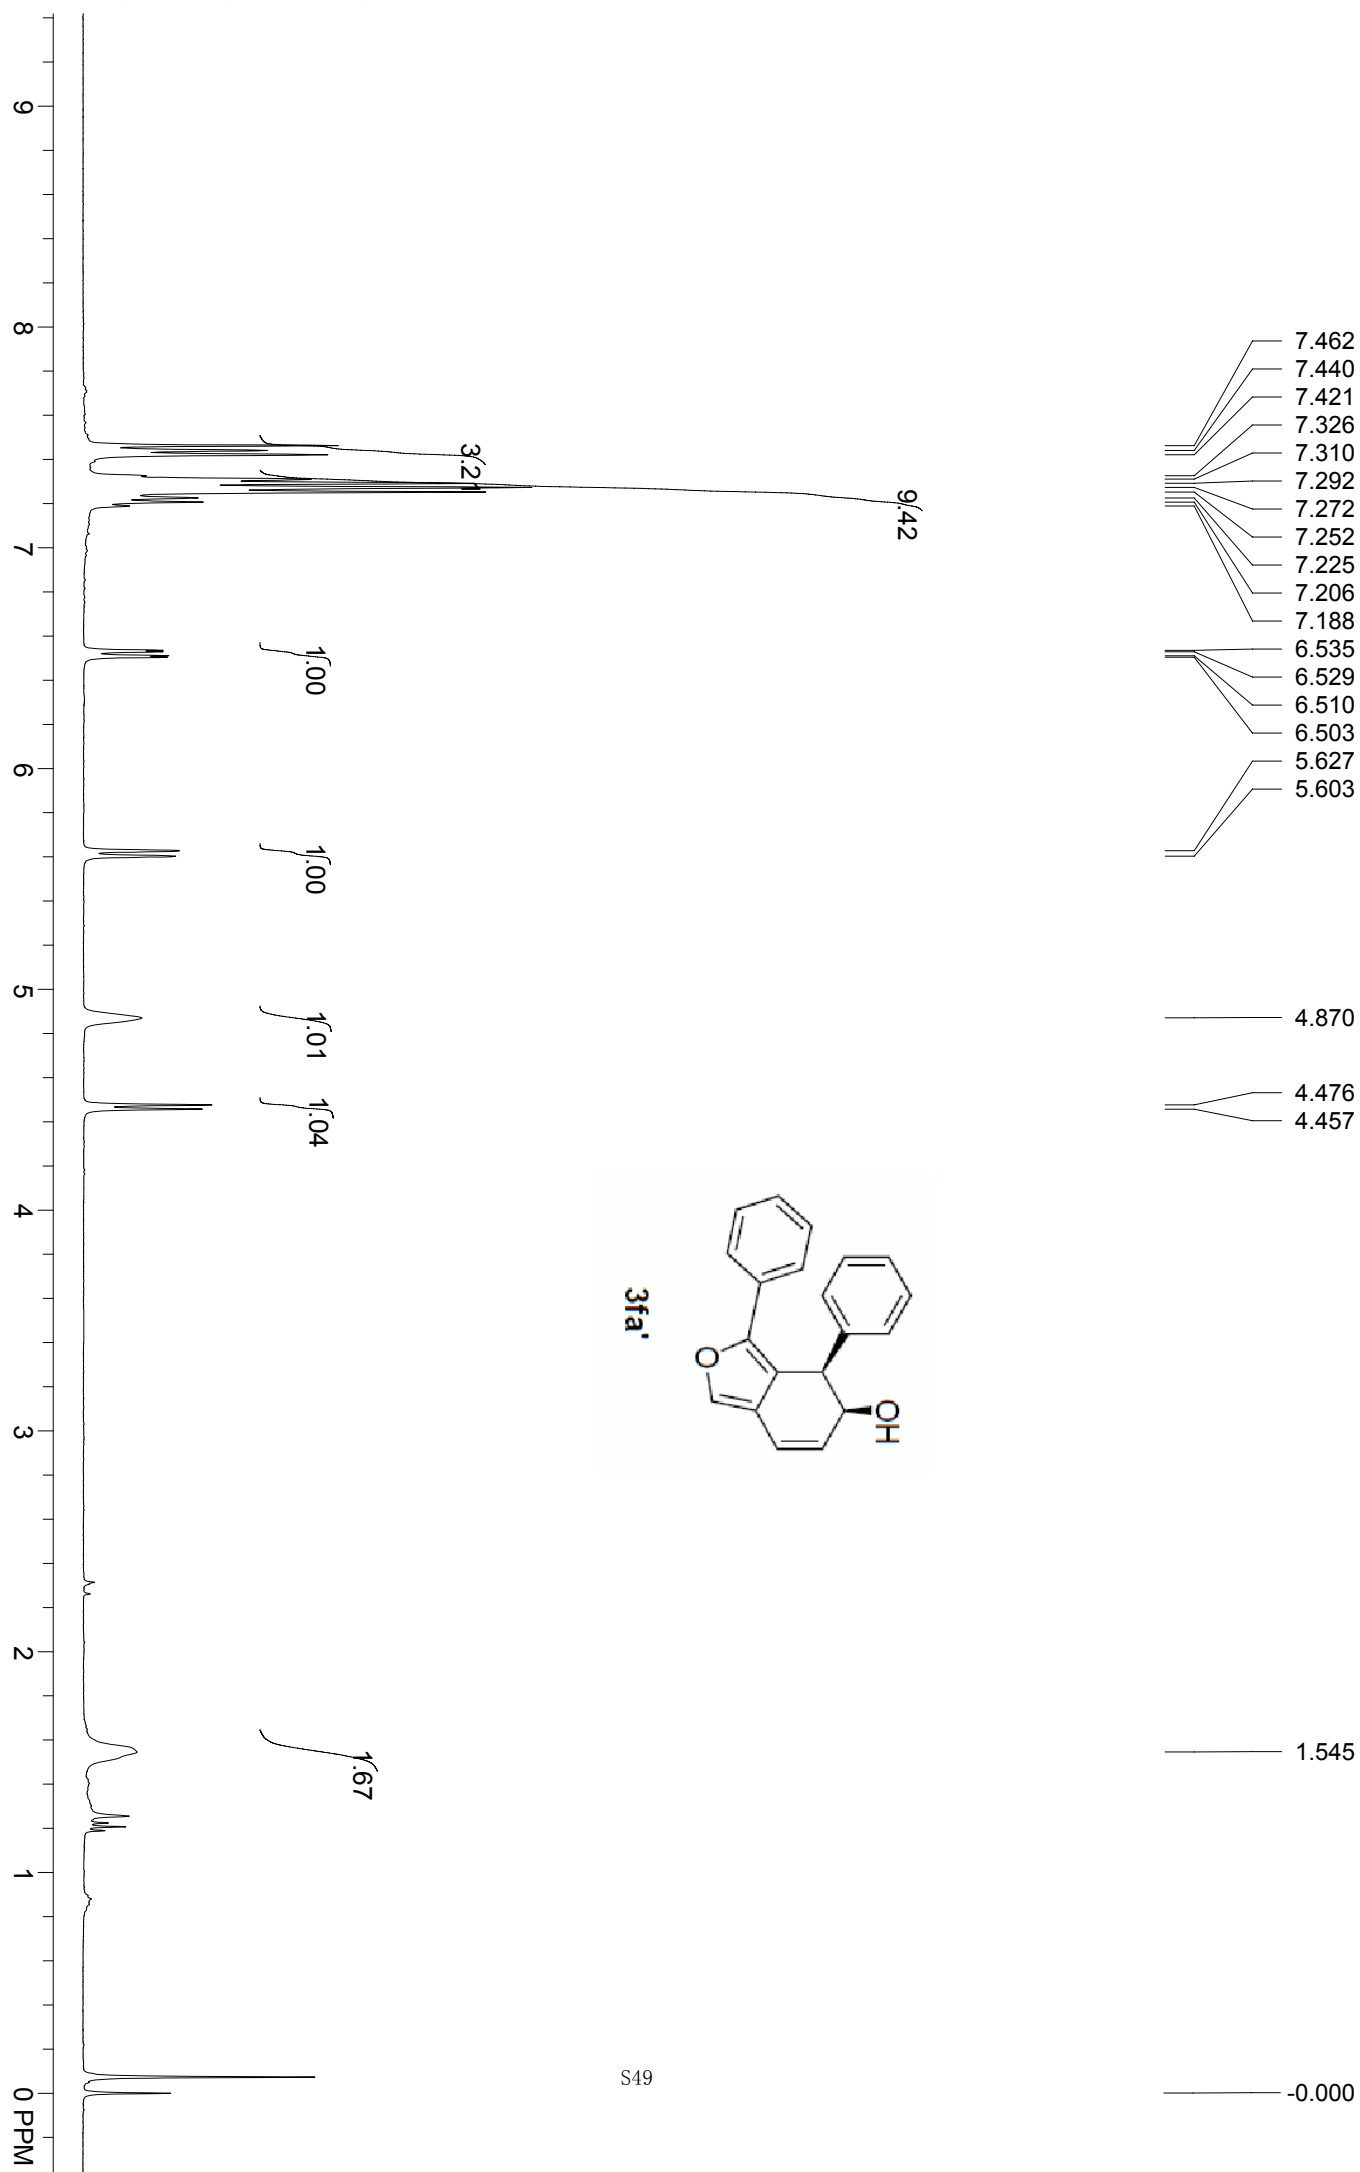

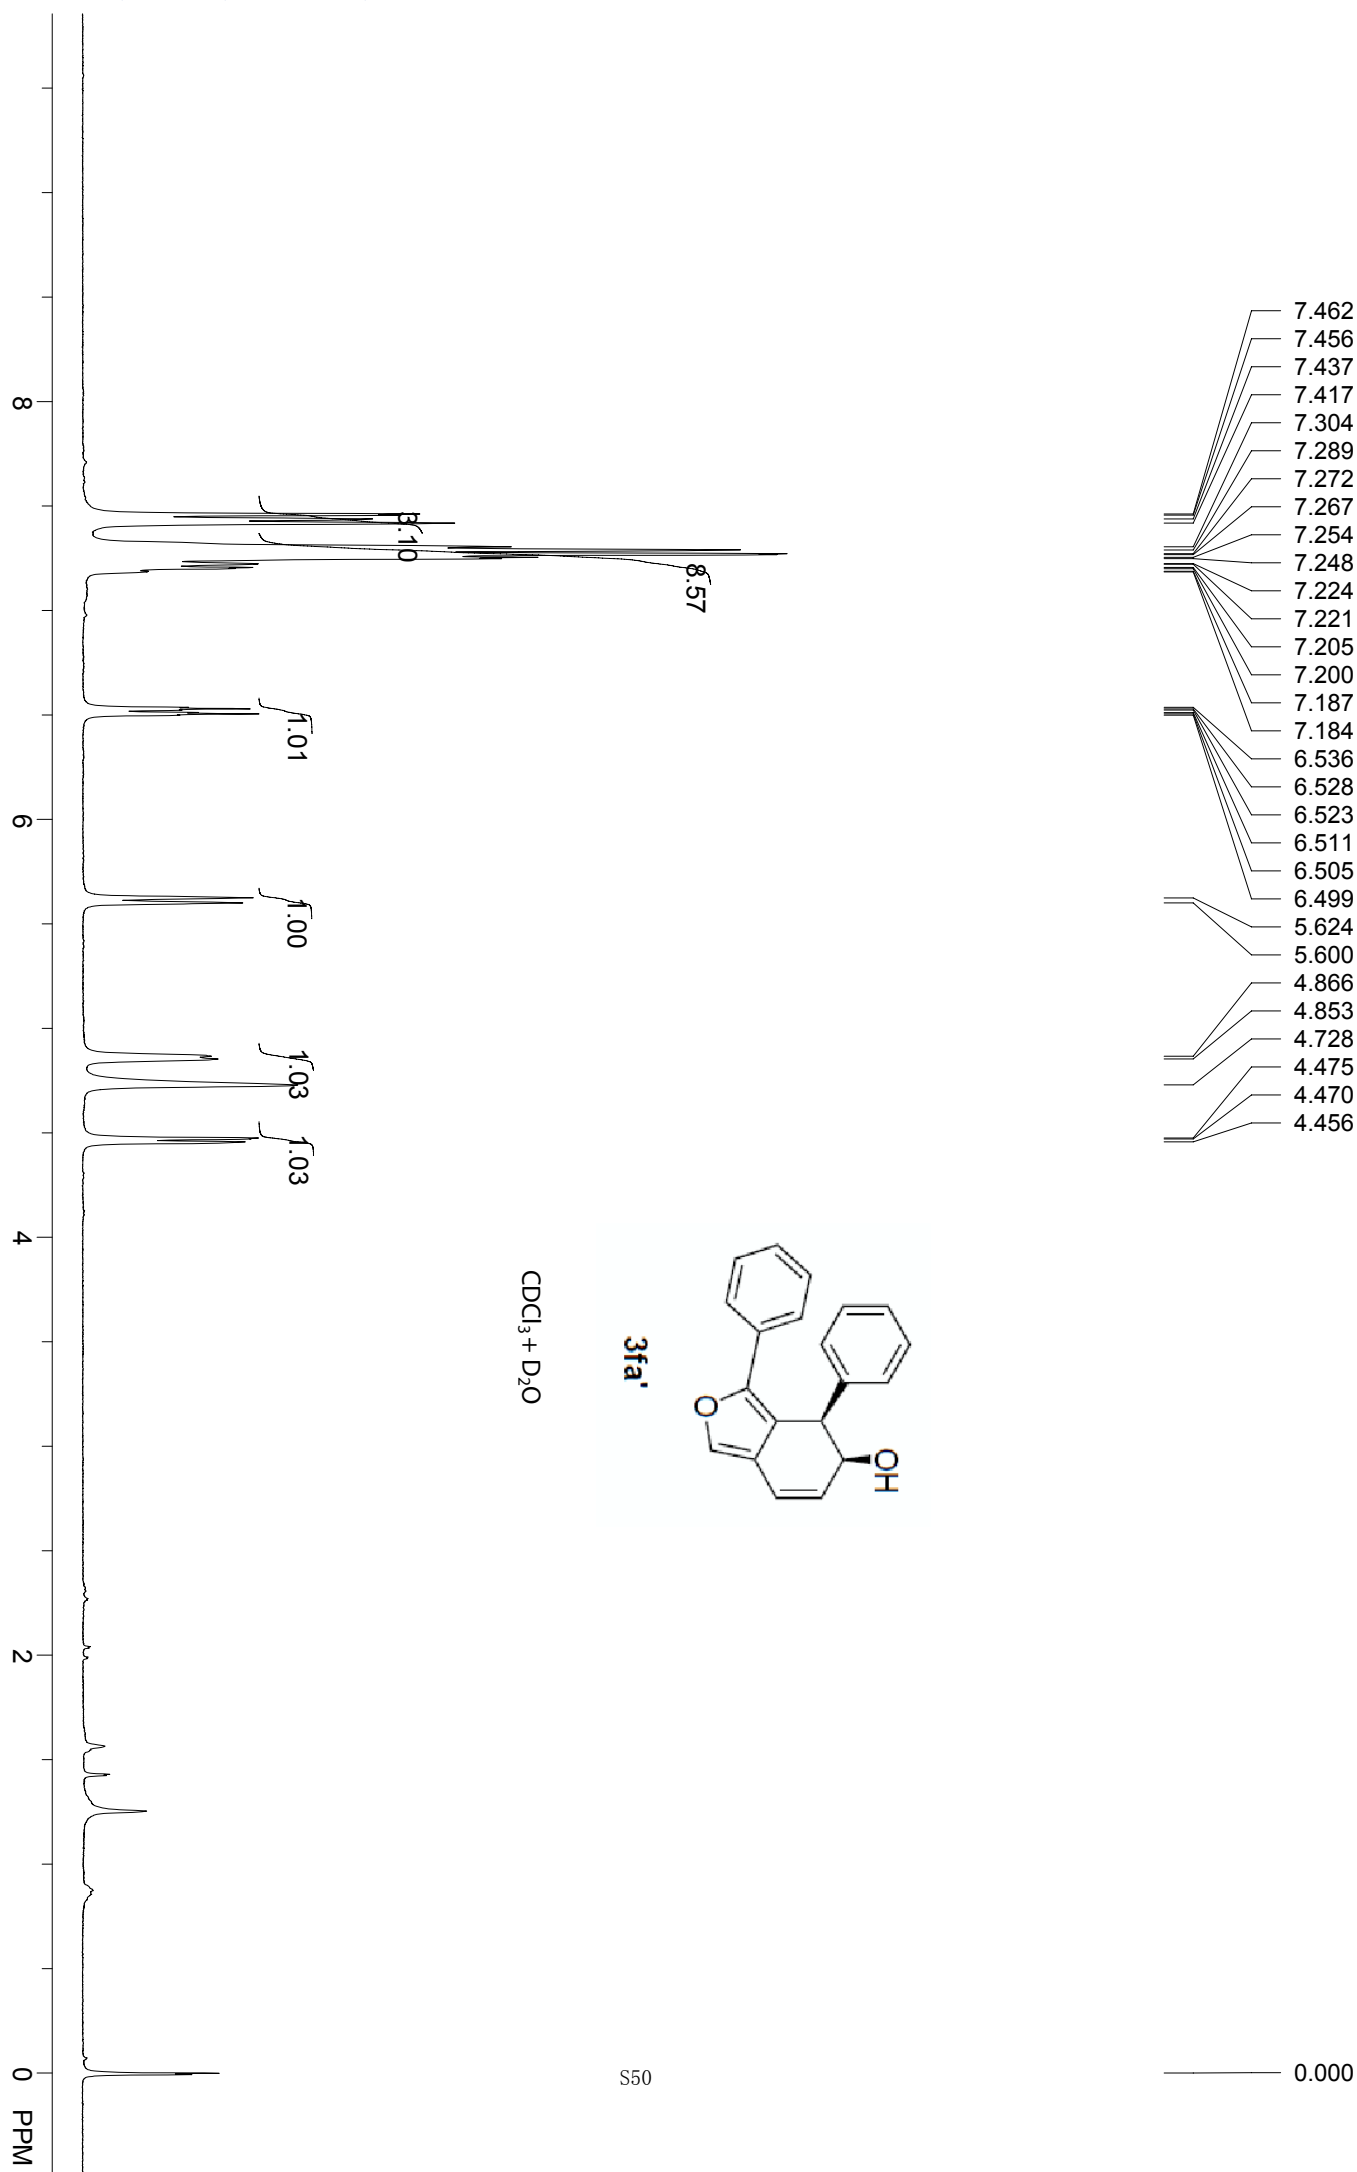

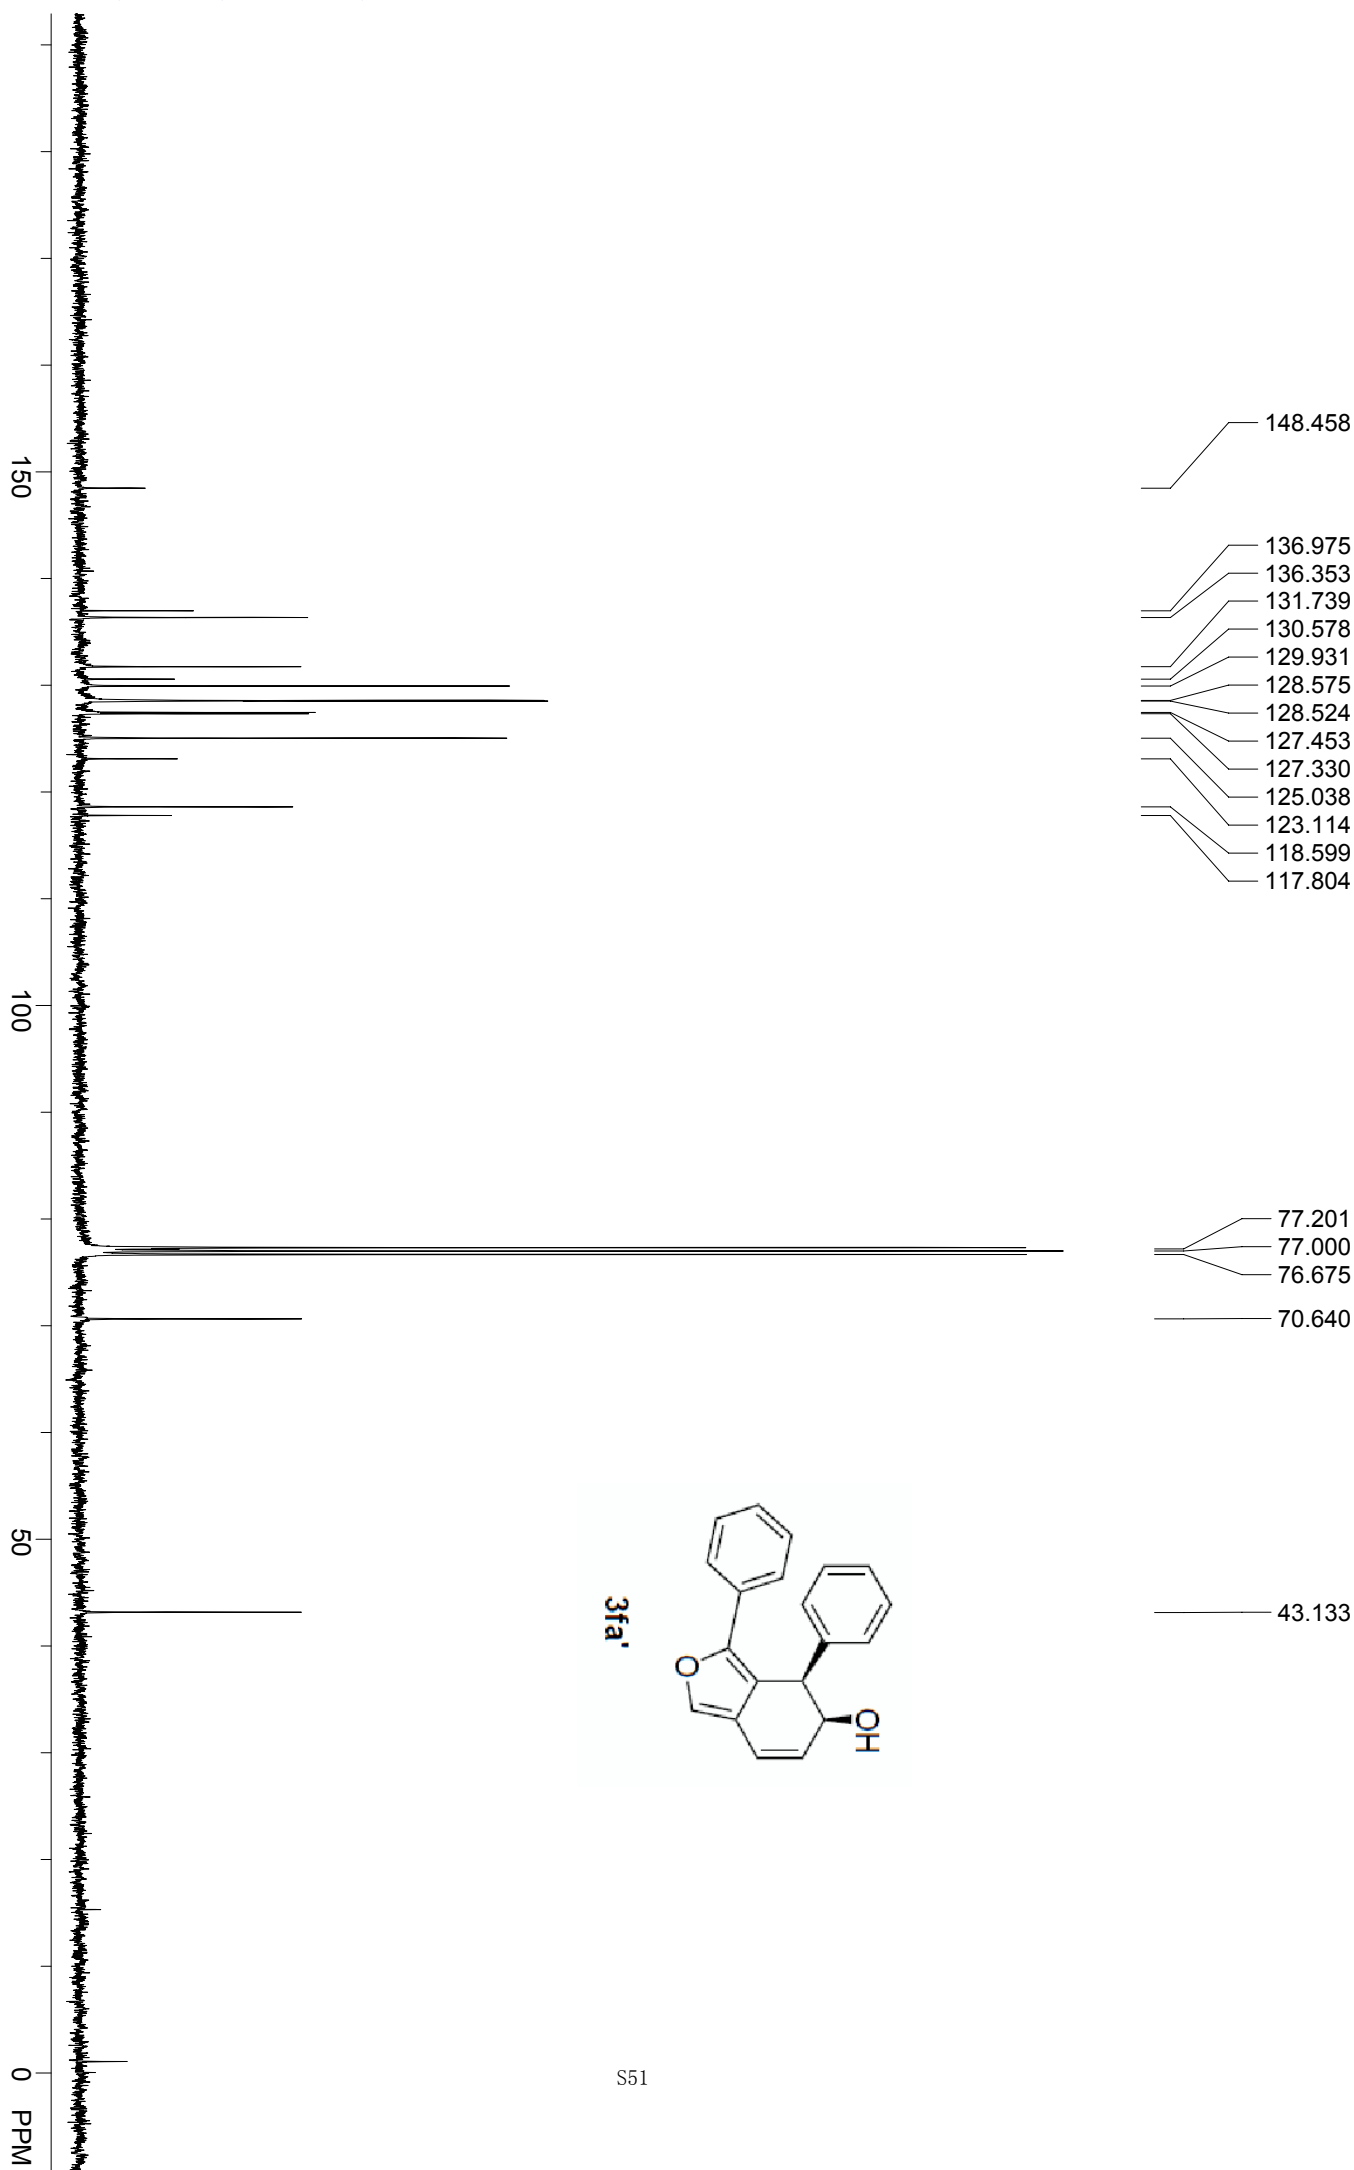

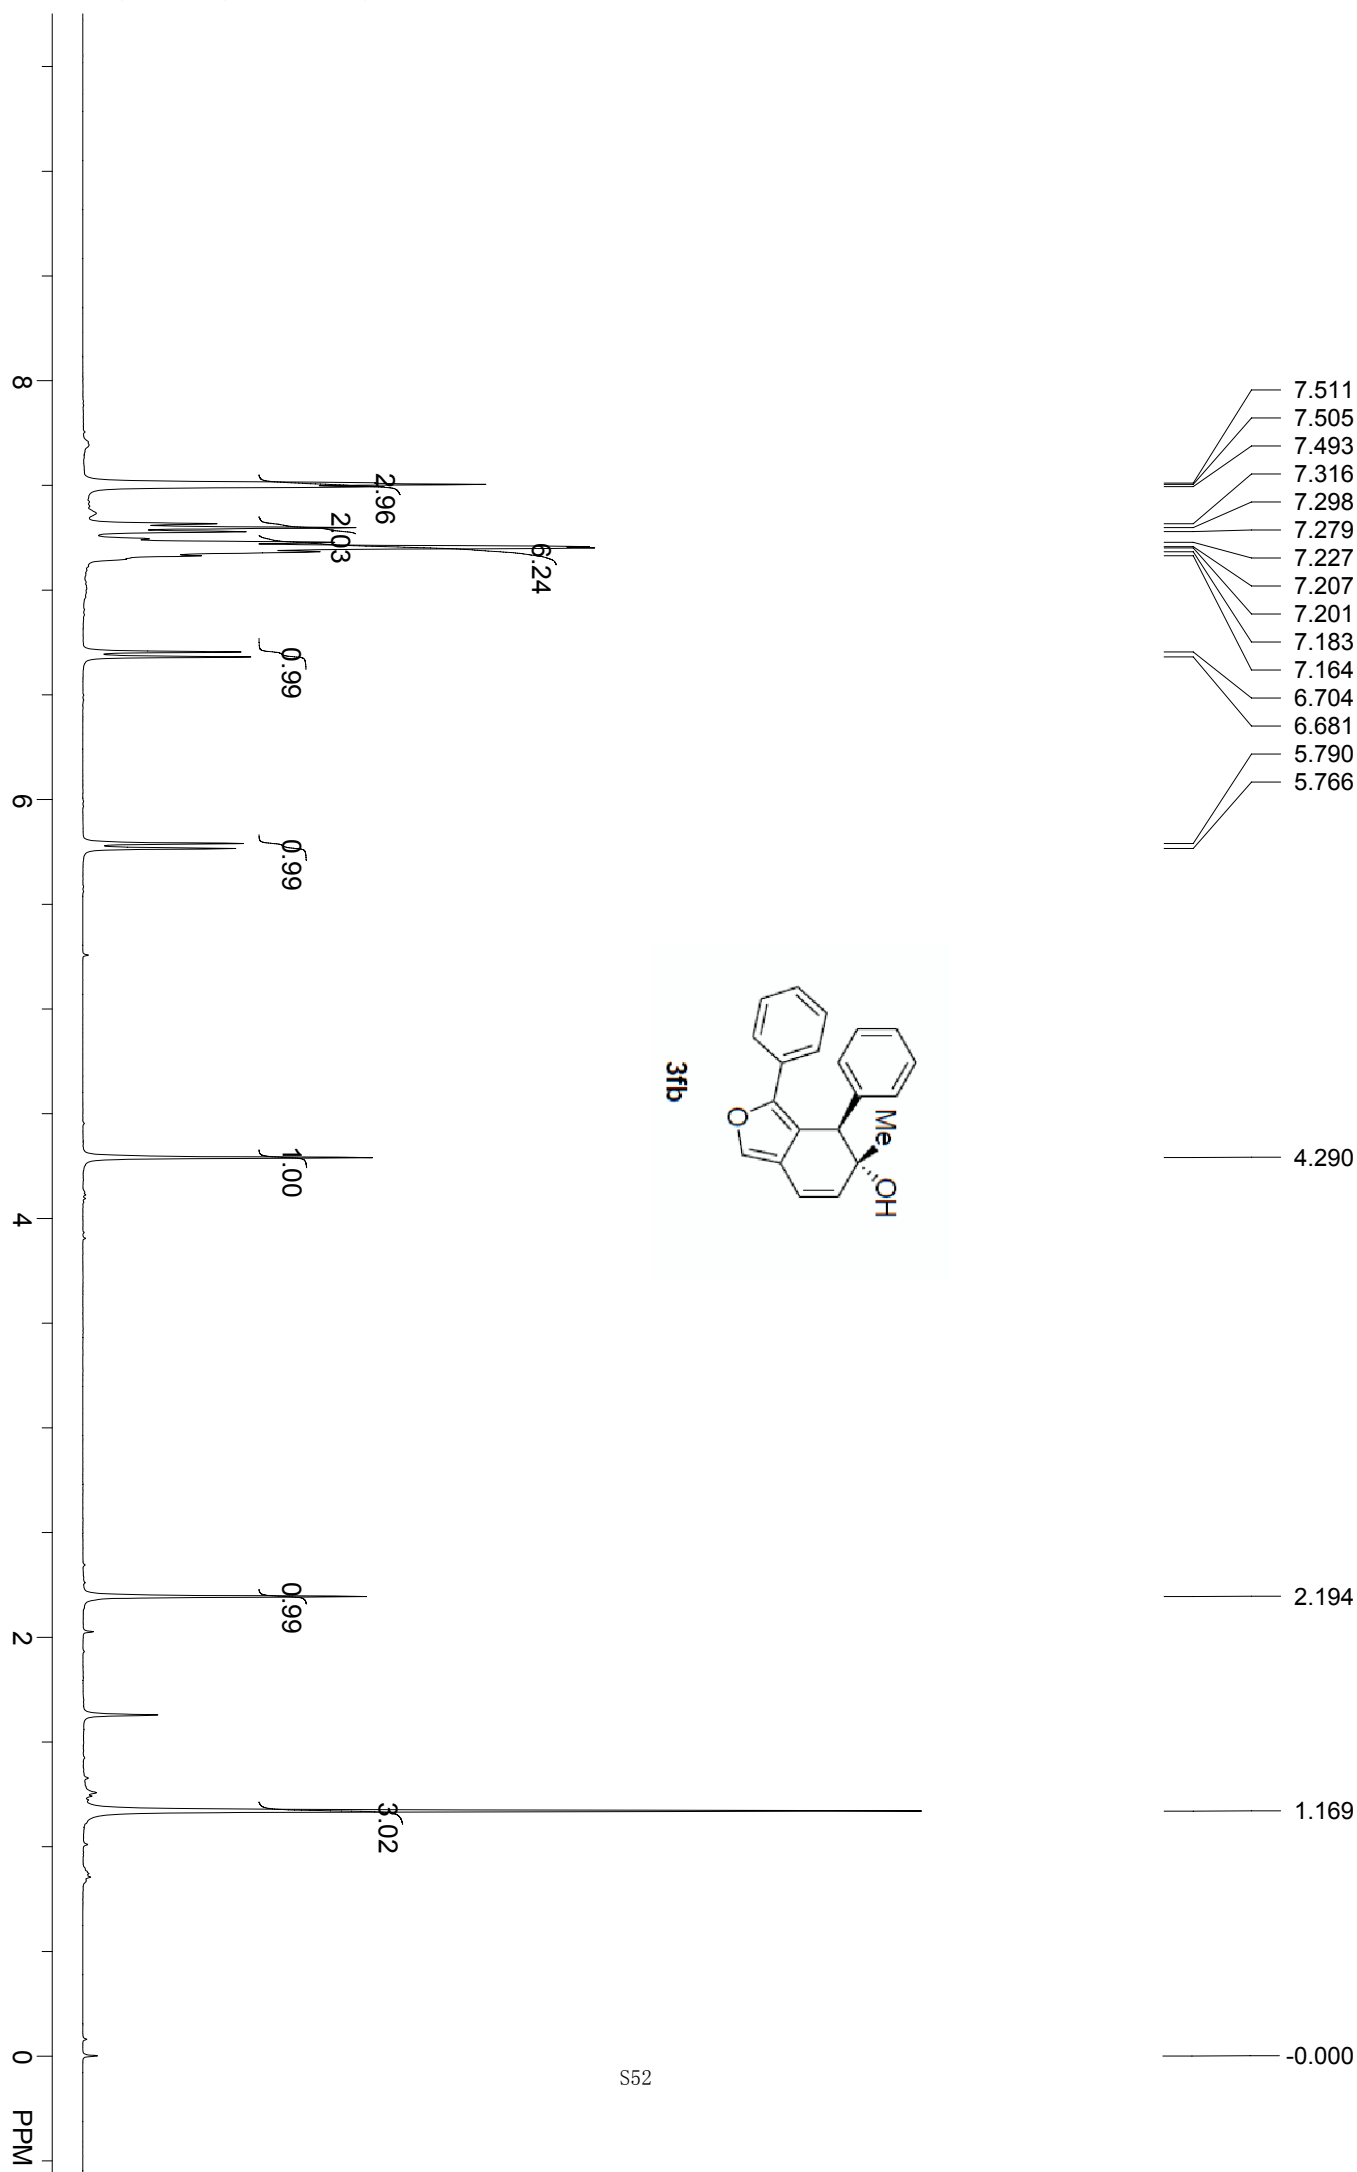

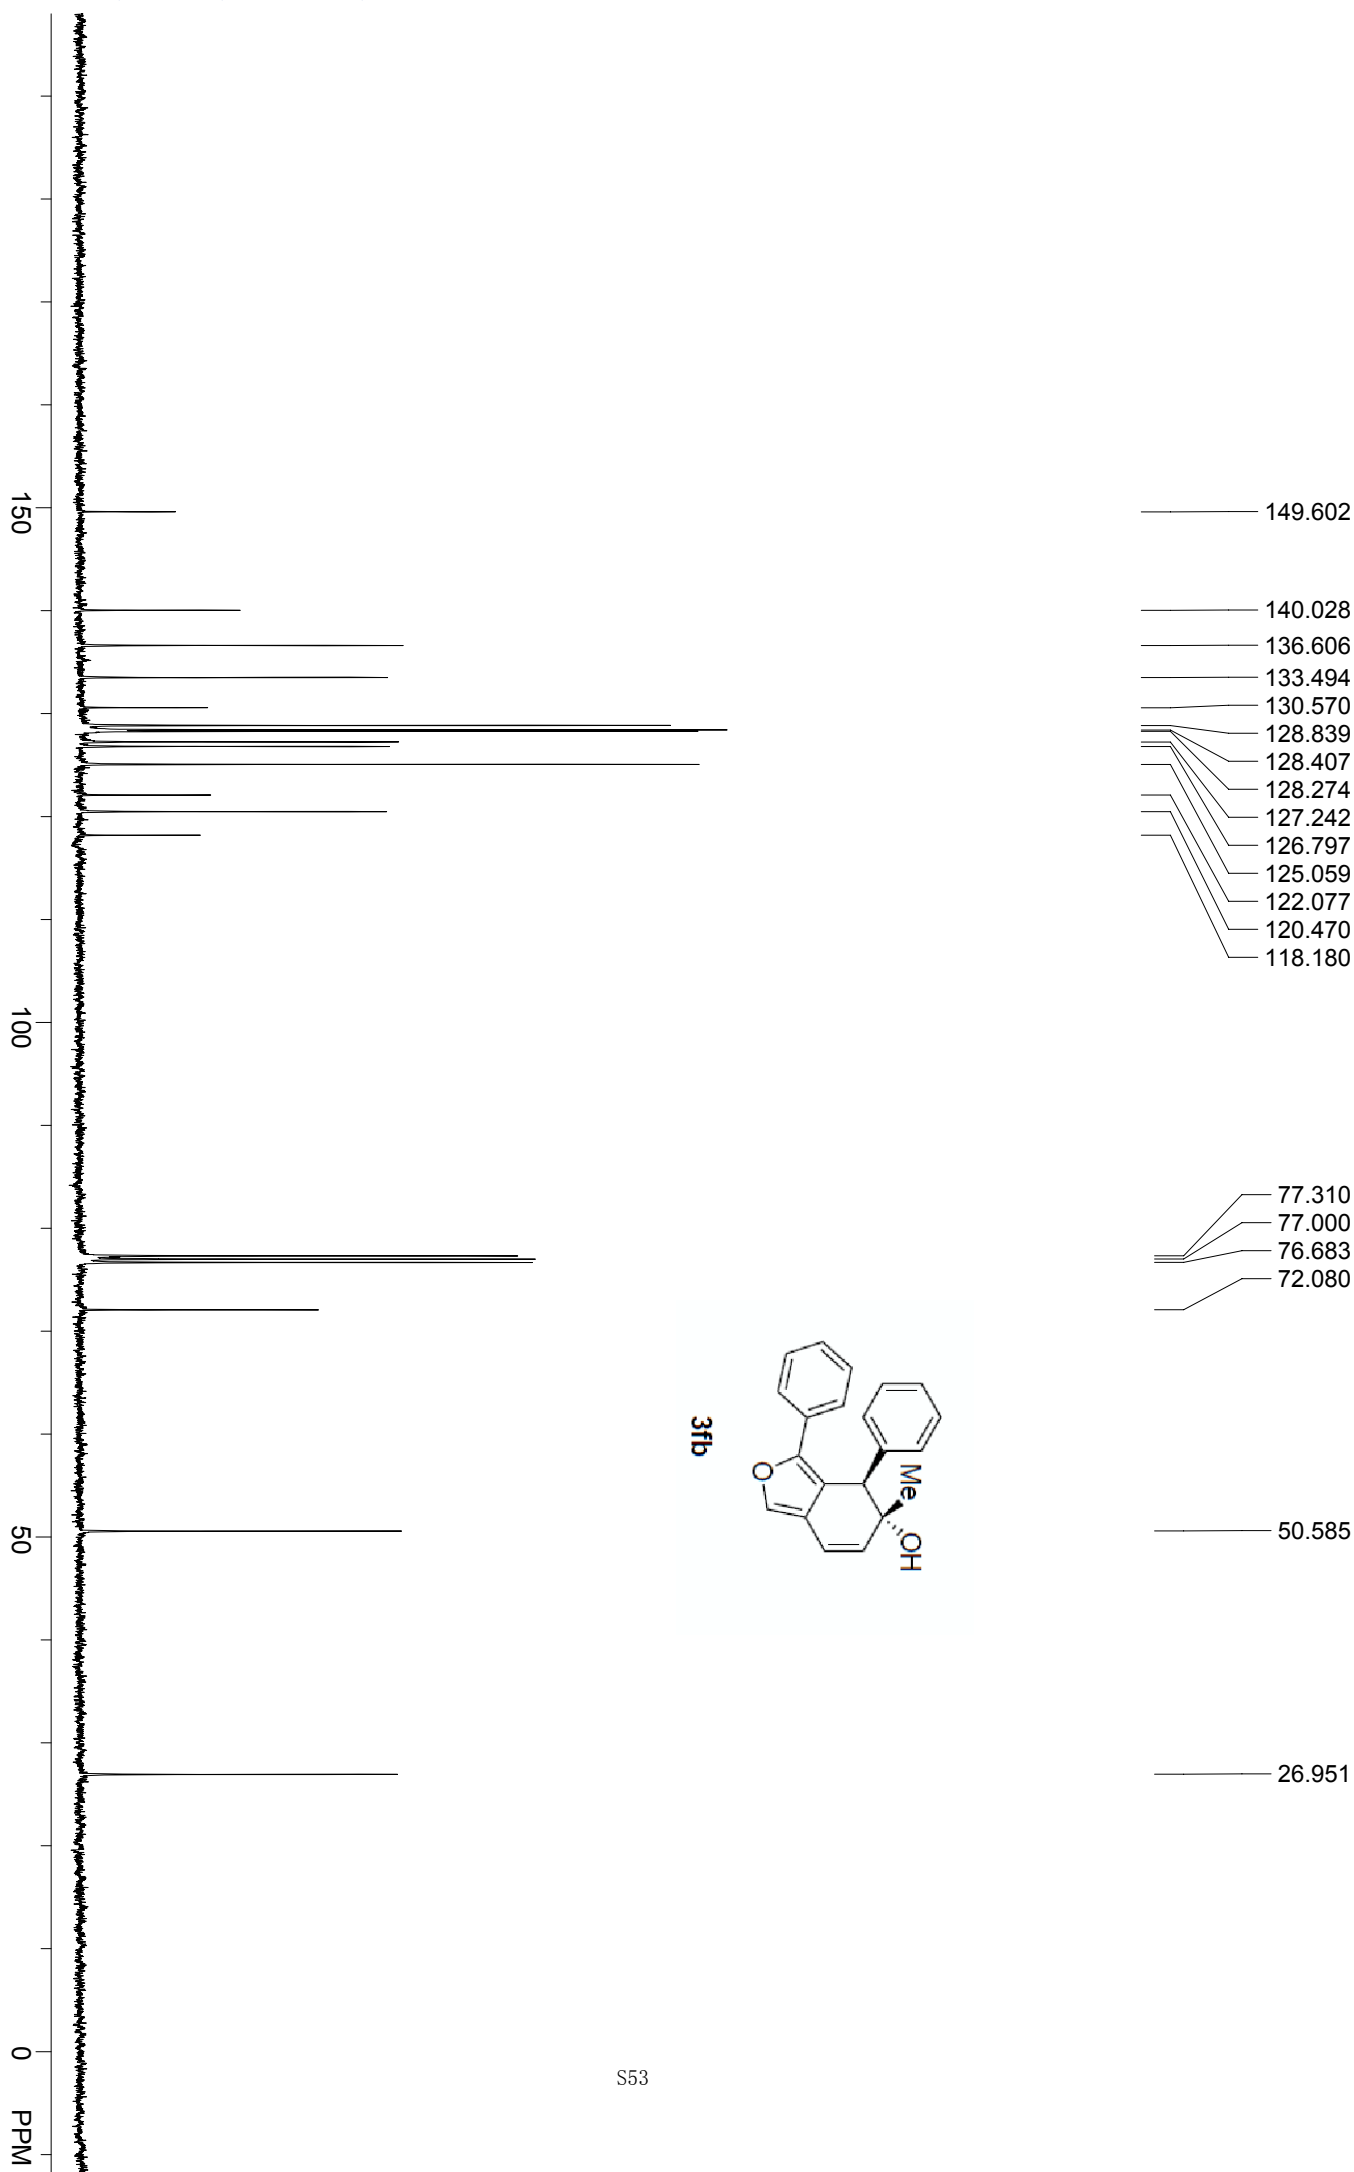

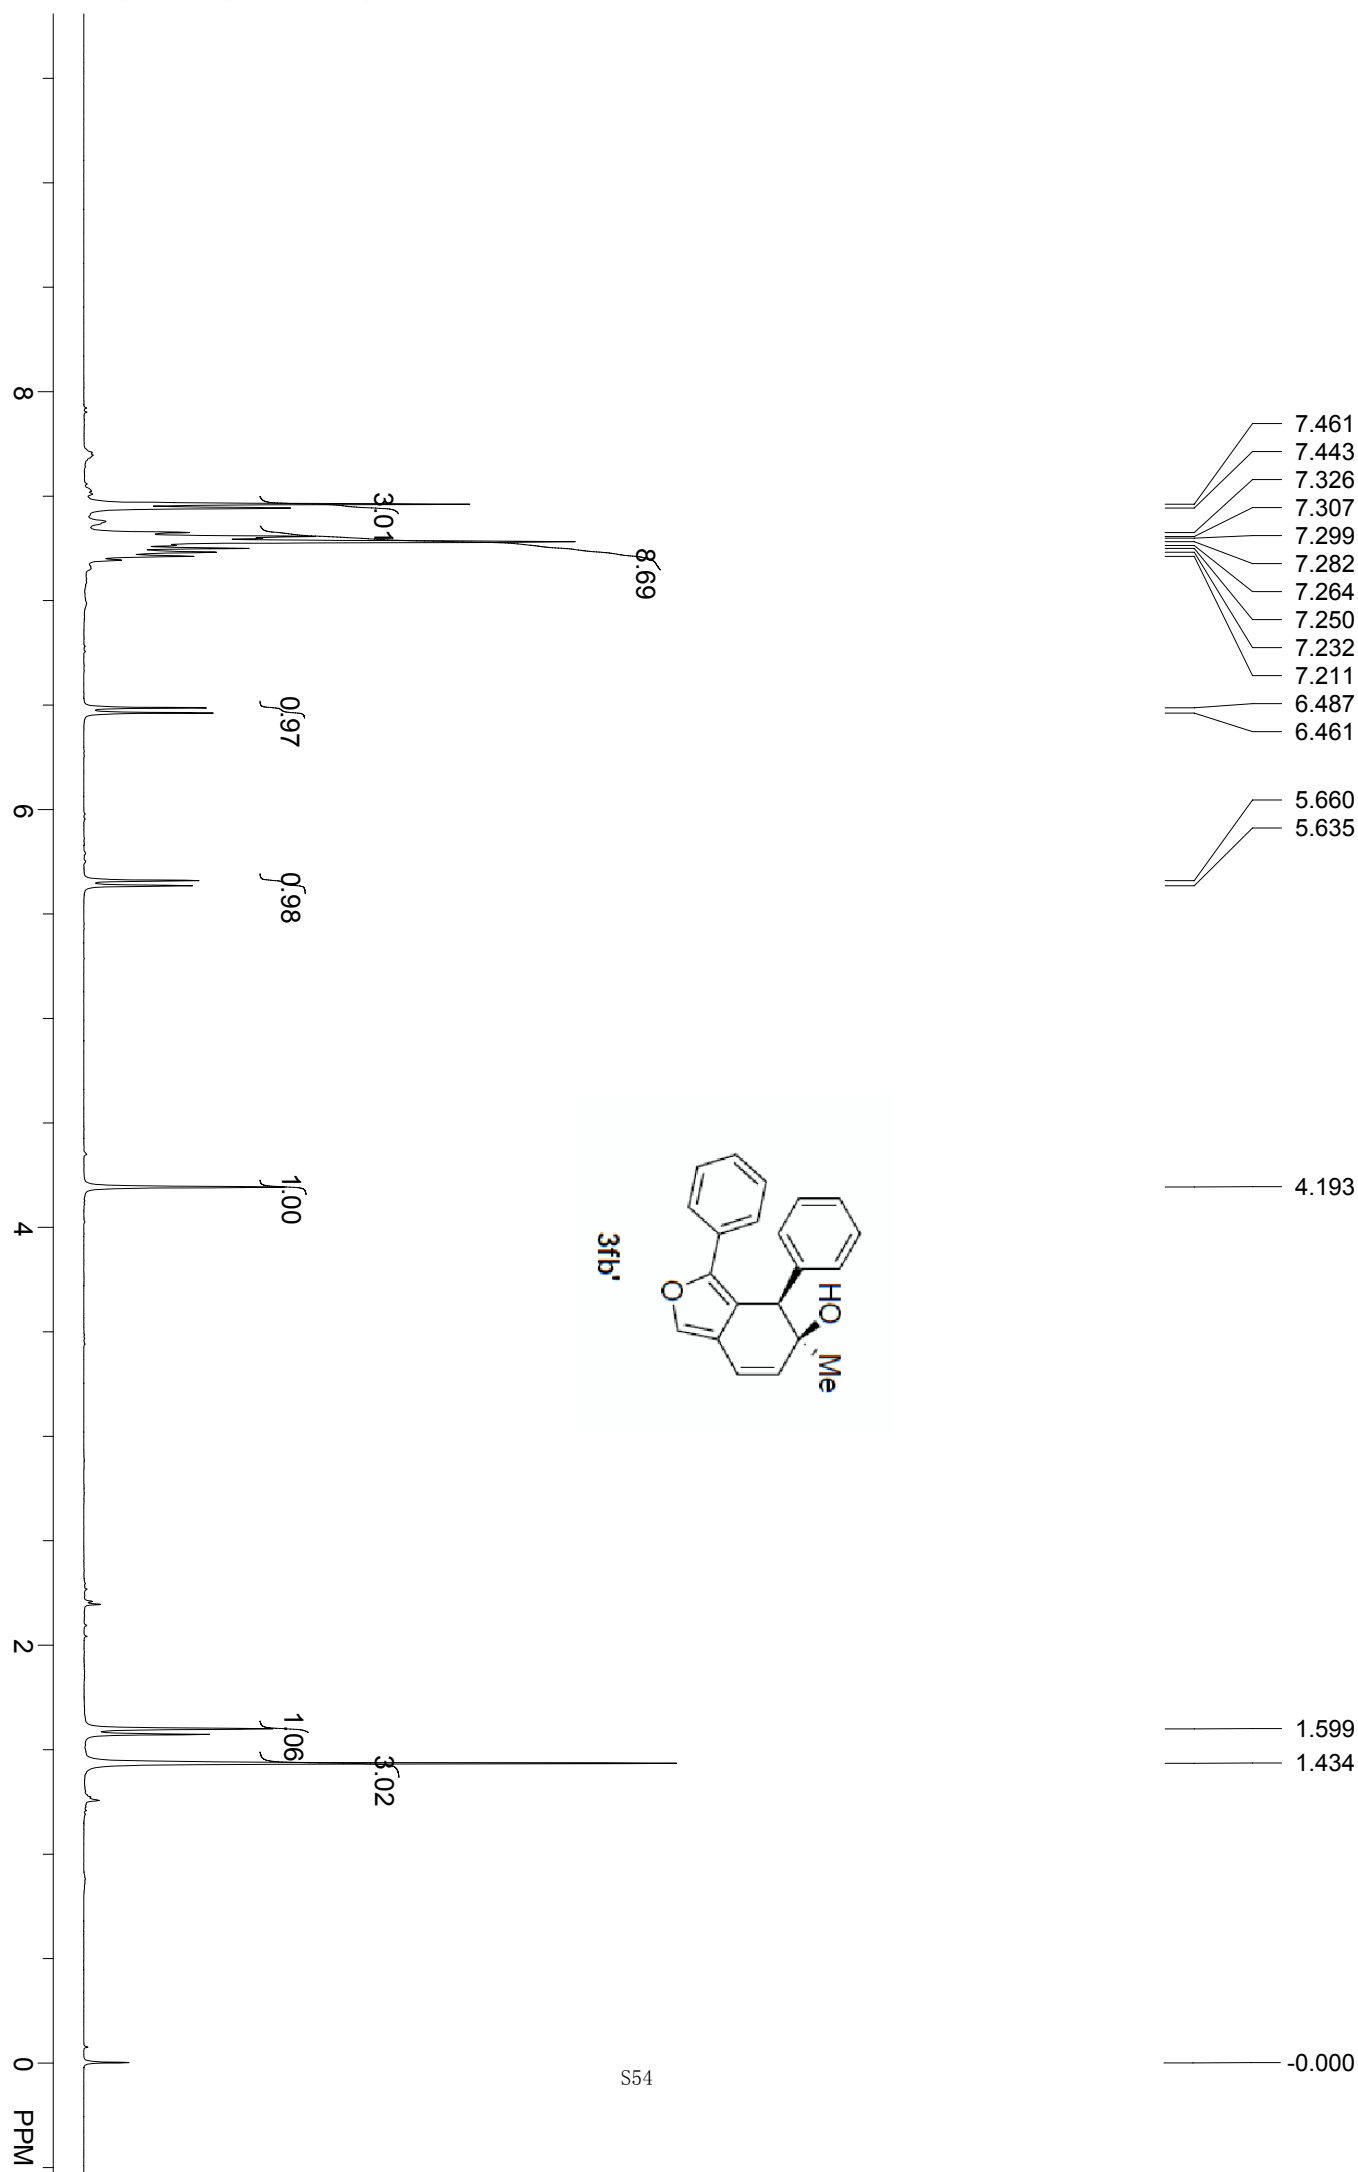

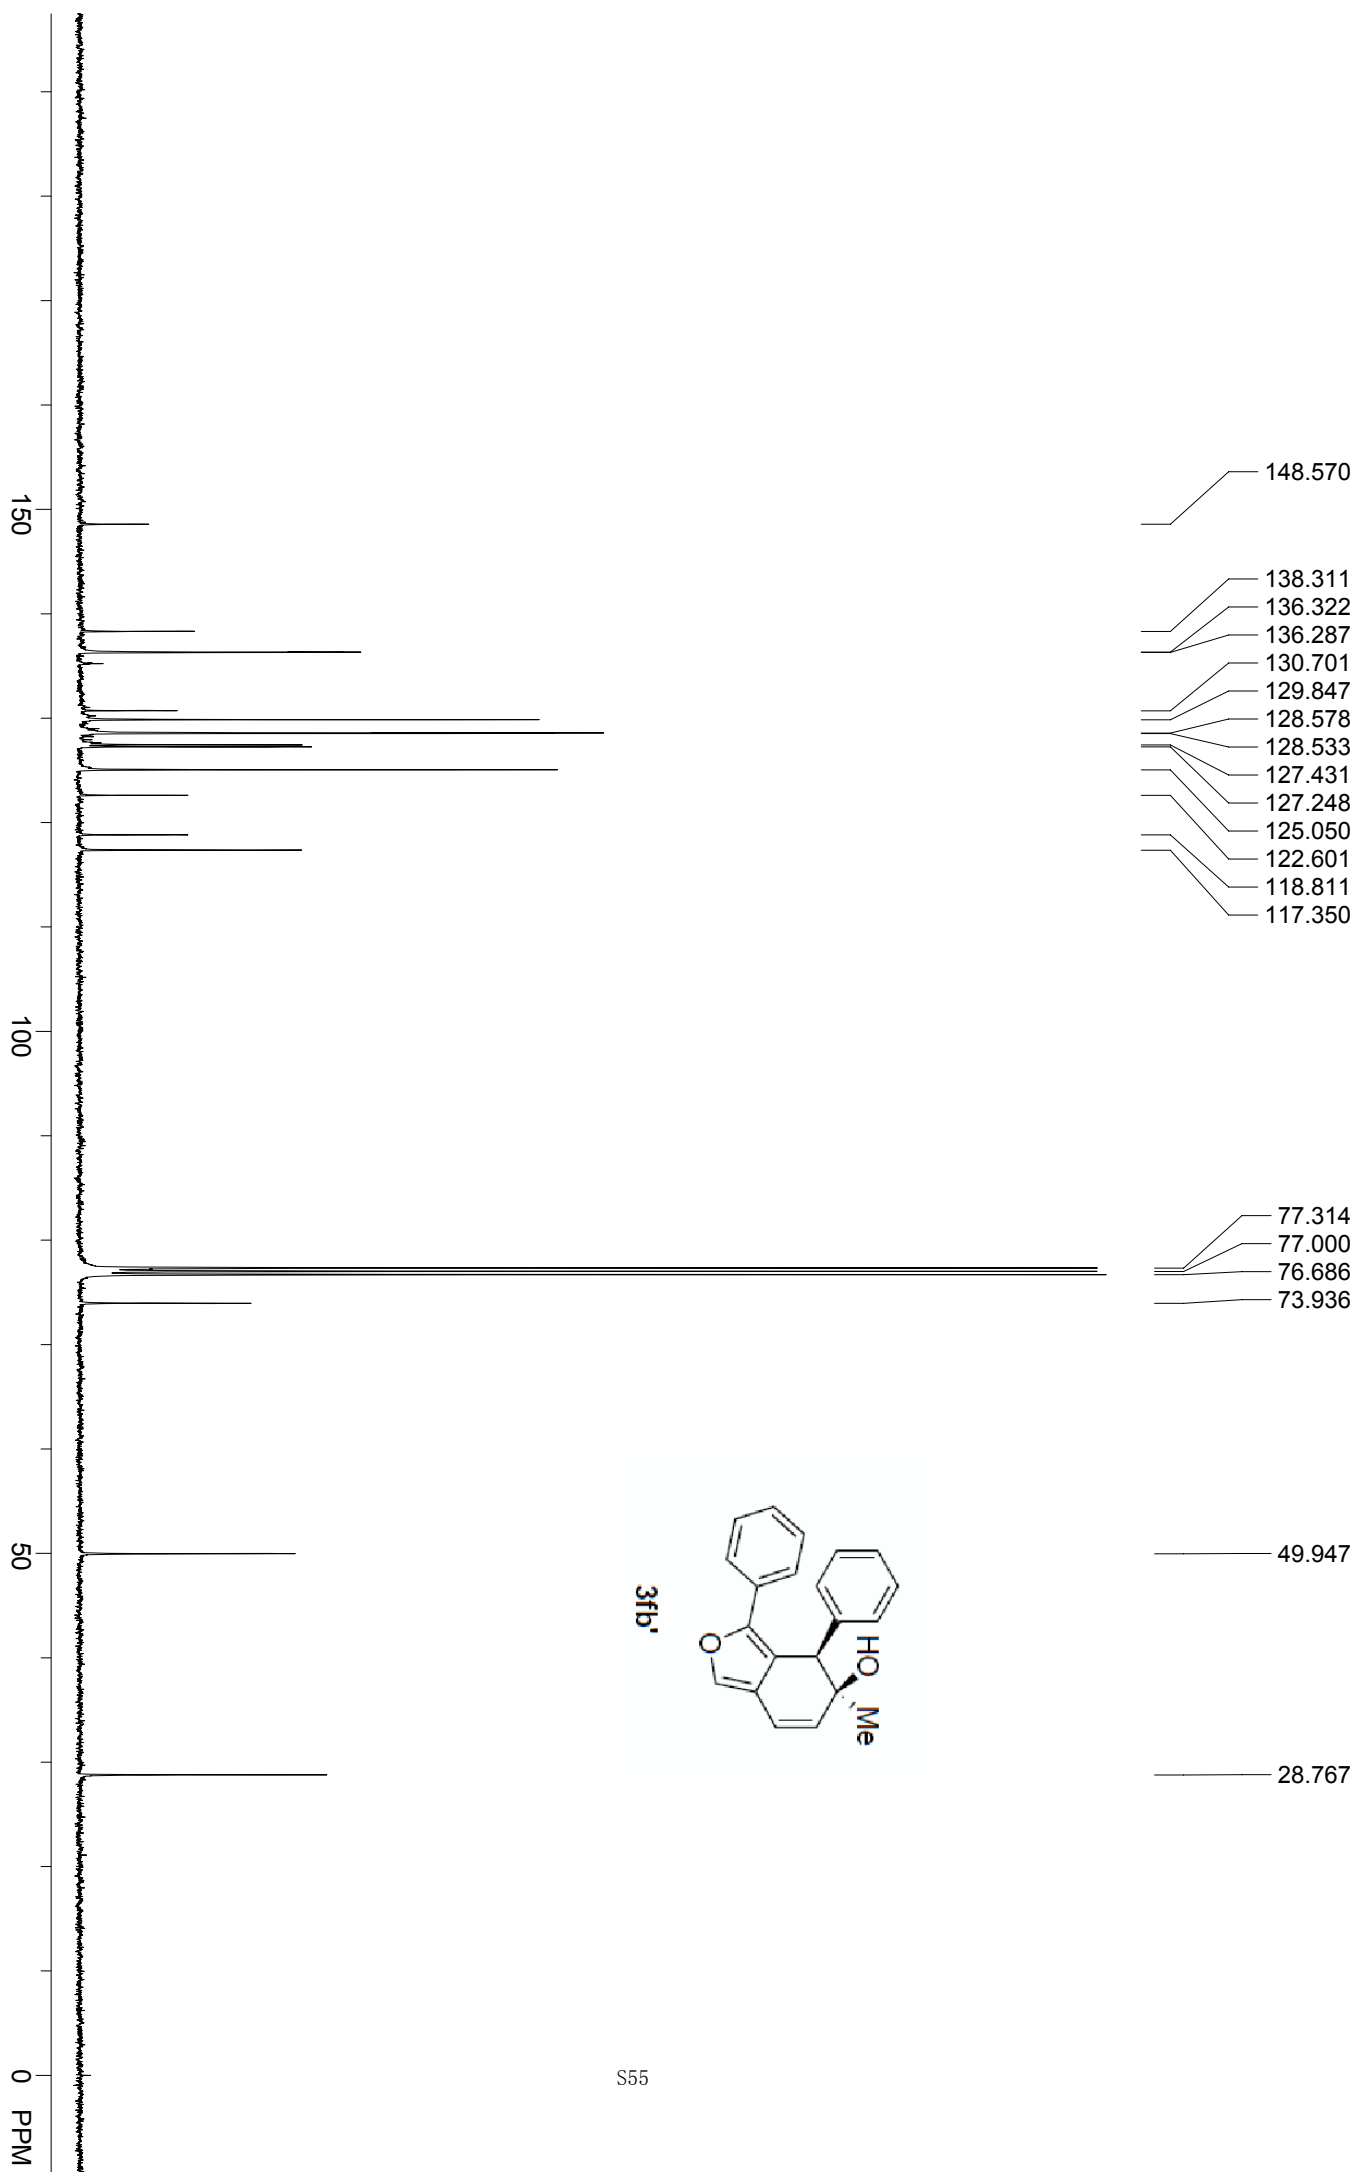

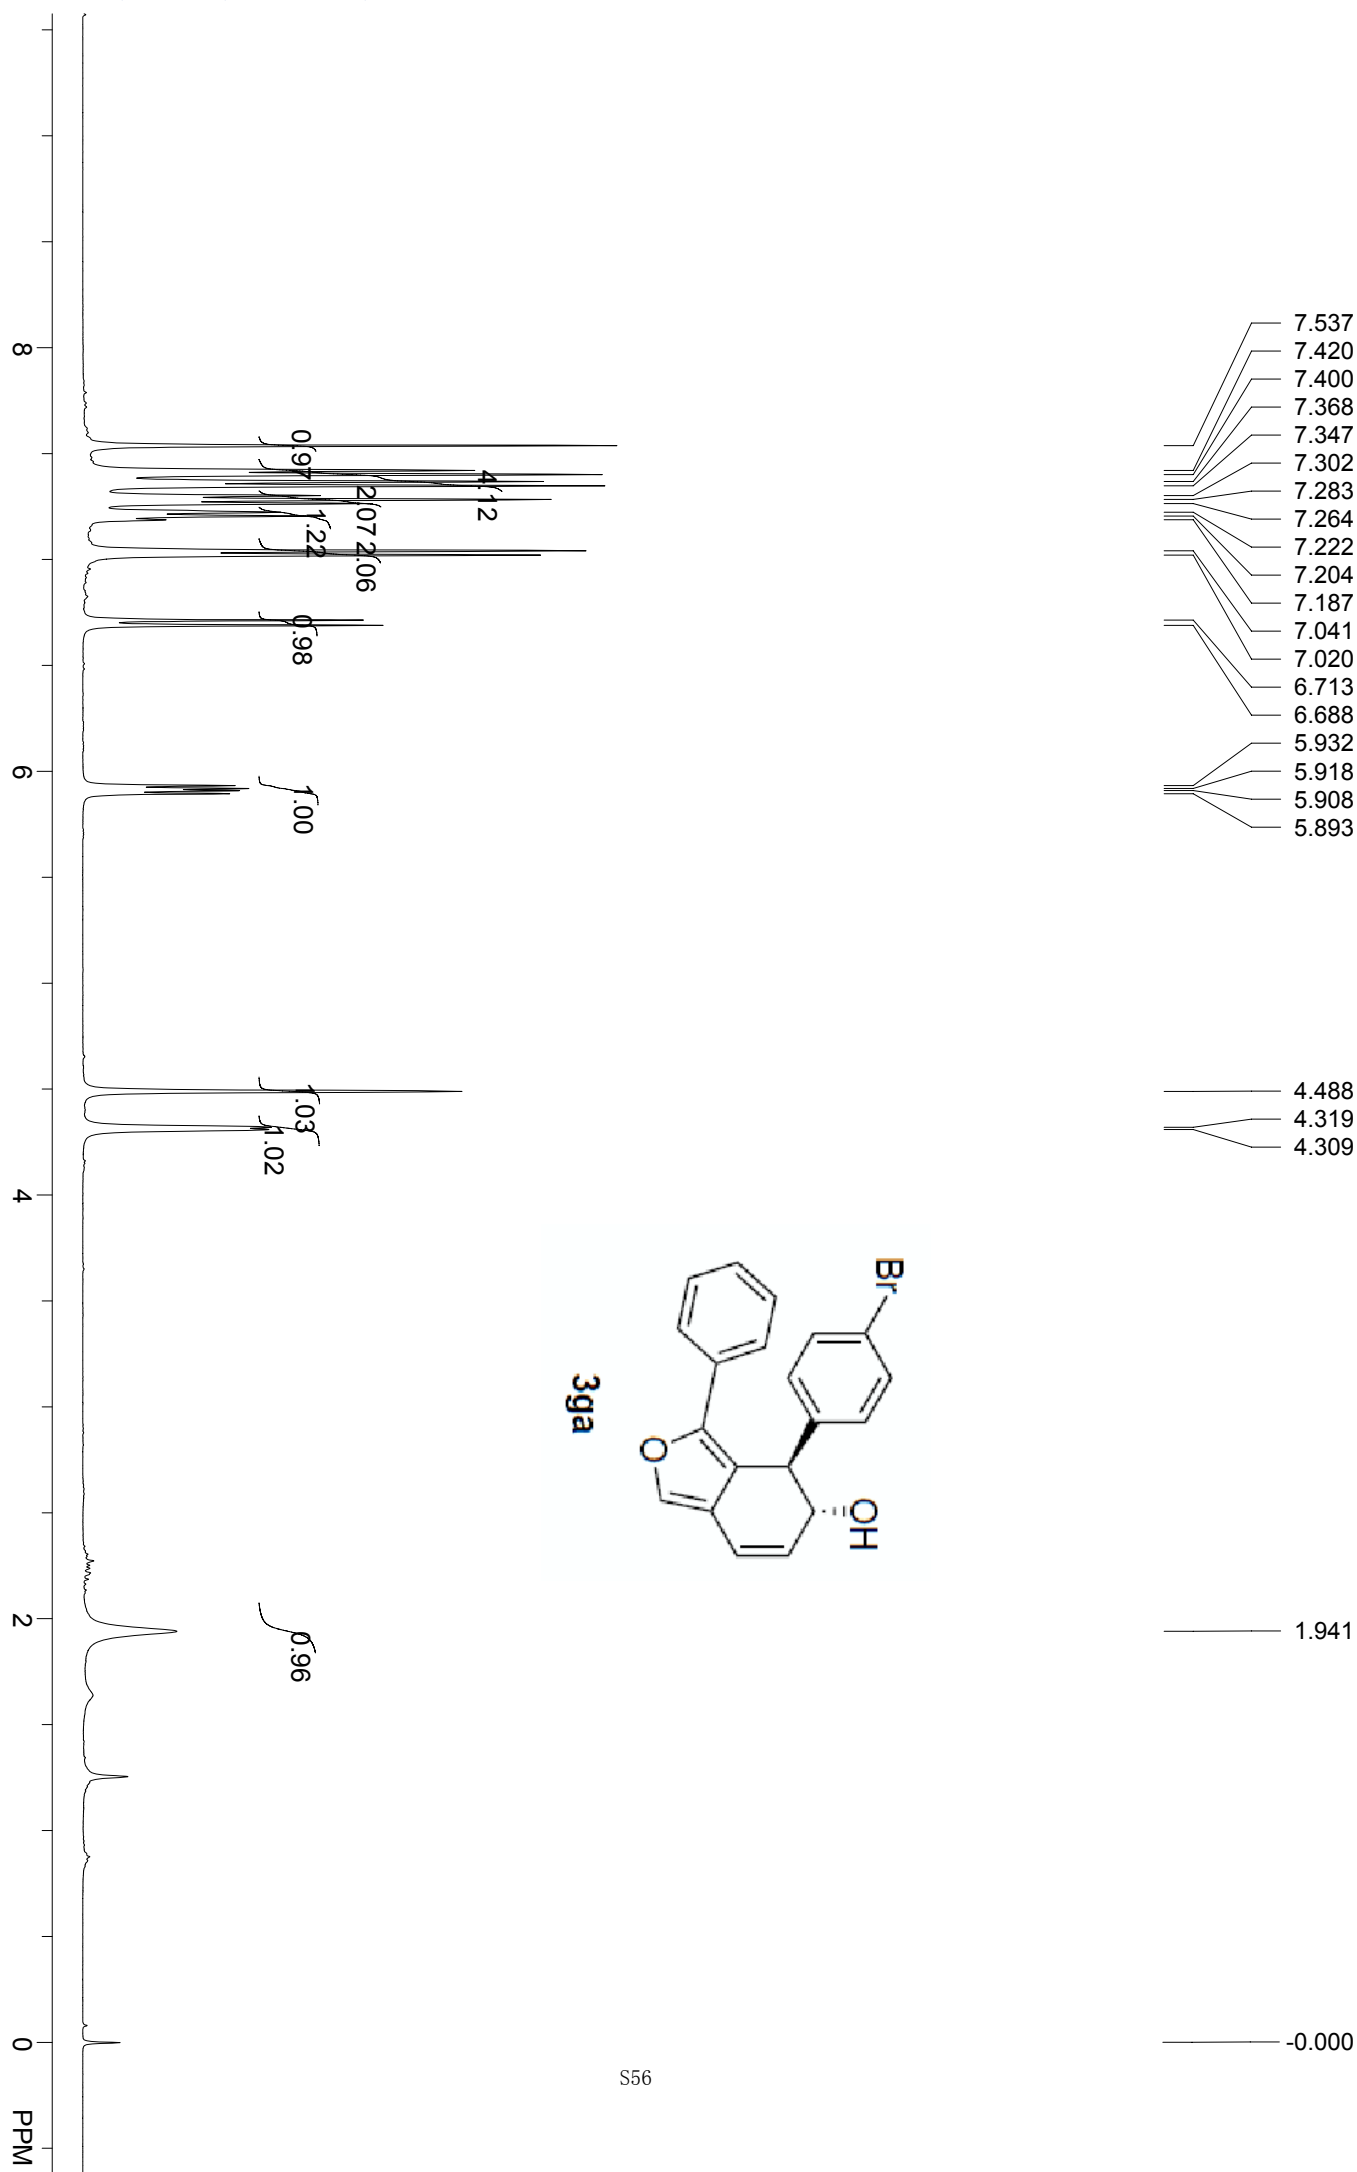



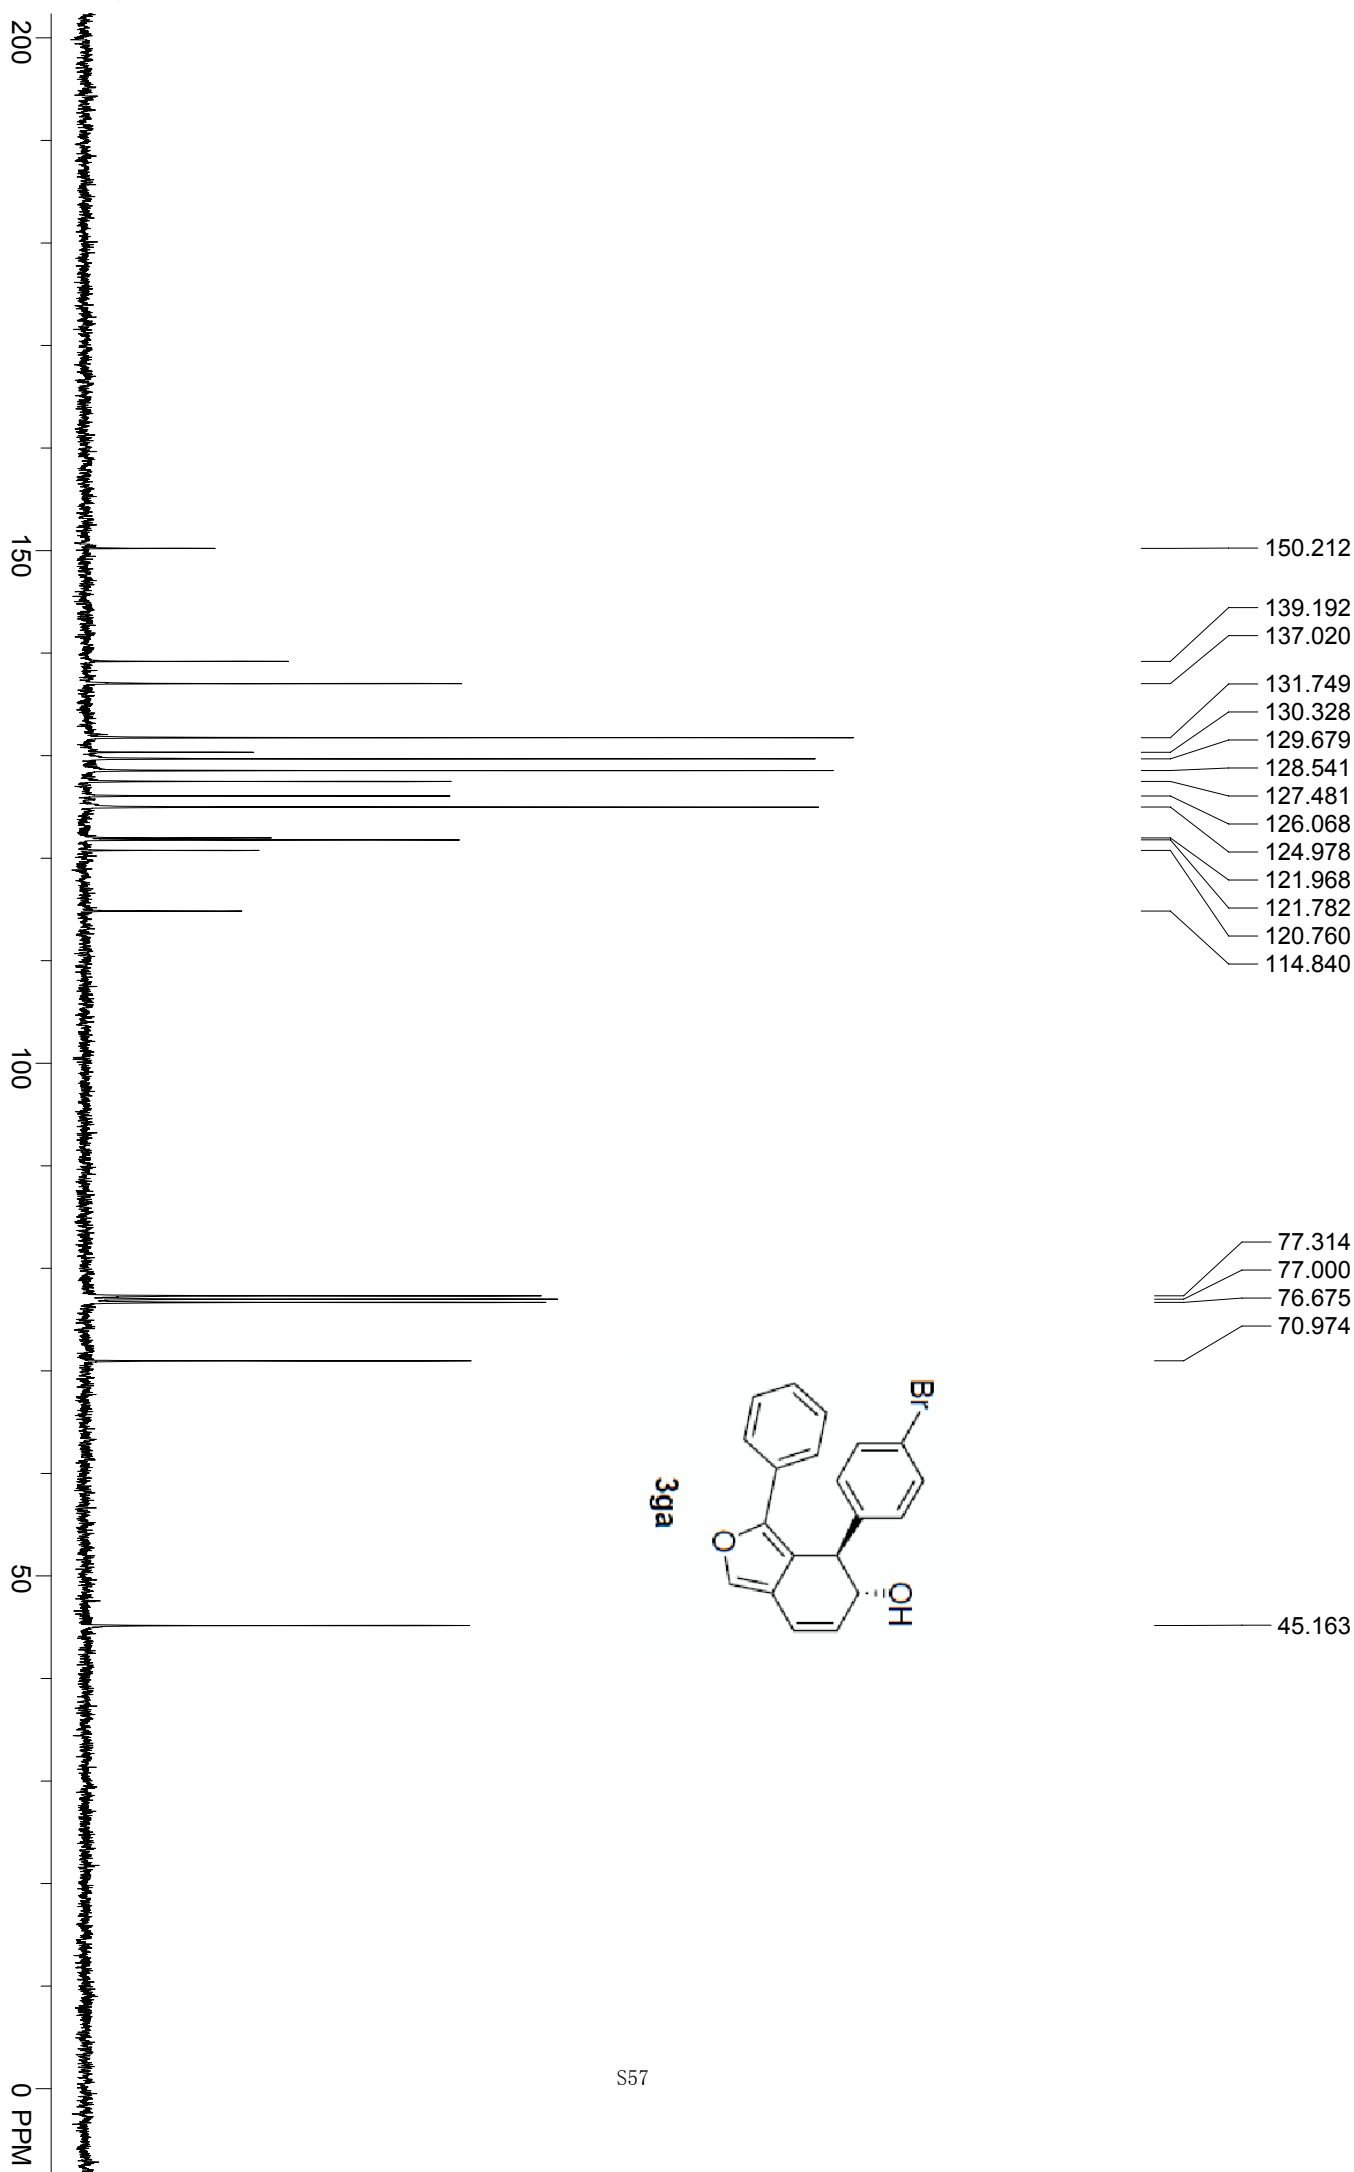

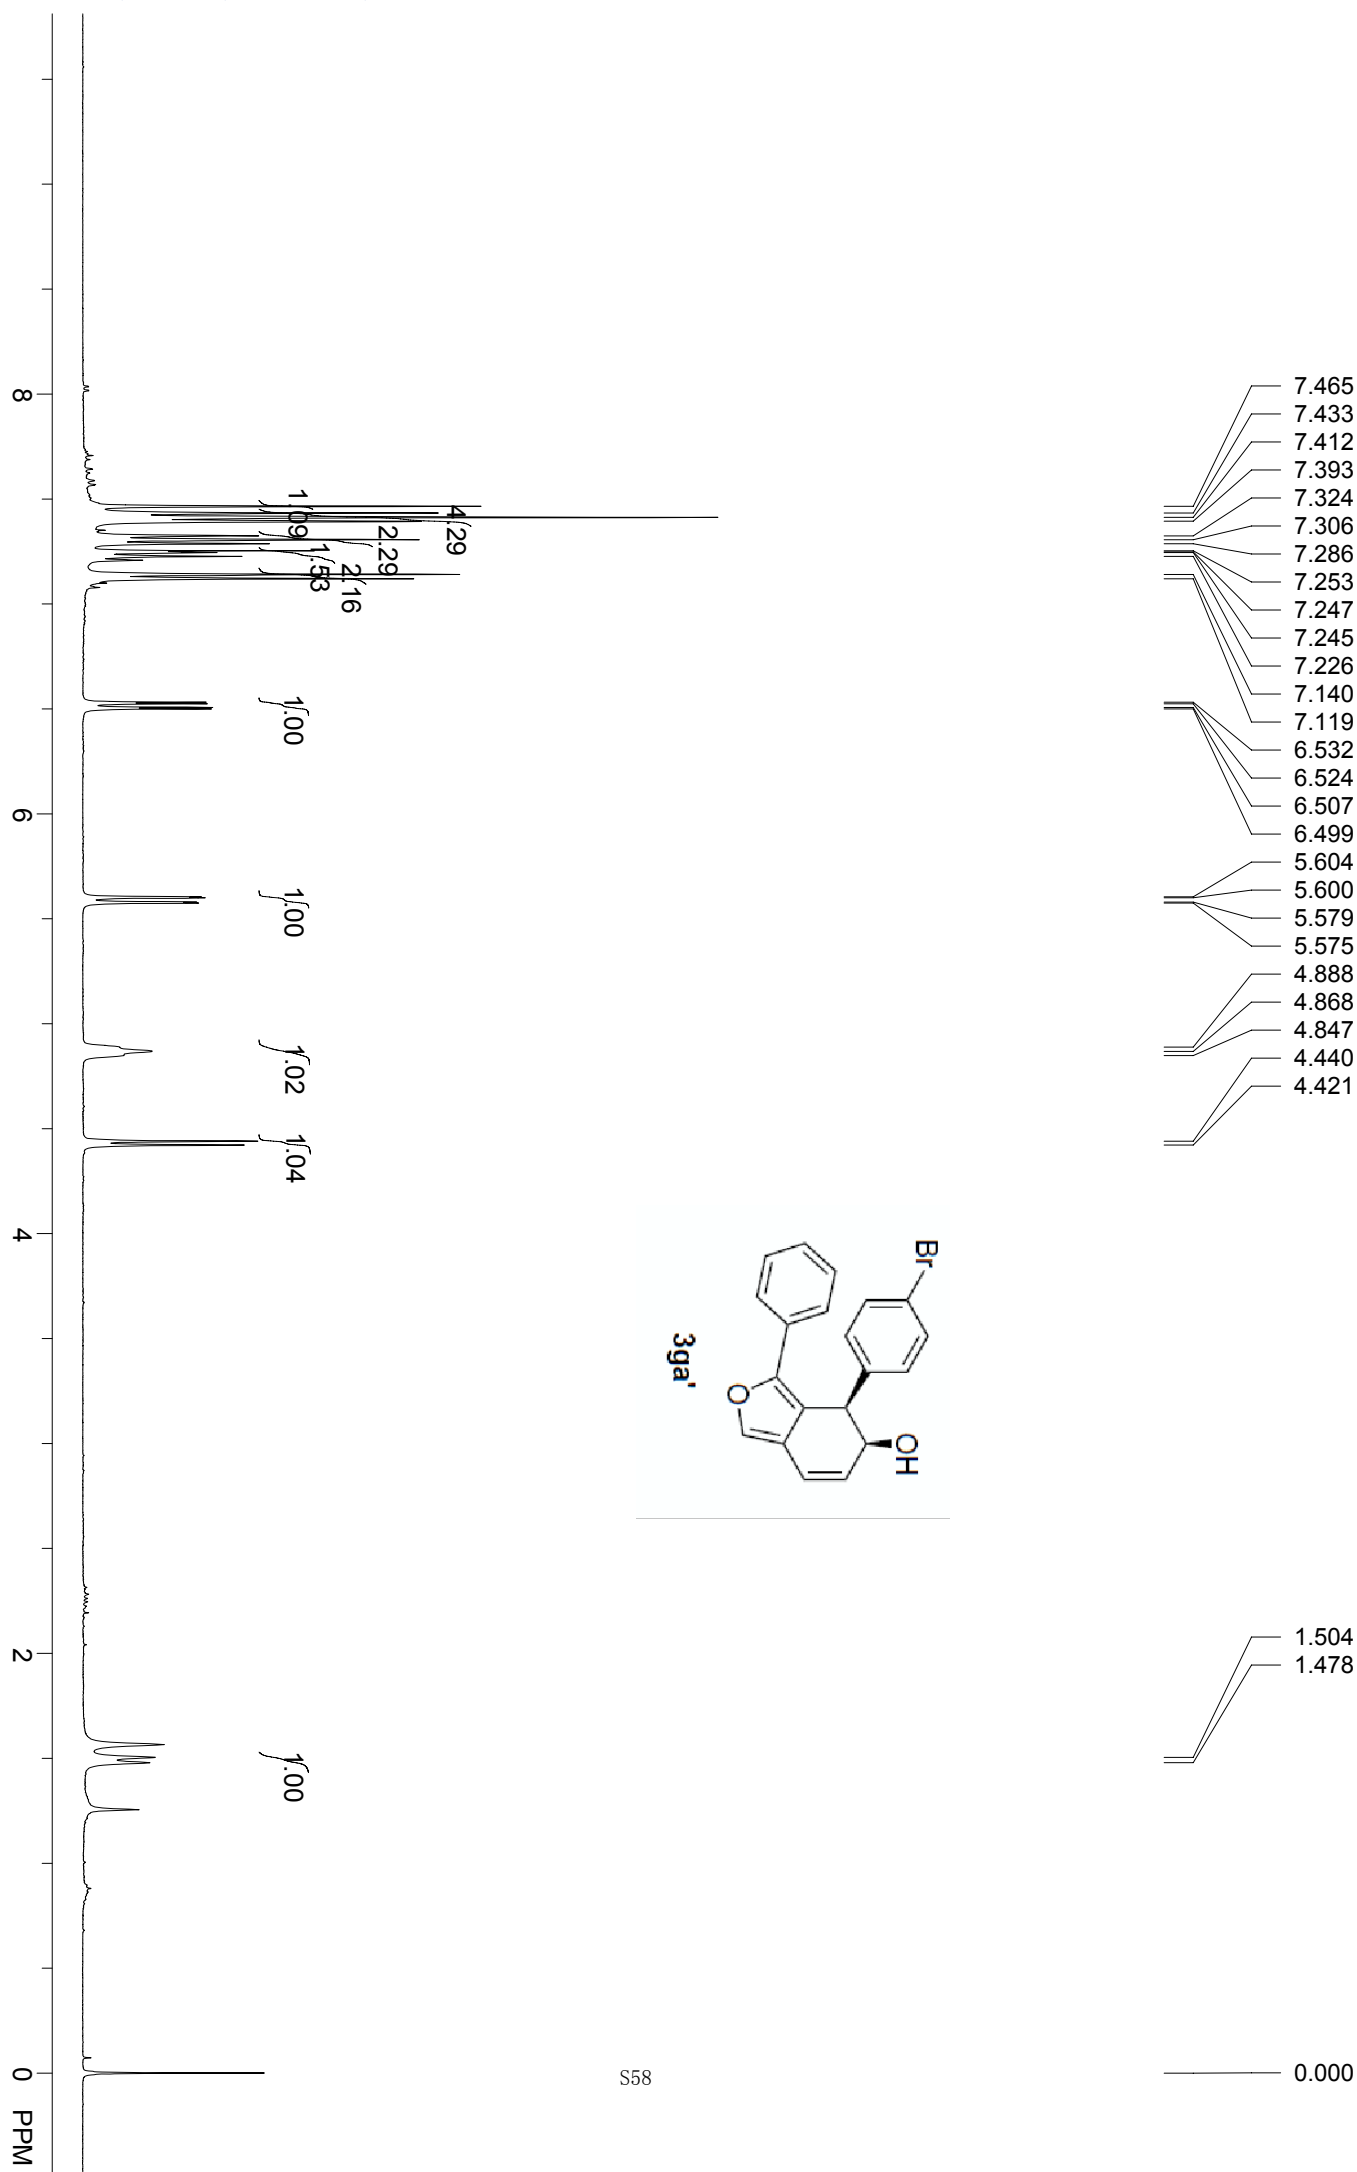

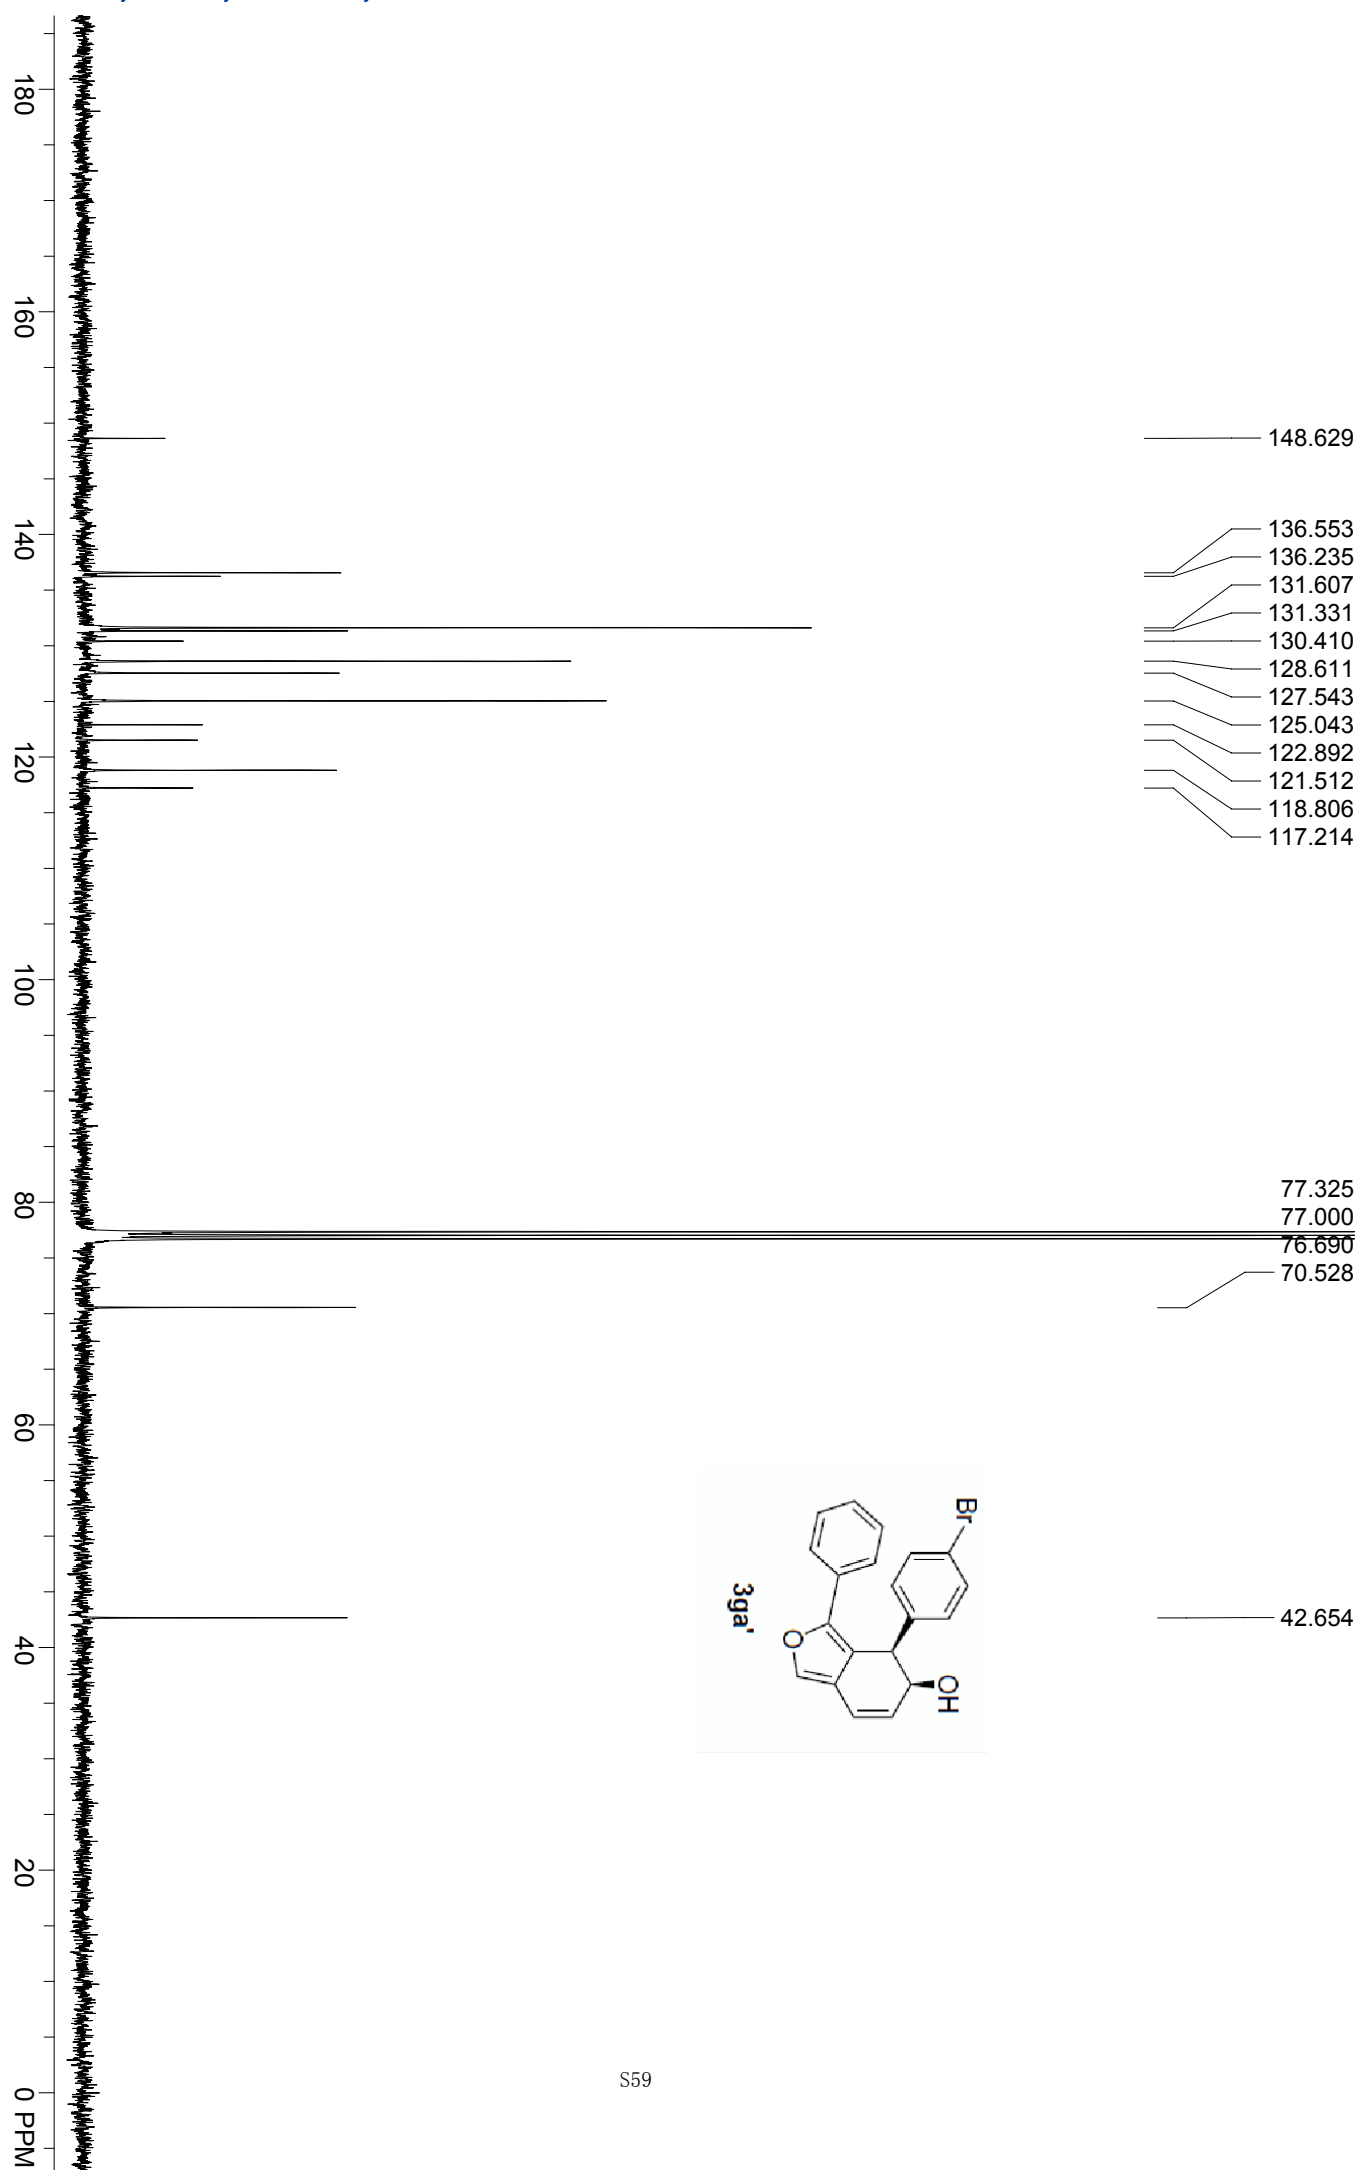

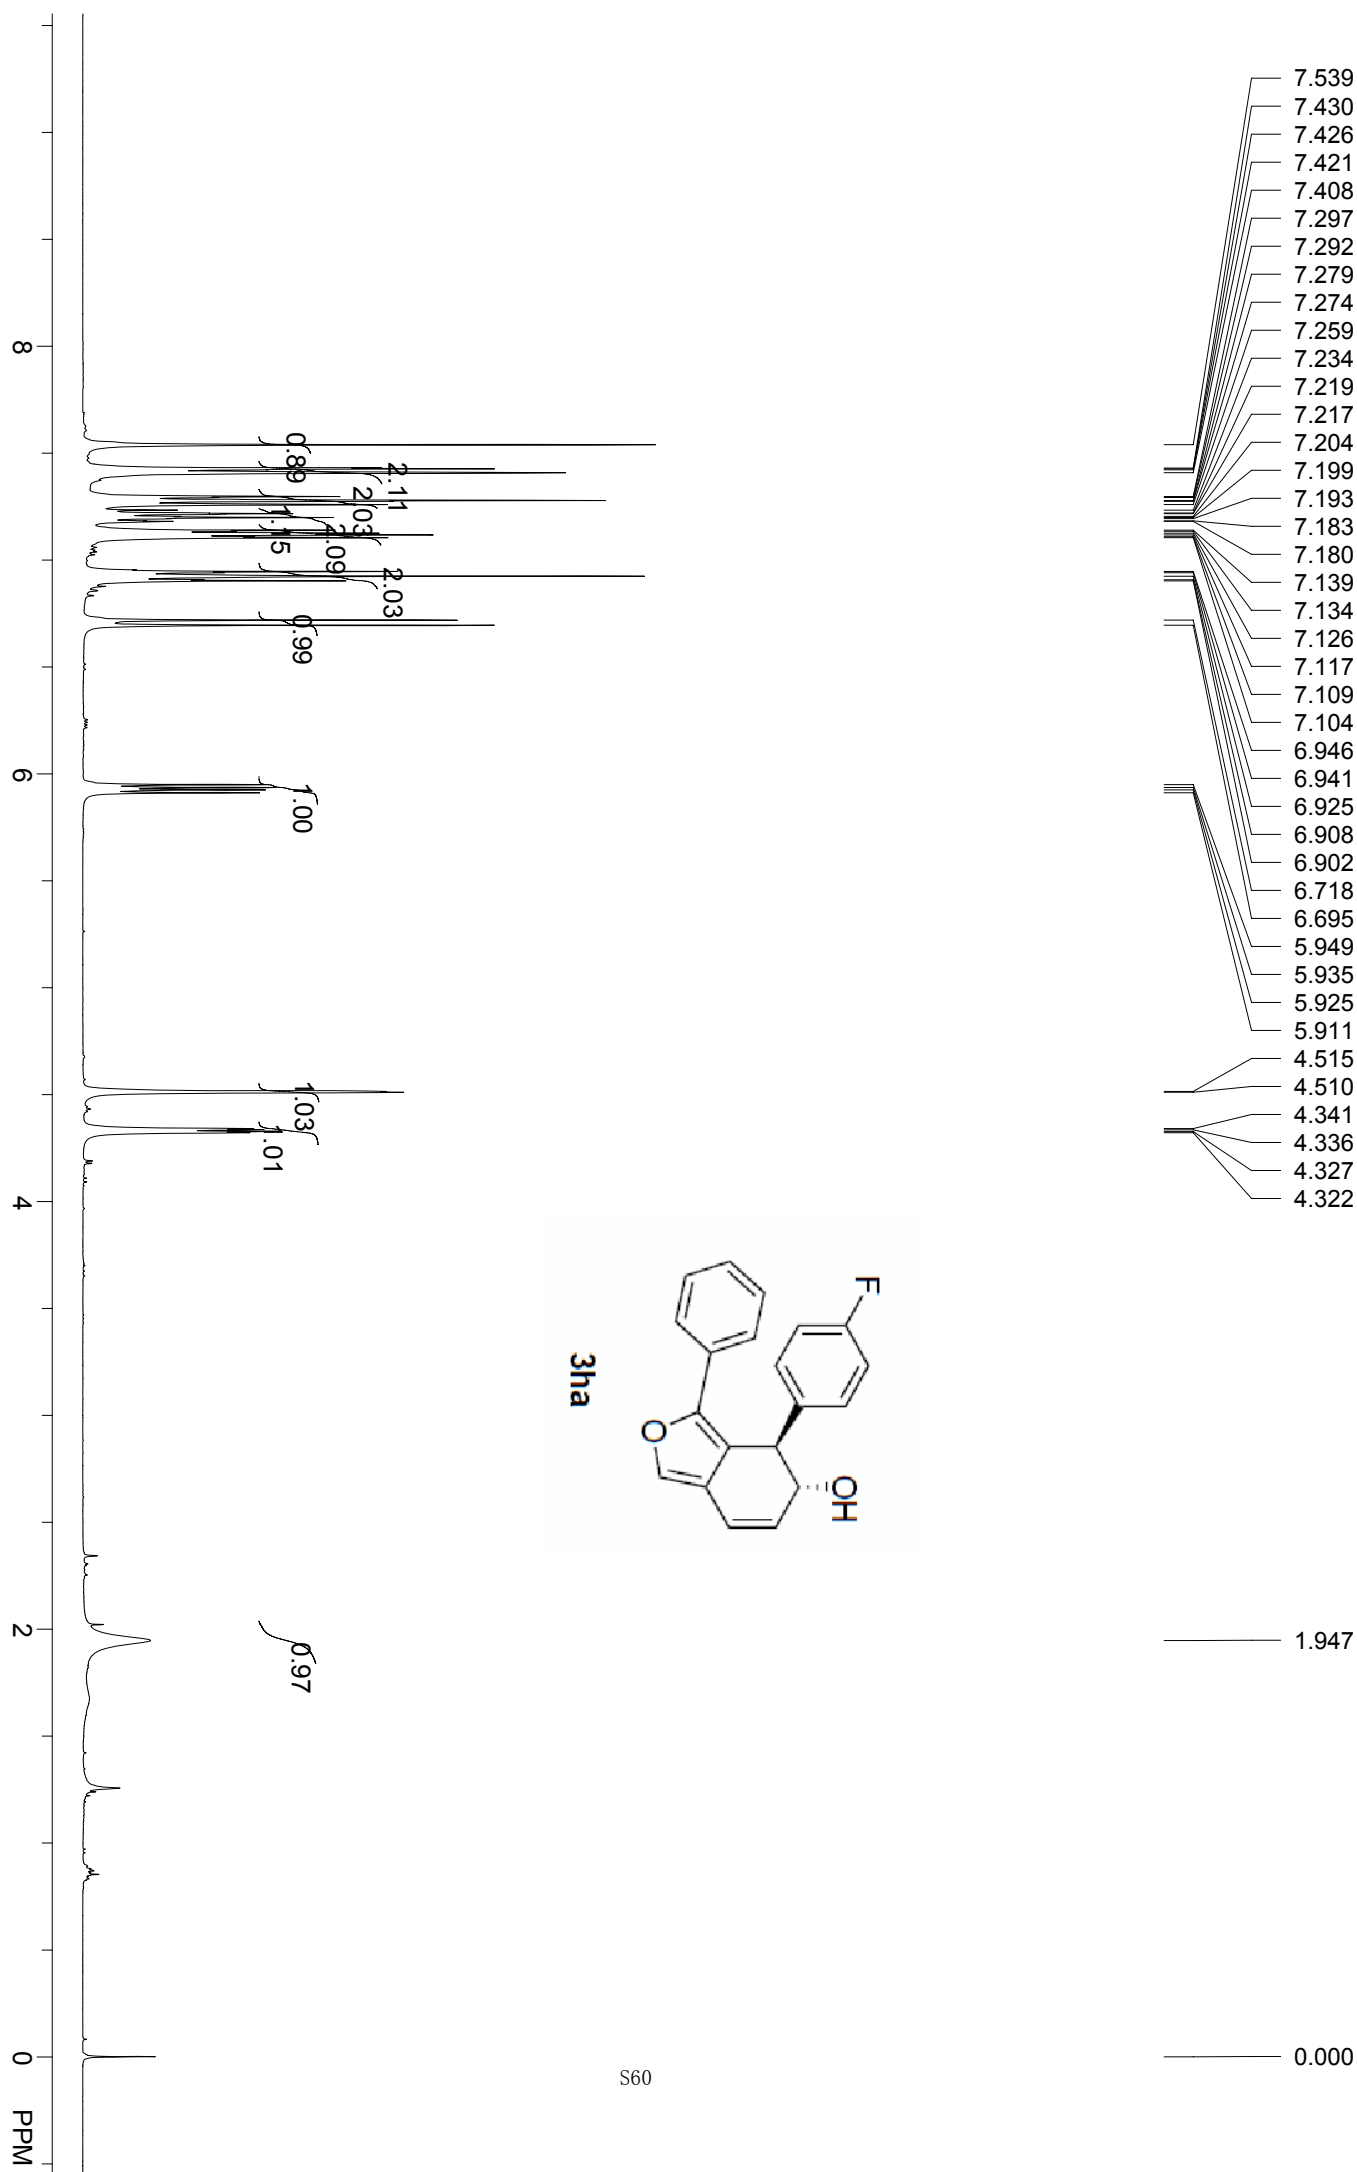

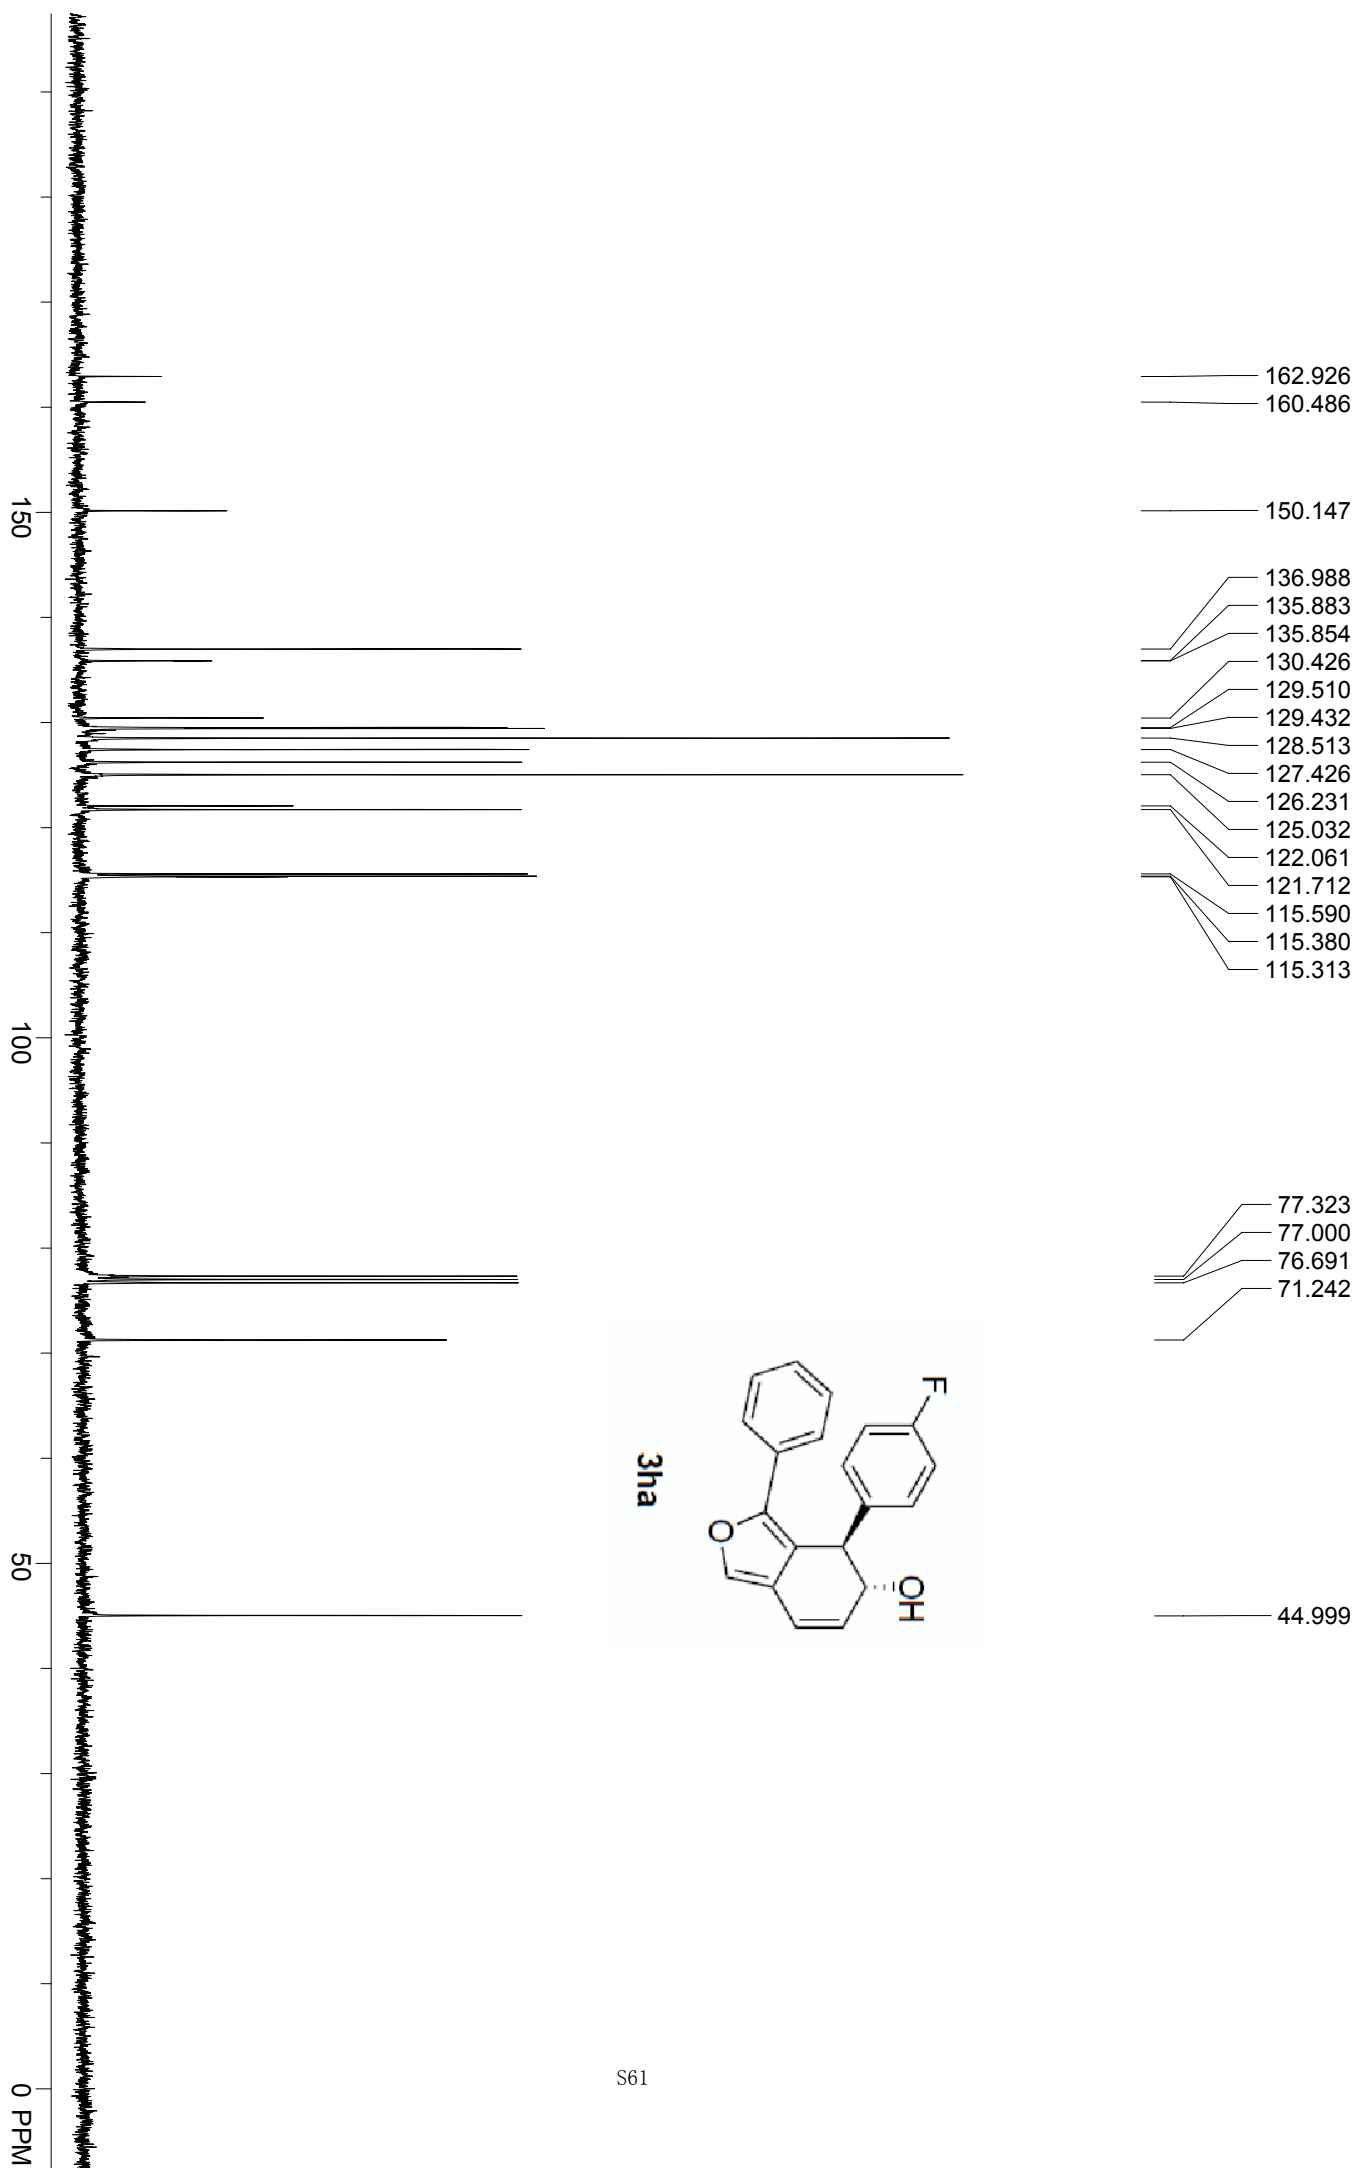

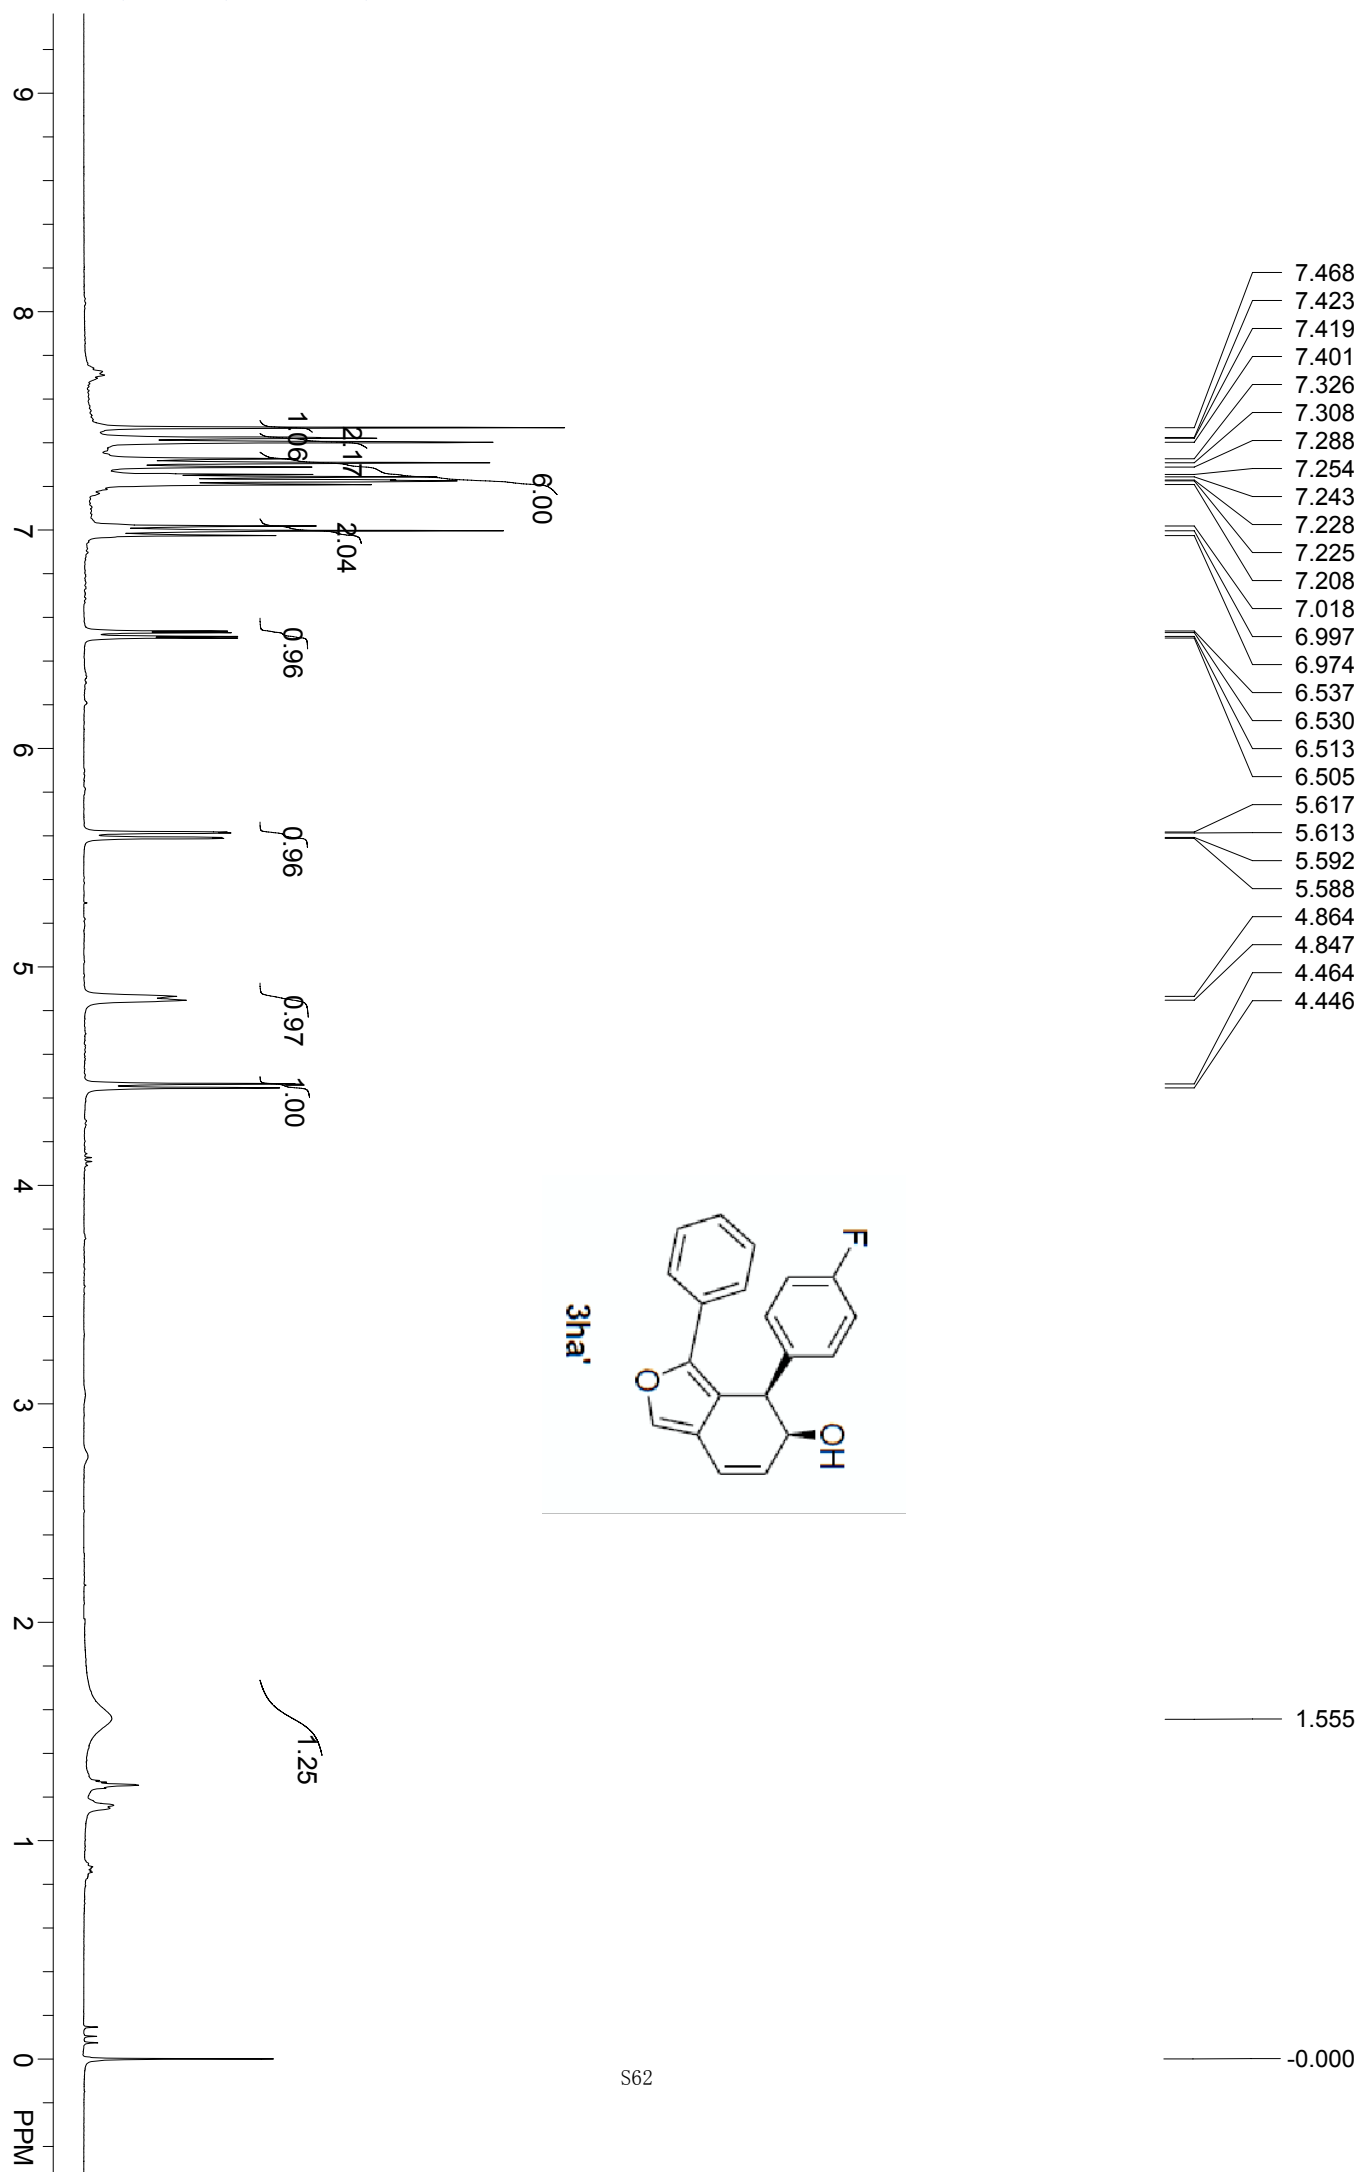

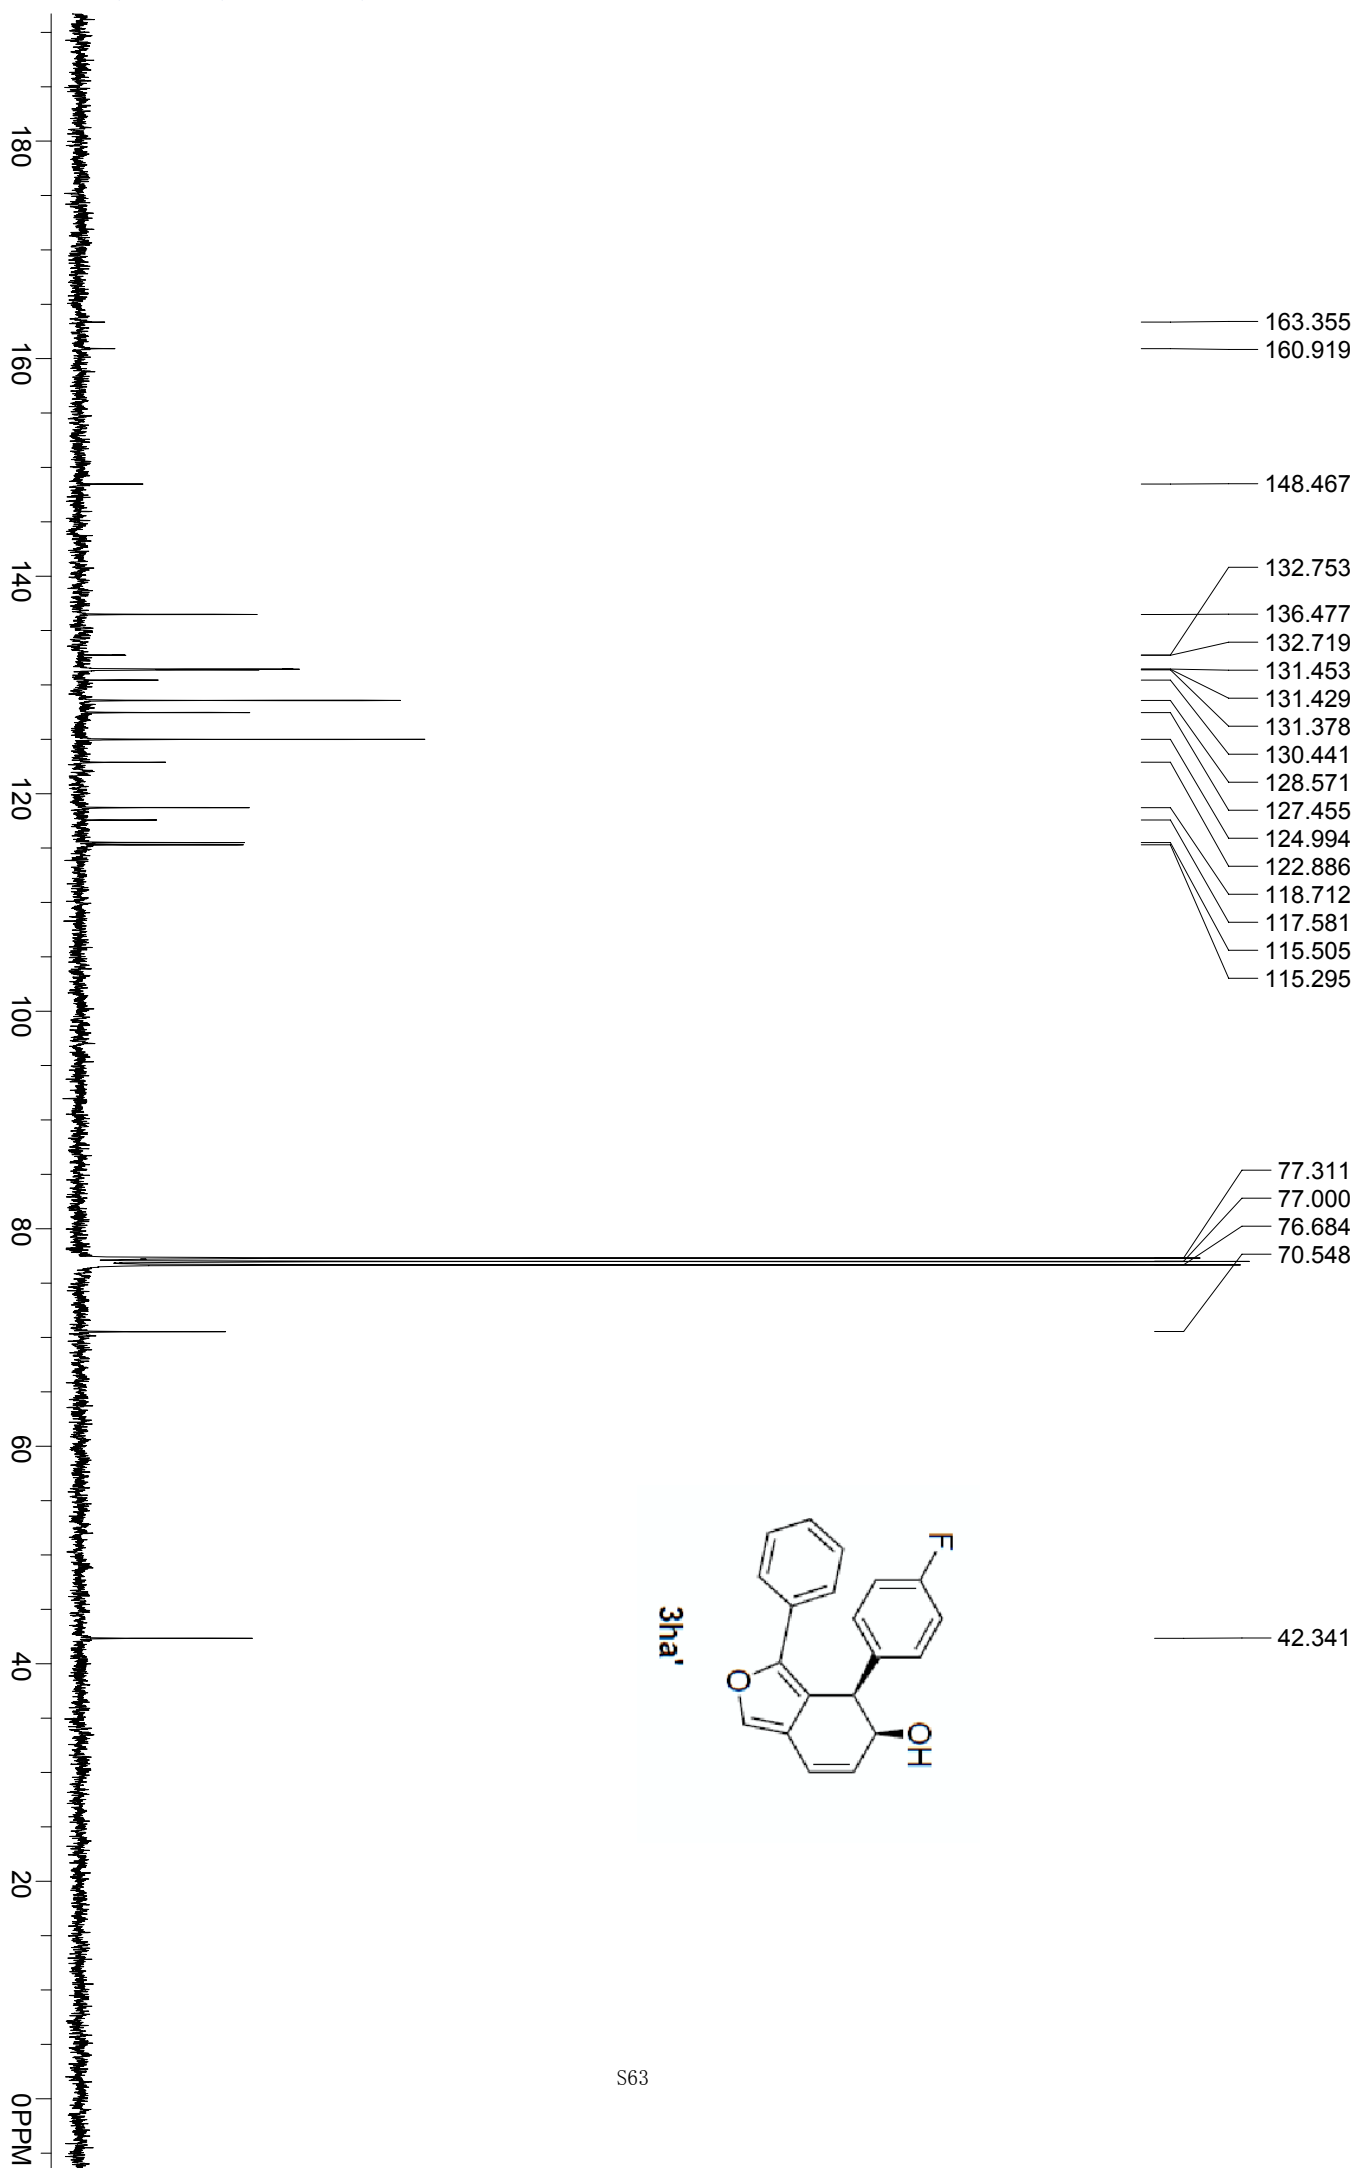

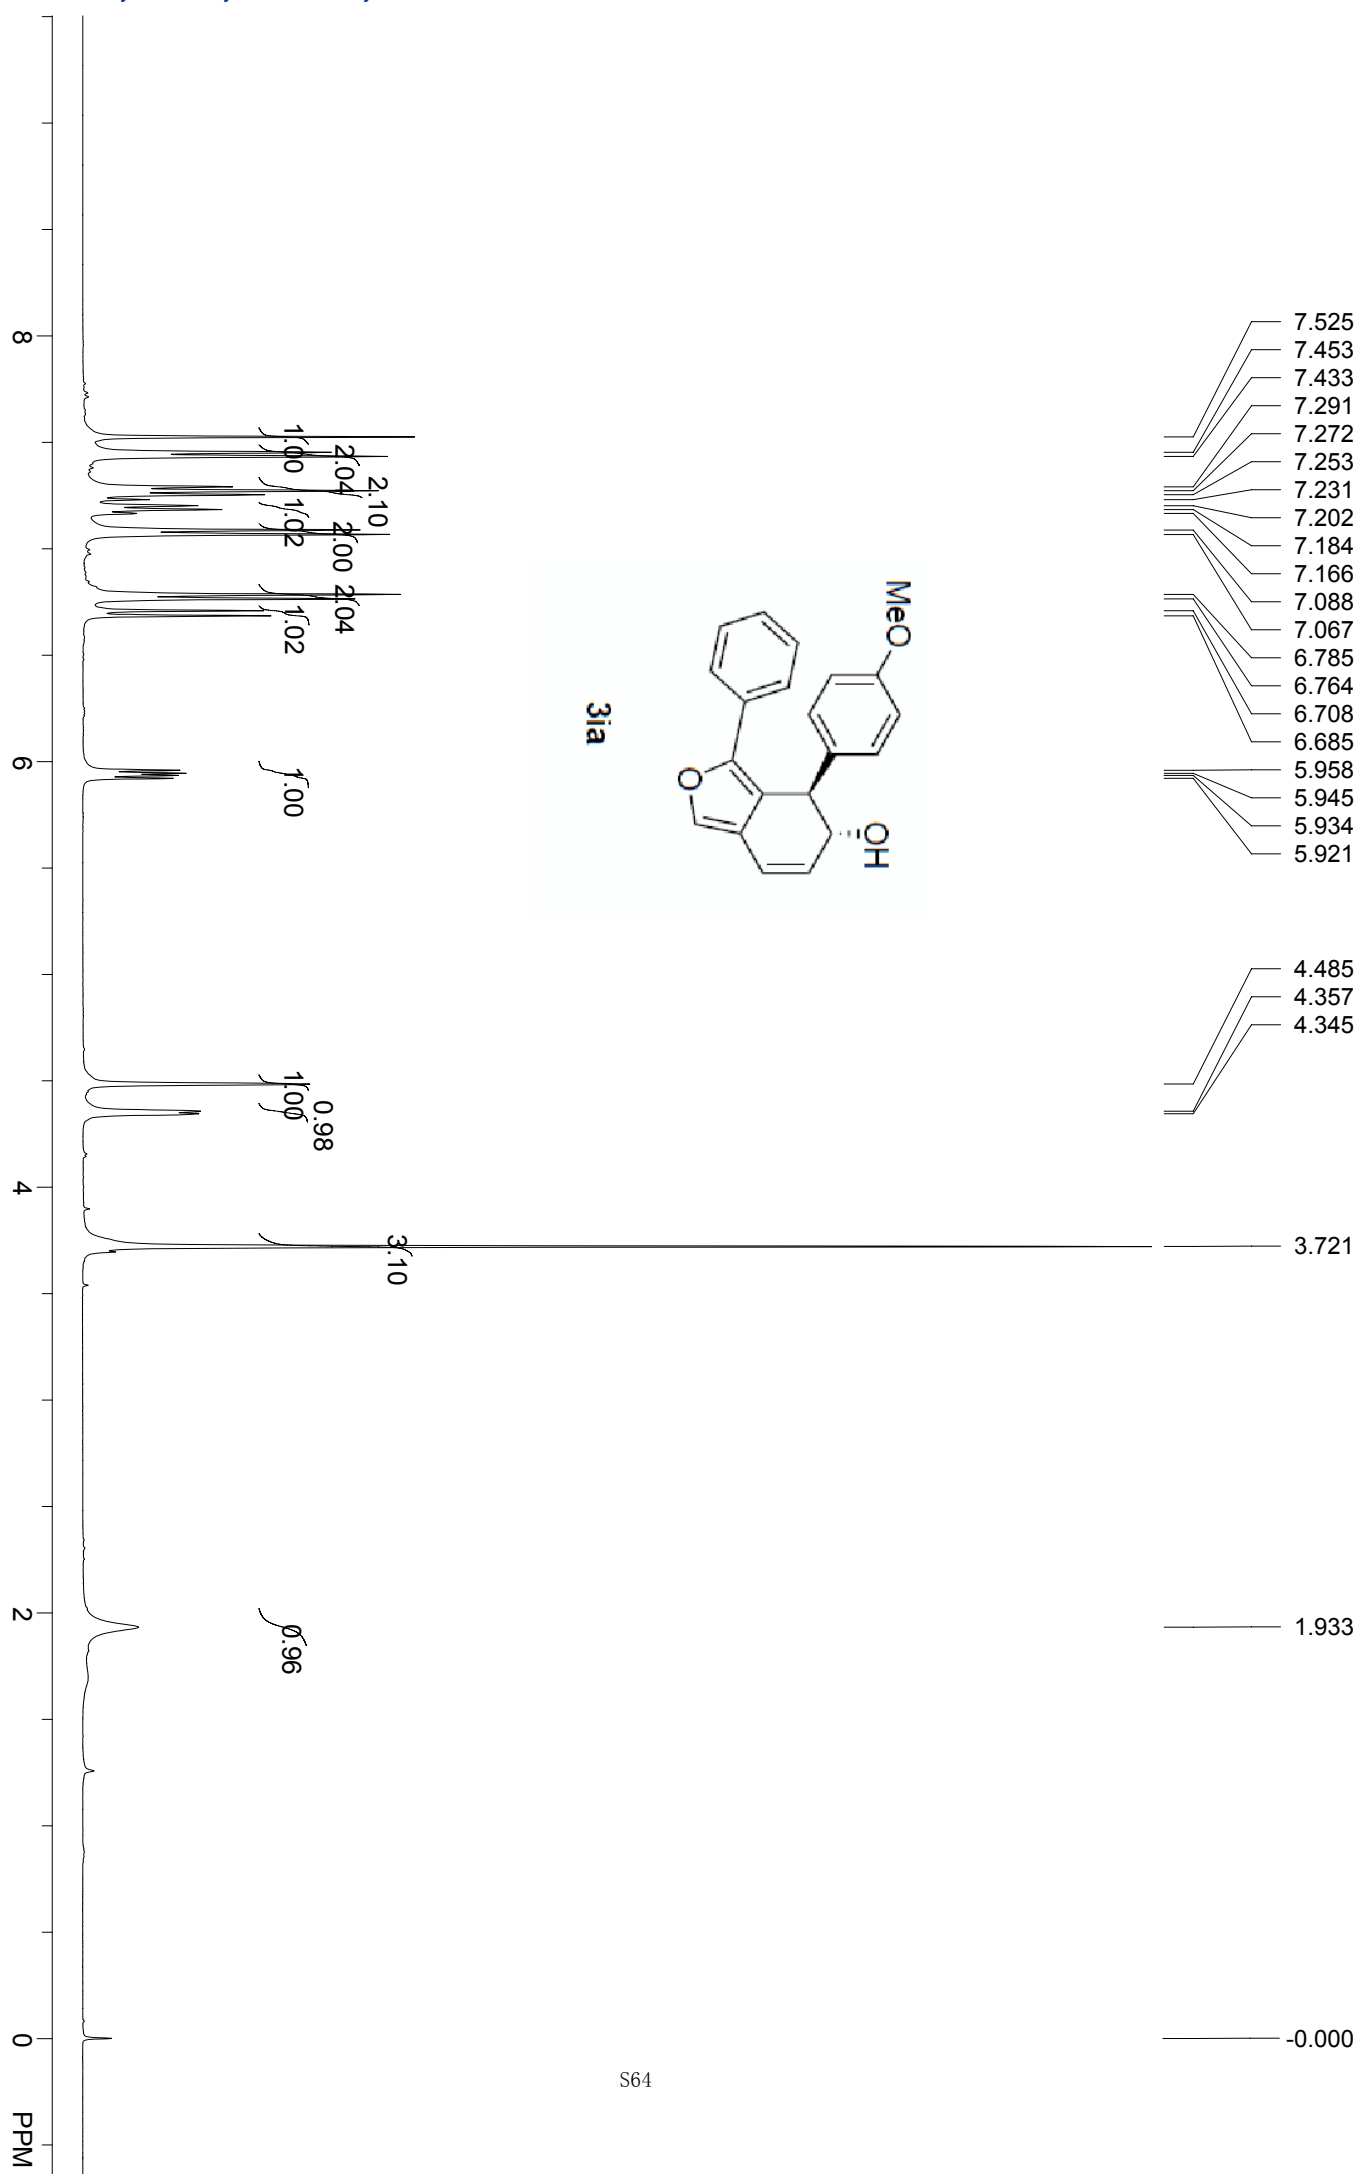



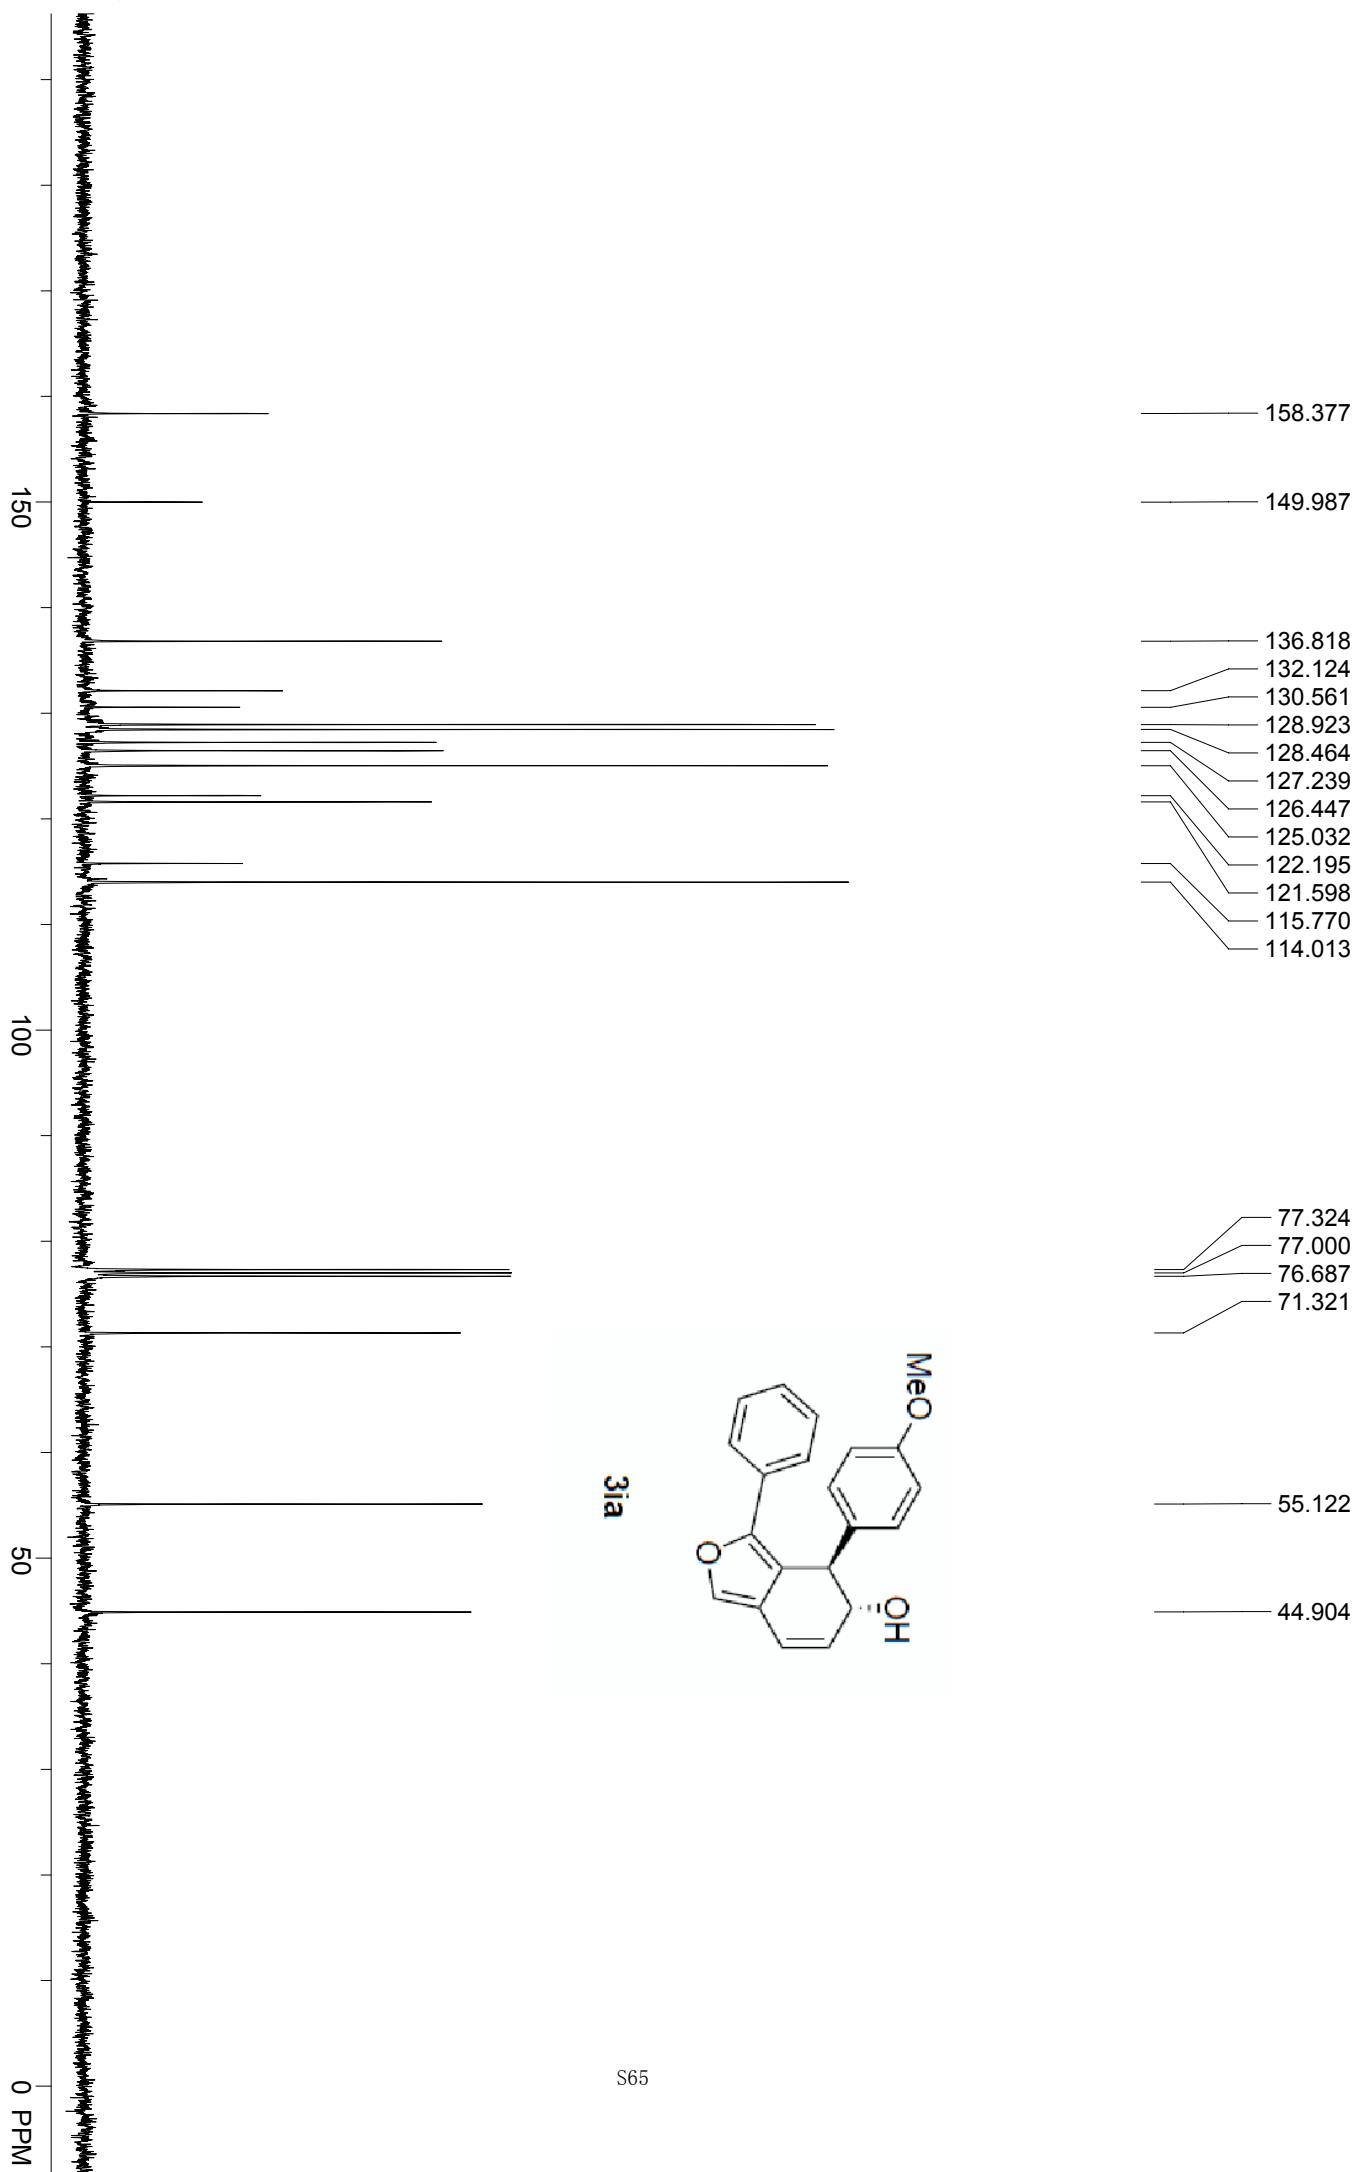

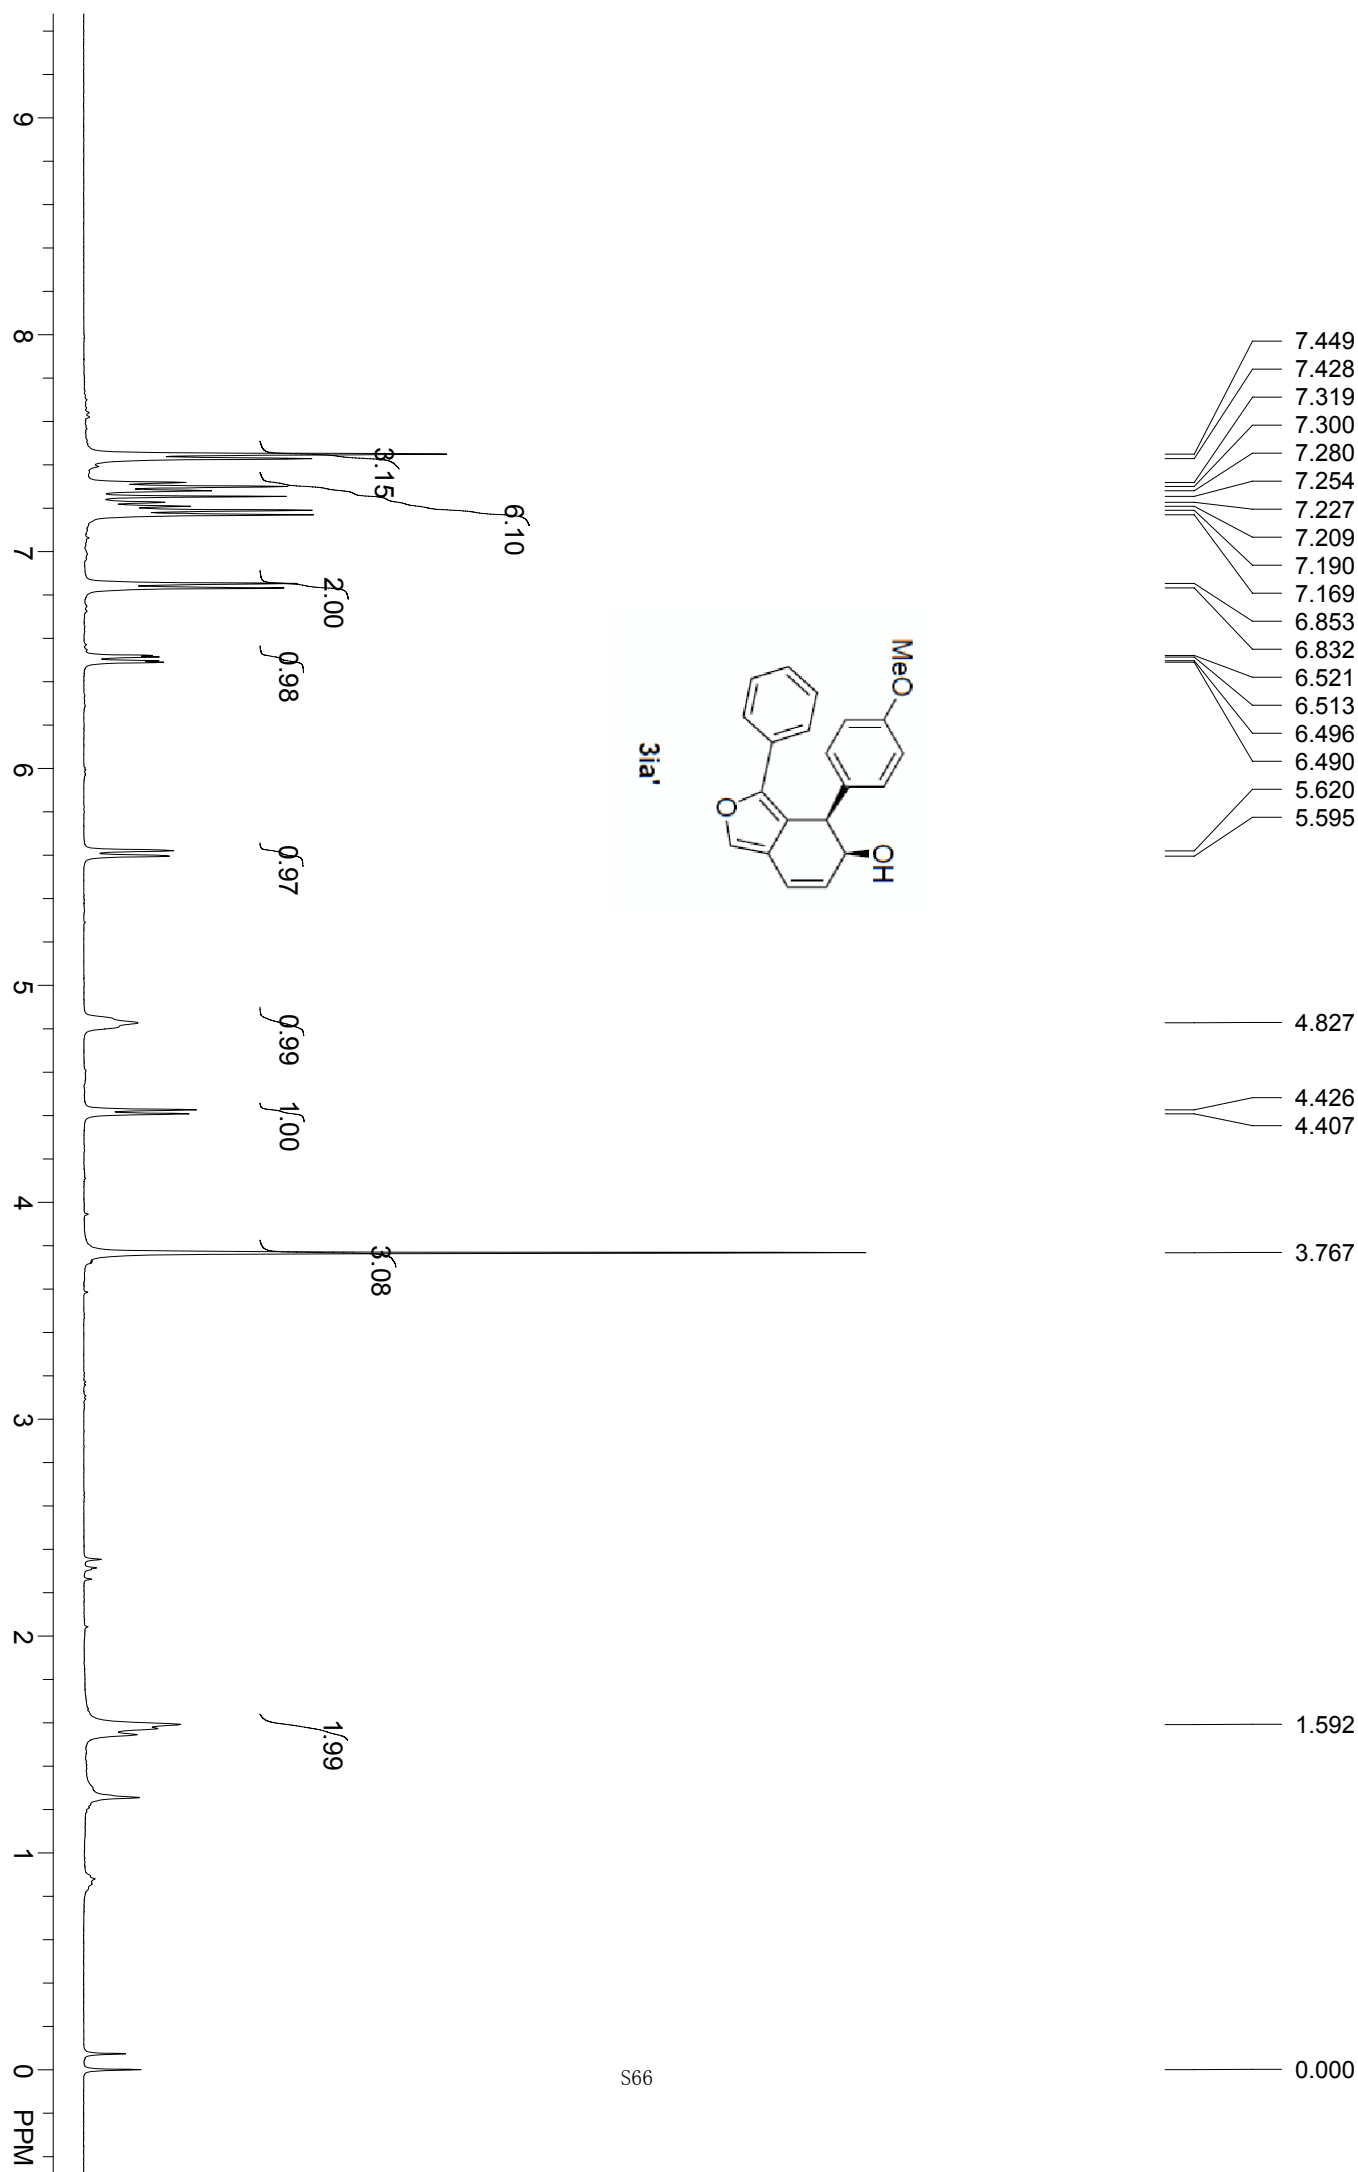

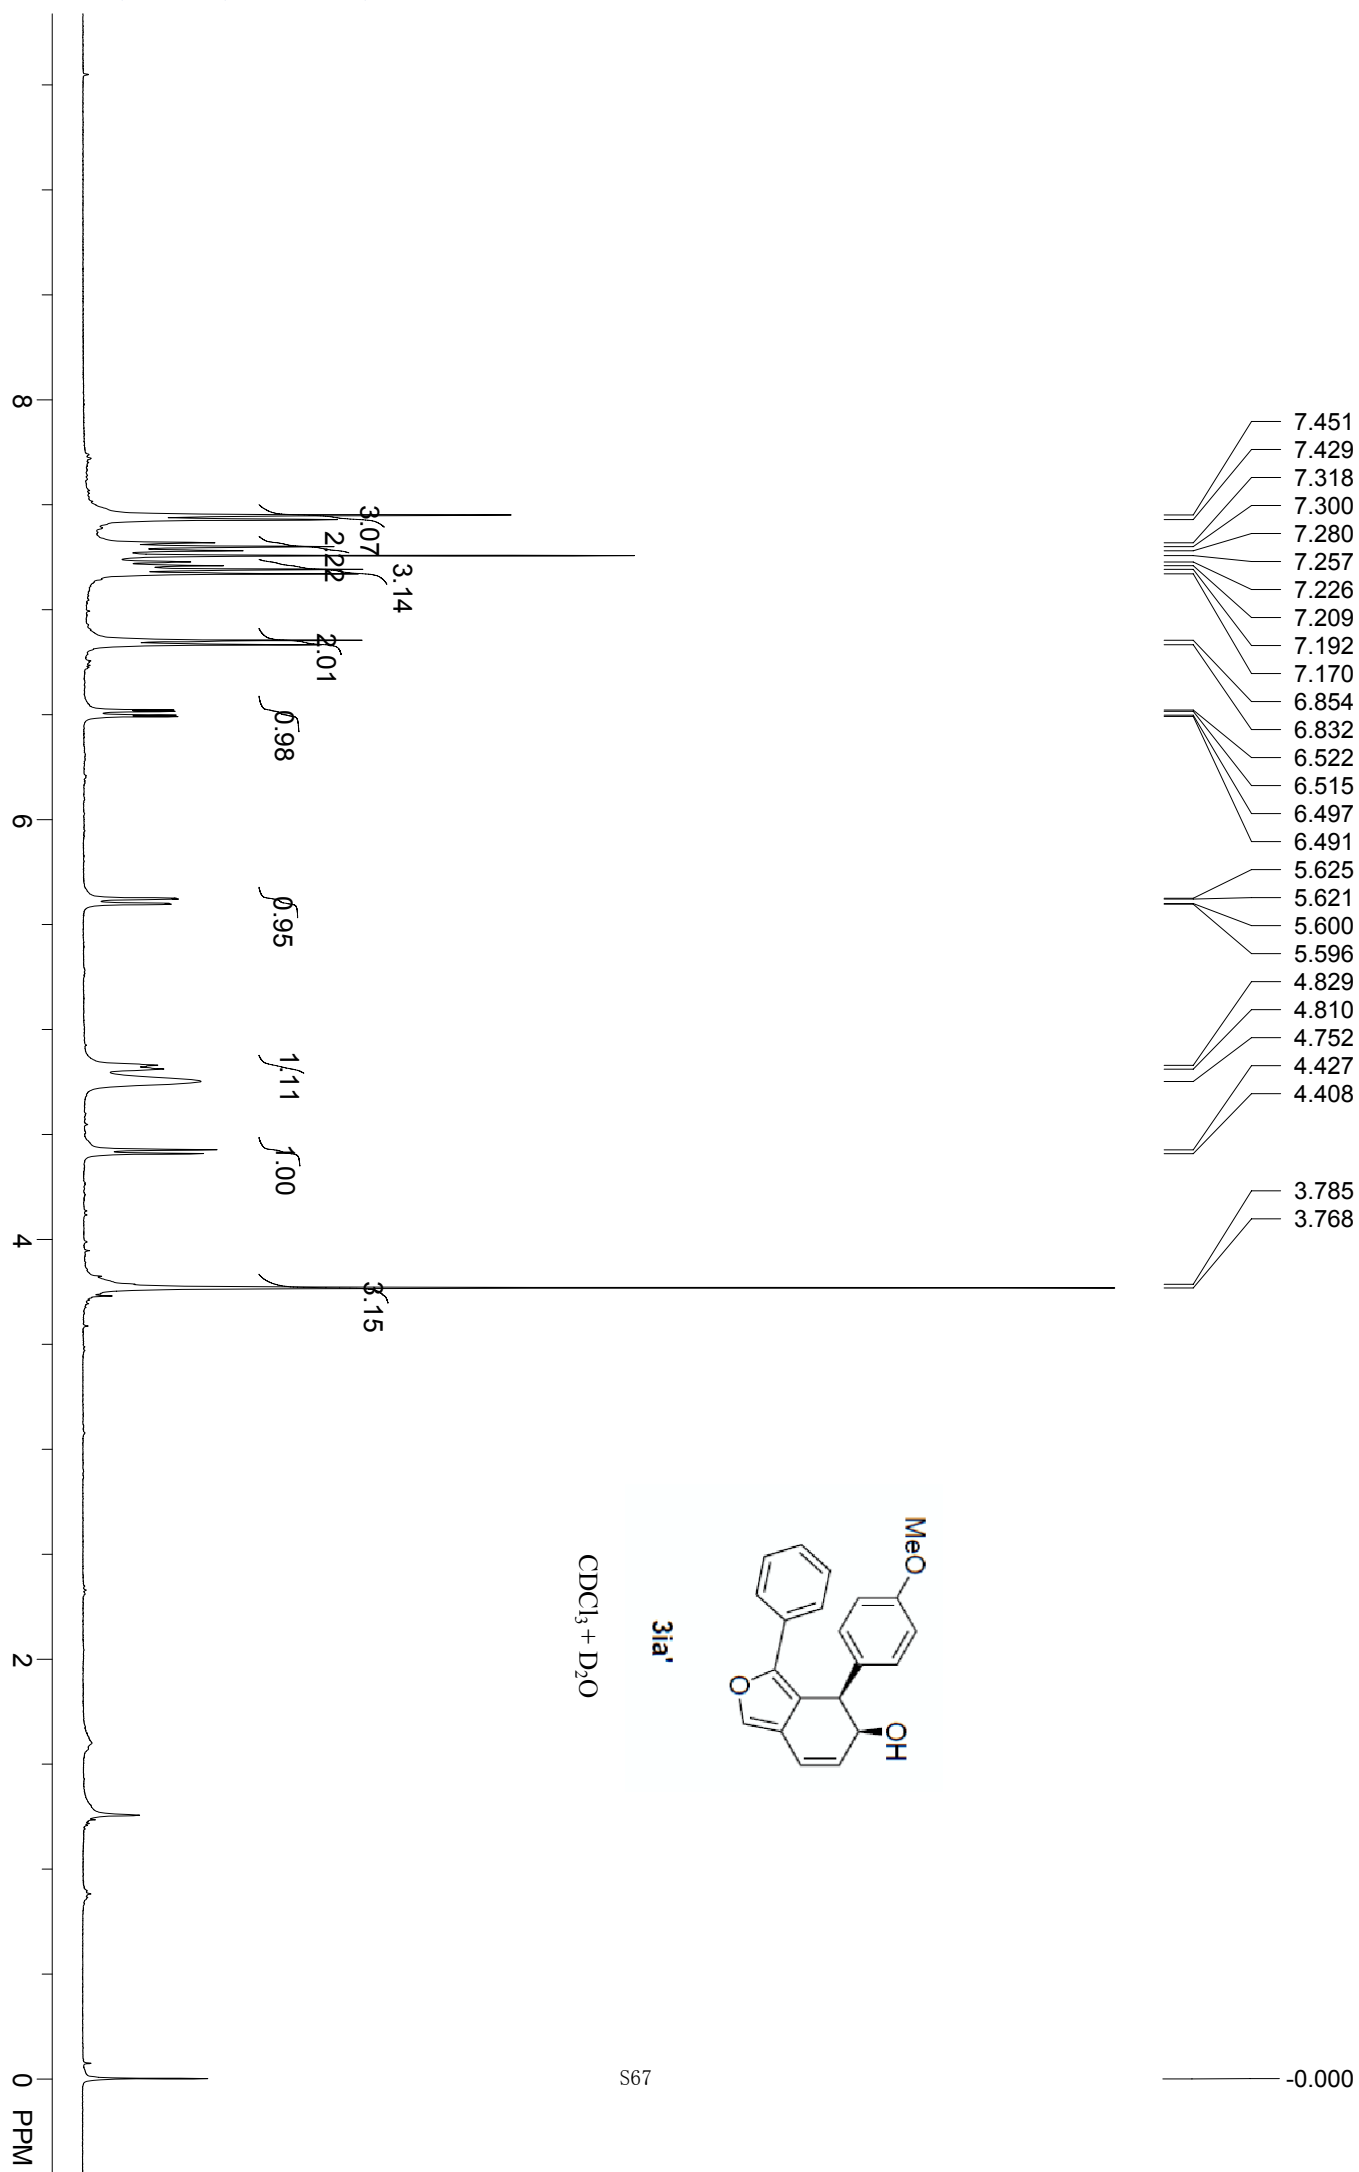

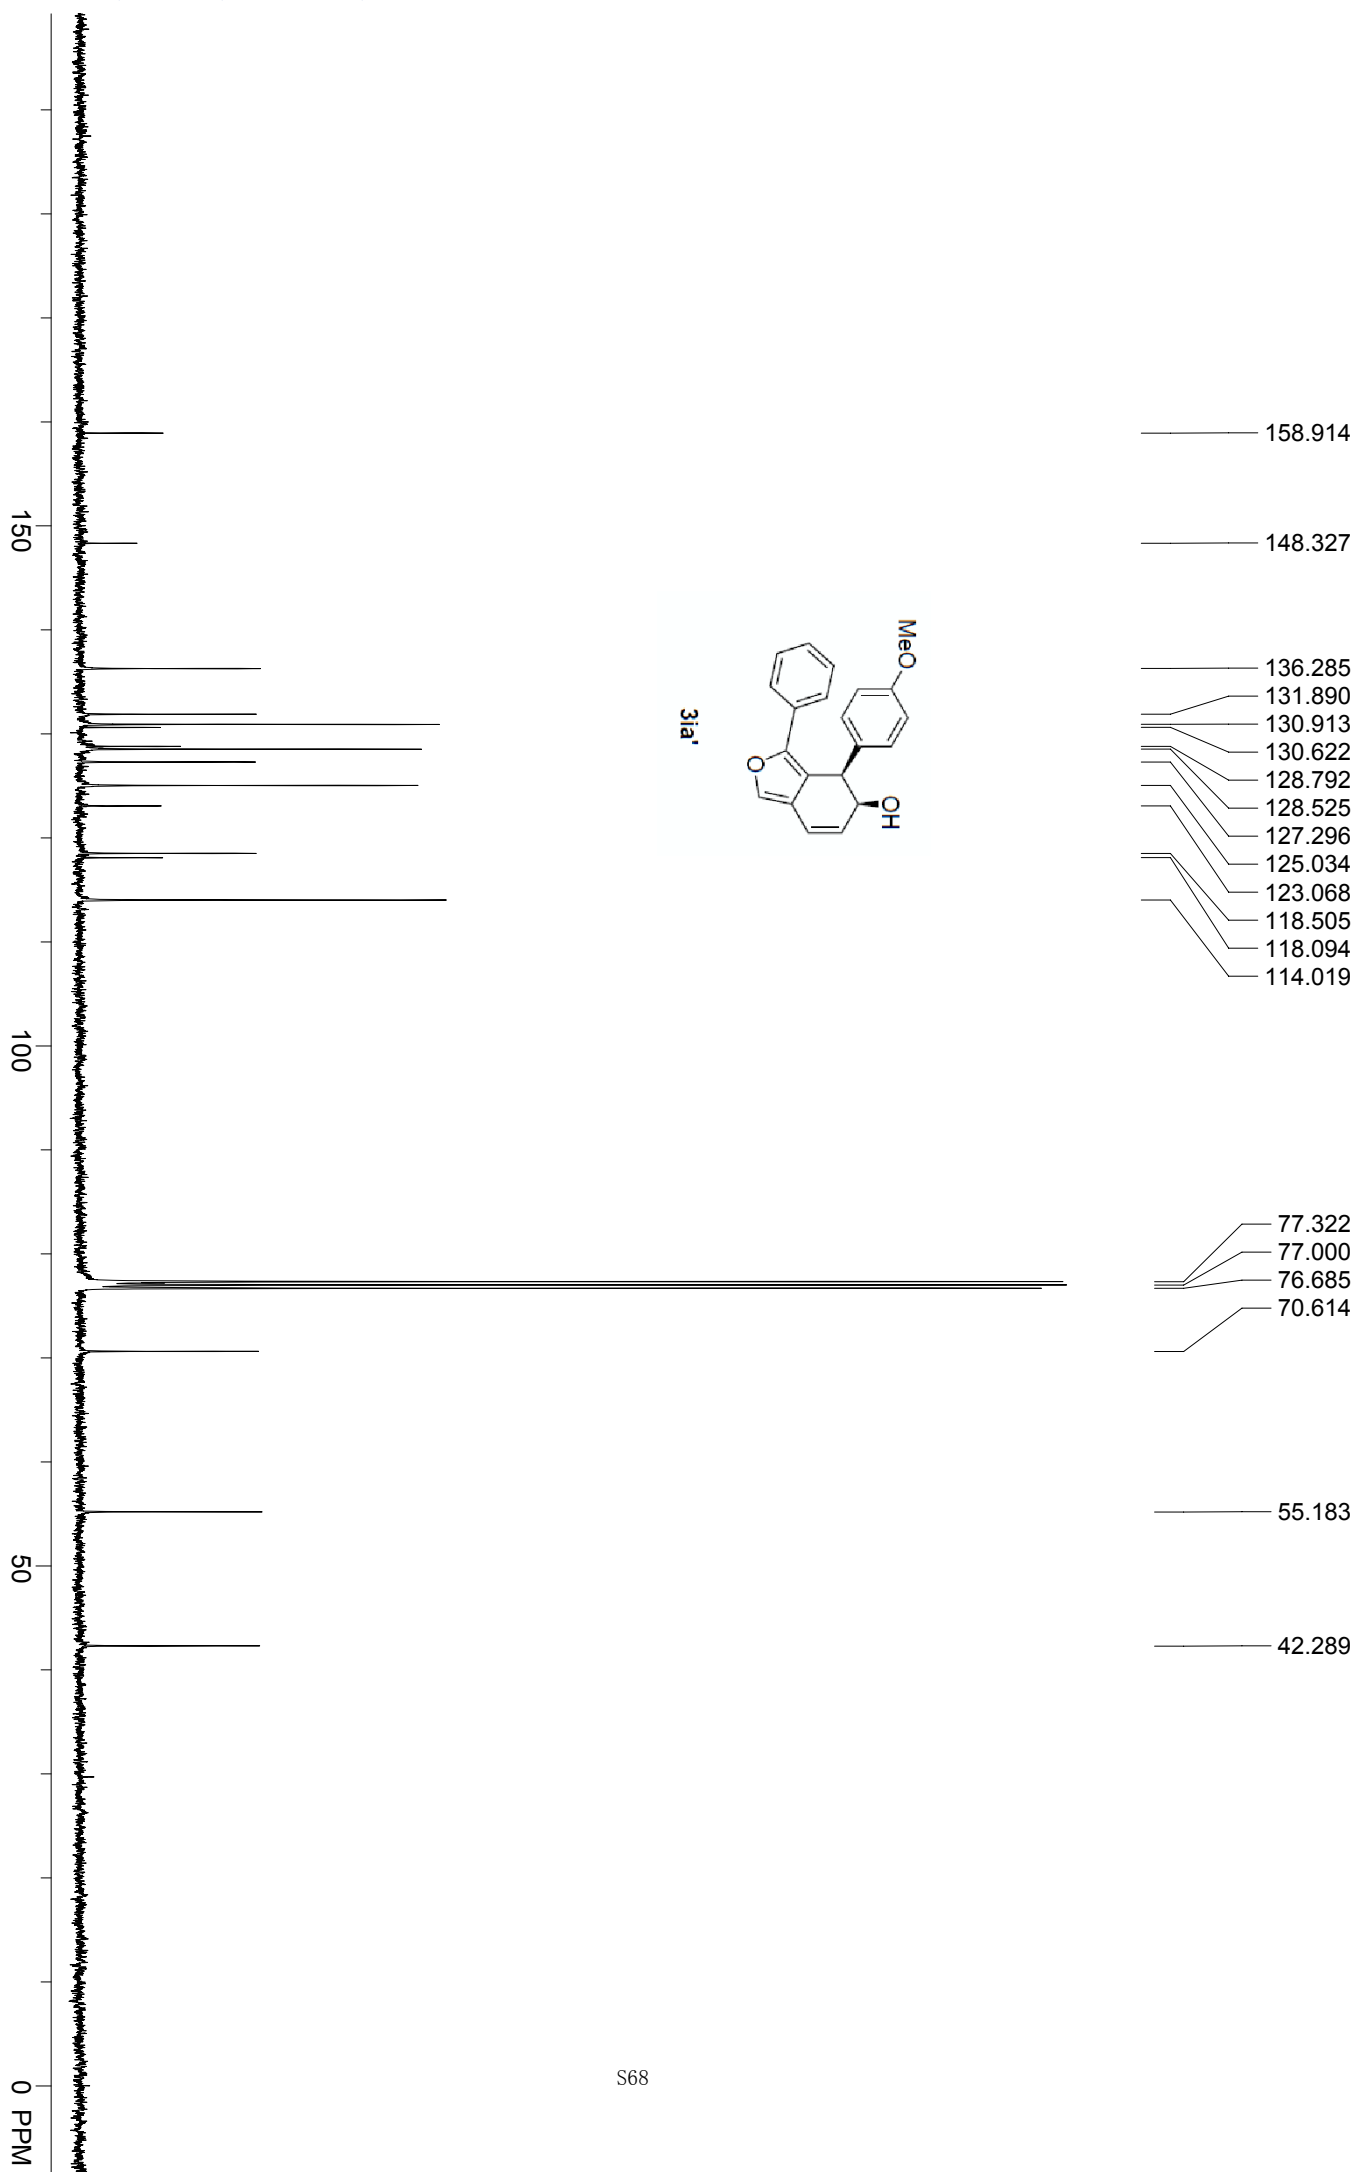

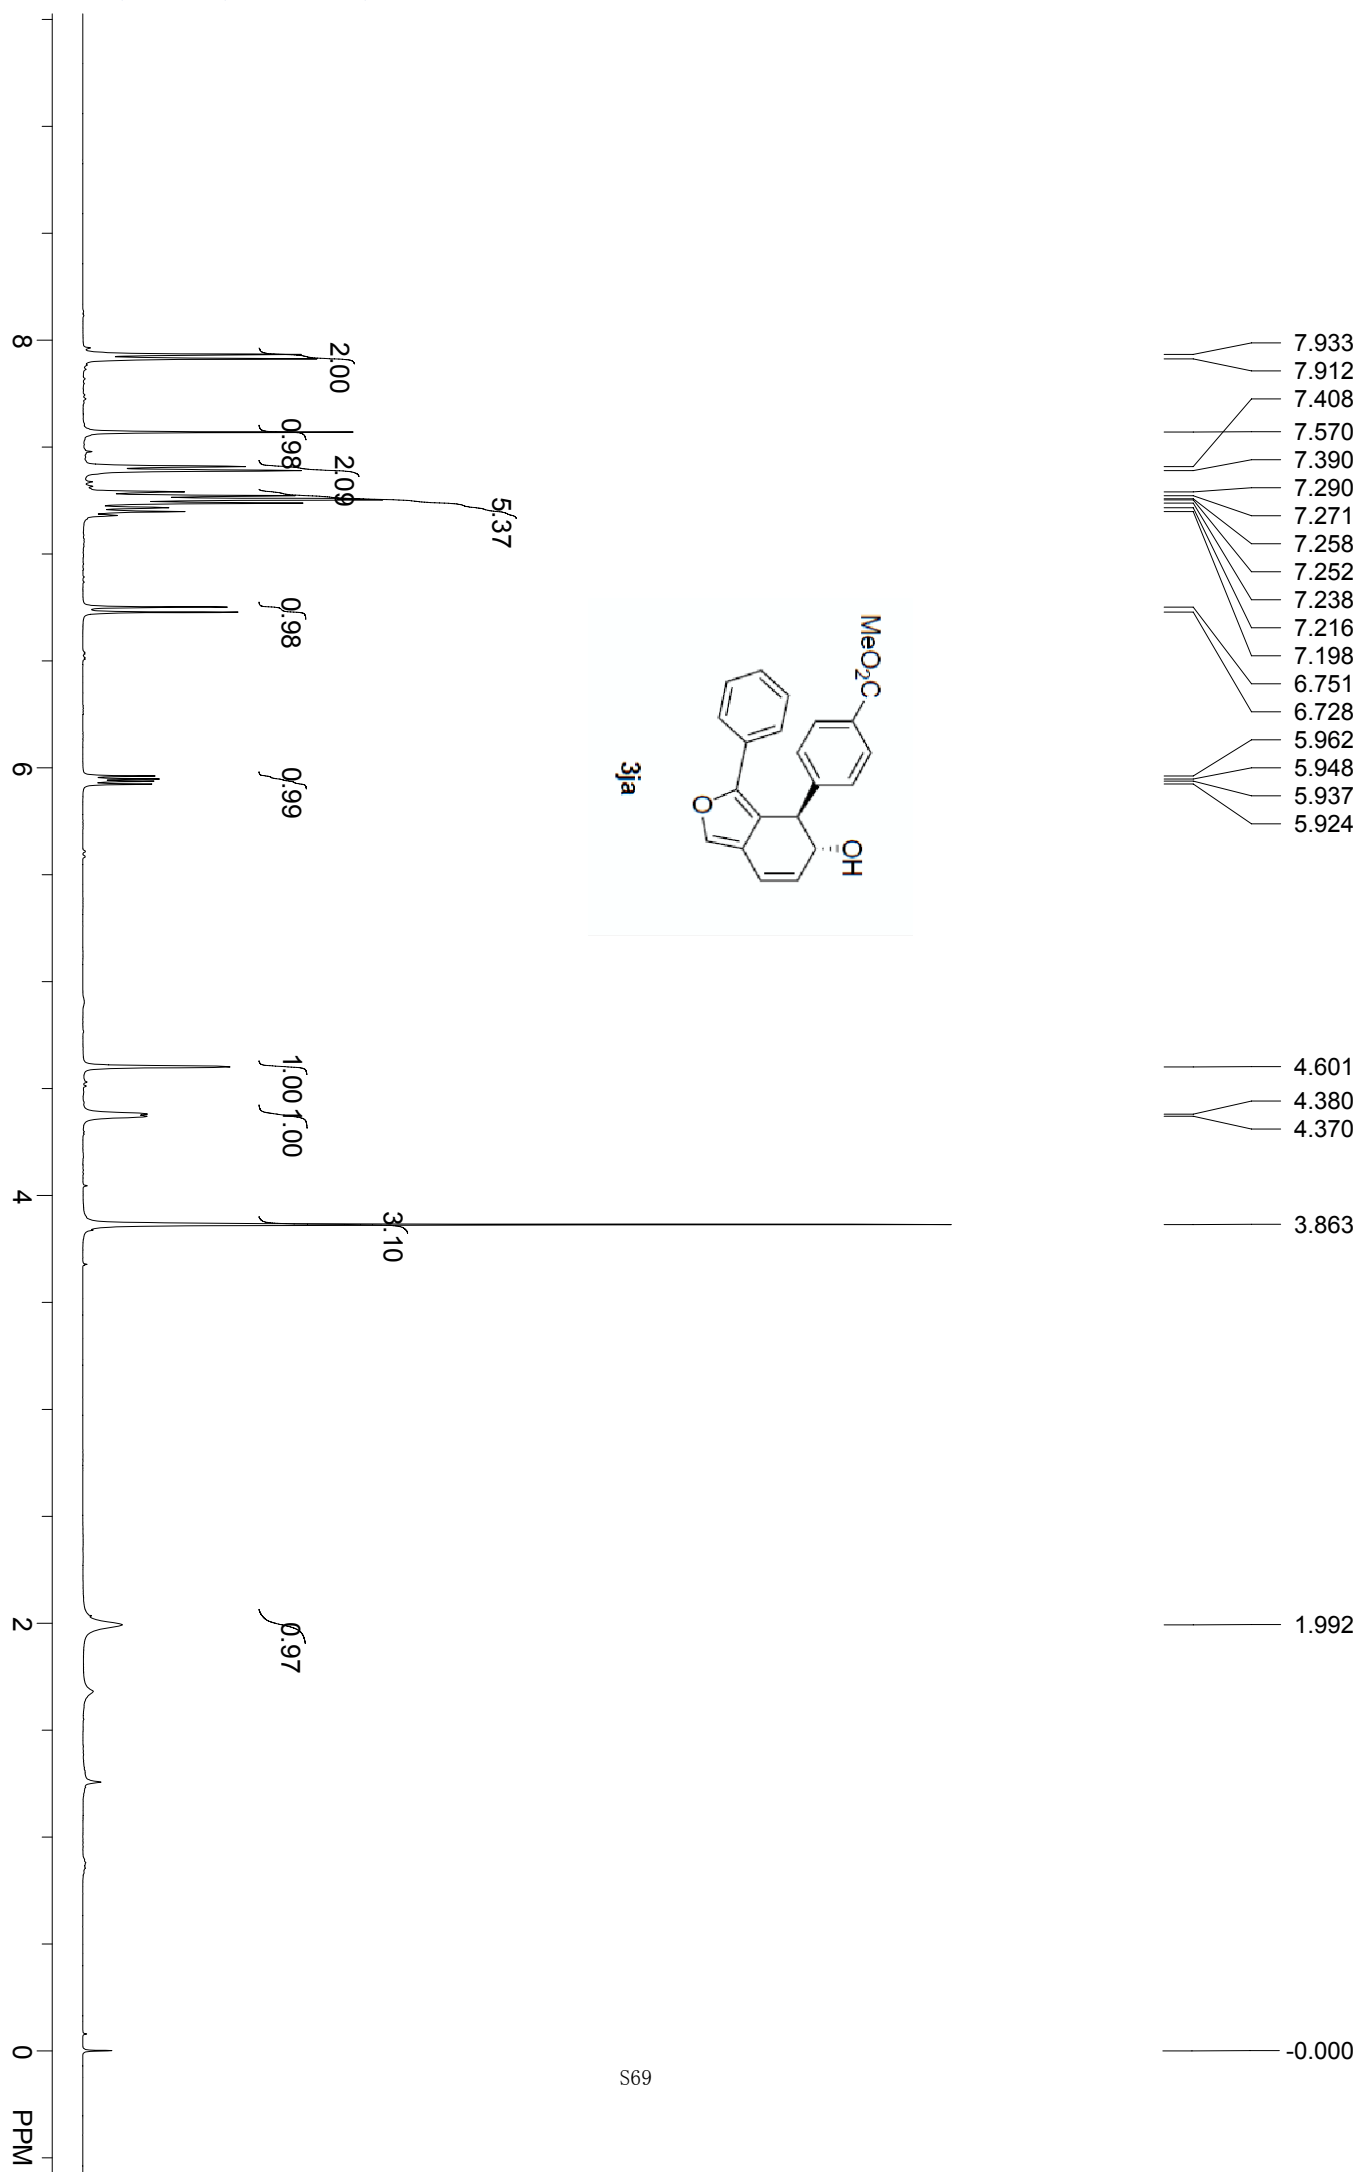

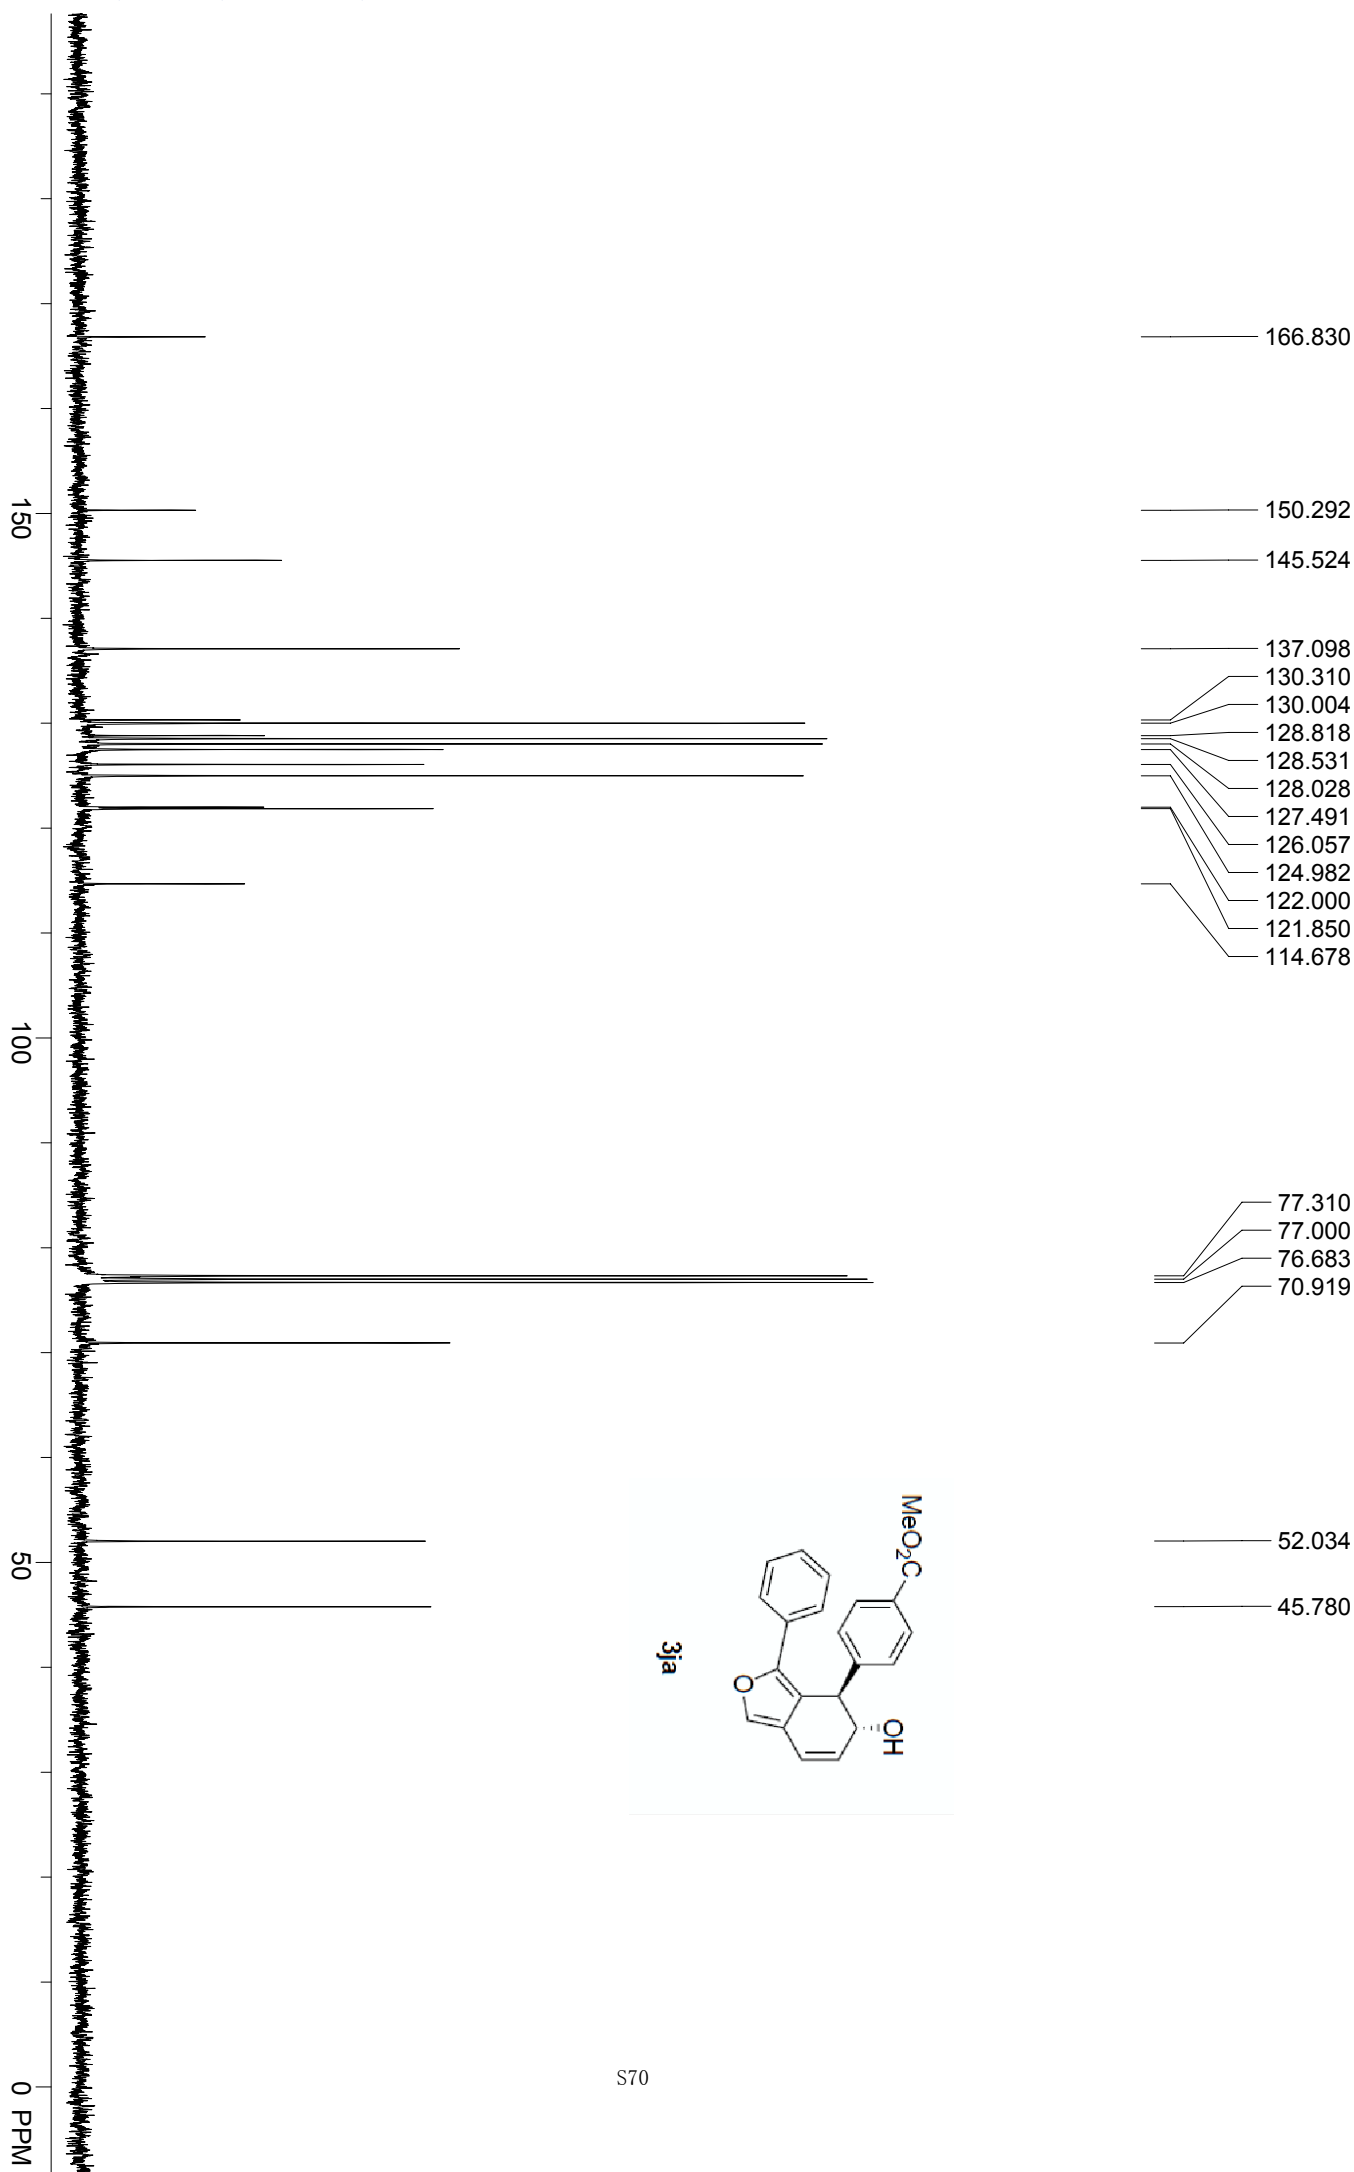

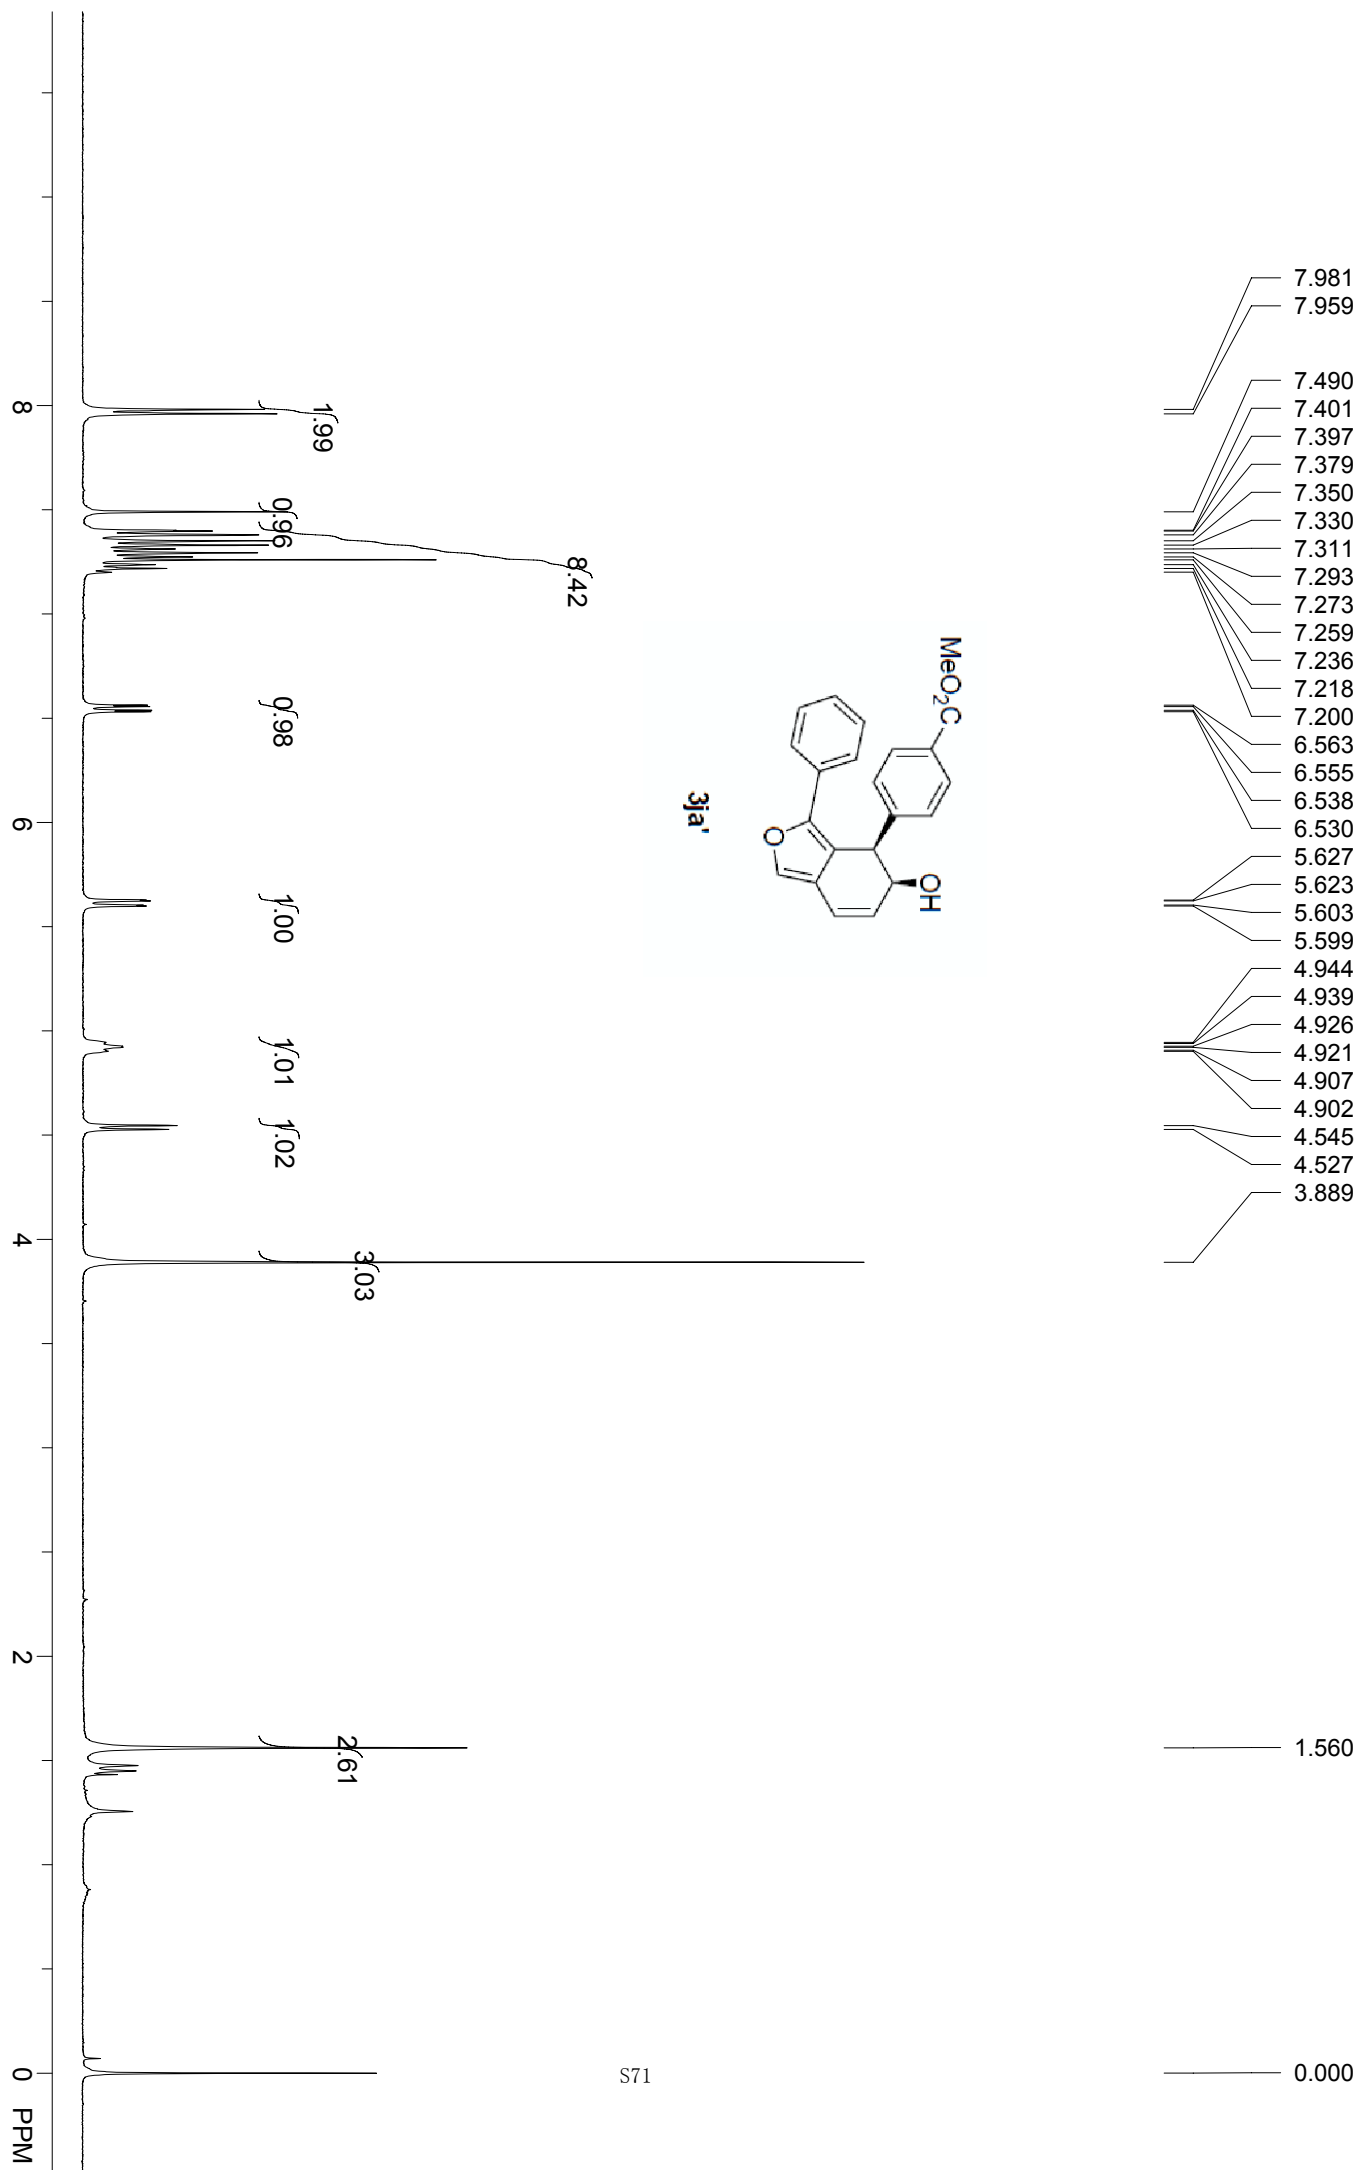

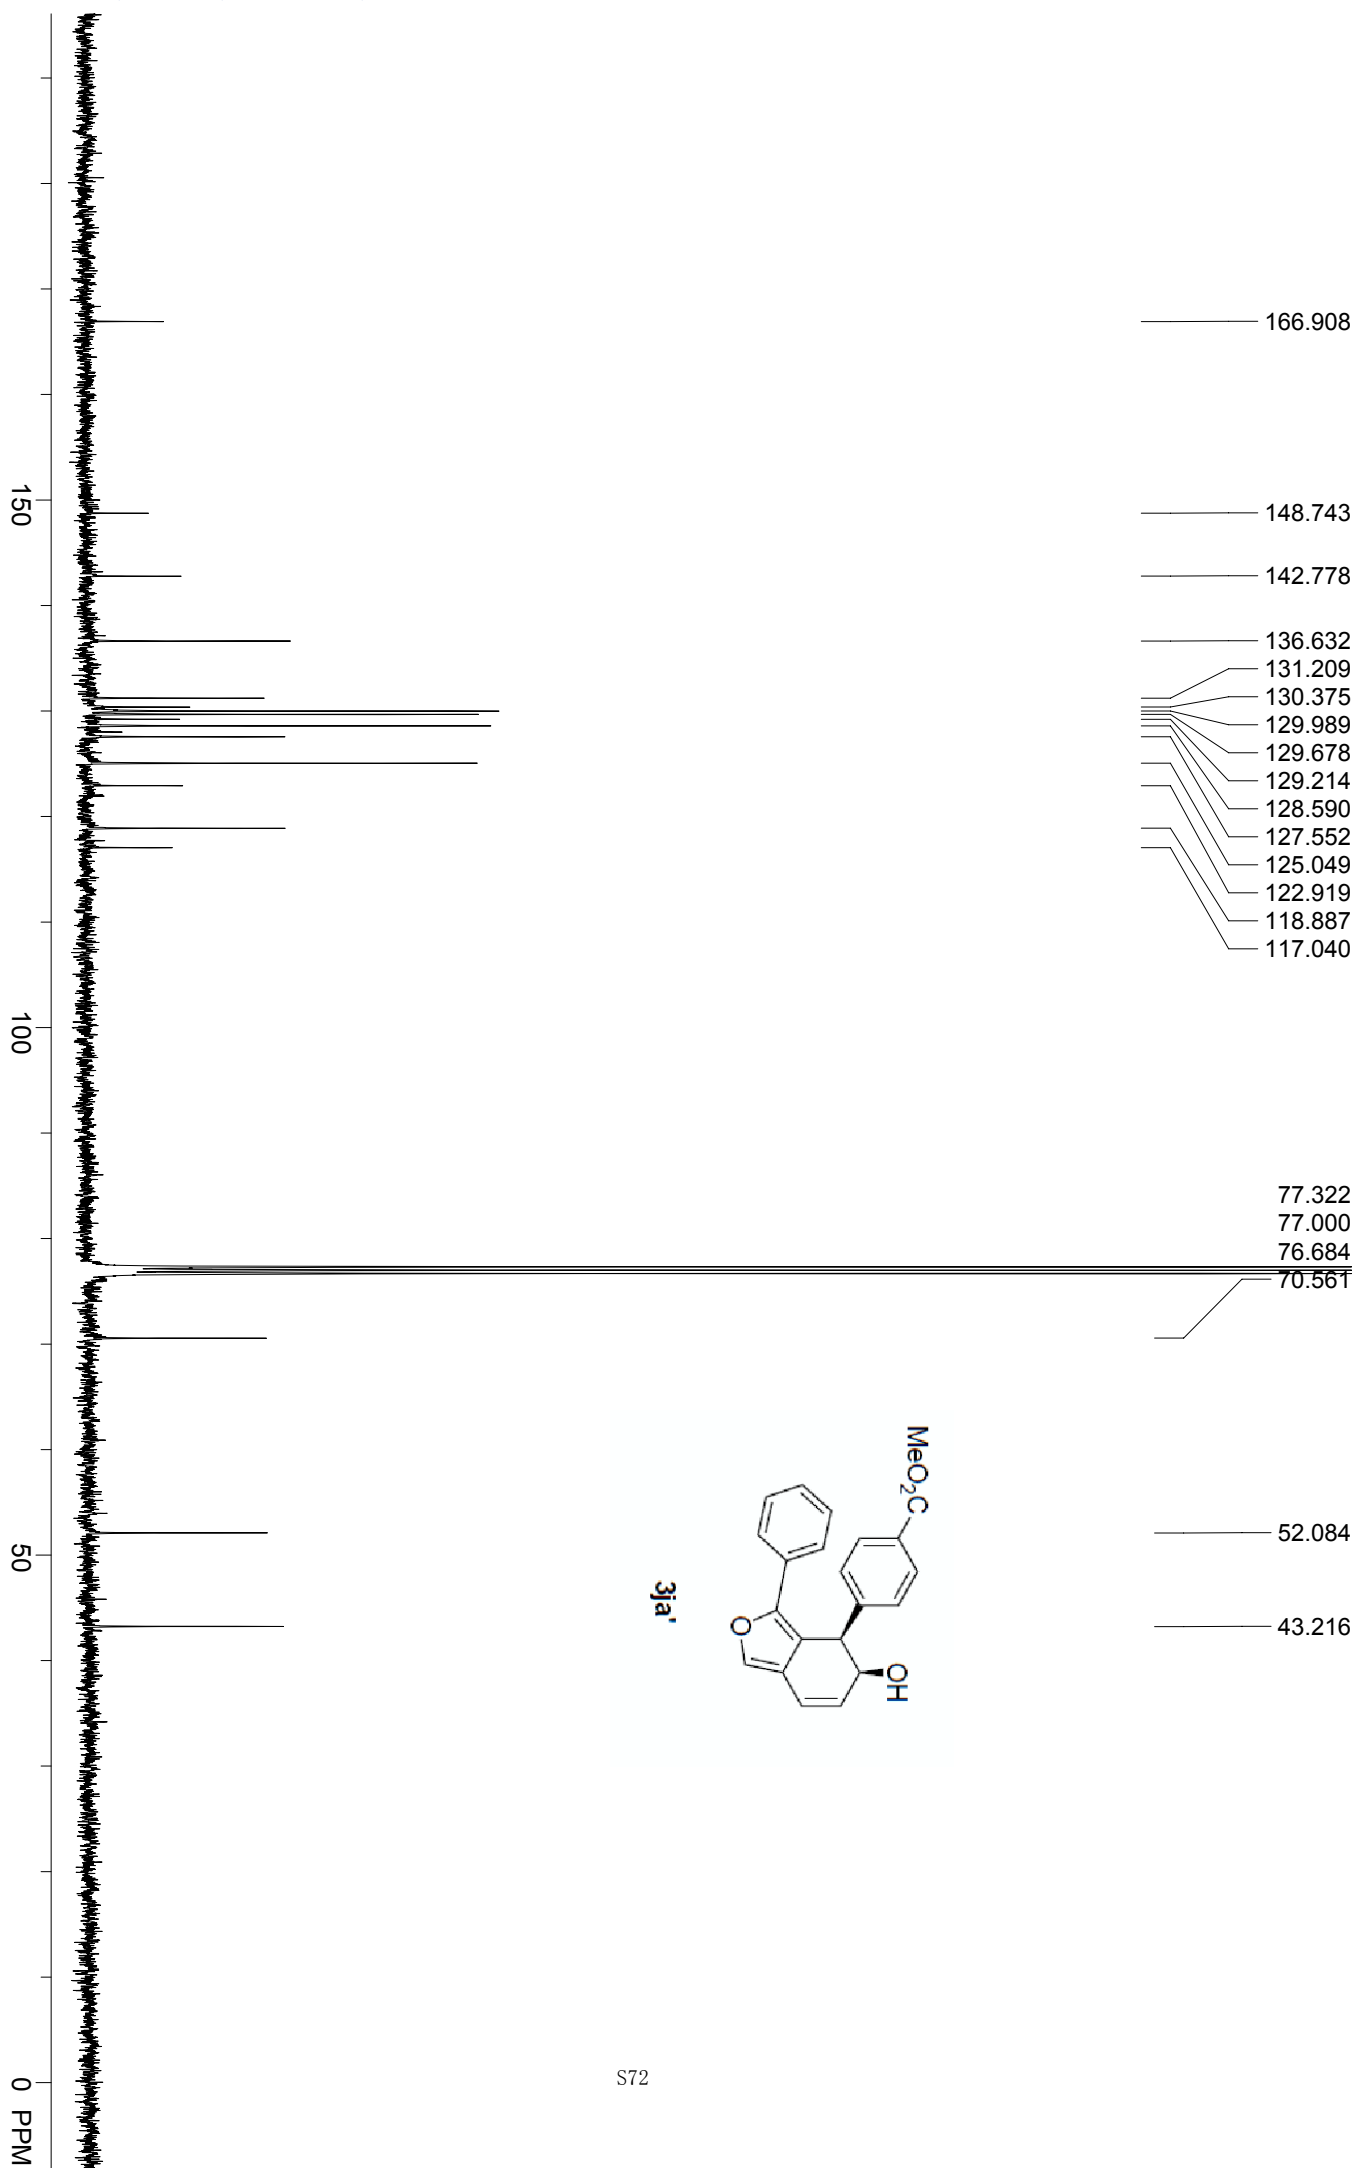



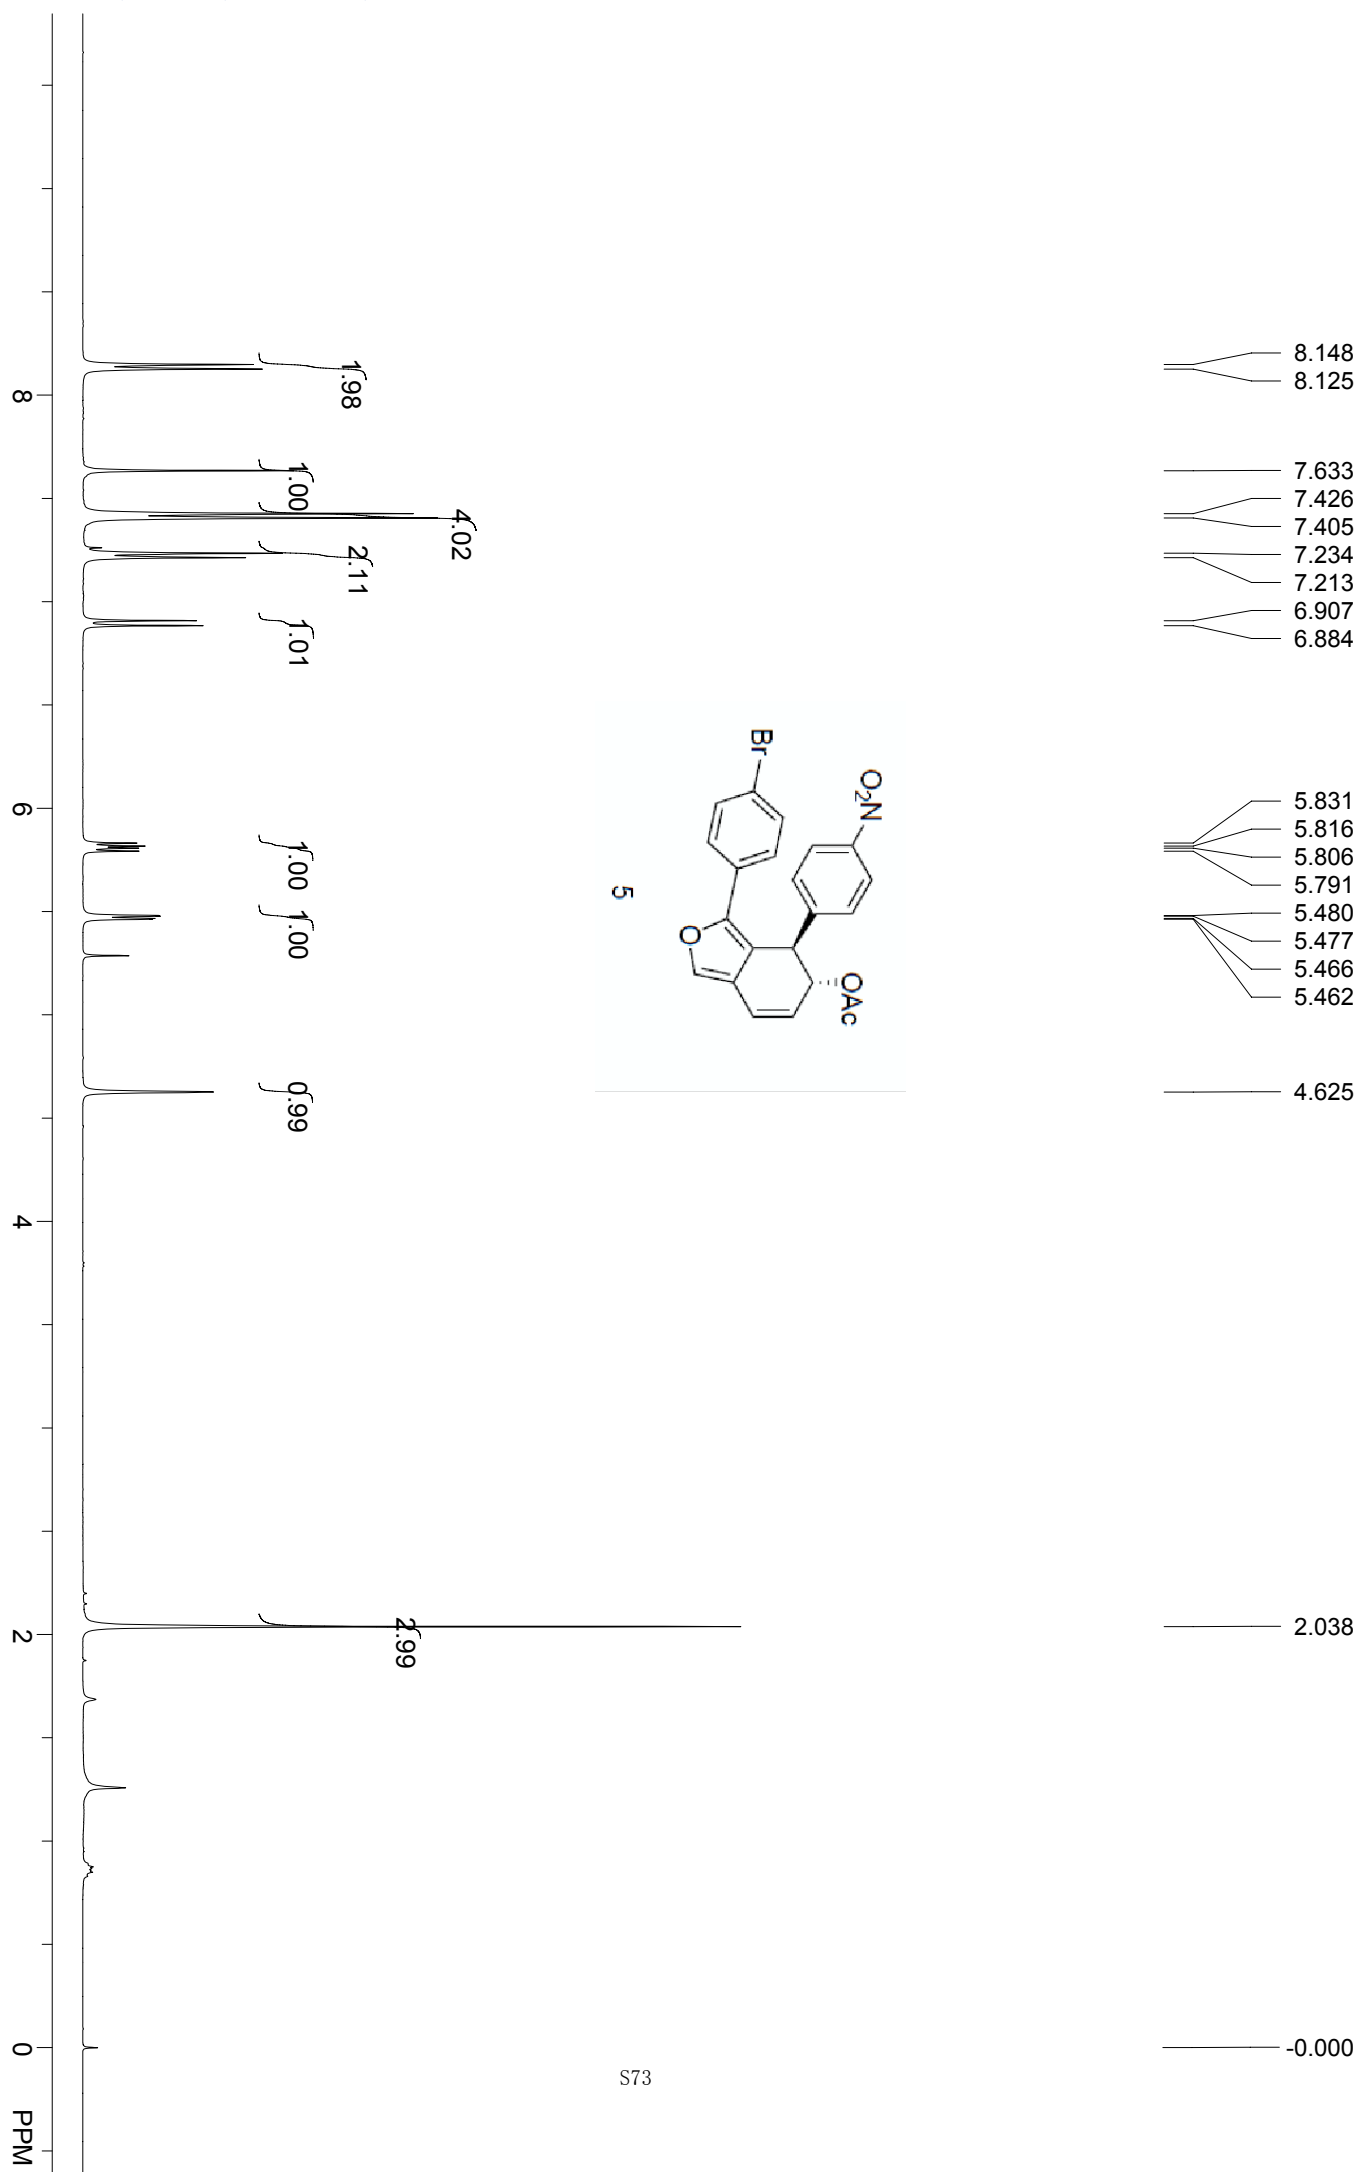

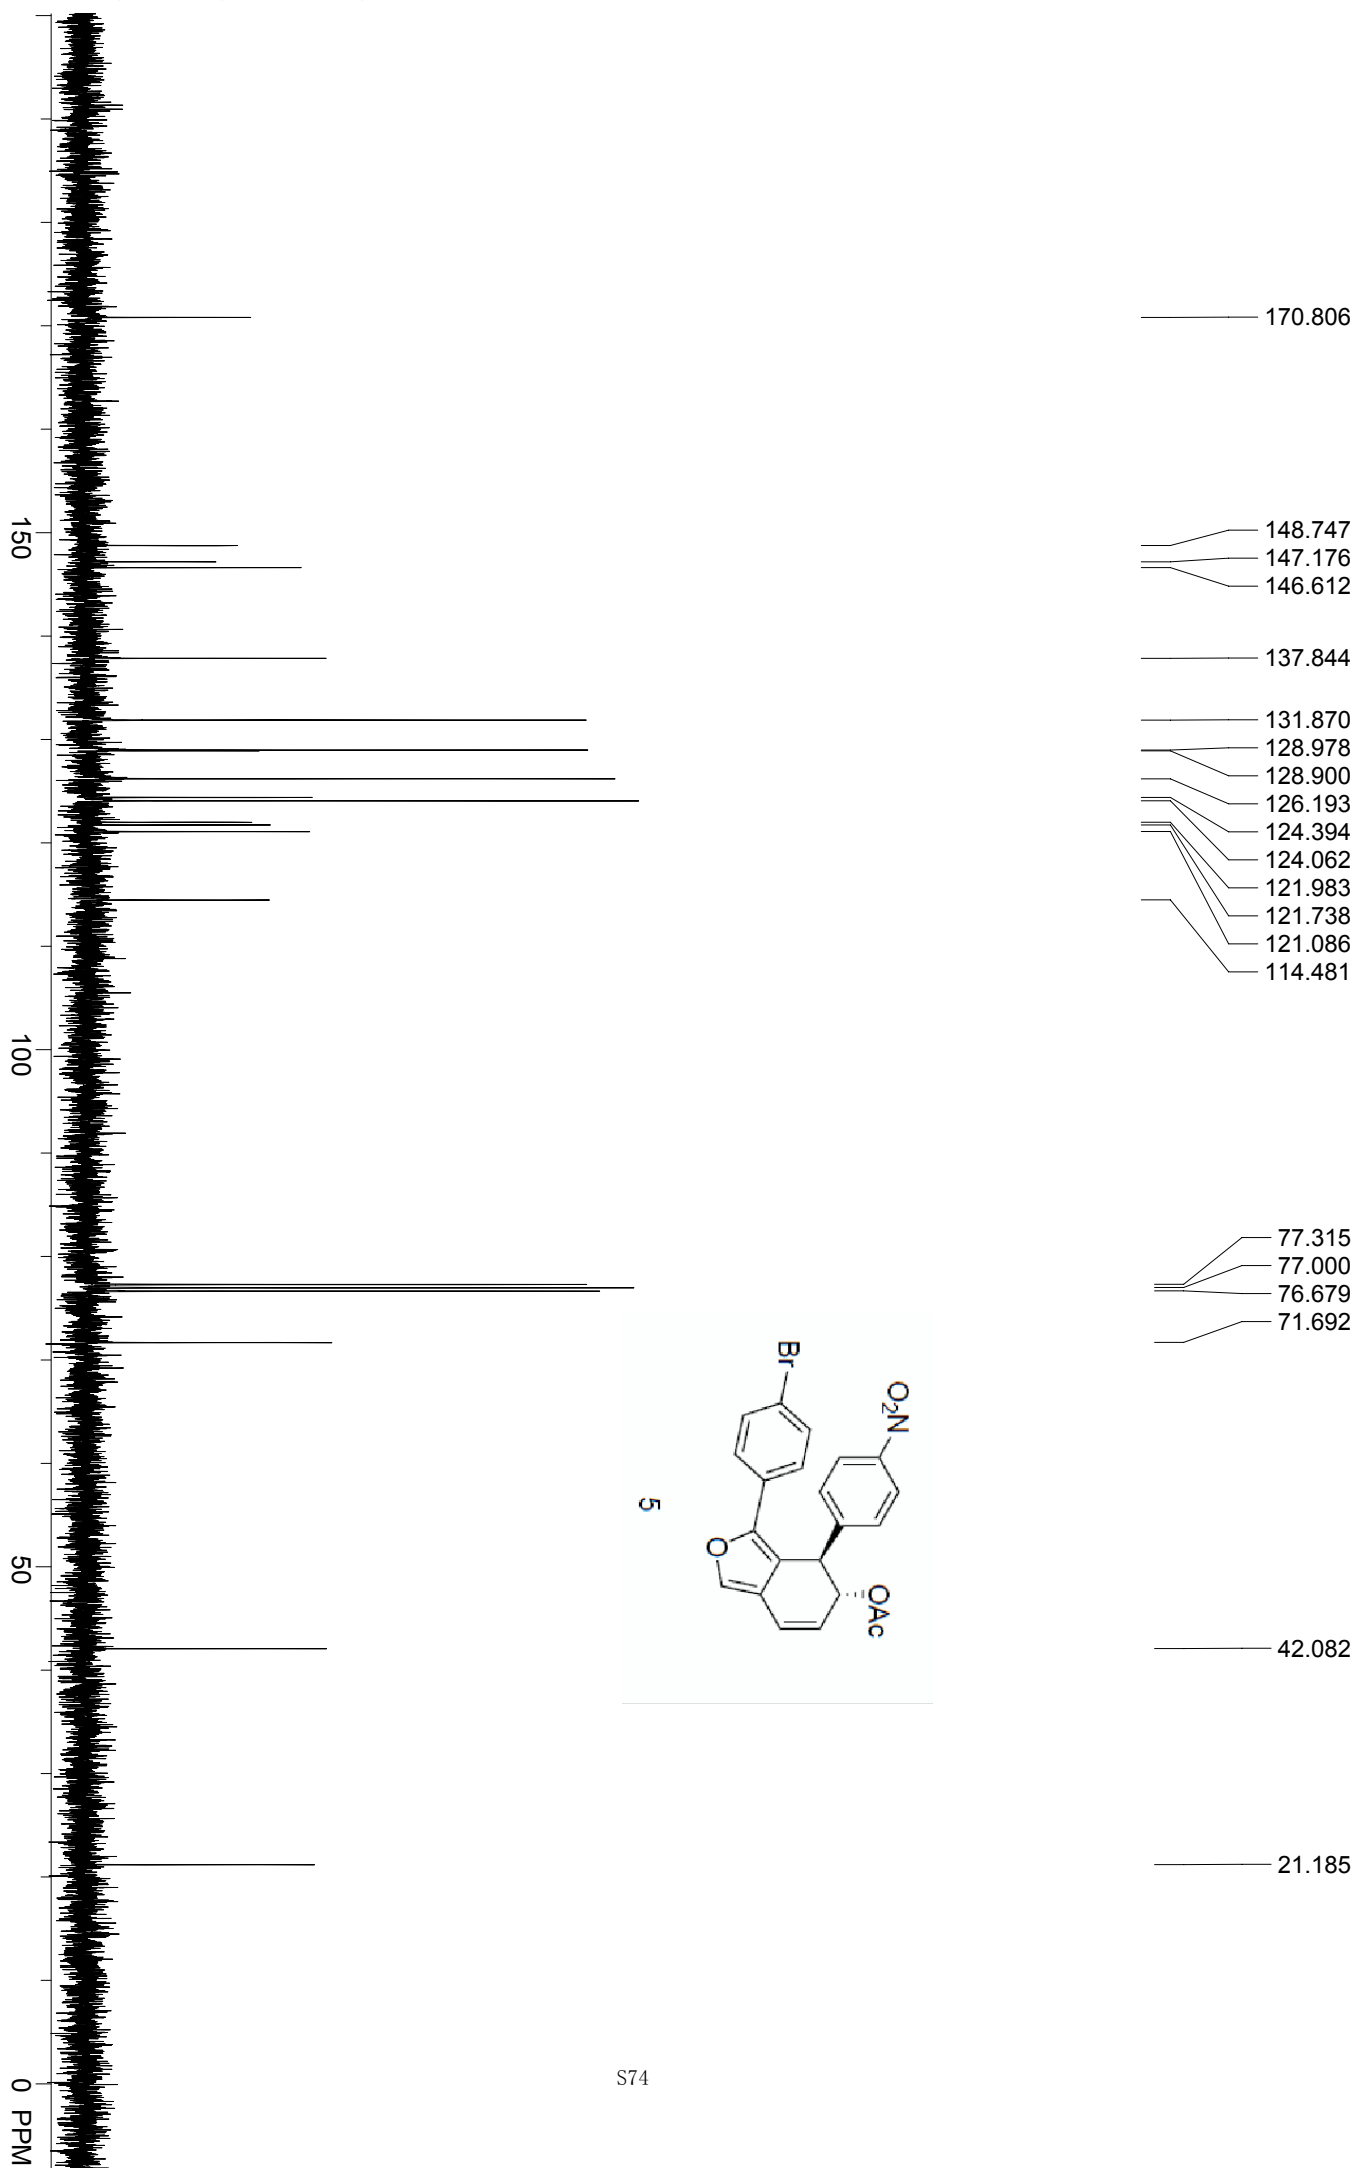

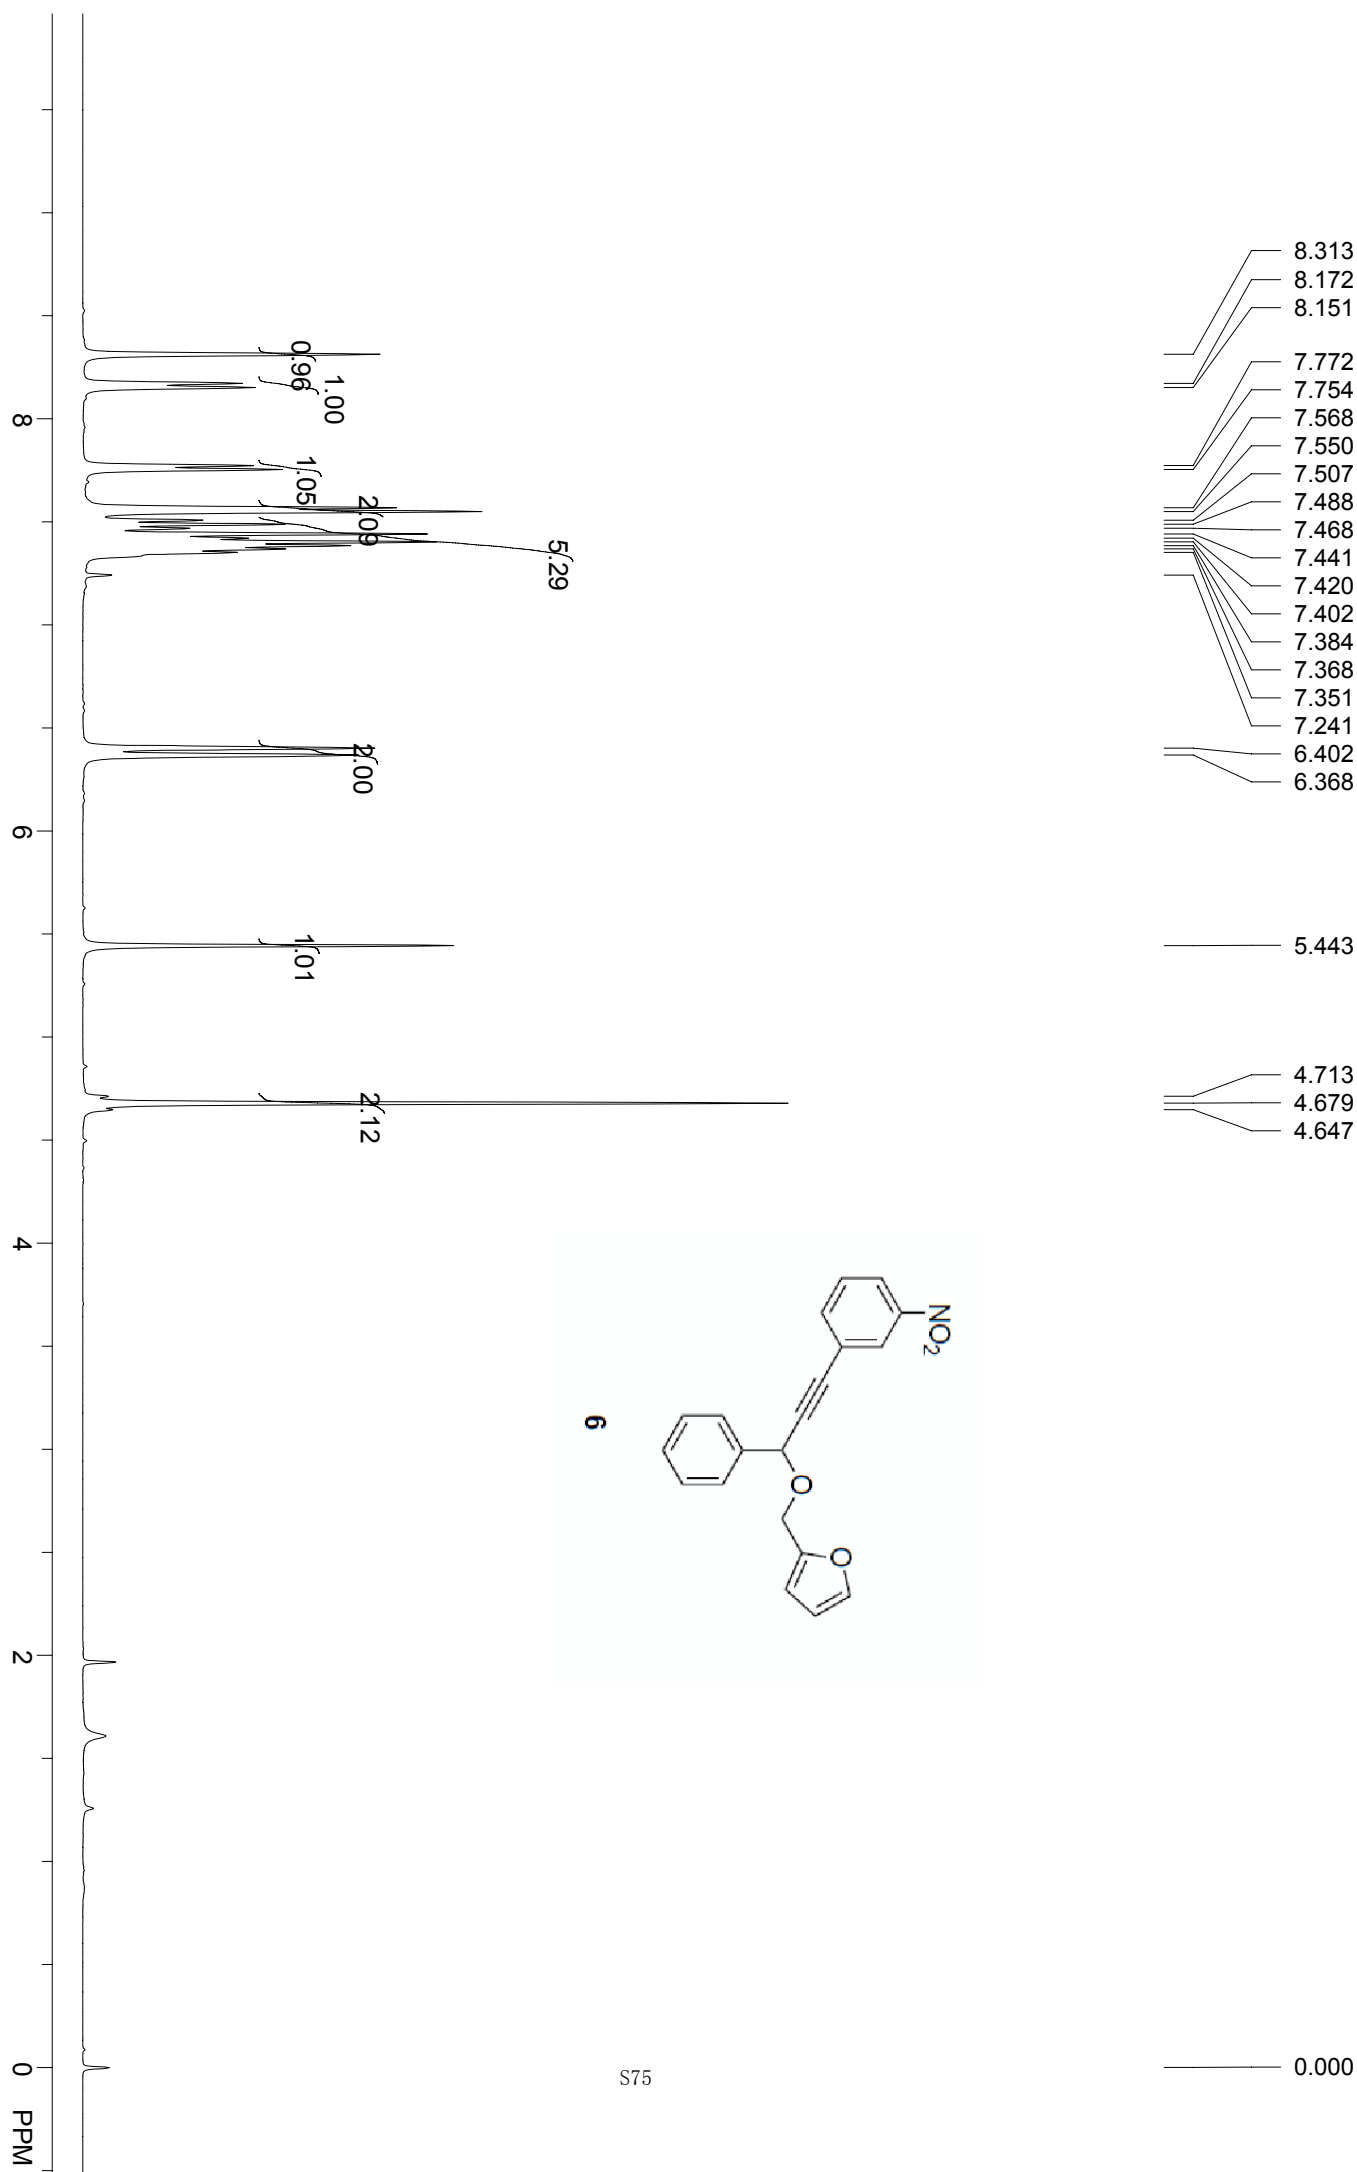

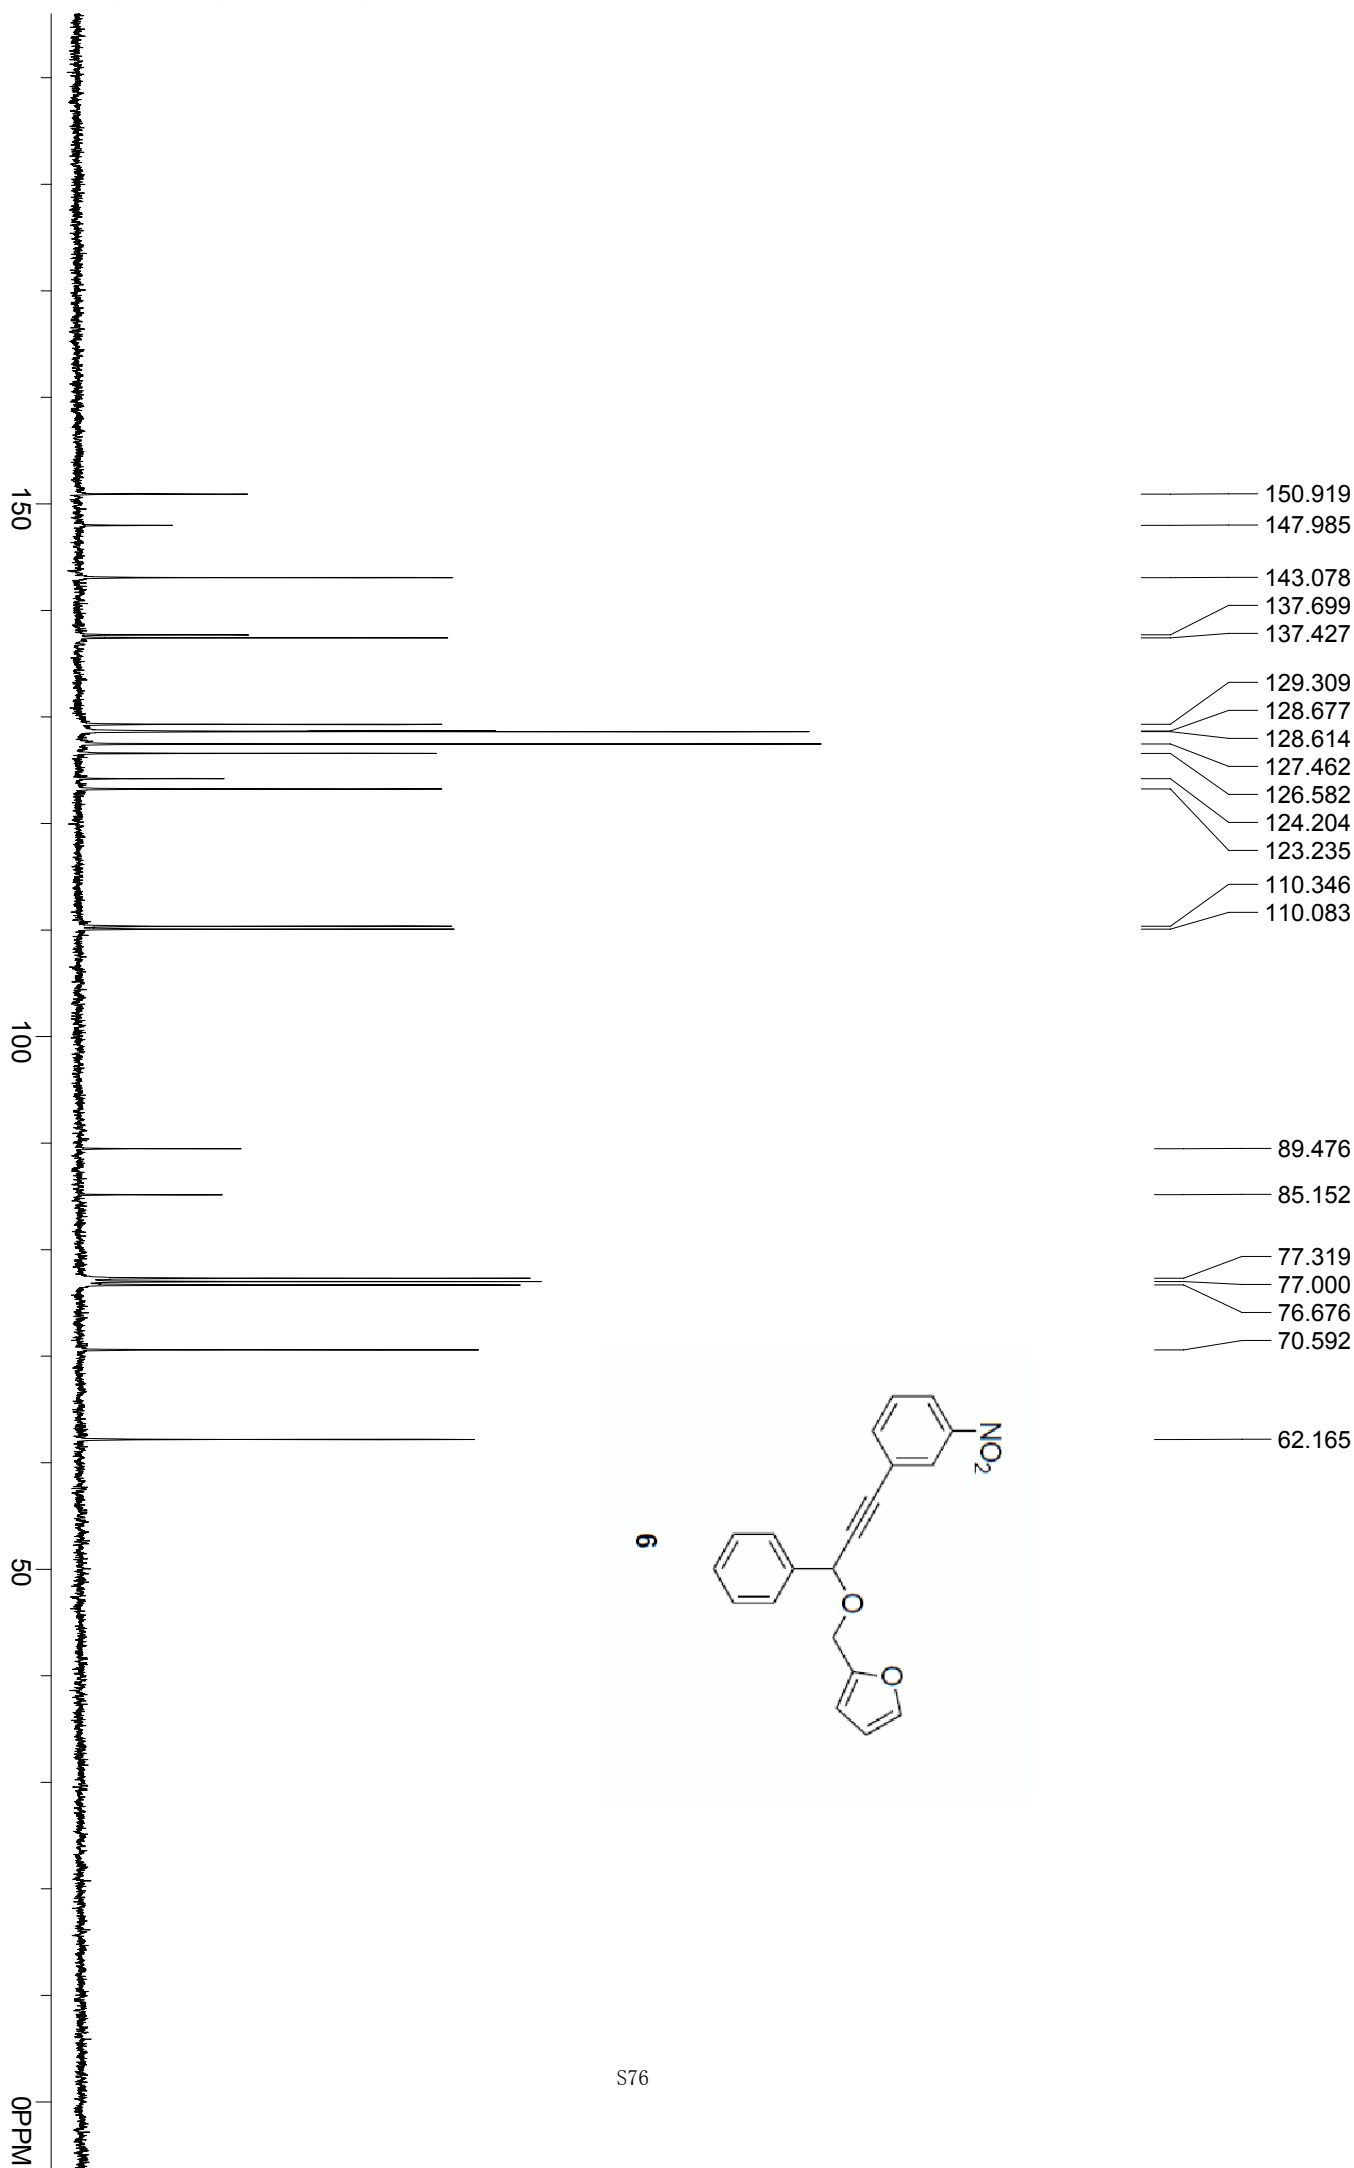

Supplement: c3ob27503e.pdf [file c3ob27503e.pdf]
